# Supplementary material for: Synthesis of highly substituted 2-spiropiperidines
Source: Royal Society of Chemistry journal article supplement (doi:10.1039/c8ob01272e), 2018-01-01

## Supporting Information

### Synthesis of highly substituted 2-spiropiperidines

*Samuel D. Griggs, Nathan Thompson, Daniel T. Tape, Marie Fabre and Paul. A. Clarke\**

#### Contents

|                                                                                                        |    |
|--------------------------------------------------------------------------------------------------------|----|
| Experimental Procedures for the preparation of <b>2</b> , <b>3</b> , <b>4</b> , <b>5</b> and <b>7k</b> | p2 |
| Copies of spectroscopic data for new compounds                                                         | p4 |

### 3-Oxo-5-phenyl-5-(toluene-4-sulfonylamino)-pentanoic acid methyl ester (2)

To a solution of diisopropylamine (824  $\mu$ L, 5.89 mmol) in THF (10 mL) at  $-78^{\circ}\text{C}$  was added *n*-BuLi (2.41 mL, 5.79 mmol) dropwise. The mixture was warmed to  $0^{\circ}\text{C}$  for 15 mins, then re-cooled to  $-78^{\circ}\text{C}$ . A solution of methyl acetoacetate (312  $\mu$ L, 2.90 mmol) in THF (2 mL) was added *via* syringe pump over 20 mins. The mixture was warmed to  $-50^{\circ}\text{C}$ , and a solution of *N*-Benzylidene-4-methyl-benzenesulfonamide (250 mg, 0.965 mmol) in THF (2 mL) was added fast. The reaction was stirred for 40 mins, then quenched with sat. aq.  $\text{NH}_4\text{Cl}$  (4 mL). The mixture was warmed to rt, and layers were separated. The aqueous was extracted with EtOAc (2 x 20 mL). Organics were combined, washed with water (10 mL), and brine (10 mL), dried ( $\text{MgSO}_4$ ), filtered, and concentrated *in vacuo*. The residue was purified by column chromatography (10-30% EtOAc/hexane) to afford the title compound (225 mg, 0.600 mmol, 62% yield) as a colourless oil. Spectroscopic data was identical to that previously reported.<sup>1</sup>

$^1\text{H}$  NMR (400 MHz,  $\text{CDCl}_3$ ):  $\delta$  7.59-7.54 (m, 2H), 7.20-7.11 (m, 5H), 7.09-7.04 (m, 2H), 5.69 (d,  $J = 7.2$  Hz, 1H), 4.73 (dt,  $J = 7.2, 6.3$  Hz, 1H), 3.65 (s, 3H), 3.36 (d,  $J = 15.5$  Hz, 1H), 3.31 (d,  $J = 15.5$  Hz, 1H), 3.17 (dd,  $J = 17.4, 6.3$  Hz, 1H), 3.01 (dd,  $J = 17.4, 6.3$  Hz, 1H-4), 2.36 (s, 3H) ppm.

### 2-Isopropylidene-3-oxo-5-phenyl-5-(toluene-4-sulfonylamino)-pentanoic acid methyl ester (3)

To a 0.5 M solution of  $\text{TiCl}_4$  in THF (2 mL, 1.07 mmol) at  $0^{\circ}\text{C}$  was added a solution of **2** (400 mg, 1.07 mmol), acetone (156  $\mu$ L, 2.13 mmol), and pyridine (345  $\mu$ L, 4.26 mmol) in THF (2 mL). The reaction was stirred overnight at rt. The reaction mixture was partitioned between water (10 mL) and EtOAc (30 mL). The aqueous was extracted with EtOAc (2 x 15 mL). Organics were combined, washed with  $\text{NaHCO}_3$  (30 mL), water (30 mL), and brine (30 mL), dried ( $\text{MgSO}_4$ ), filtered, and concentrated *in vacuo*. The residue was purified by column chromatography (15% EtOAc/hexane) to afford the title compound (115 mg, 0.277 mmol, 26% yield) as a yellow oil.

$^1\text{H}$  NMR (400 MHz,  $\text{CDCl}_3$ ):  $\delta$  7.59-7.54 (m, 2H), 7.19-7.12 (m, 5H), 7.11-7.05 (m, 2H), 5.71 (d,  $J = 7.0$  Hz, 1H), 4.74 (dt,  $J = 7.0, 6.2$  Hz, 1H), 3.60 (s, 3H), 3.12 (dd,  $J = 17.5, 6.2$  Hz, 1H), 2.96 (dd,  $J = 17.5, 6.2$  Hz, 1H), 2.36 (s, 3H), 2.05 (s, 3H), 1.65 (s, 3H) ppm;  $^{13}\text{C}$ -NMR (101 MHz,  $\text{CDCl}_3$ ):  $\delta$  201.1, 165.5, 156.1, 143.3, 139.8, 137.4, 130.9, 129.5, 128.5, 127.7, 127.3, 126.8, 54.3, 51.9, 49.4, 23.5, 23.1, 21.6 ppm; IR (ATR):  $\nu_{\text{max}}$  3278, 2952, 1726, 1694, 1156  $\text{cm}^{-1}$ ; HRMS (ESI) 438.1338 ( $\text{M} + \text{Na}^+$ .  $\text{C}_{22}\text{H}_{25}\text{NNaO}_5\text{S}$  requires 438.1346).

### 2-Isopropylidene-3-oxo-5-phenyl-pent-4-enoic acid methyl ester (4)

To a 0.5 M solution of  $\text{TiCl}_4$  in THF (1.5 mL, 0.735 mmol) at  $0^{\circ}\text{C}$  was added a solution of **5** (150 mg, 0.735 mmol), acetone (108  $\mu$ L, 1.47 mmol), and pyridine (240  $\mu$ L, 2.94 mmol) in THF (1 mL). The reaction was stirred overnight at rt. The reaction mixture was partitioned between water (5 mL) and EtOAc (30 mL). The aqueous was extracted with EtOAc (2 x 15 mL). Organics were combined, washed with  $\text{NaHCO}_3$  (30 mL), water (30 mL), and brine (30 mL), dried ( $\text{Na}_2\text{SO}_4$ ), filtered, and concentrated *in vacuo*. The residue was purified by column chromatography (5% EtOAc/hexane) to afford the title compound (23 mg, 0.0942 mmol, 13% yield) as a yellow oil.

<sup>1</sup> P. A. Clarke, A. V. Zaytsev, T. W. Morgan, A. C. Whitwood and C. Wilson, *Org. Lett.* 2008, **10**, 2877-2880.

<sup>1</sup>H NMR (500 MHz, CDCl<sub>3</sub>): δ 7.58 – 7.49 (m, 2H), 7.42 – 7.35 (m, 3H), 7.42 (d, *J* = 16.2 Hz, 1H), 6.80 (d, *J* = 16.2 Hz, 1H), 3.69 (s, 3H), 2.26 (s, 3H), 1.87 (s, 3H) ppm; <sup>13</sup>C-NMR (101 MHz, CDCl<sub>3</sub>): δ 195.5, 165.5, 154.8, 145.6, 134.5, 130.9, 129.5, 129.1, 128.6, 127.6, 51.9, 24.2, 22.5 ppm; IR (ATR): ν<sub>max</sub> 3063, 2912, 1708, 1641, 1620, 1596, 1435, 1301, 1238, 1217, 1201, 1097, 1033 cm<sup>-1</sup>; HRMS (ESI) 267.0992 (M + Na<sup>+</sup>. C<sub>16</sub>H<sub>16</sub>NaO<sub>3</sub> requires 267.0992).

### 3-Hydroxy-5-phenyl-penta-2,4-dienoic acid methyl ester (5)

To a solution of **6**<sup>2</sup> (500 mg, 2.25 mmol) in CH<sub>2</sub>Cl<sub>2</sub> (3 mL) was added acetic anhydride (223 μL, 2.36 mmol), Et<sub>3</sub>N (470 μL, 3.38 mmol) and DMAP (cat.). The reaction was stirred for 2h at rt. MeOH (400 μL) was added, and the mixture stirred for 15 mins. The mixture was diluted with CH<sub>2</sub>Cl<sub>2</sub> (8 mL) and partitioned with 0.1 M HCl (10 mL). Organics were combined, washed with water (10 mL), CuSO<sub>4</sub> (10 mL), and brine (10 mL), dried (MgSO<sub>4</sub>), filtered, and concentrated *in vacuo*. The residue was purified by column chromatography (5% EtOAc/hexane) to afford title compound (201 mg, 0.905 mmol, 44% yield) as a white solid.

mp 93-96 °C; <sup>1</sup>H NMR (400 MHz, CDCl<sub>3</sub>): δ 11.9 (s, 1H), 7.51-7.47 (m, 2H), 7.44 (d, *J* = 16.0 Hz, 1H), 7.39-7.31 (m, 3H), 6.44 (dd, *J* = 16.0, 1.5 Hz, 1H), 5.18 (s, 1H), 3.77 (s, 3H) ppm; <sup>13</sup>C-NMR (101 MHz, CDCl<sub>3</sub>): δ 173.4, 169.4, 137.1, 135.4, 129.5, 128.9, 127.7, 121.9, 91.7, 51.5 ppm; IR (ATR): ν<sub>max</sub> 3027, 2953, 1634, 1590, 1445, 1202 cm<sup>-1</sup>; HRMS (ESI) 227.0695 (M + Na<sup>+</sup>. C<sub>14</sub>H<sub>16</sub>NNaO<sub>5</sub> requires 227.0679).

### [Benzenesulfonyl-(4-trifluoromethyl-phenyl)-methyl]-carbamic acid tert-butyl ester (7k)

Following the general procedure: 4-(Trifluoromethyl)benzaldehyde (6.00 g, 34.5 mmol), *tert*-butyl carbamate (2.69 g, 23.0 mmol) and benzenesulfinic acid sodium salt (7.54 g, 46.0 mmol). The white precipitate was triturated by stirring in diethyl ether (50 mL) for 1h at rt. Filtration gave the title compound, (6.87 g, 16.6 mmol, 72% yield) as a white solid. Spectroscopic data was identical to that previously reported.<sup>3</sup>

<sup>1</sup>H NMR (400 MHz, CDCl<sub>3</sub>): δ 7.94 (d, *J* = 7.8 Hz, 2H), 7.70-7.65 (m, 3H), 7.63-7.53 (m, 4H), 6.02 (d, *J* = 10.5 Hz, 1H), 5.93 (d, *J* = 10.5 Hz, 1H), 1.23 (s, 9H) ppm.

<sup>2</sup> P. A. Clarke, W. H. C. Martin, J. M. Hargreaves, C. Wilson and A. J. Blake, *Org. Biomol. Chem.* 2005, 3, 3551-3563.

<sup>3</sup> L. Huang and W. D. Wulff, *J. Am. Chem. Soc.* 2011, **133**, 8892-8895.

Solvent: CDCl<sub>3</sub>  
Frequency: 400 Mhz

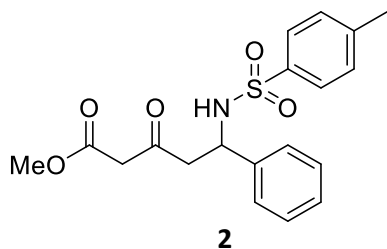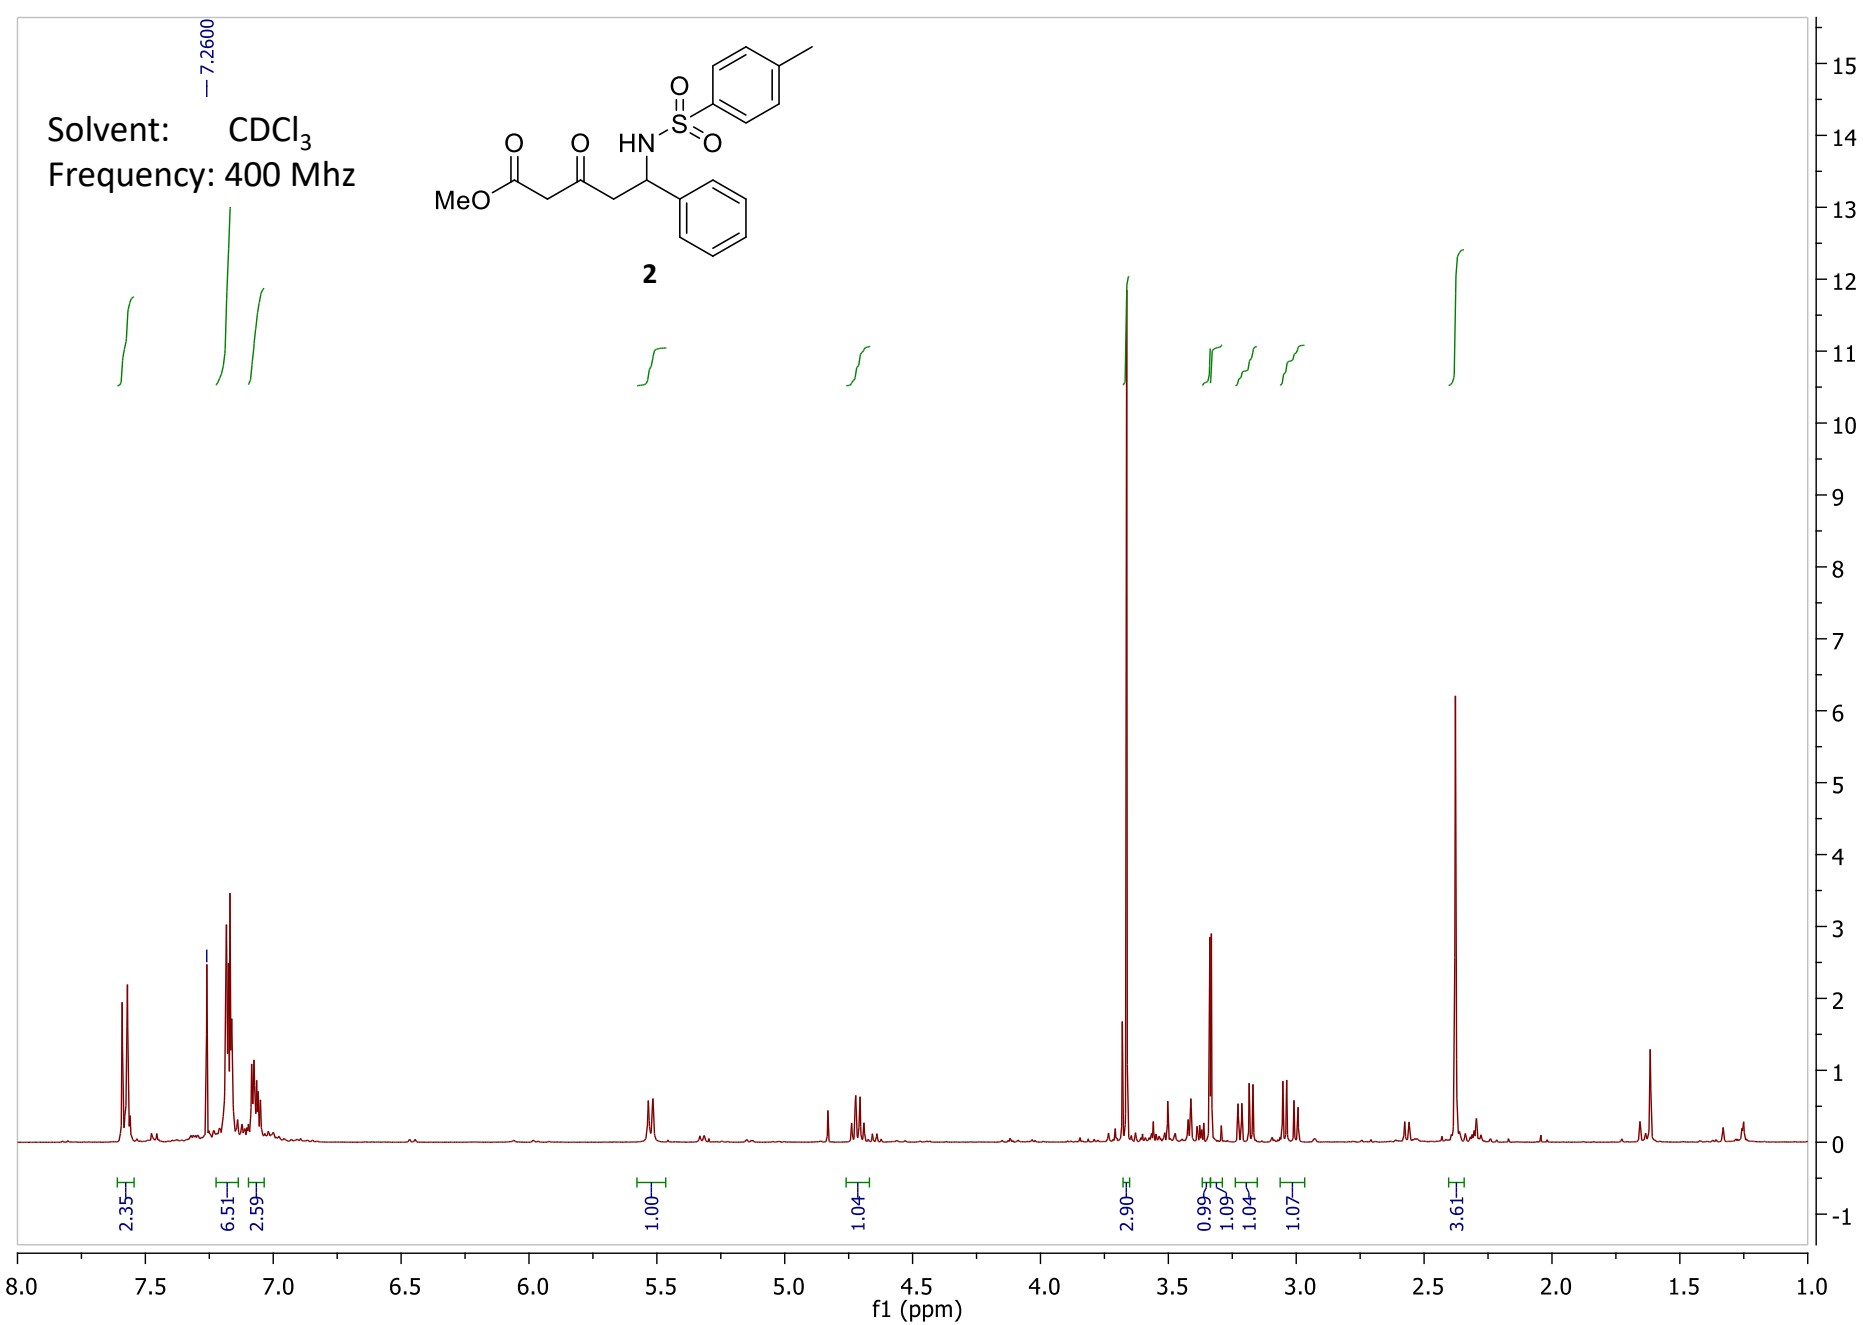

Solvent:  $\text{CDCl}_3$   
Frequency: 101 Mhz

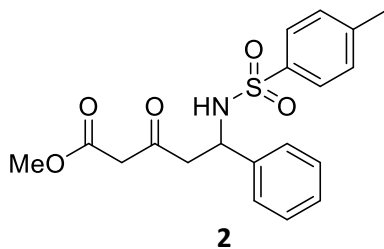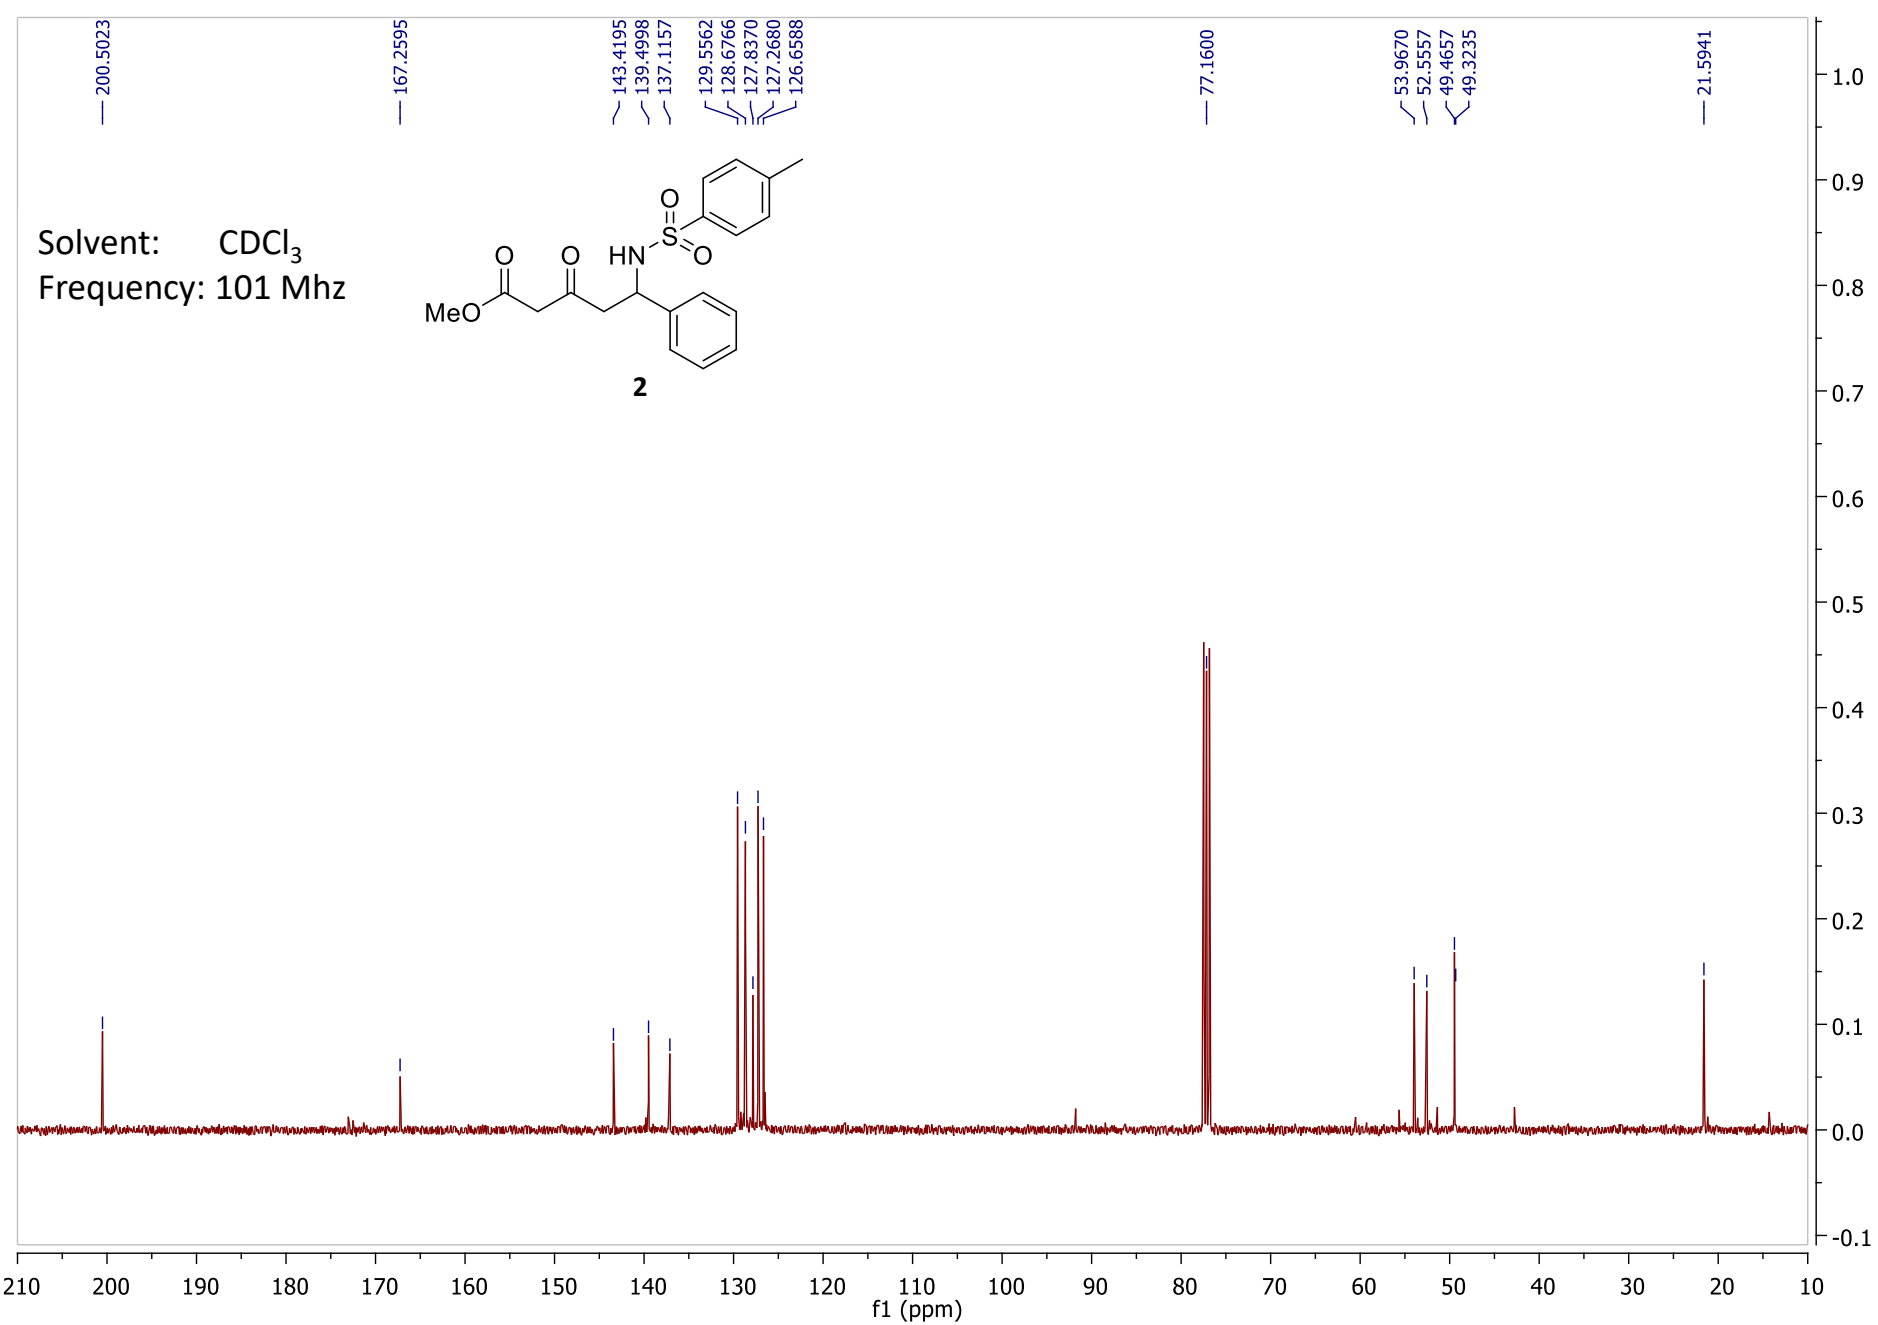

Solvent: CDCl<sub>3</sub>  
Frequency: 400 Mhz

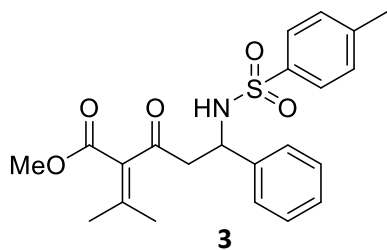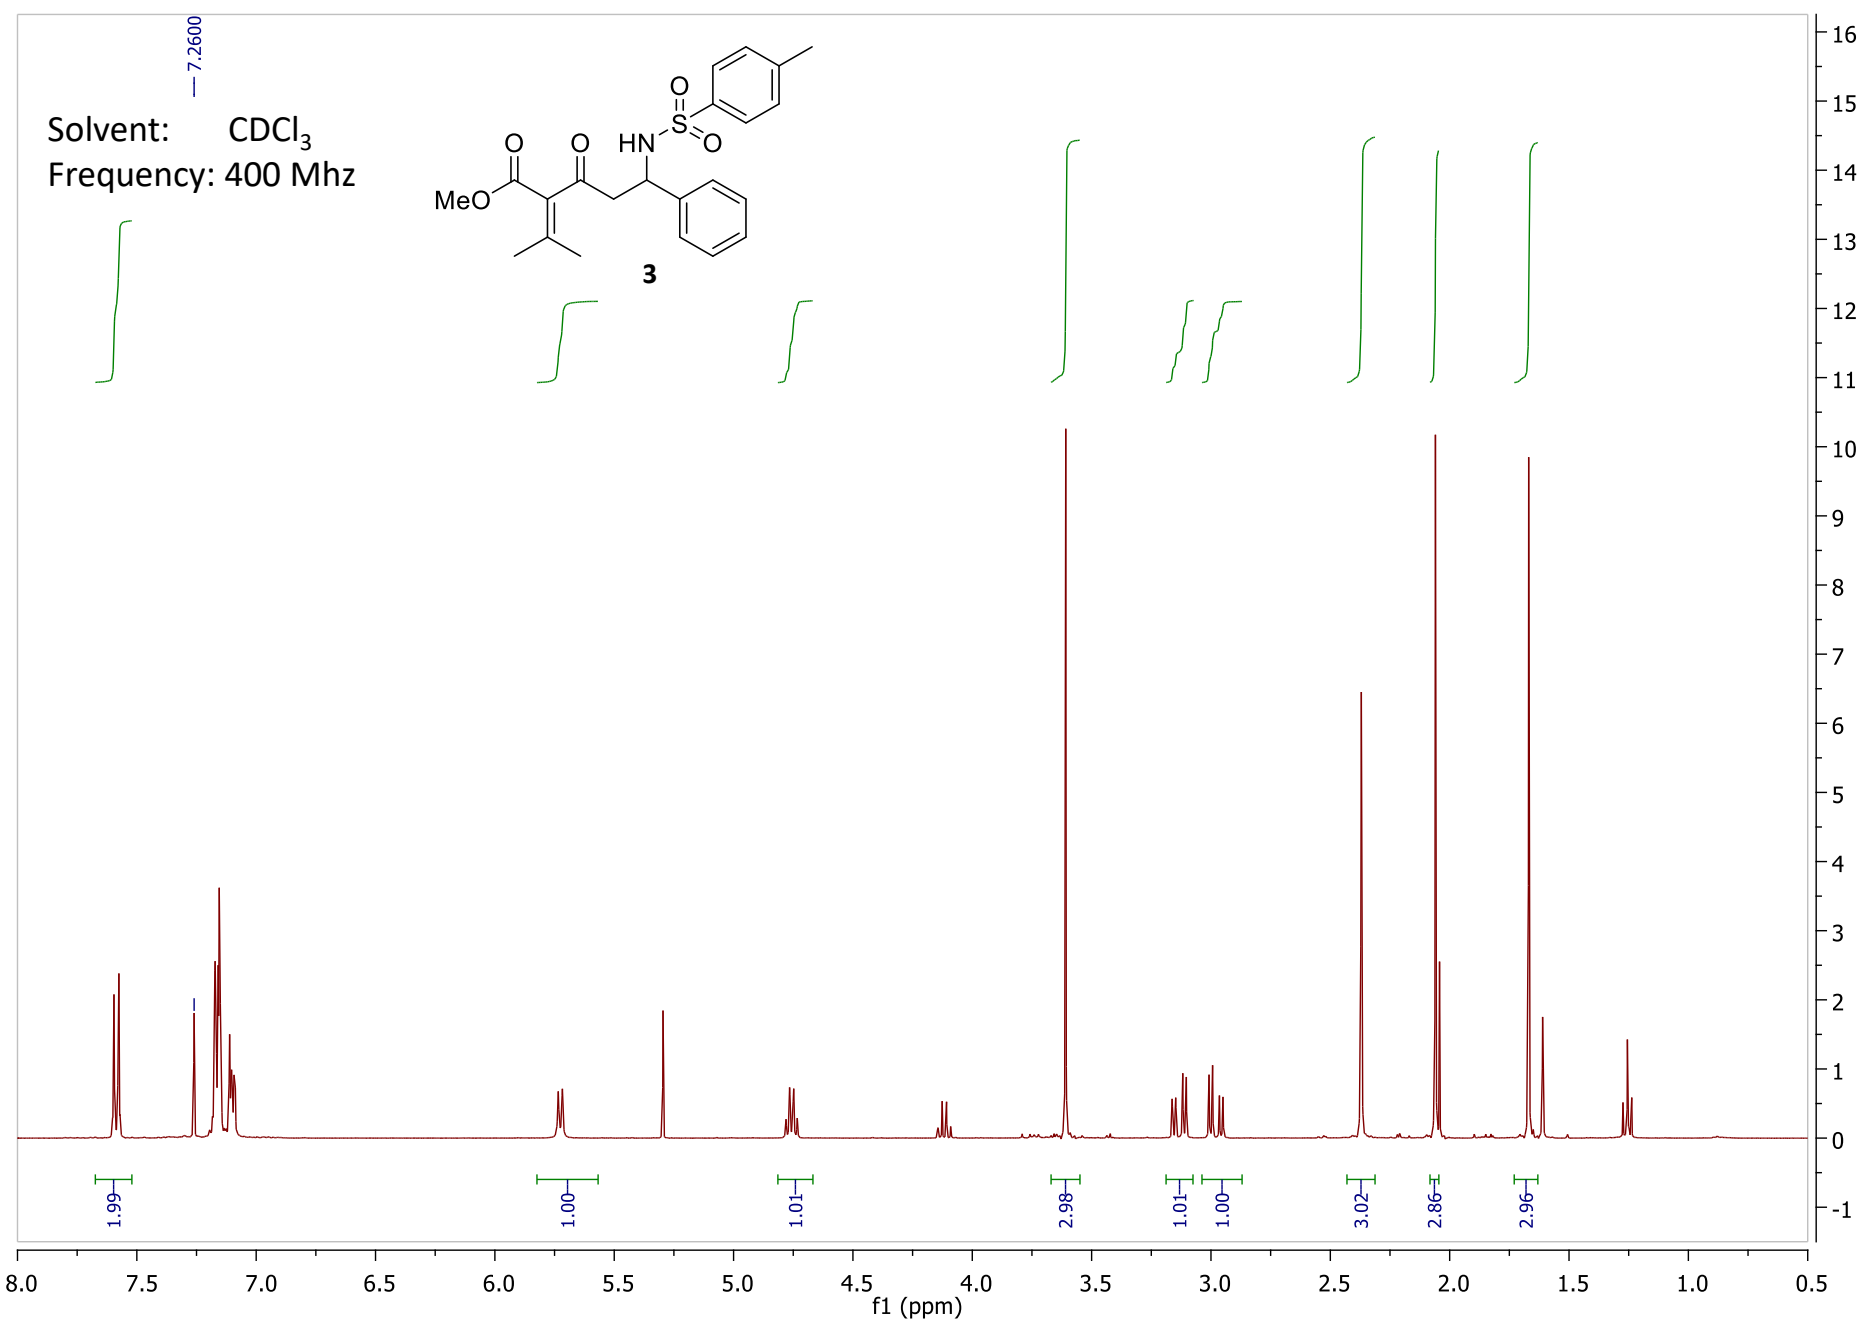

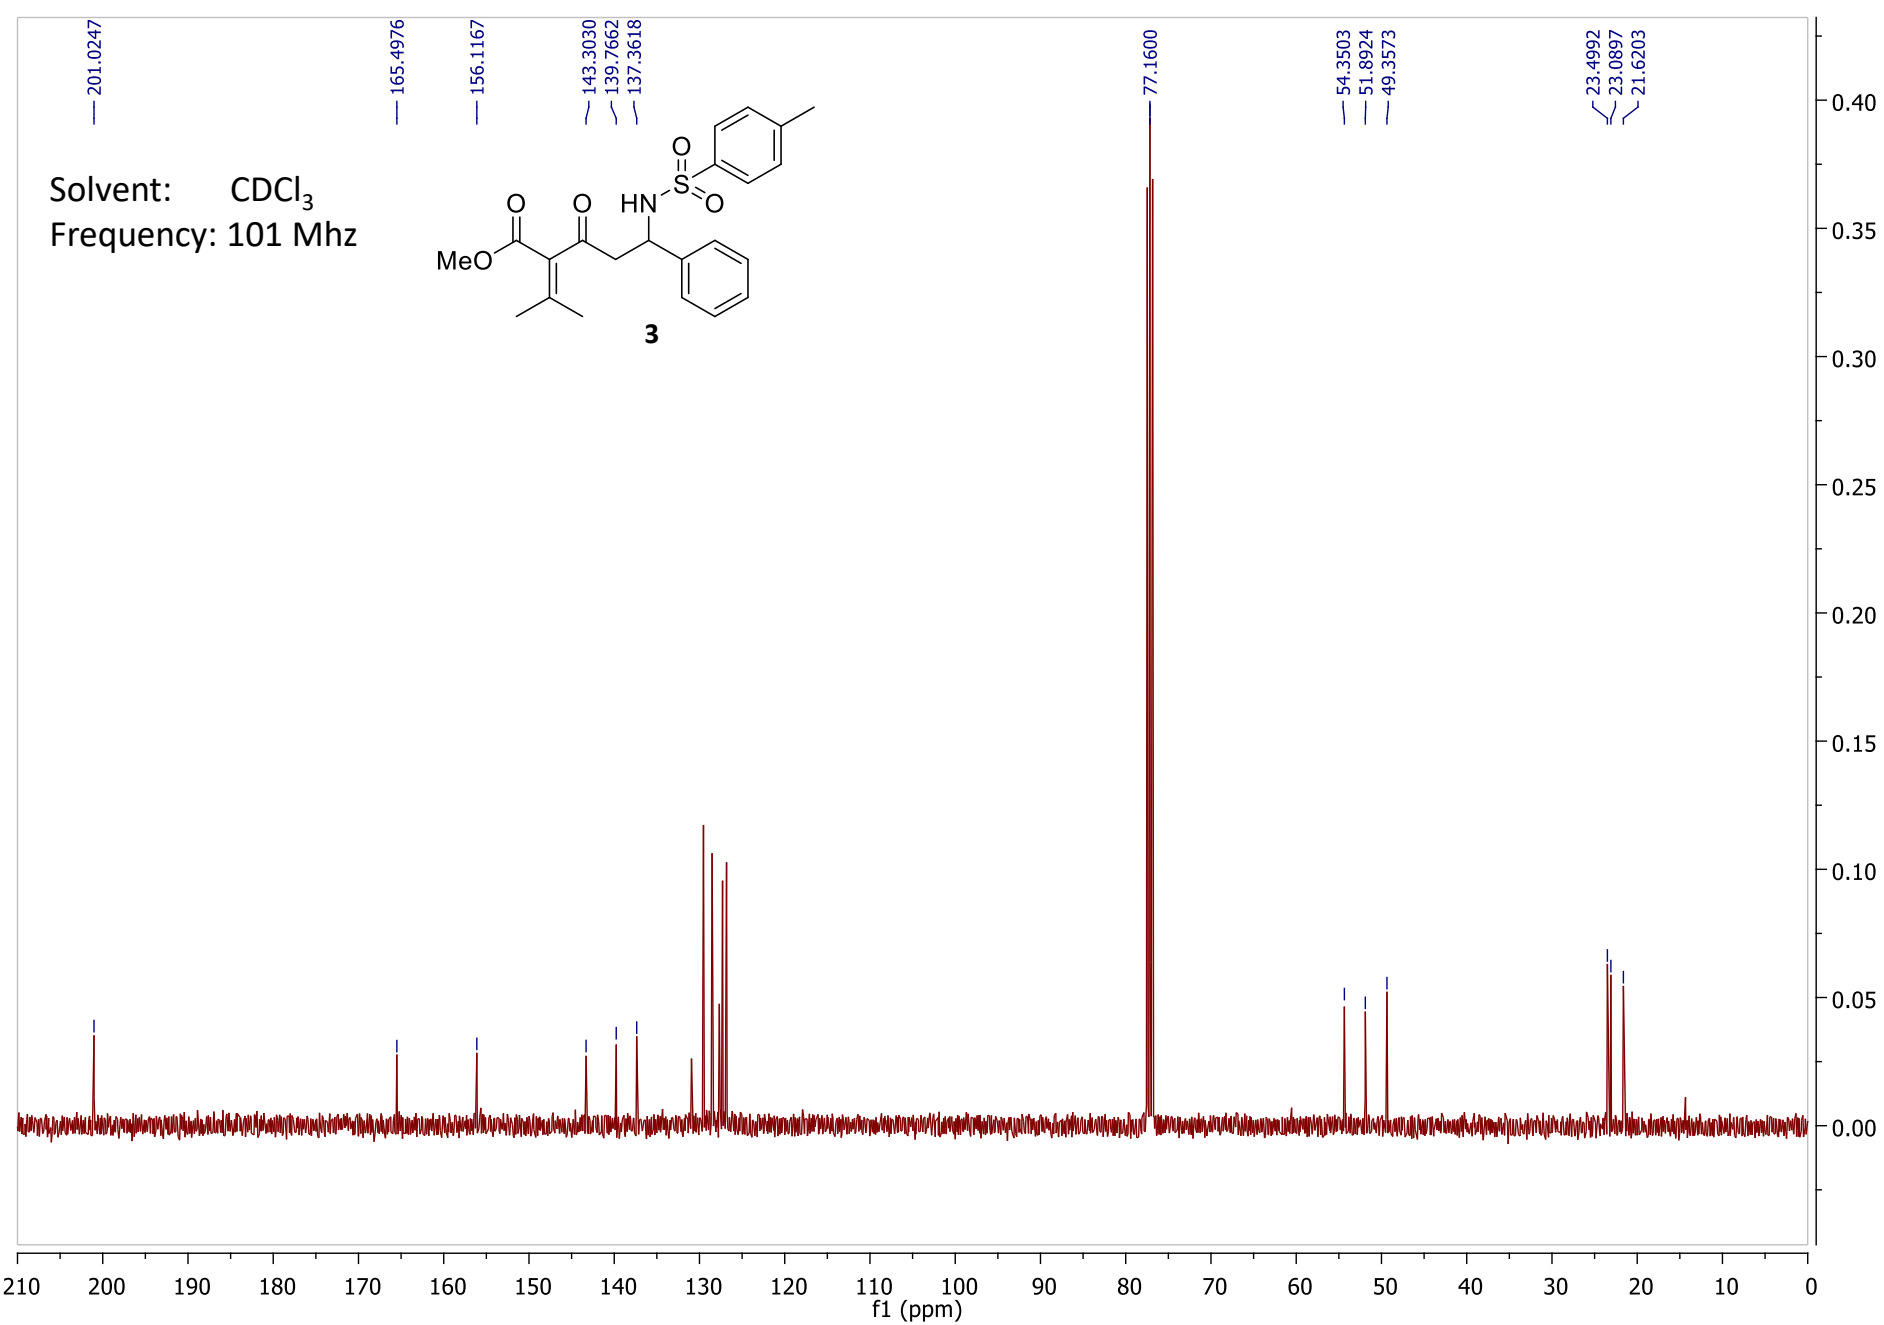

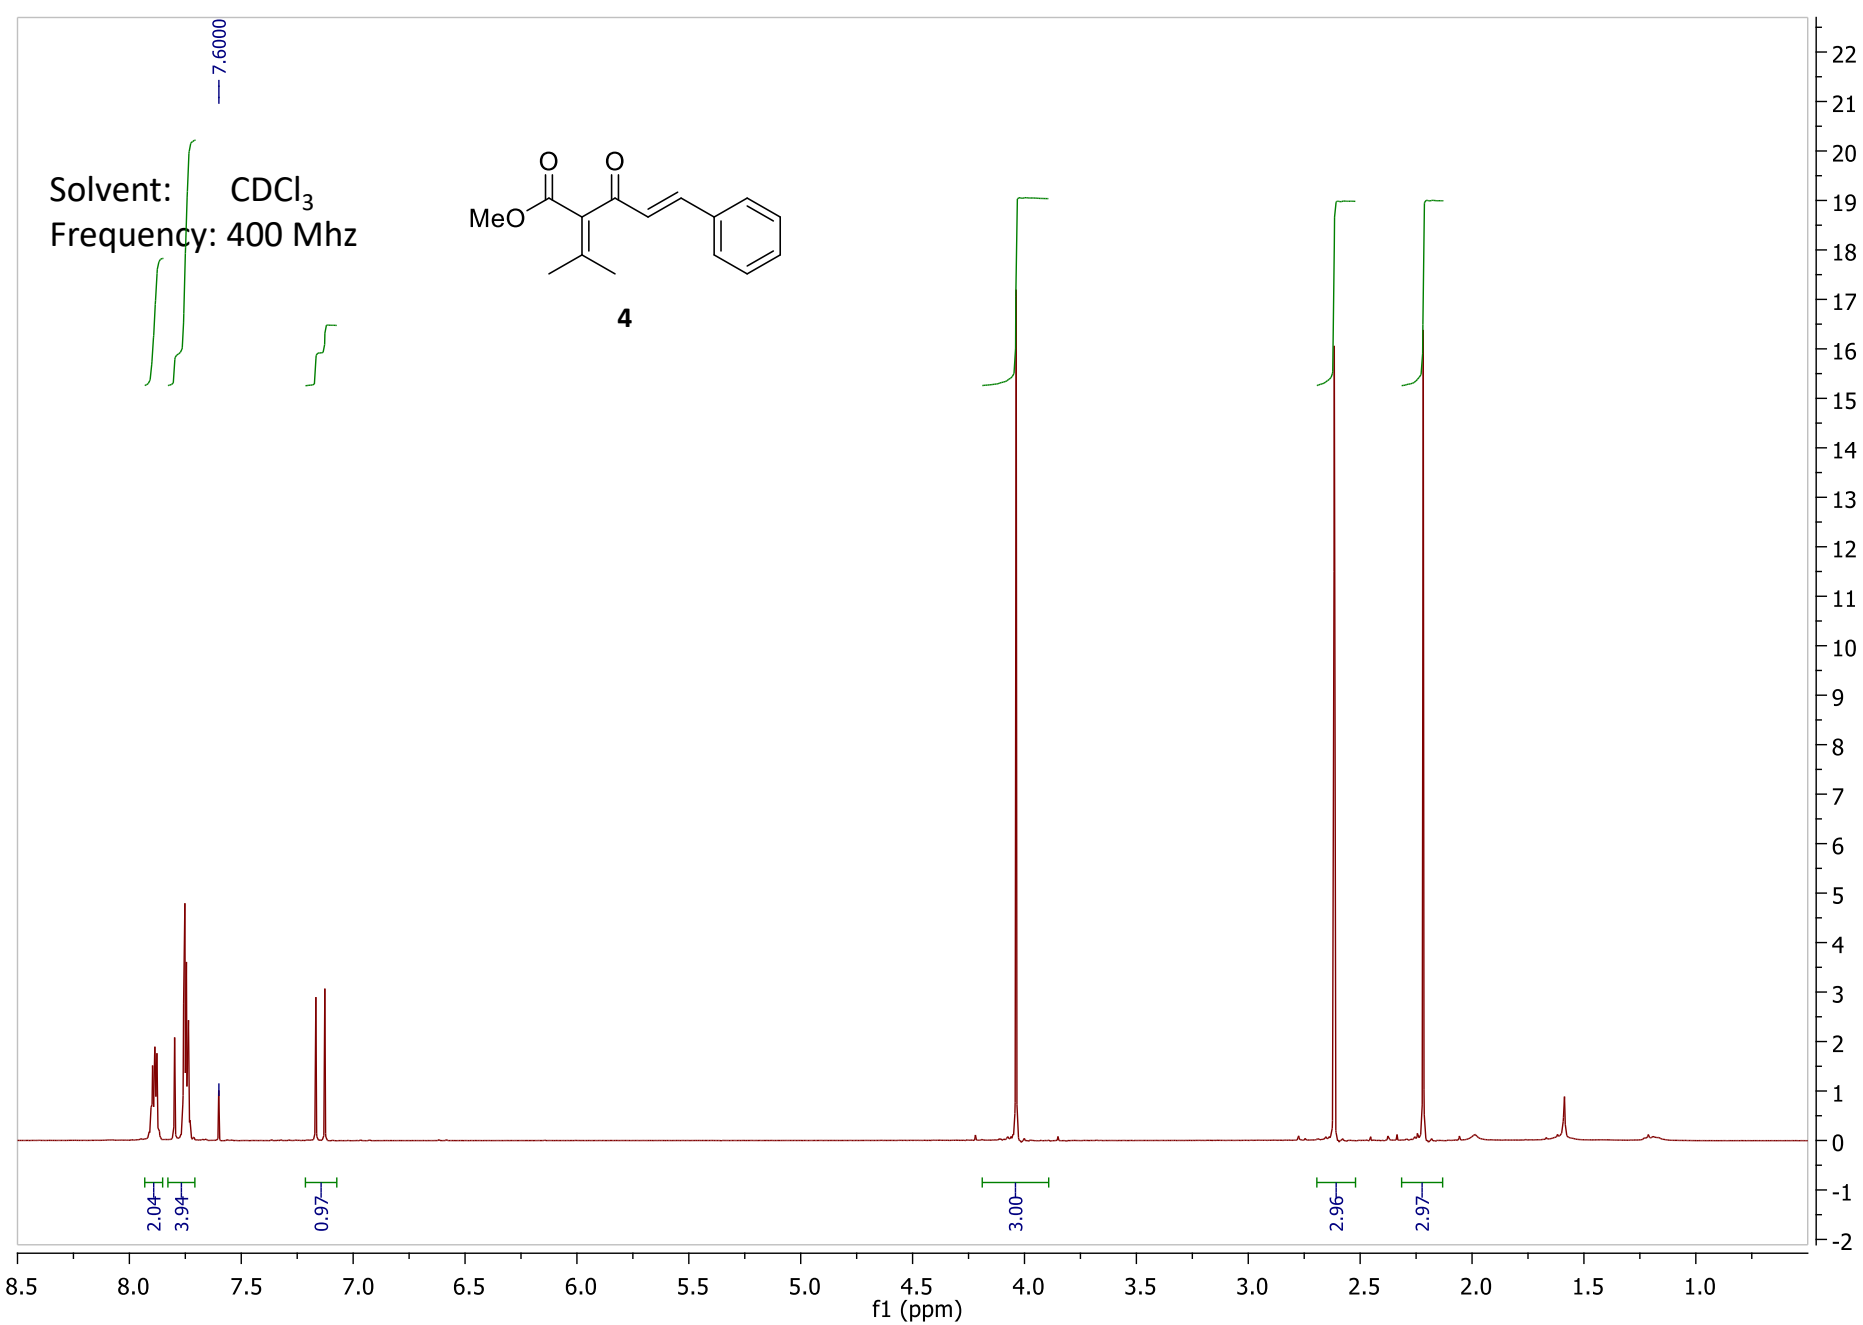



Solvent: CDCl<sub>3</sub>  
Frequency: 101 Mhz

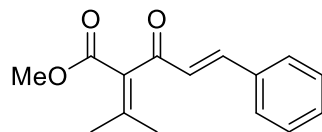

**4**

— 195.5101

— 165.4483

— 154.8207

— 145.6370

— 134.4290

— 130.9448

— 129.5045

— 129.1217

— 128.6265

— 127.5699

— 77.1600

— 51.8761

— 24.1681

— 22.5320

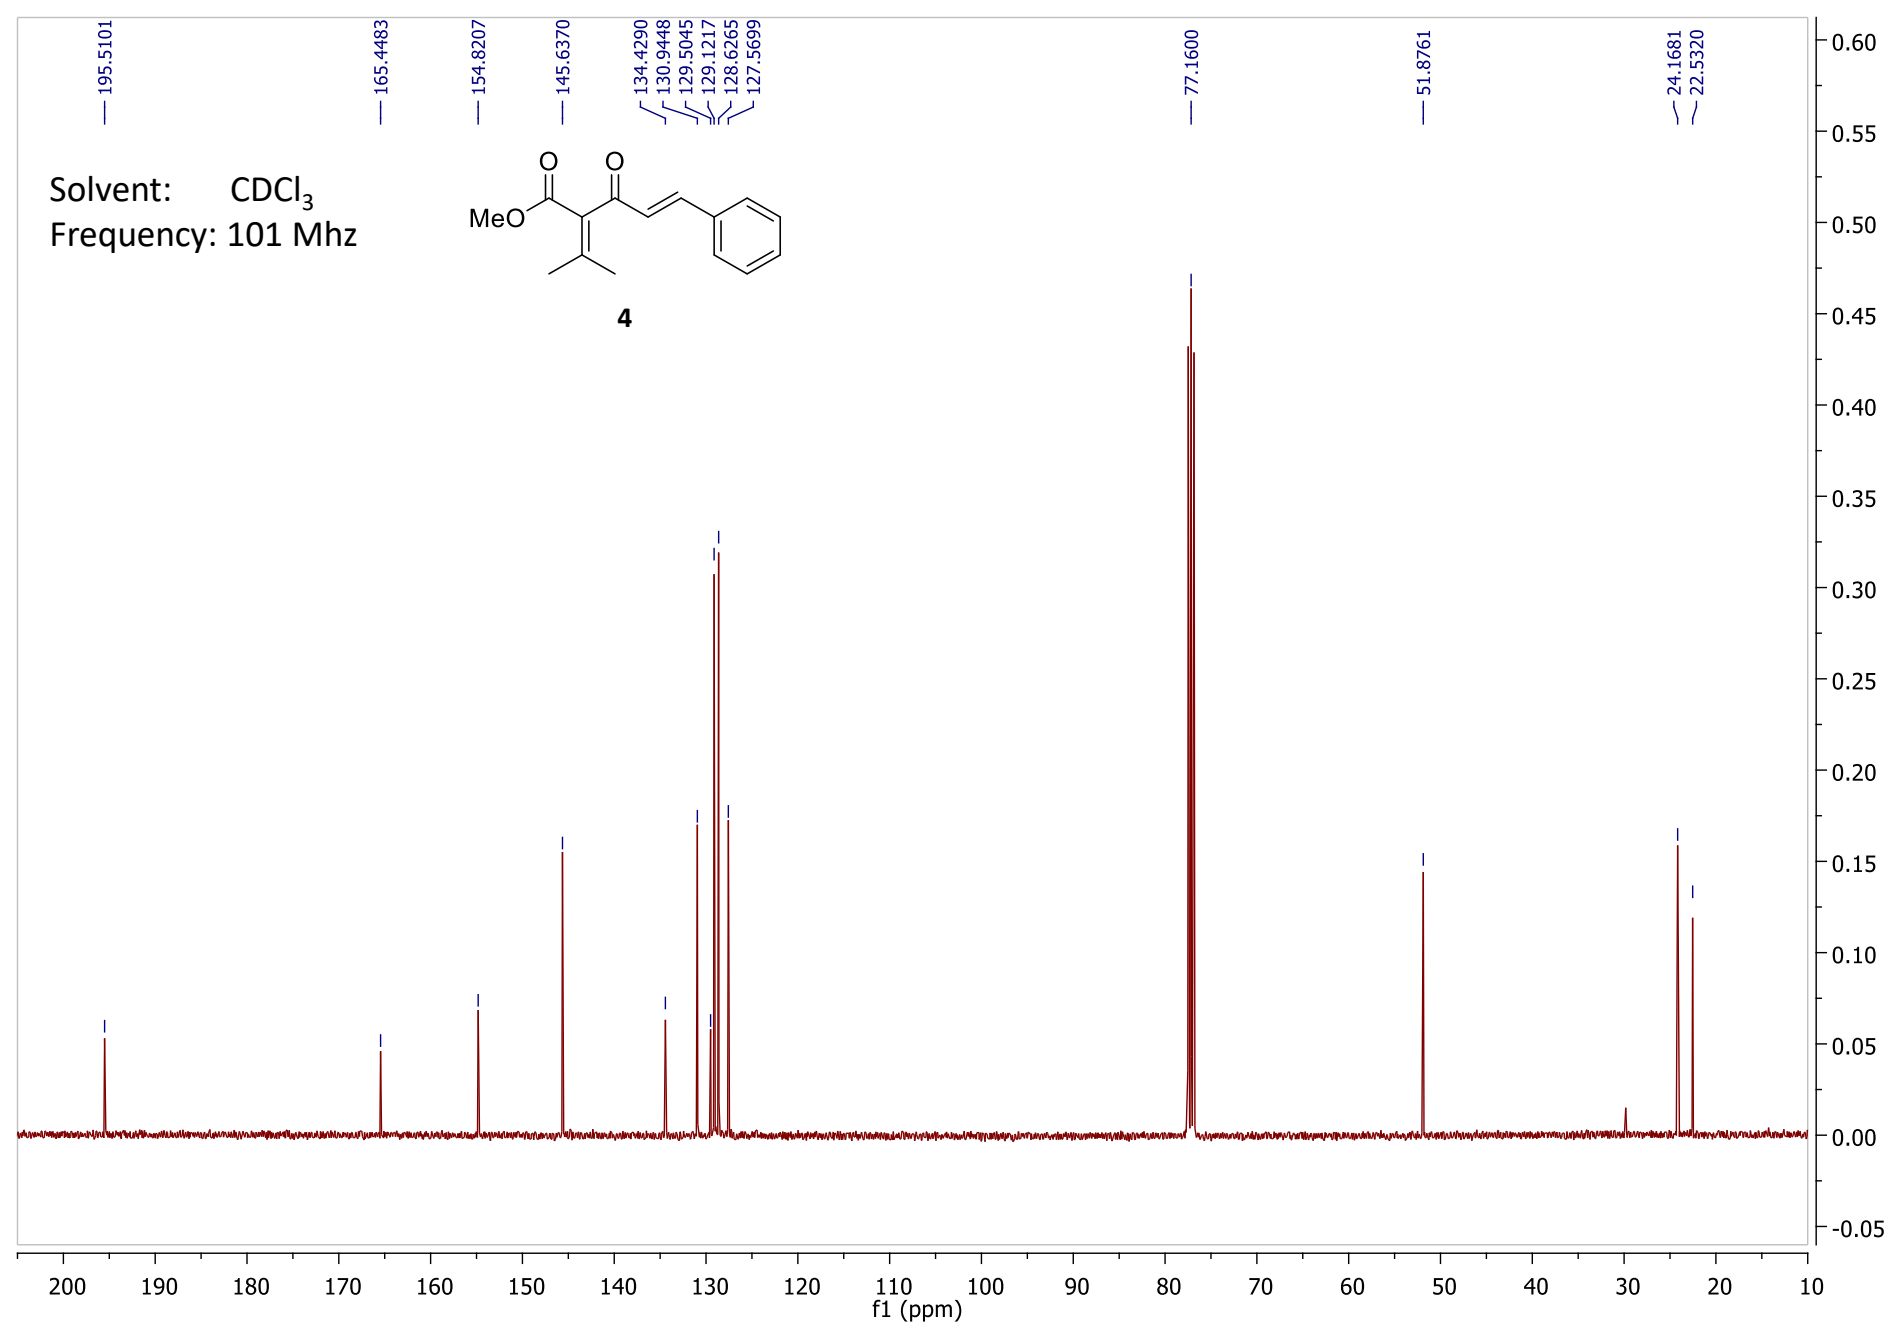

Solvent:  $\text{CDCl}_3$   
Frequency: 400 Mhz

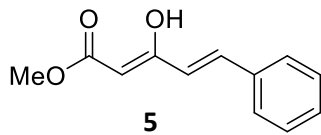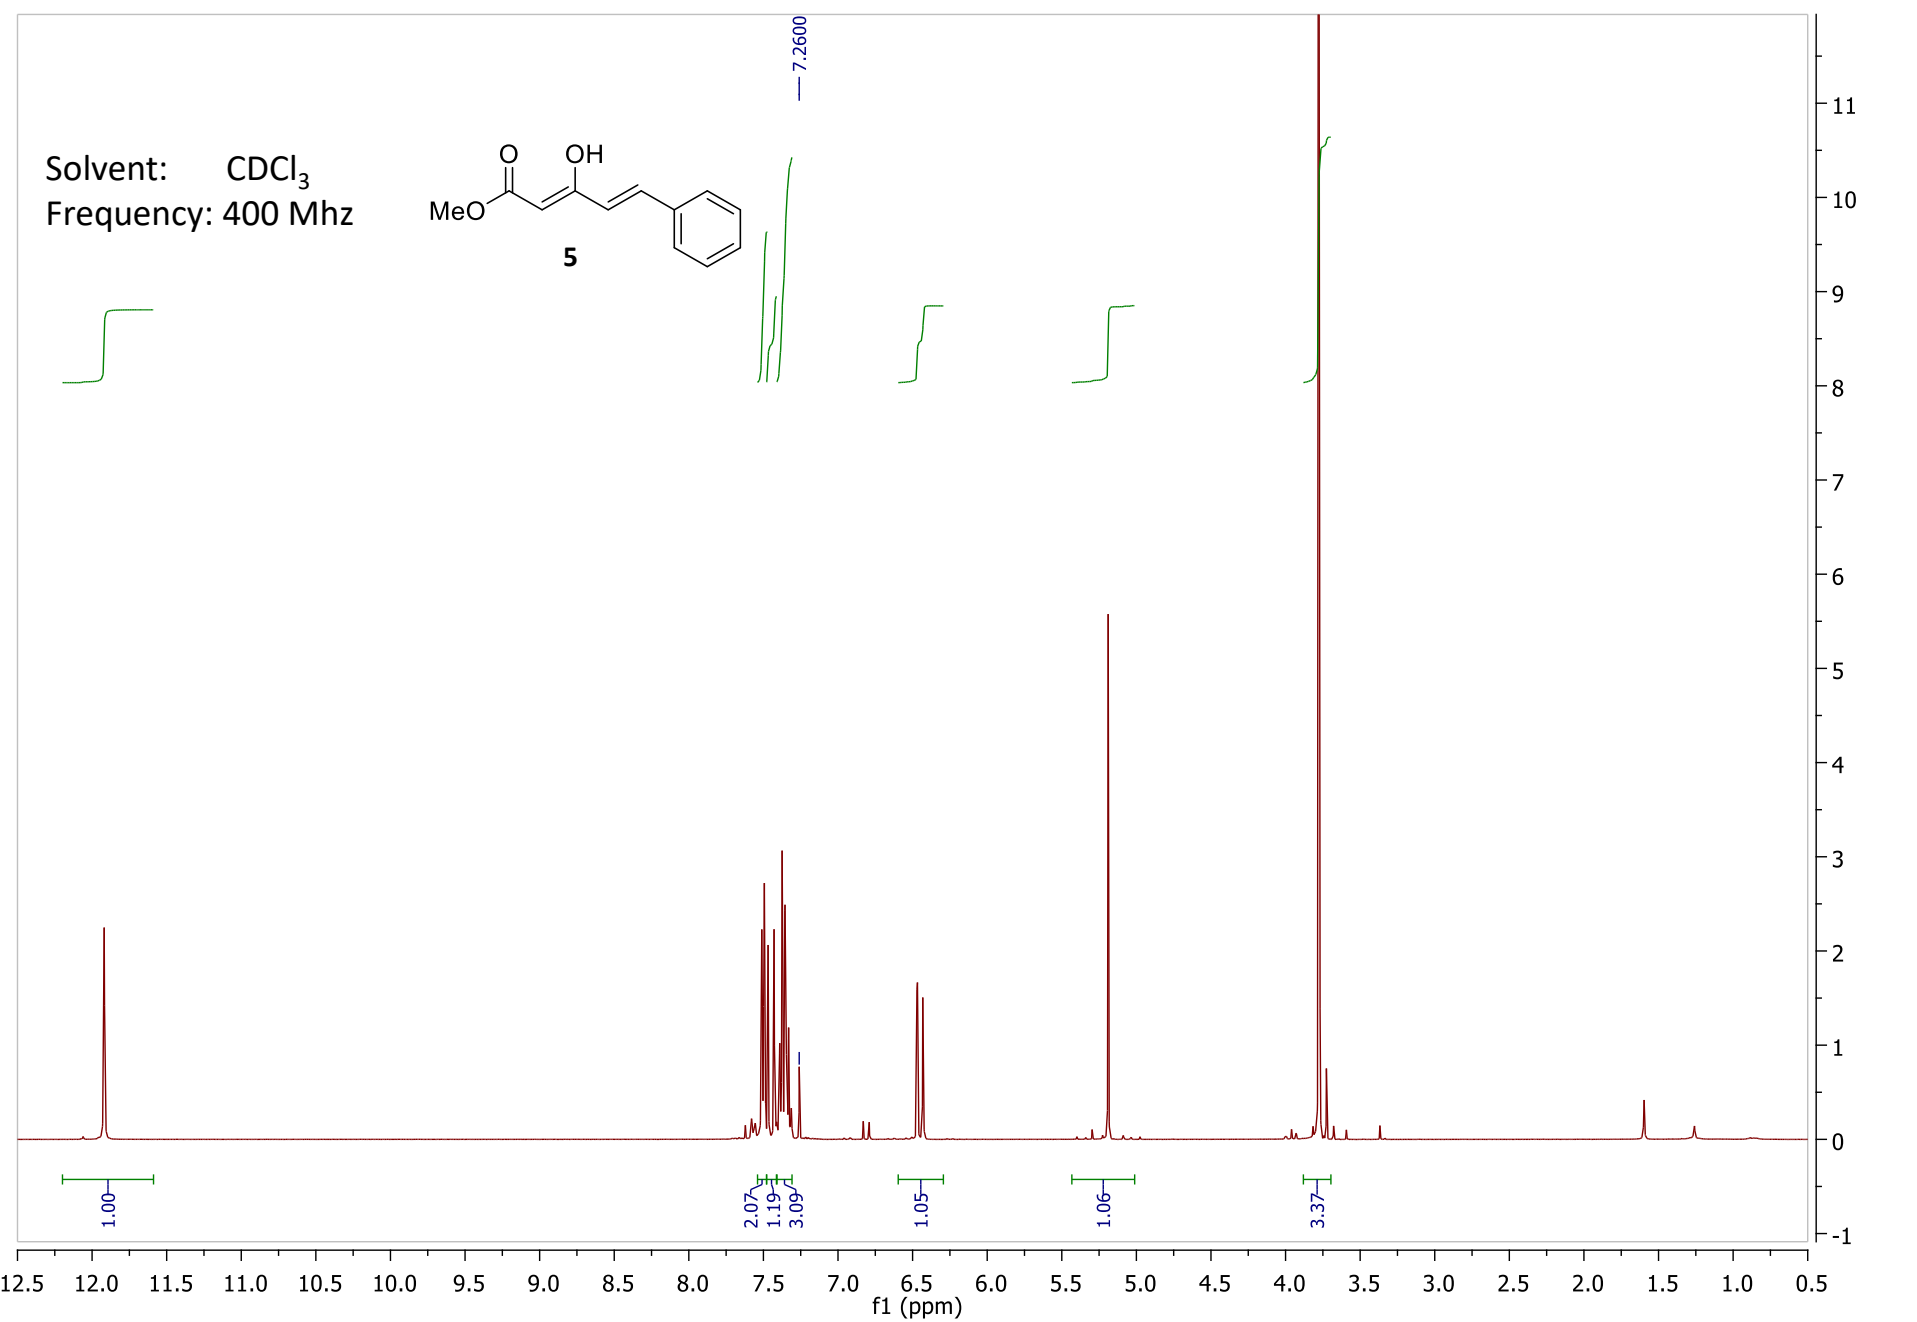

Solvent: CDCl<sub>3</sub>  
Frequency: 101 Mhz

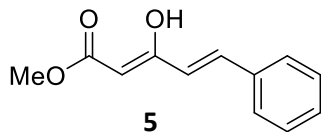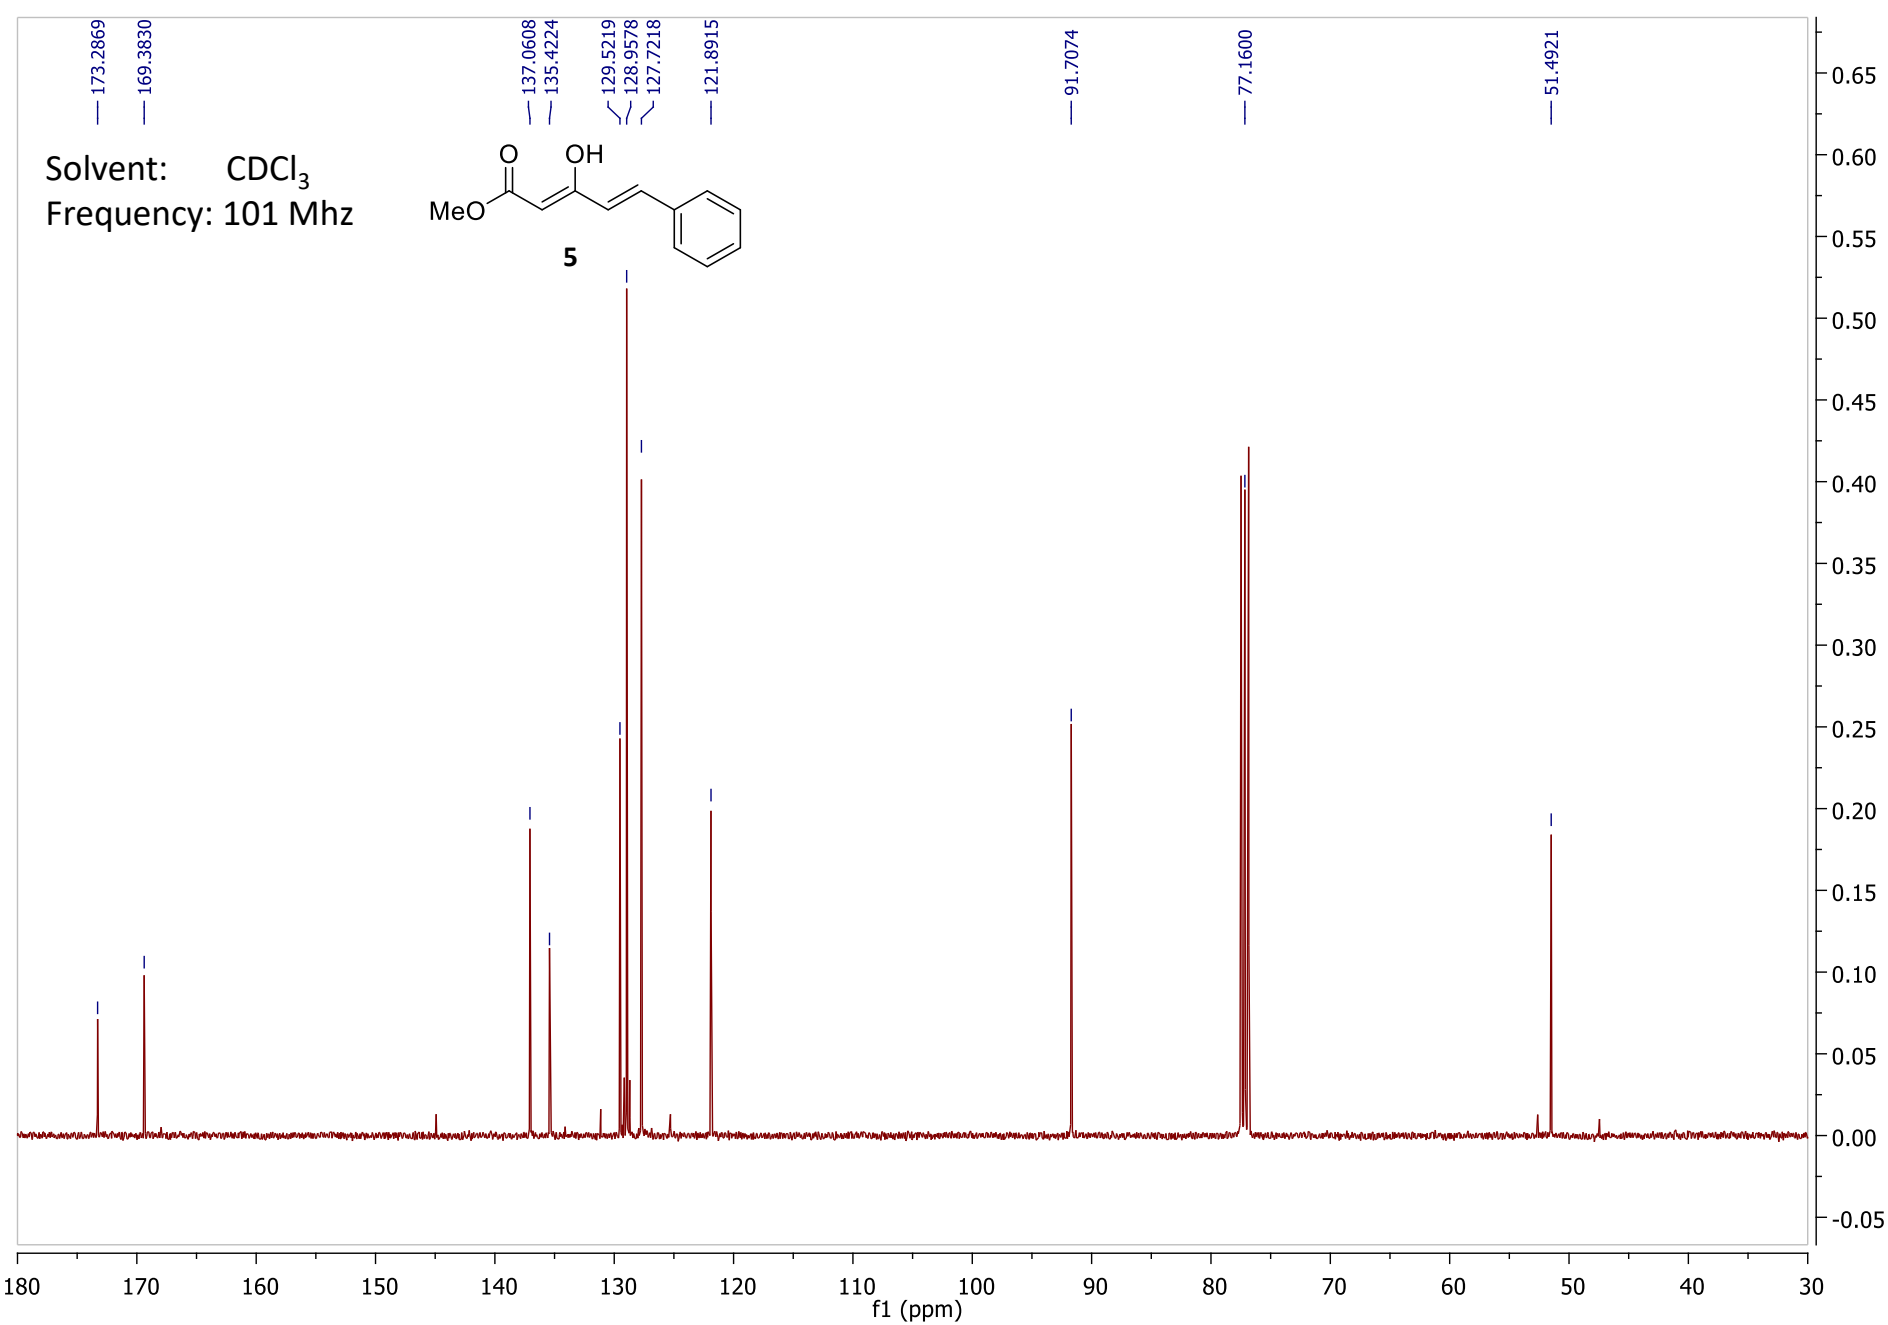

Solvent:  $\text{CDCl}_3$   
Frequency: 400 Mhz

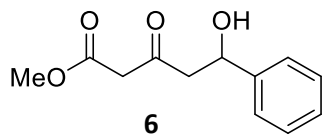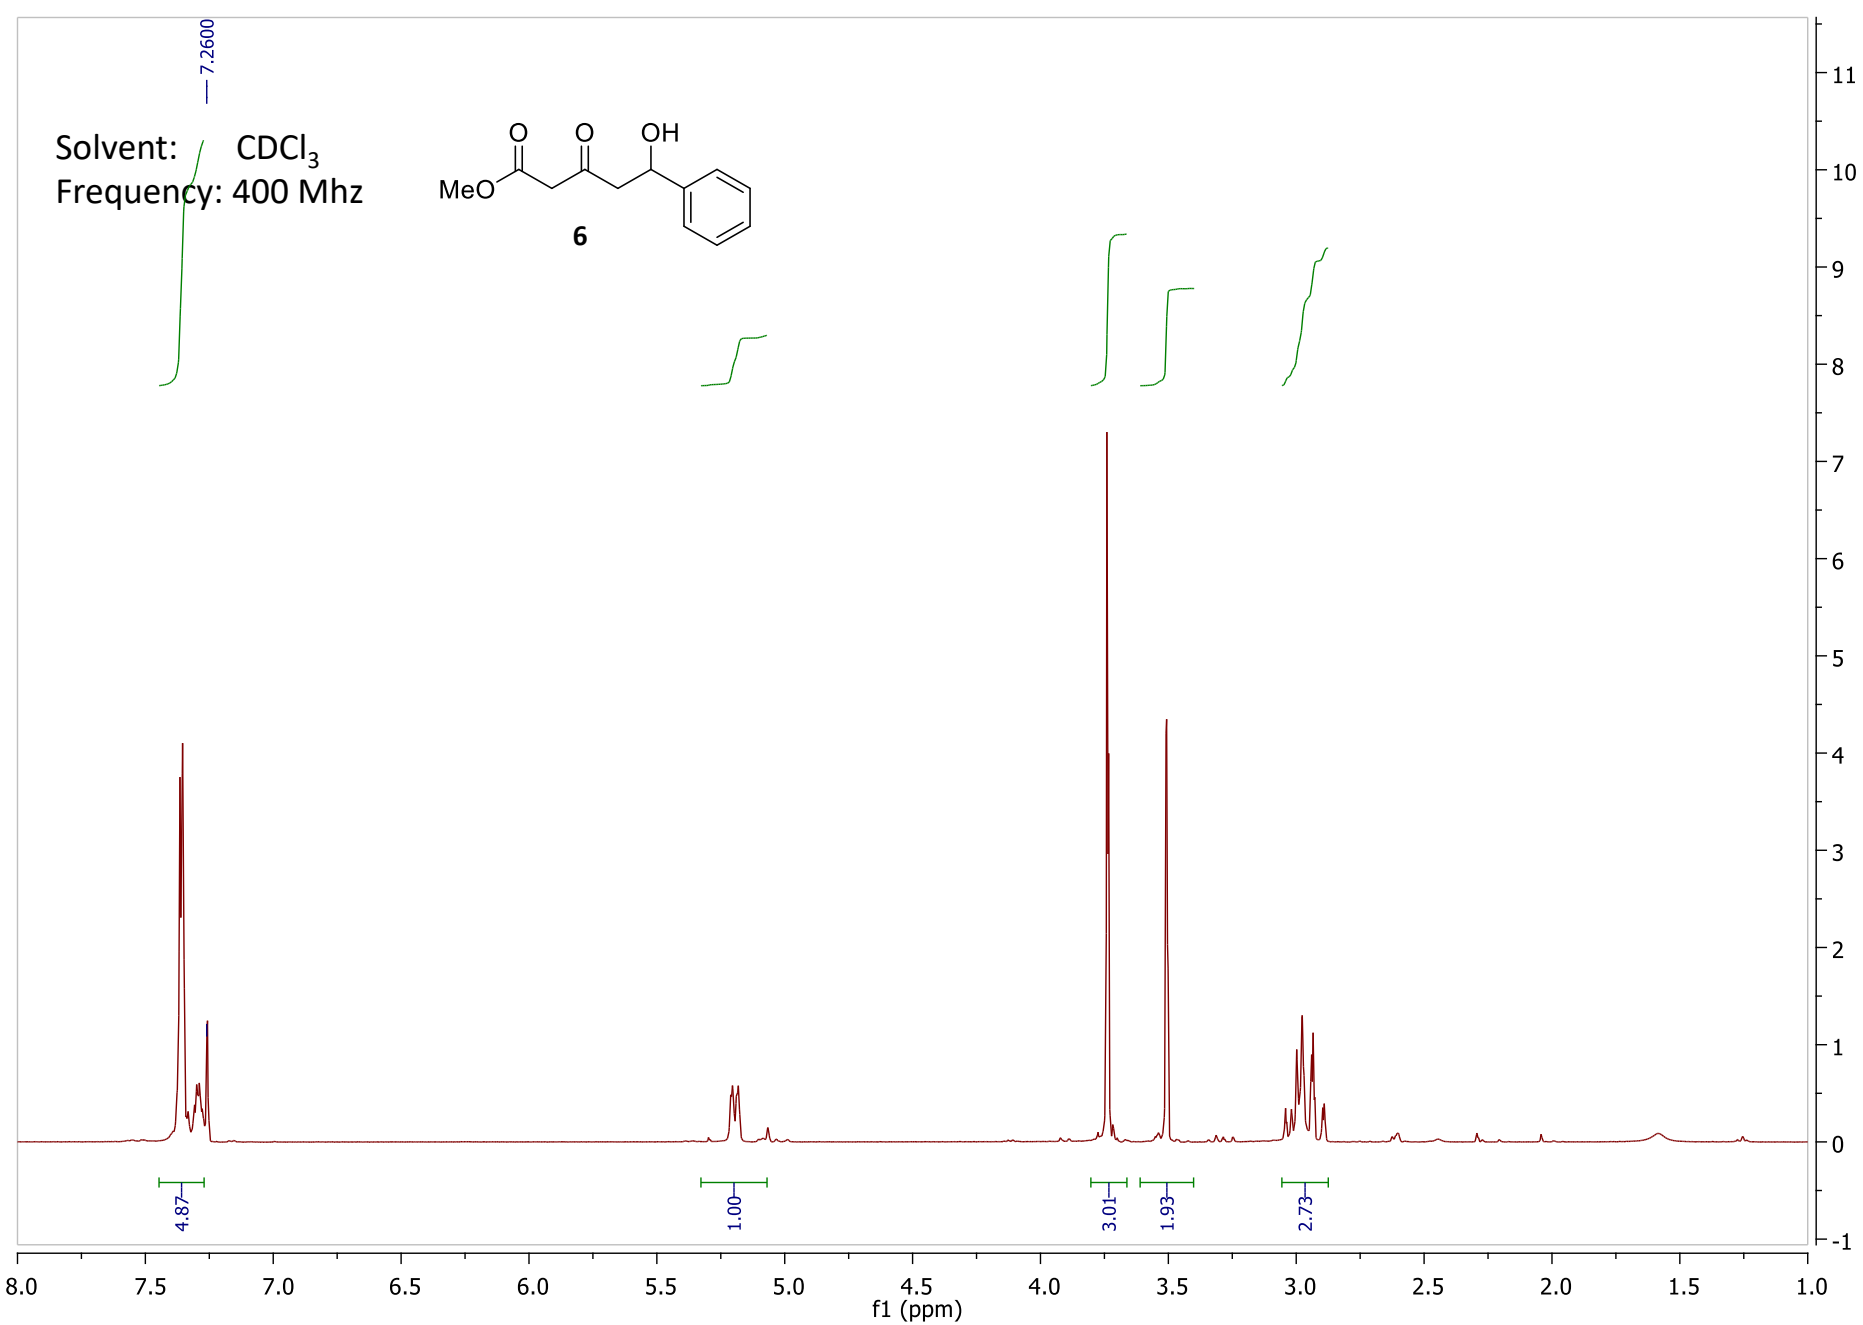

Solvent:  $\text{CDCl}_3$   
Frequency: 101 Mhz

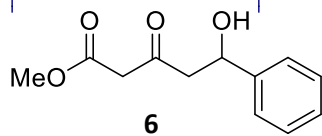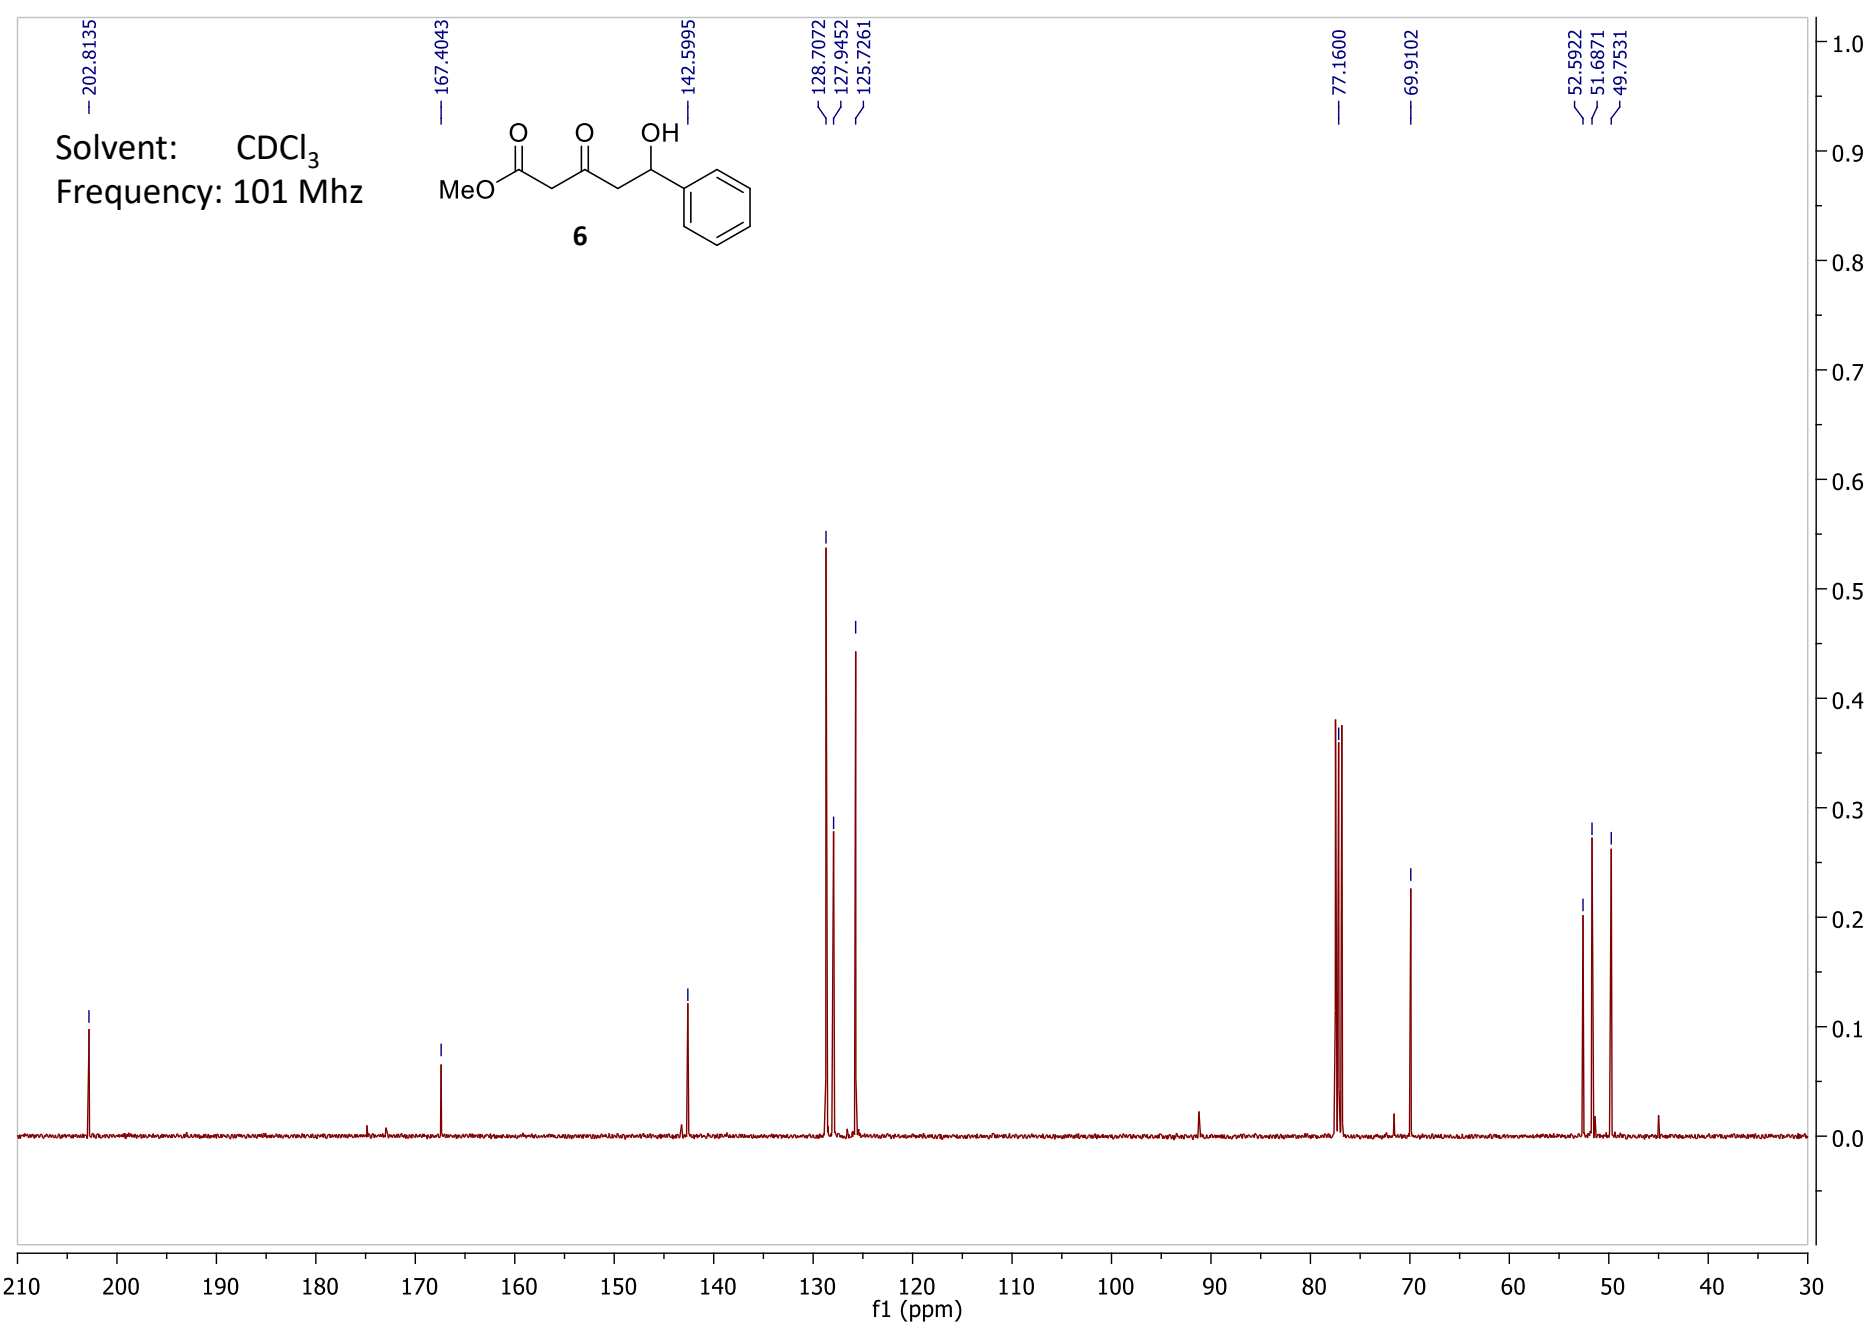

Solvent: CDCl<sub>3</sub>  
Frequency: 400 Mhz

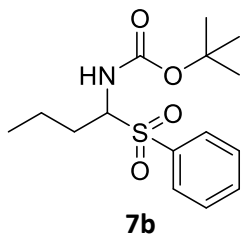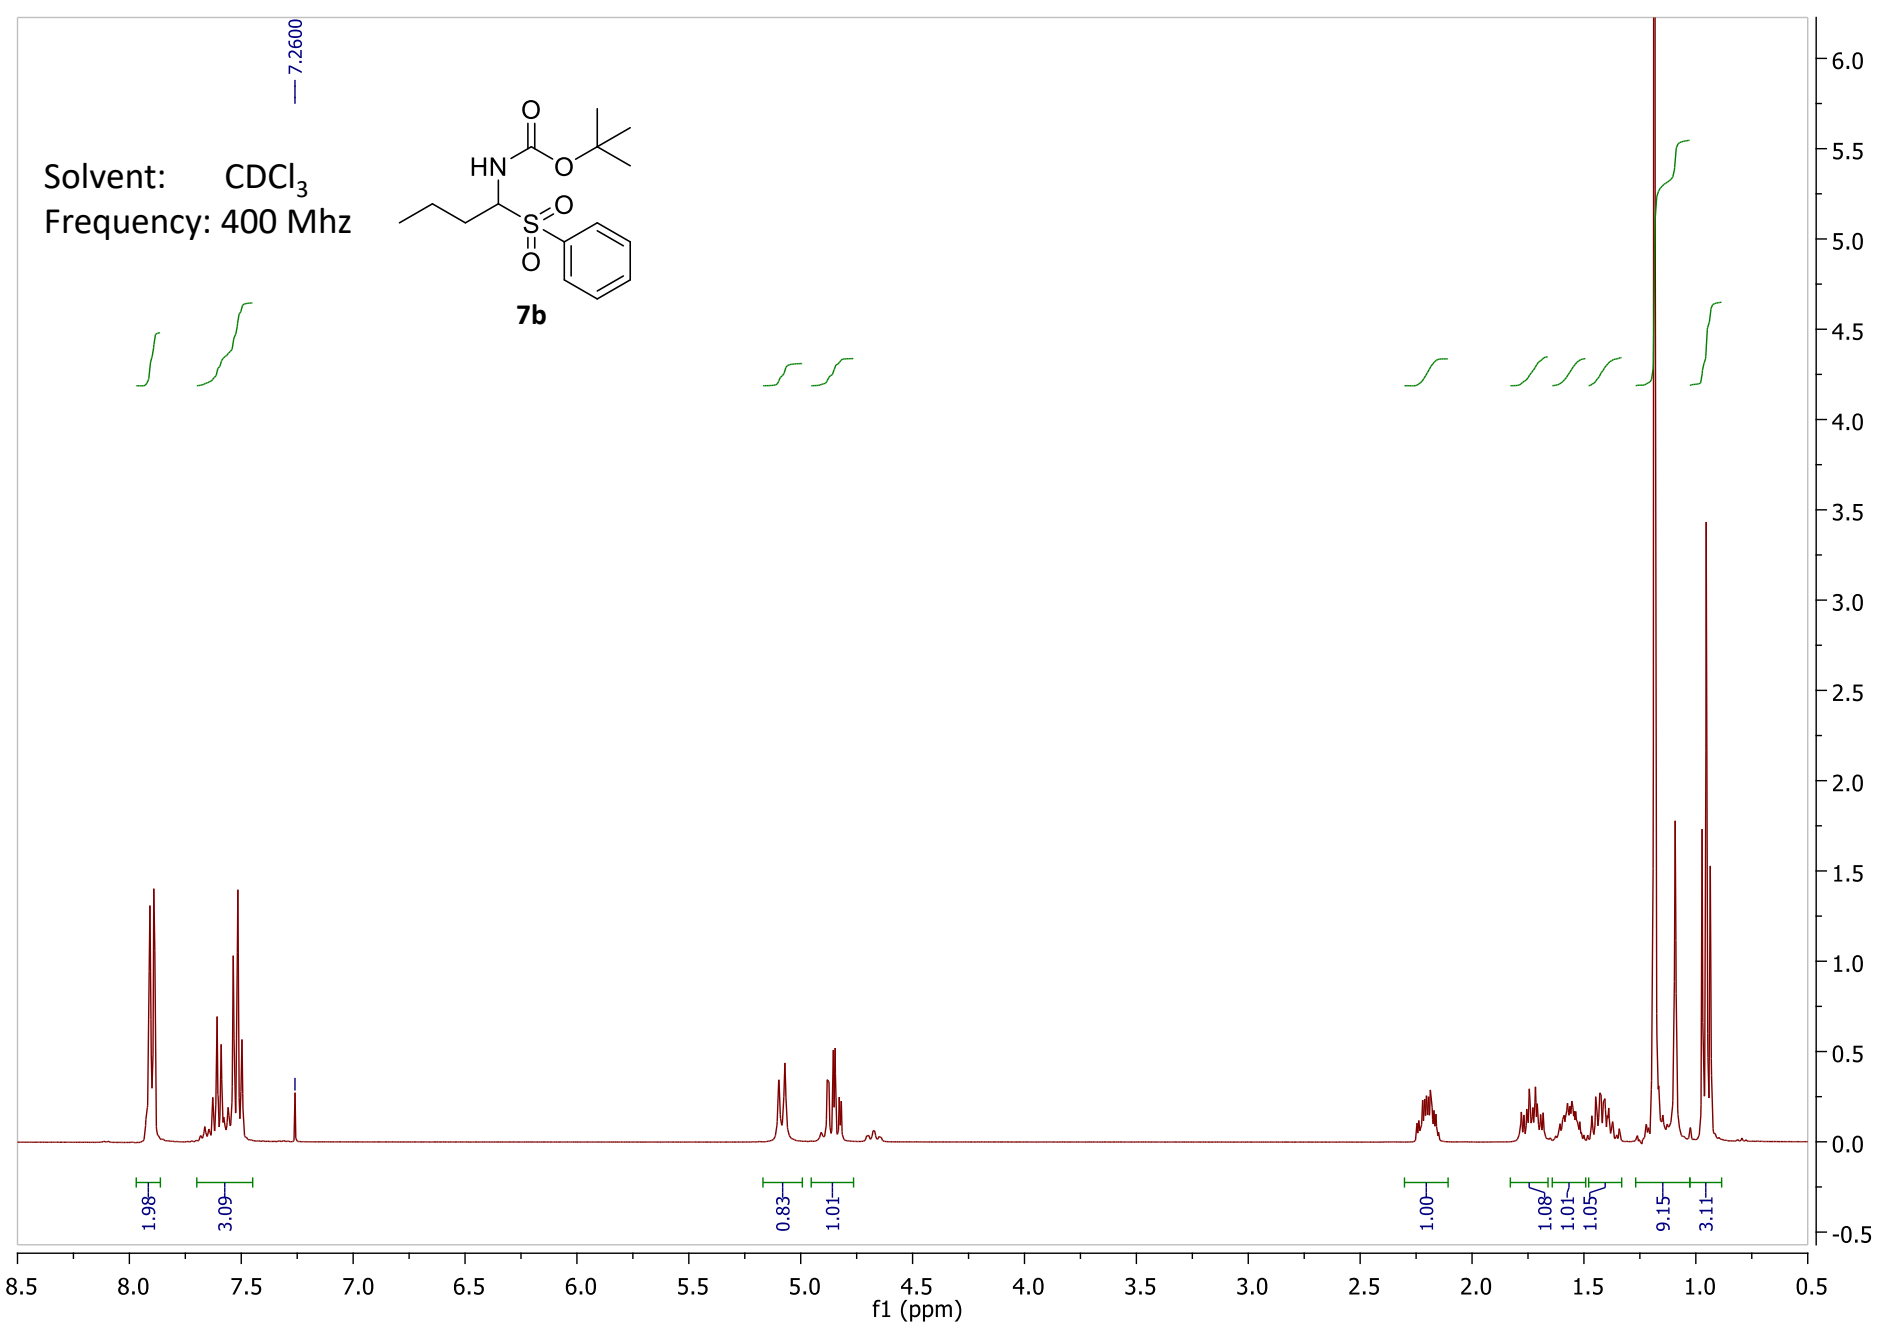

Solvent:  $\text{CDCl}_3$   
Frequency: 101 Mhz

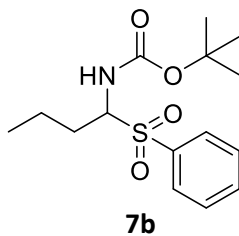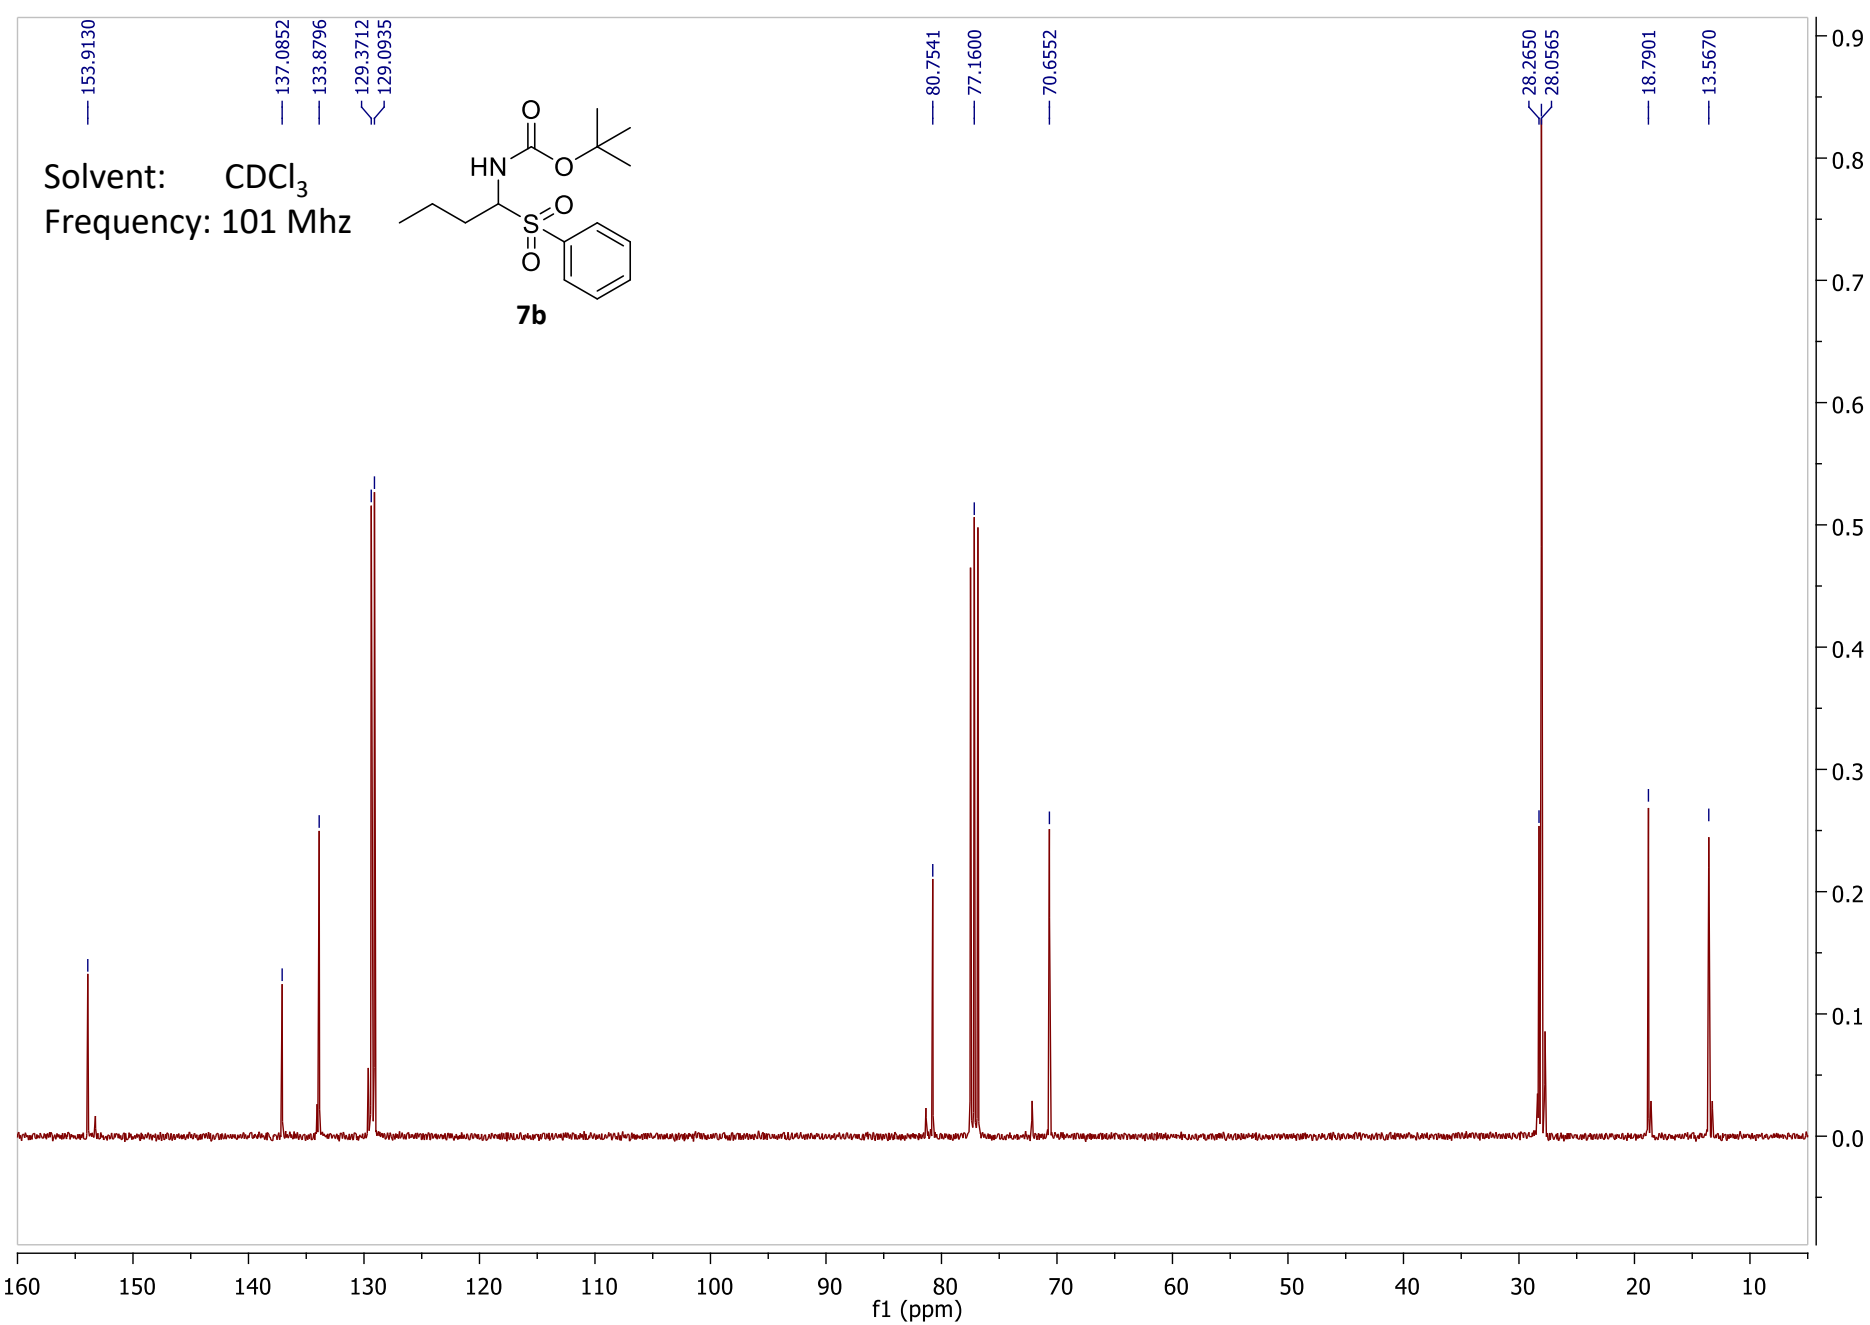

Solvent: CDCl<sub>3</sub>  
Frequency: 400 Mhz

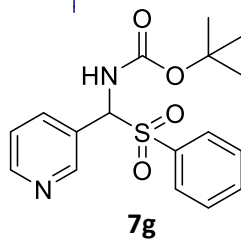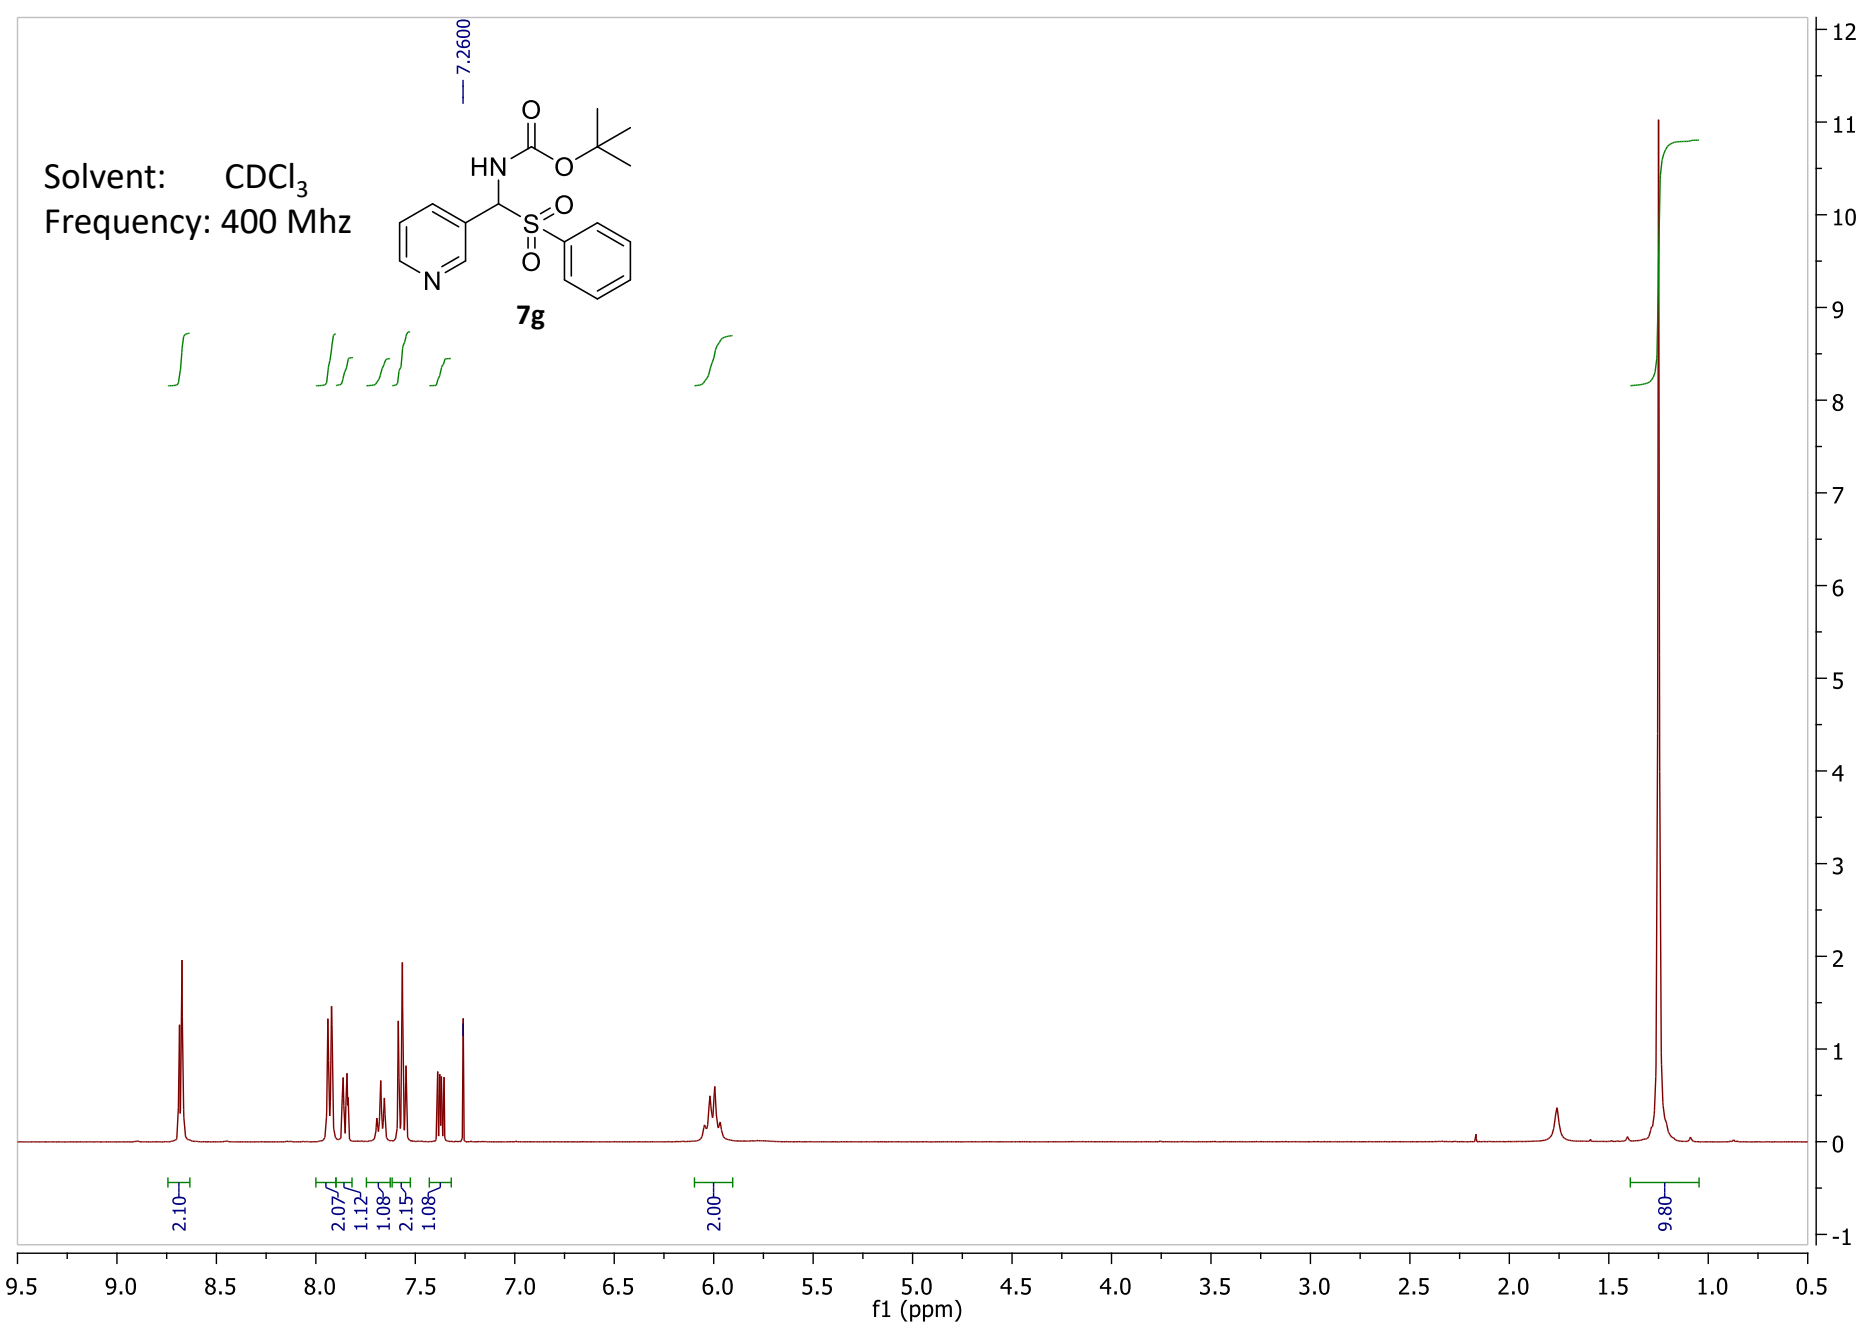



Solvent: CDCl<sub>3</sub>  
Frequency: 101 Mhz

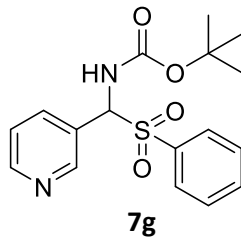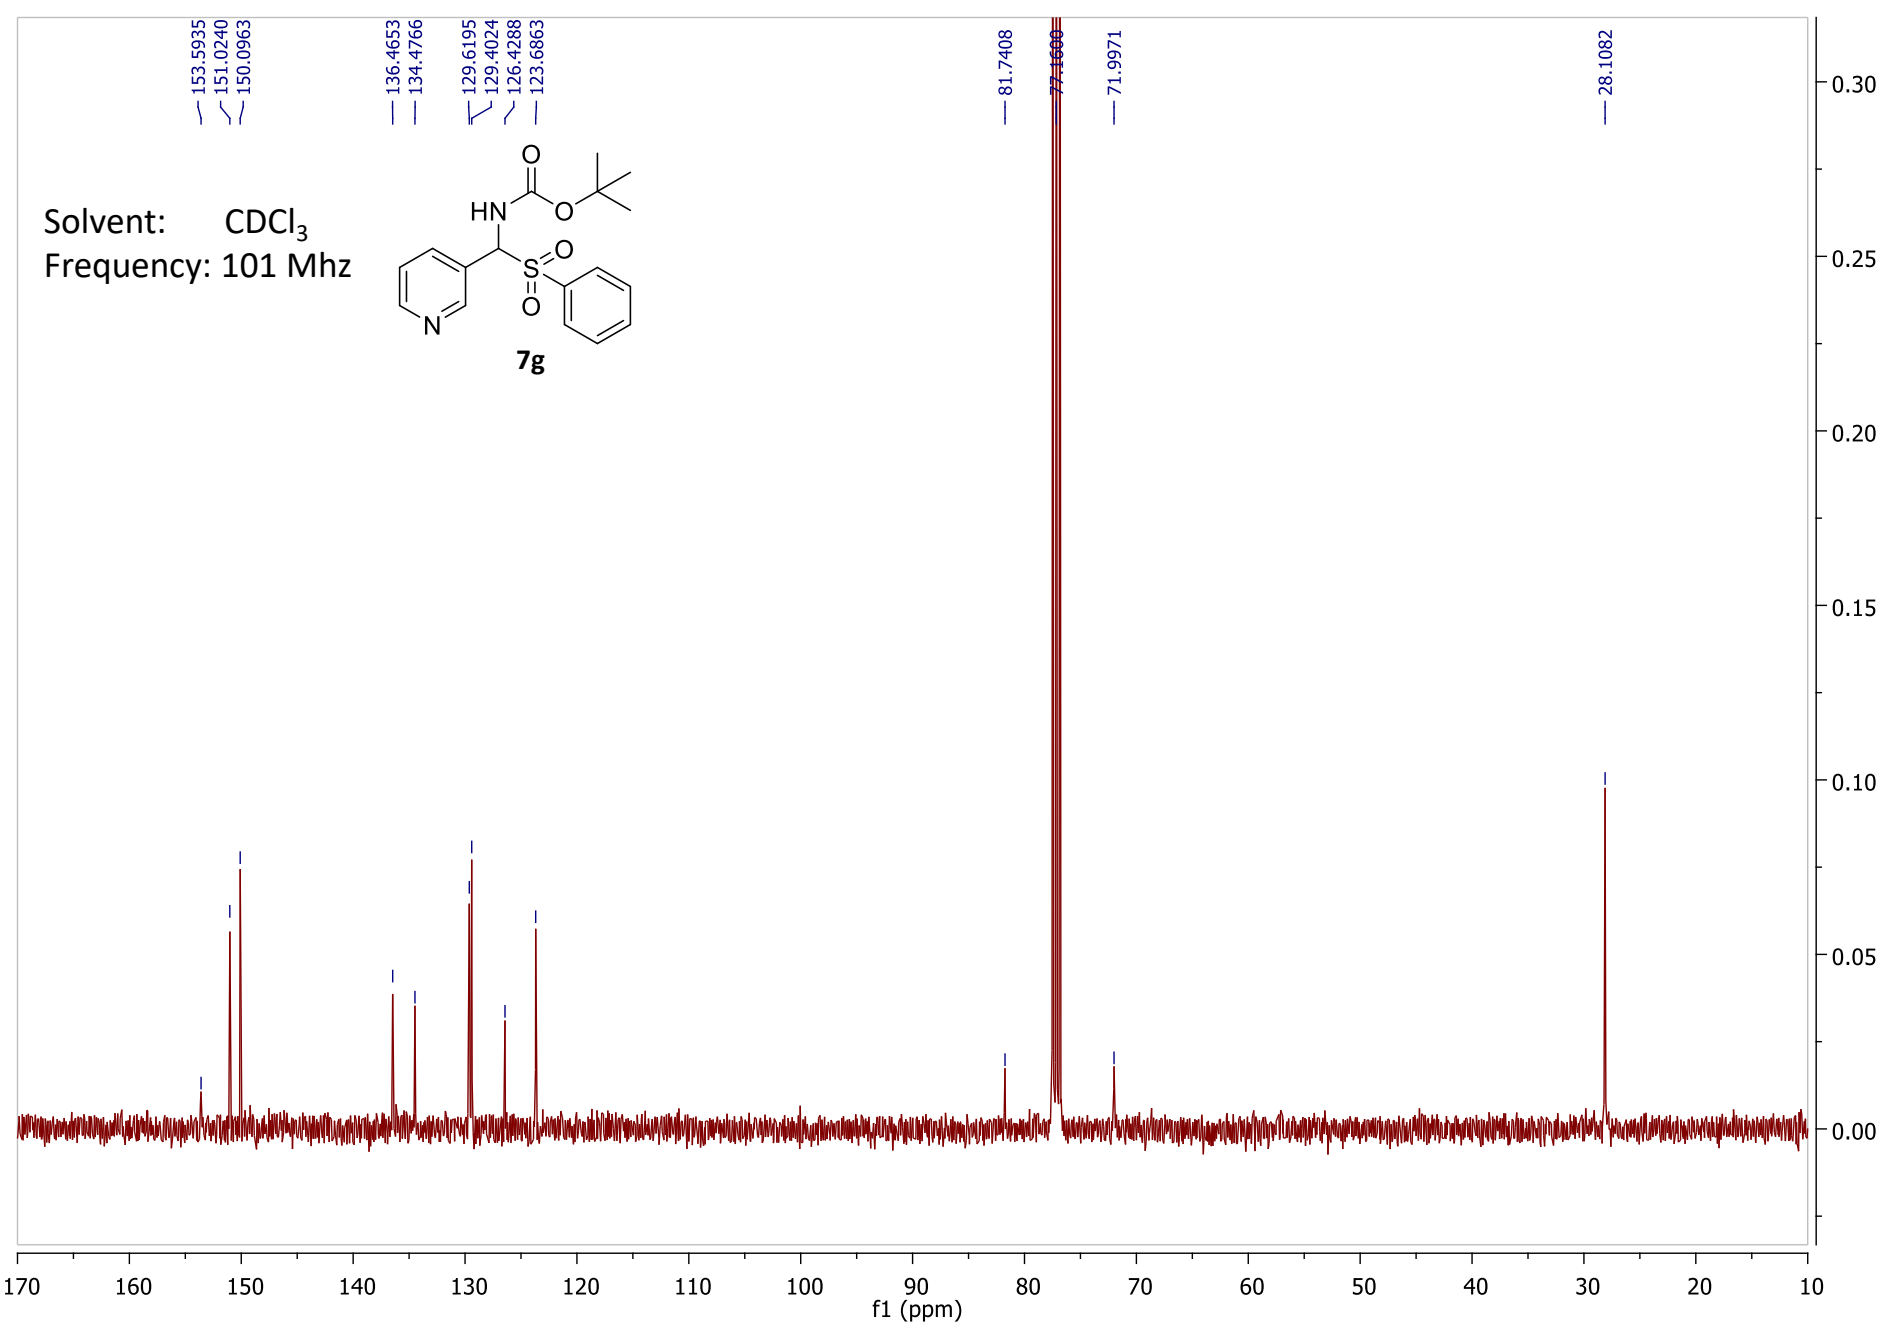

Solvent:  $\text{CDCl}_3$   
Frequency: 400 Mhz

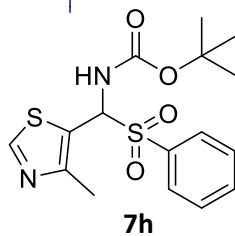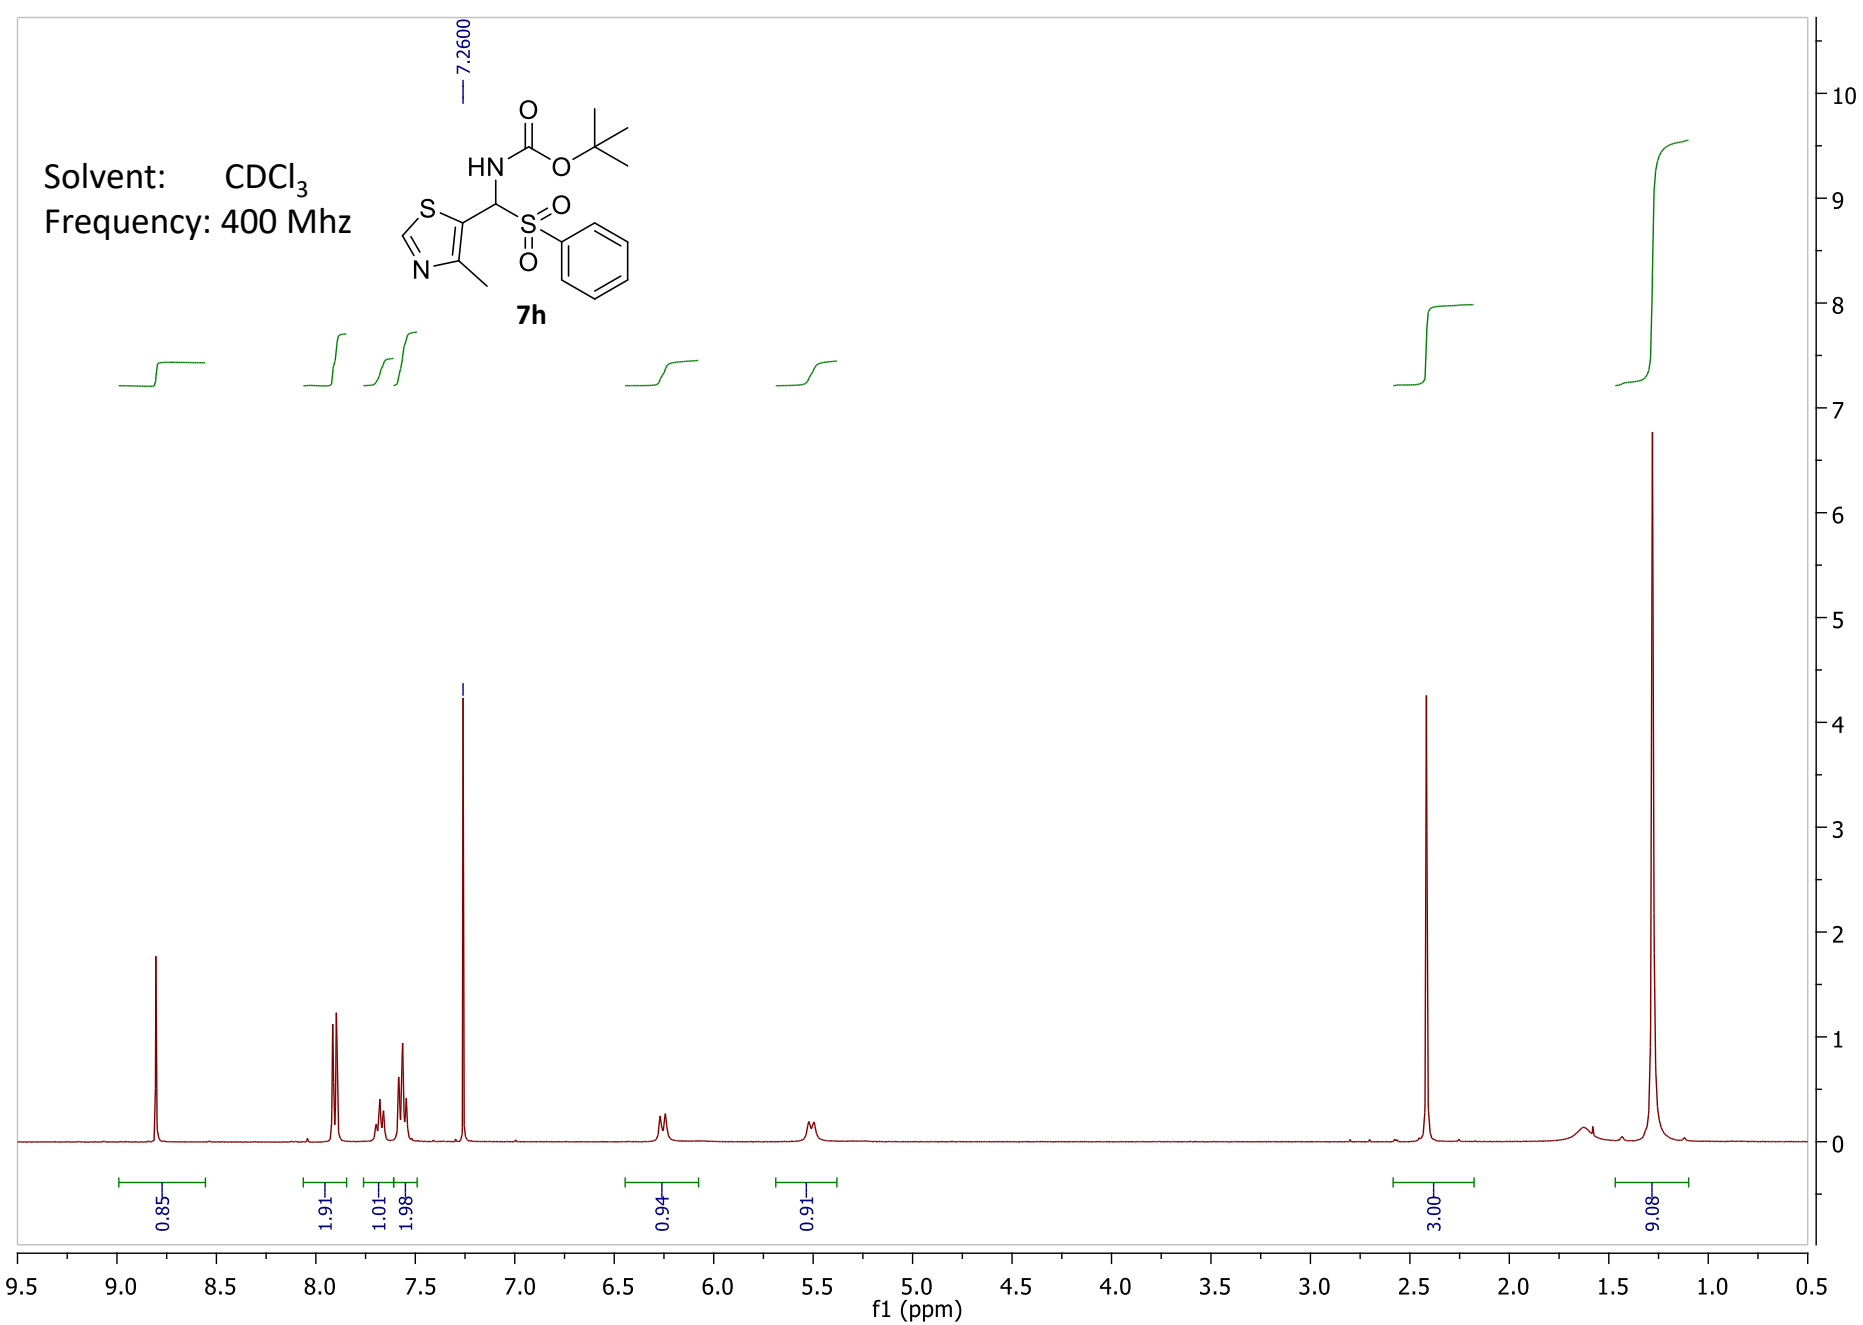

Solvent: CDCl<sub>3</sub>  
Frequency: 101 Mhz

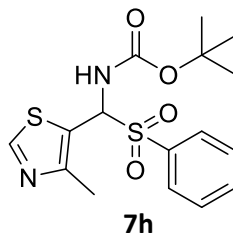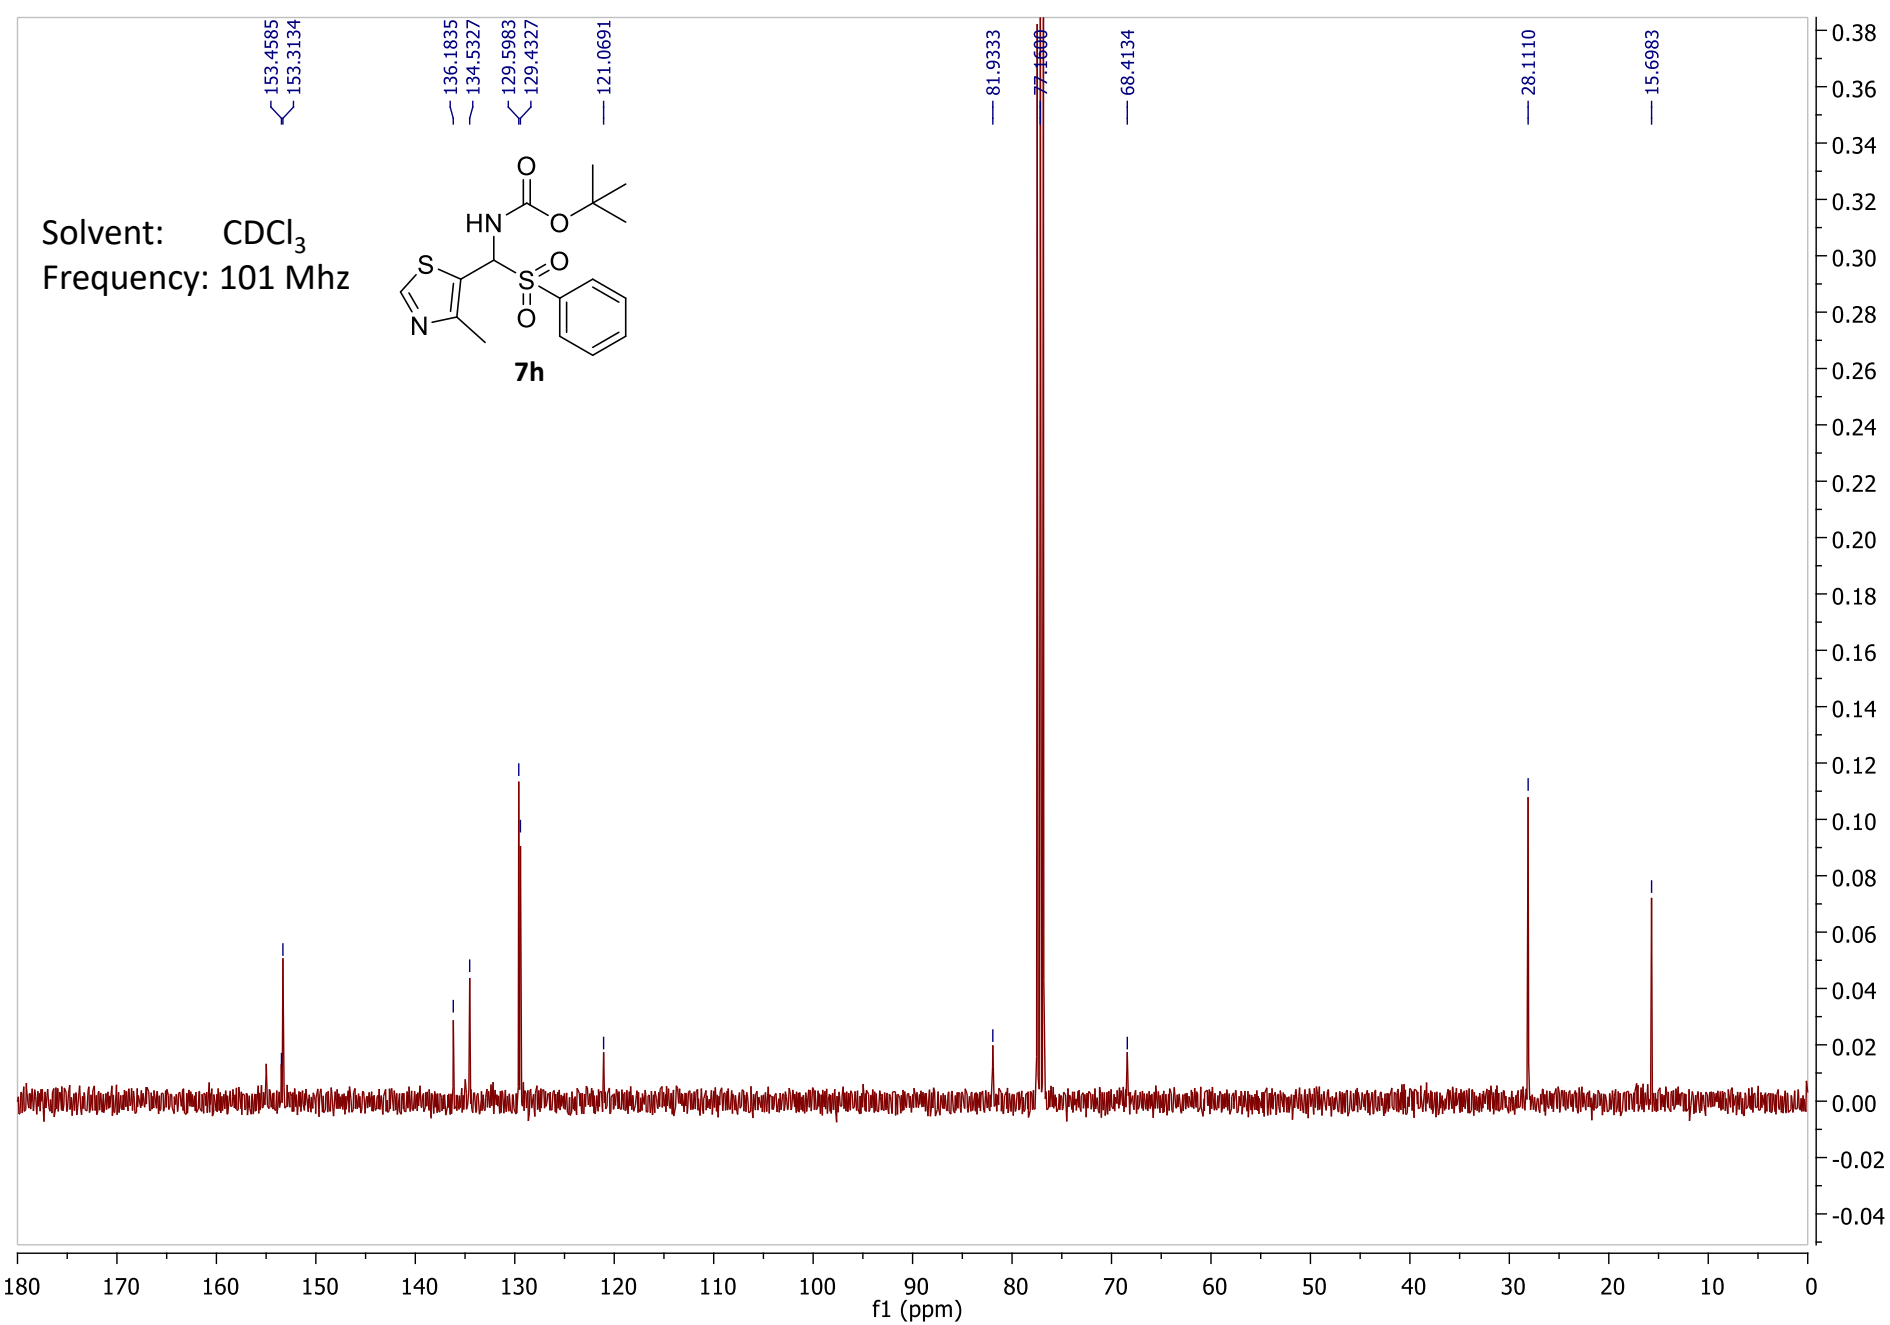

Solvent: CDCl<sub>3</sub>  
Frequency: 400 Mhz

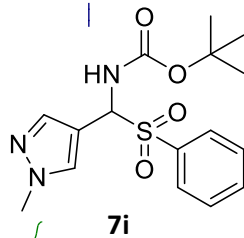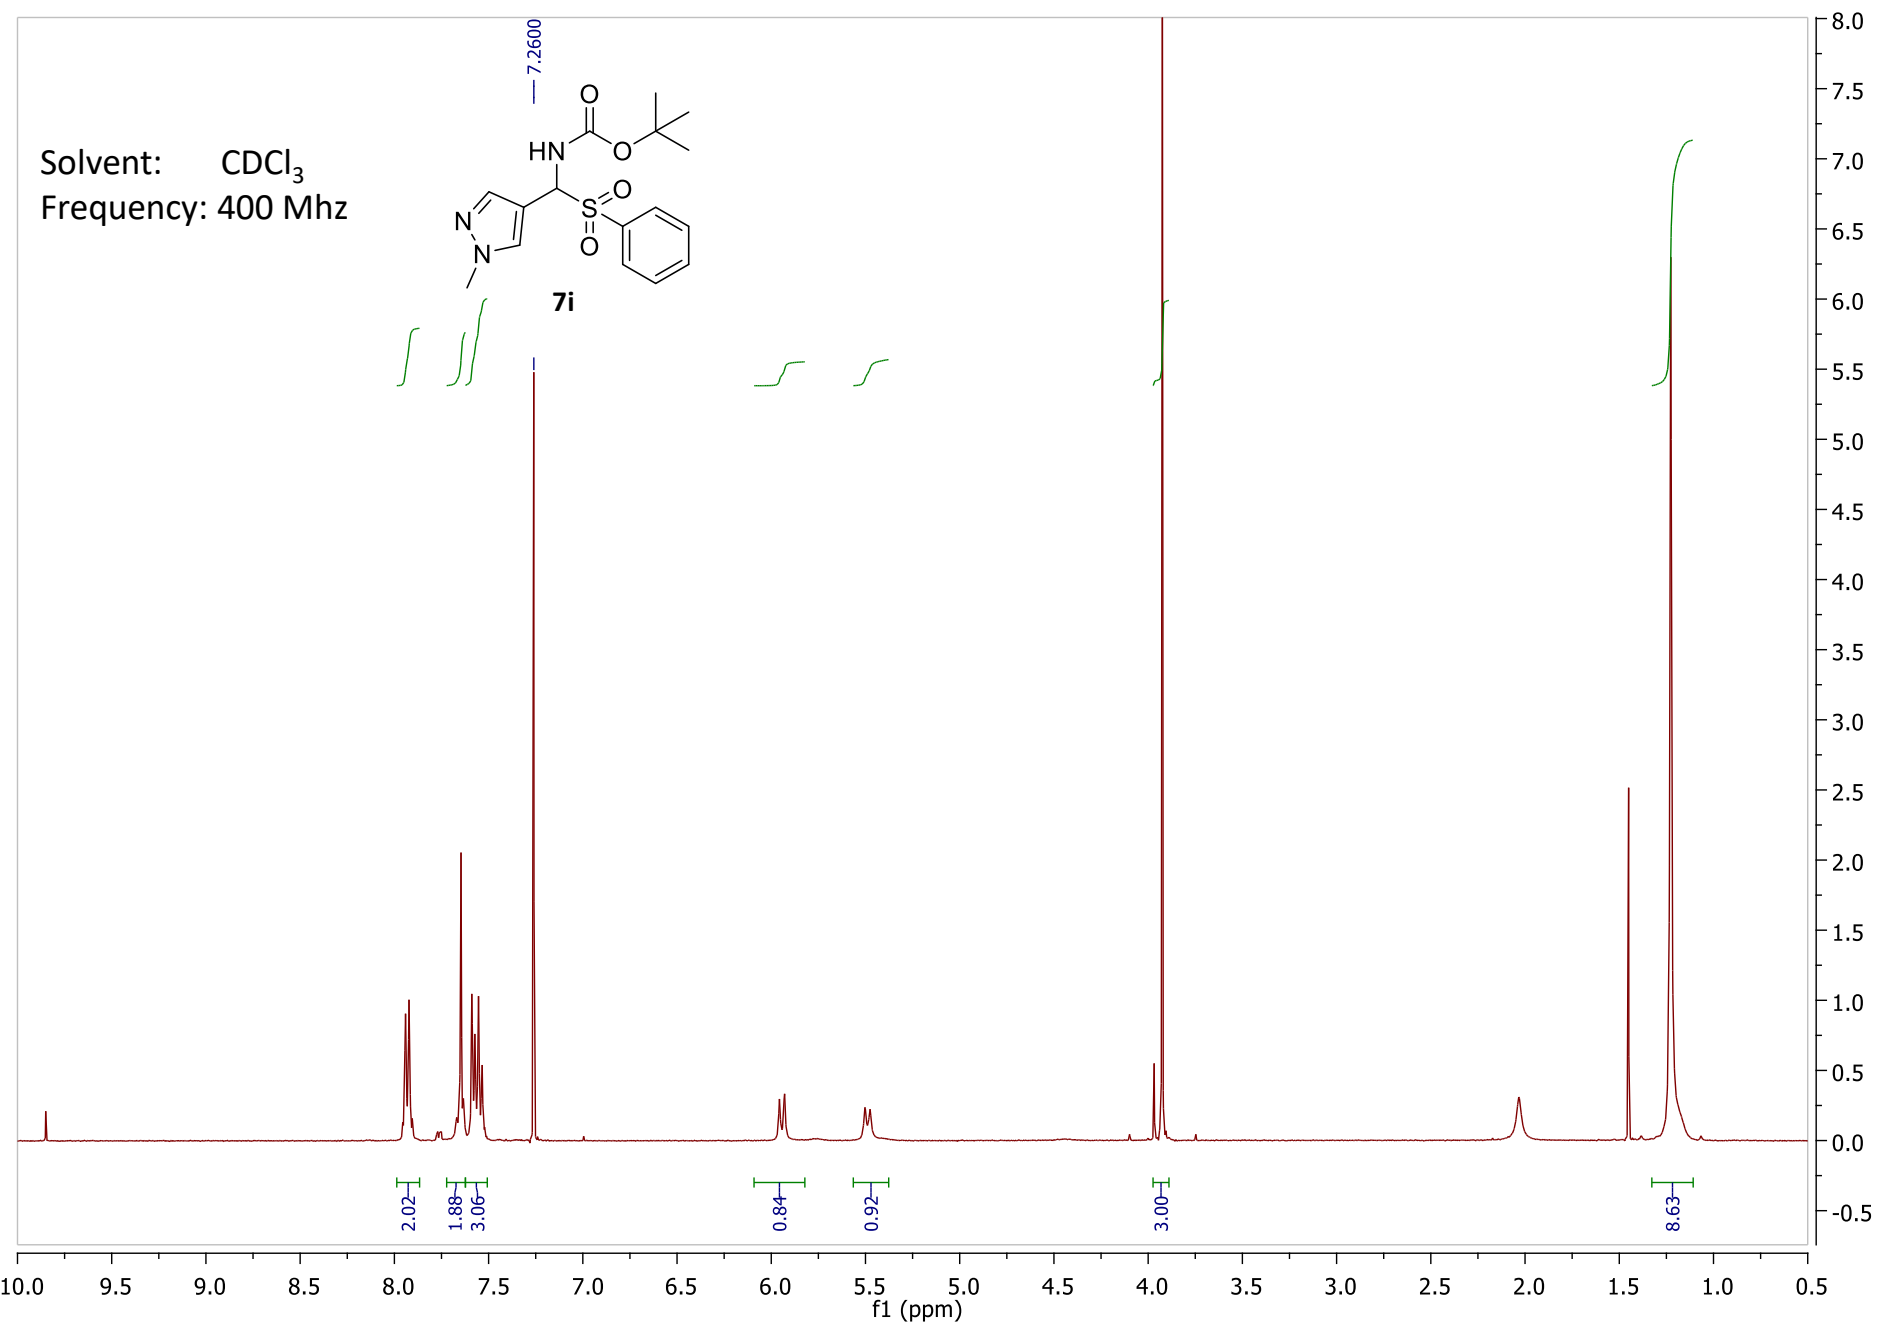

Solvent:  $\text{CDCl}_3$   
Frequency: 101 Mhz

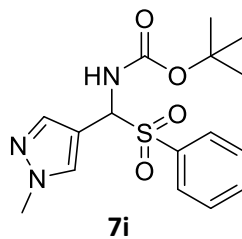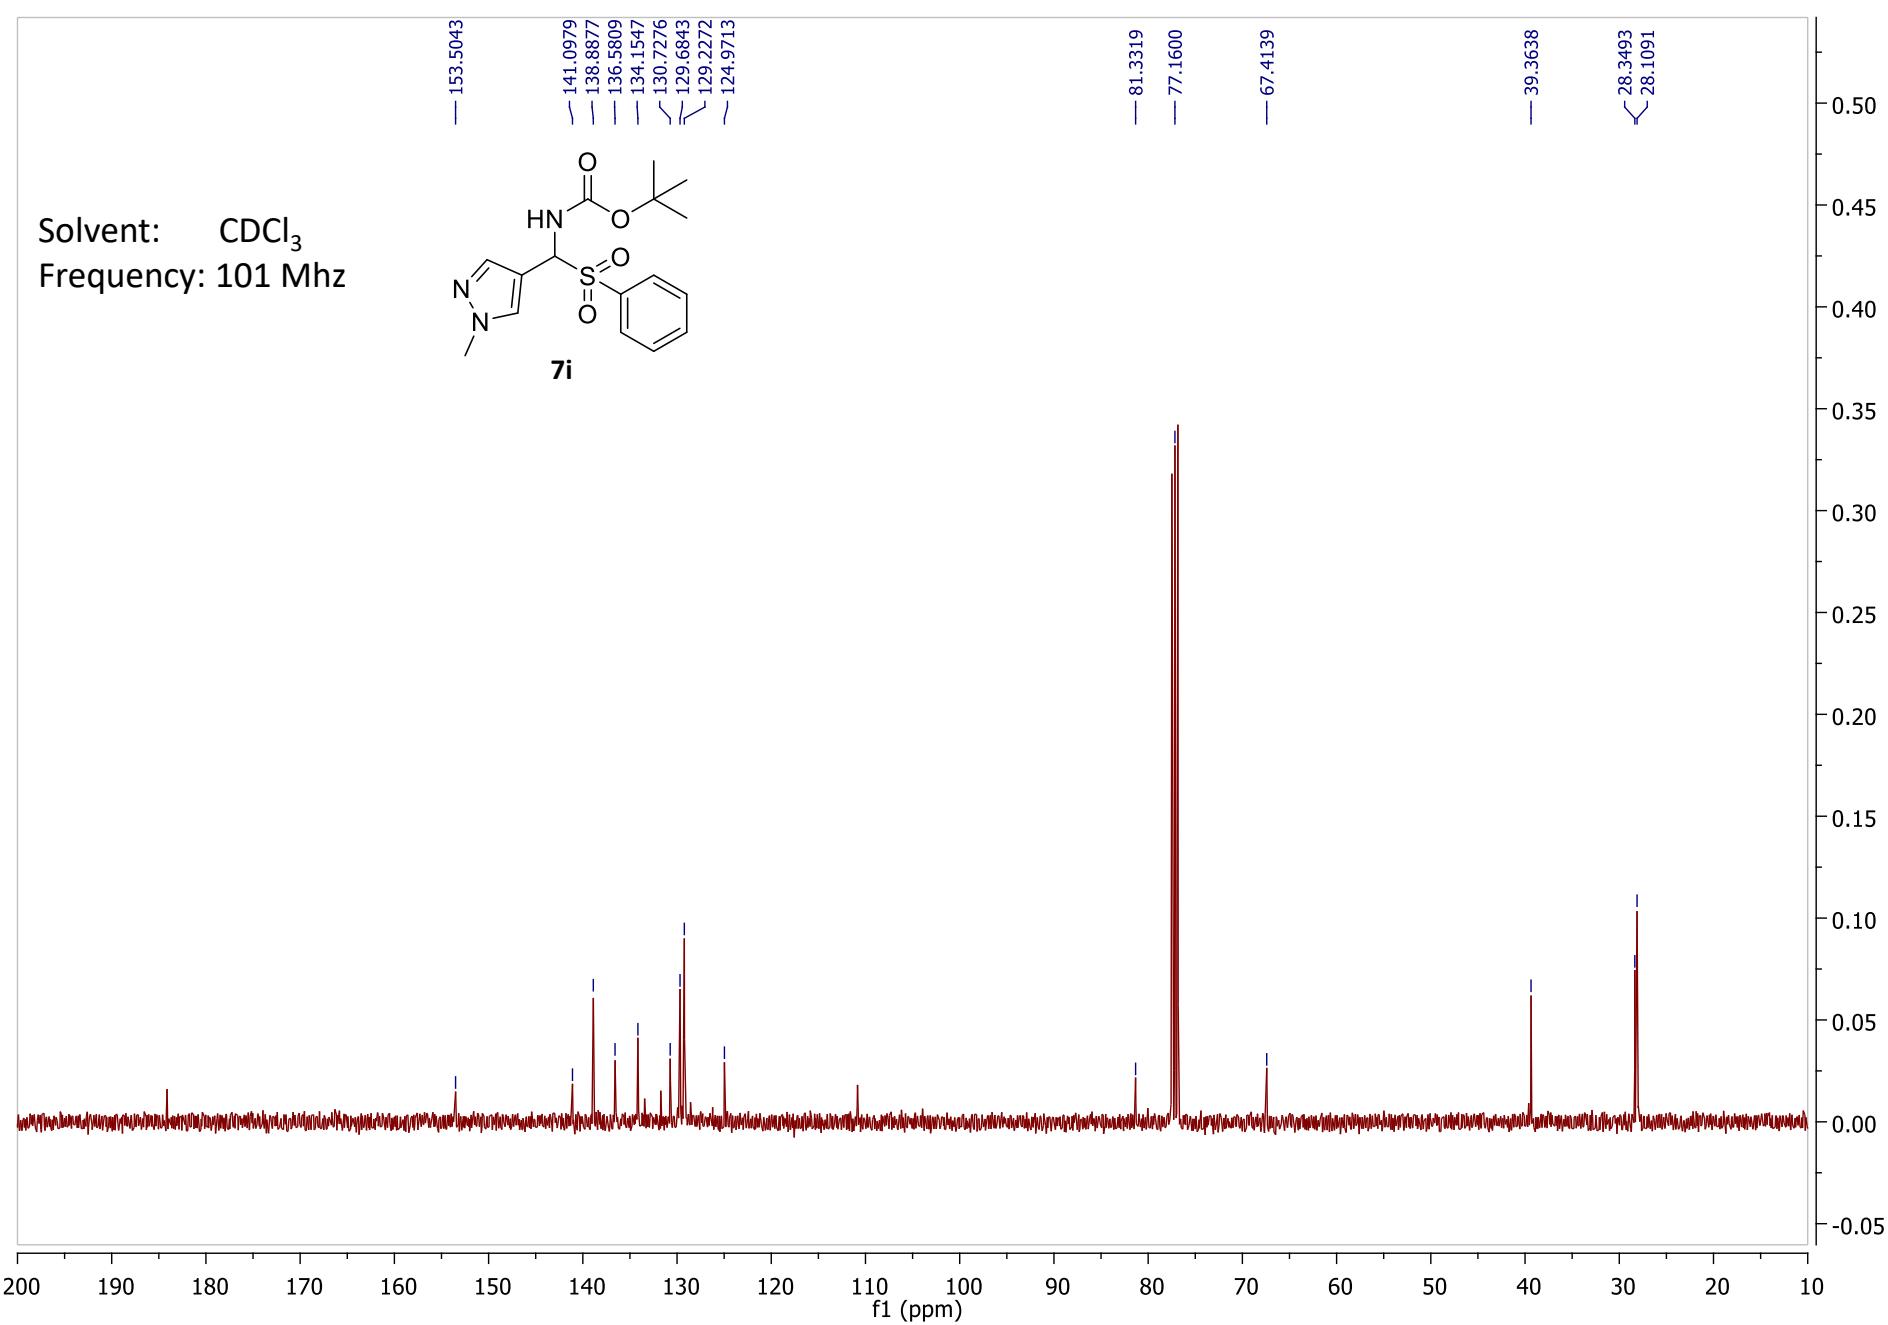

Solvent: CDCl<sub>3</sub>  
Frequency: 400 Mhz

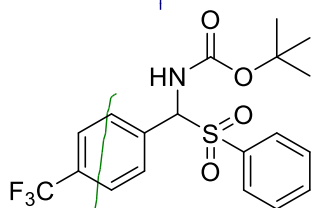

**7k**

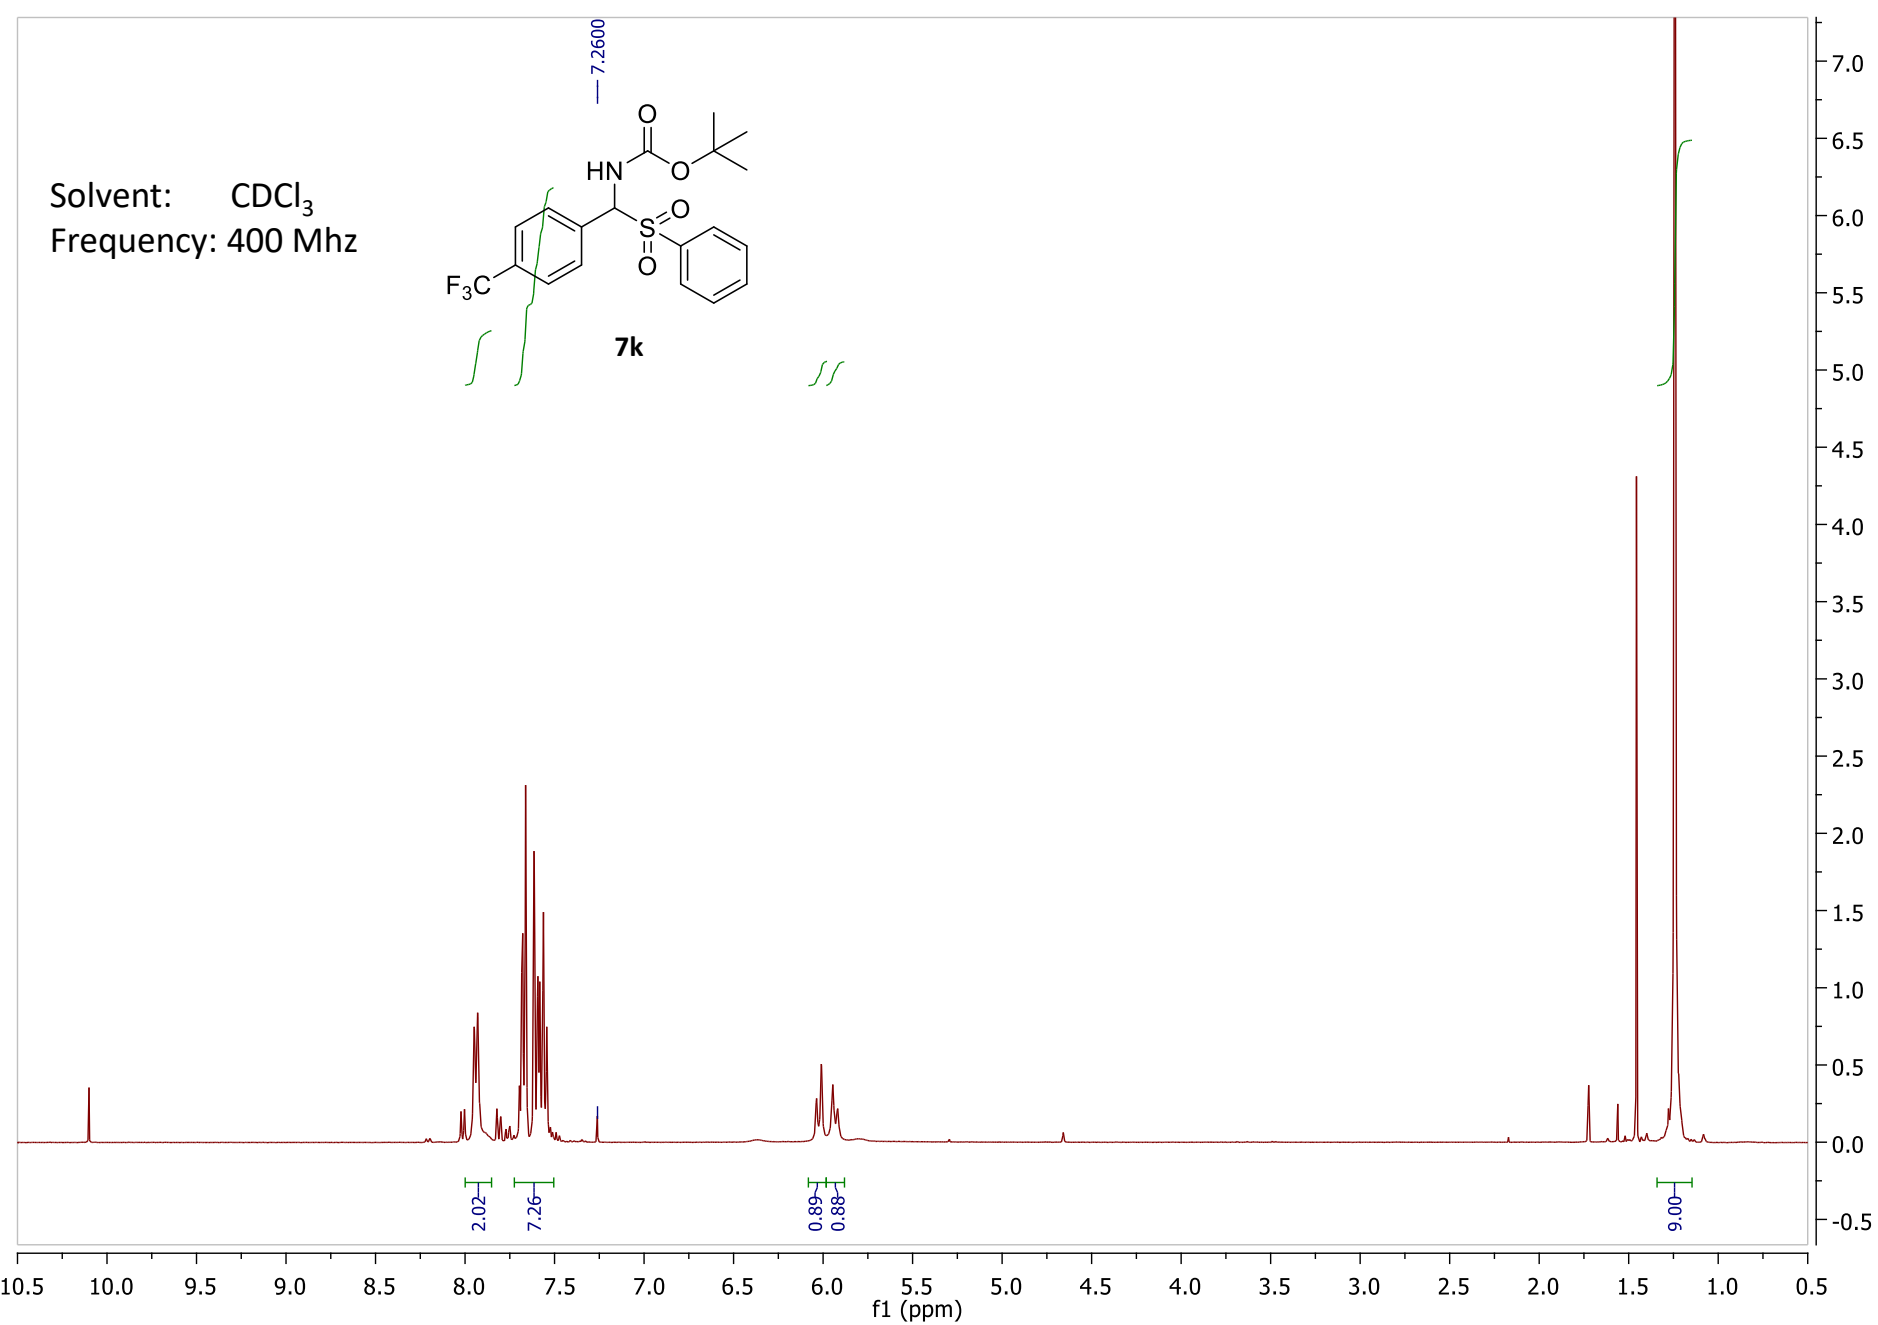

Solvent:  $\text{CDCl}_3$   
Frequency: 101 Mhz

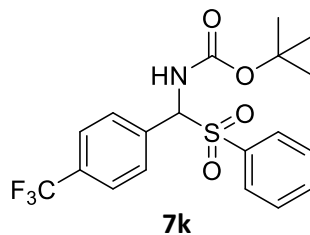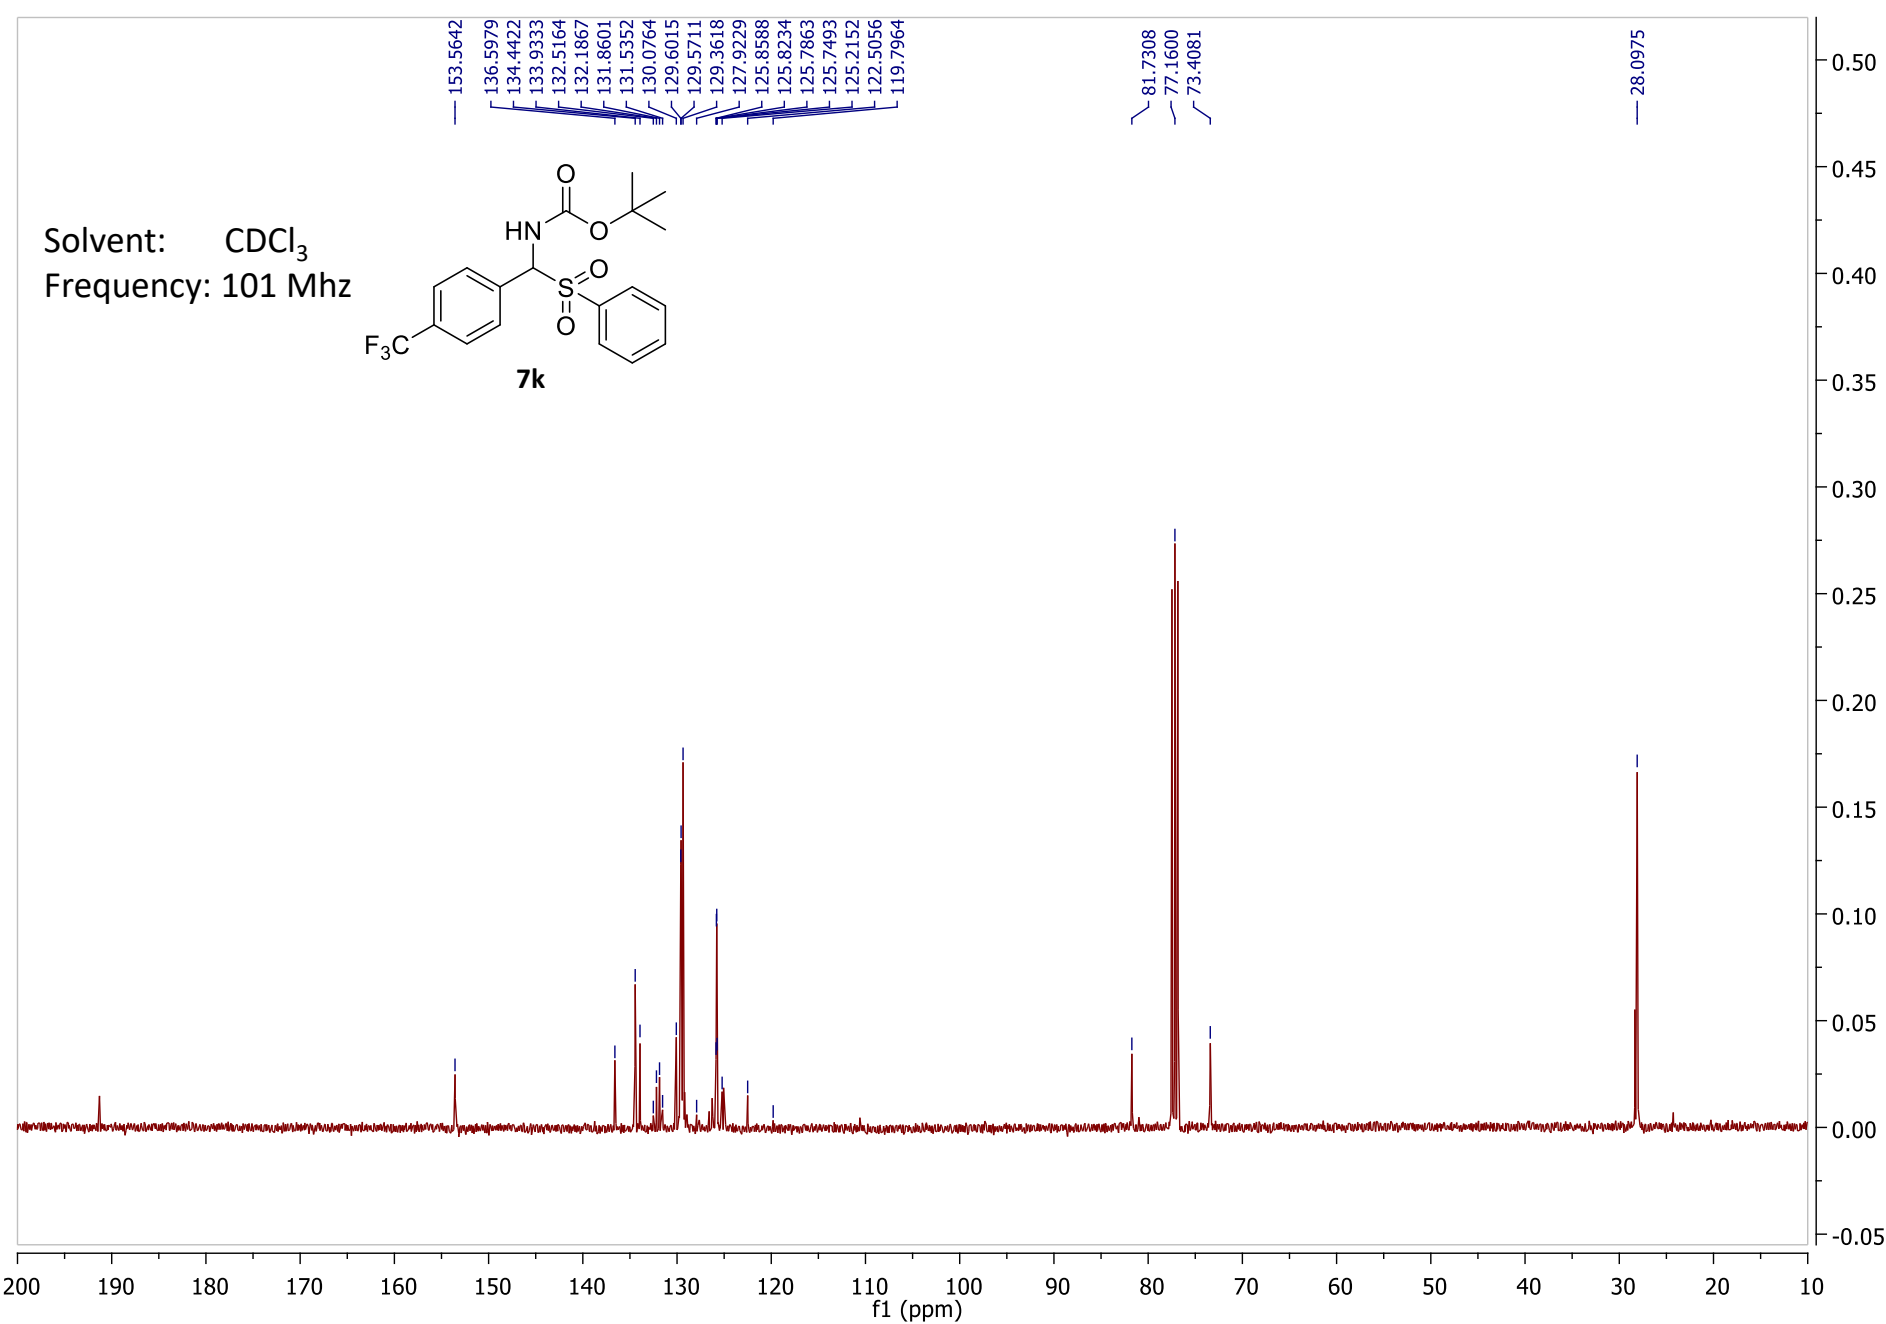

Solvent: CDCl<sub>3</sub>  
Frequency: 400 Mhz

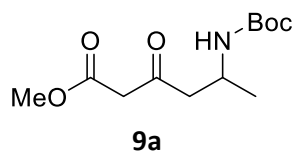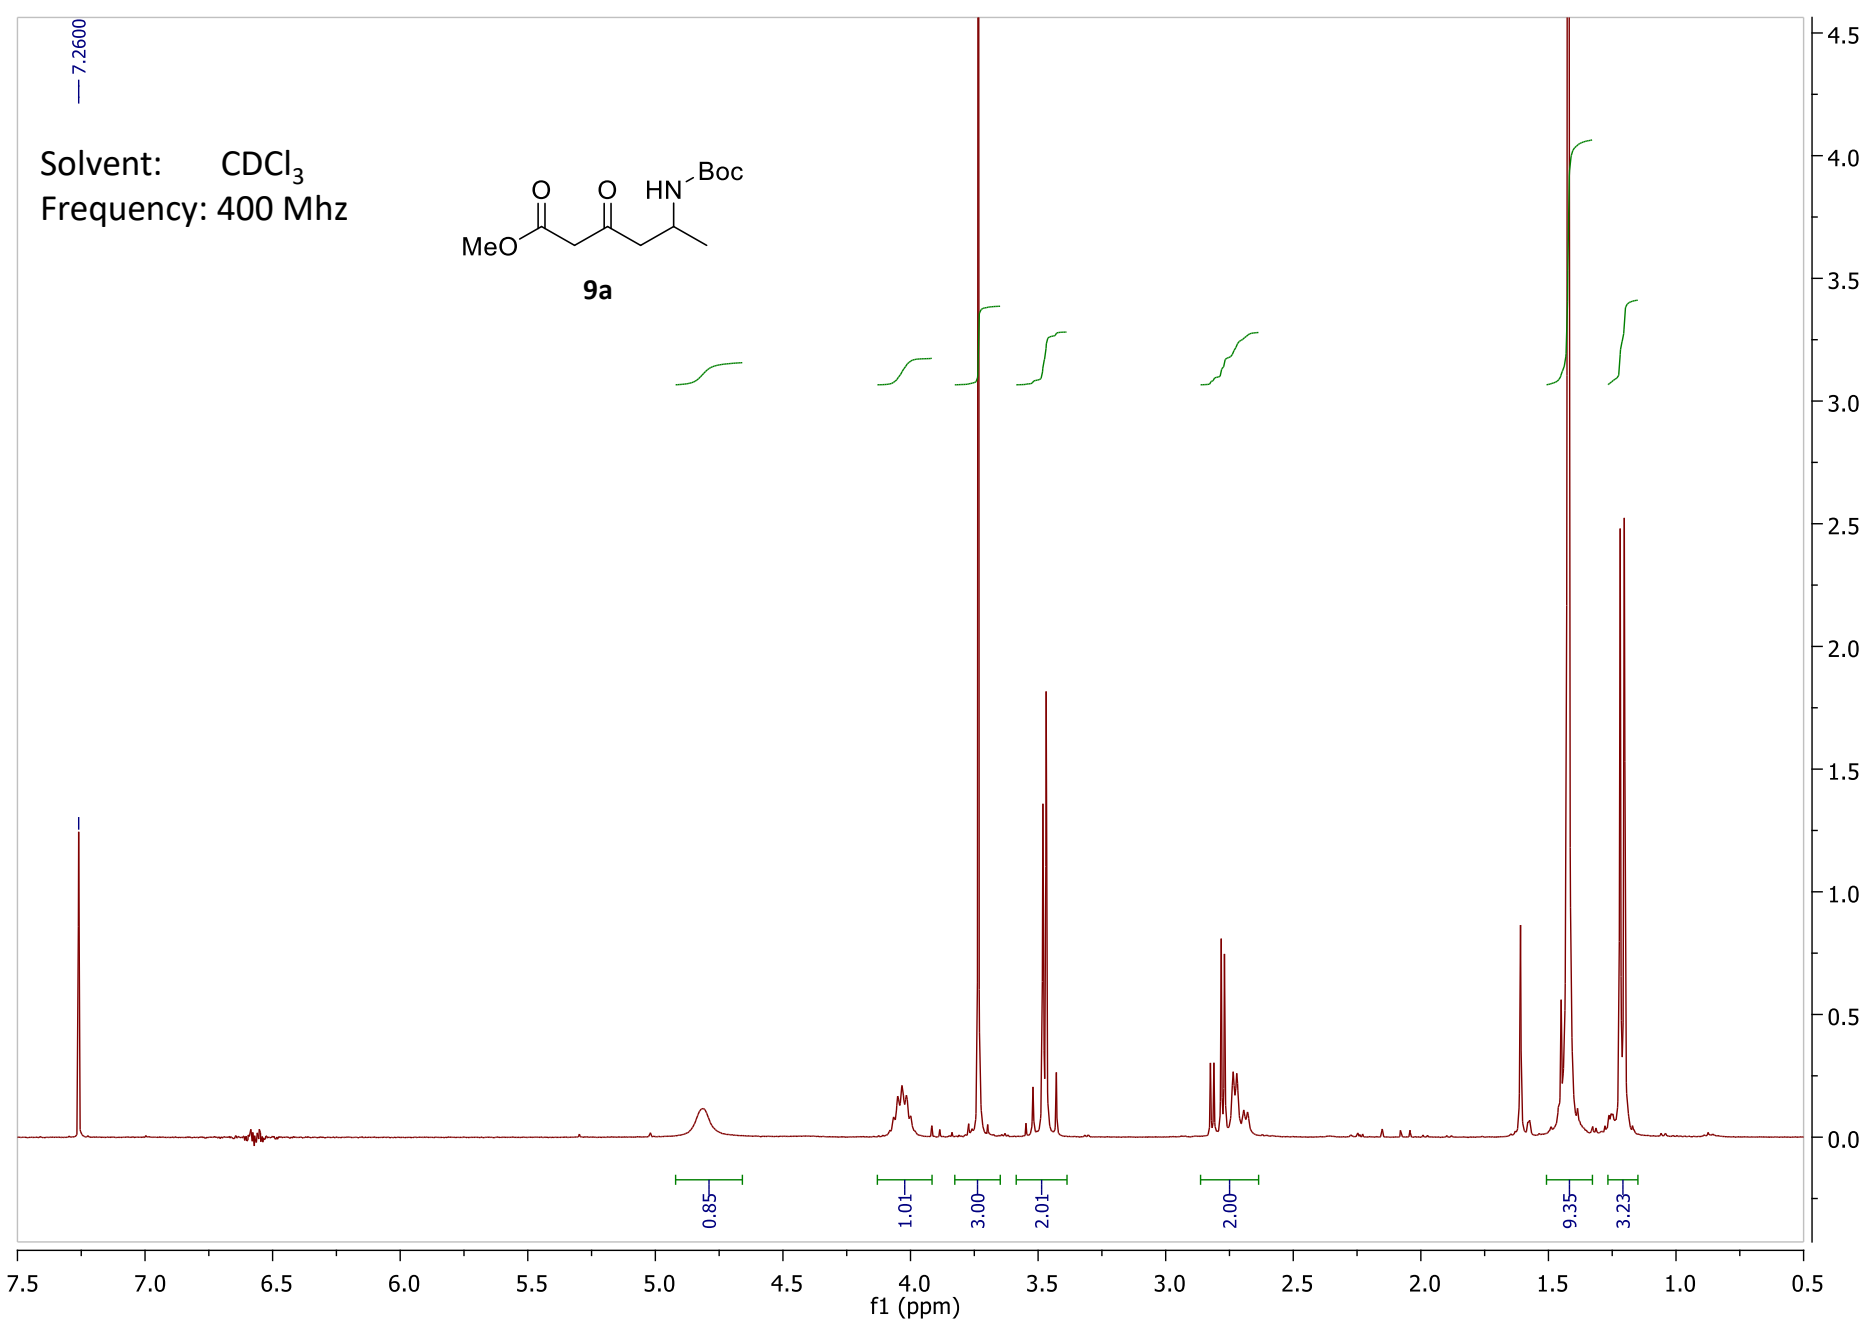



Solvent: CDCl<sub>3</sub>  
Frequency: 101 Mhz

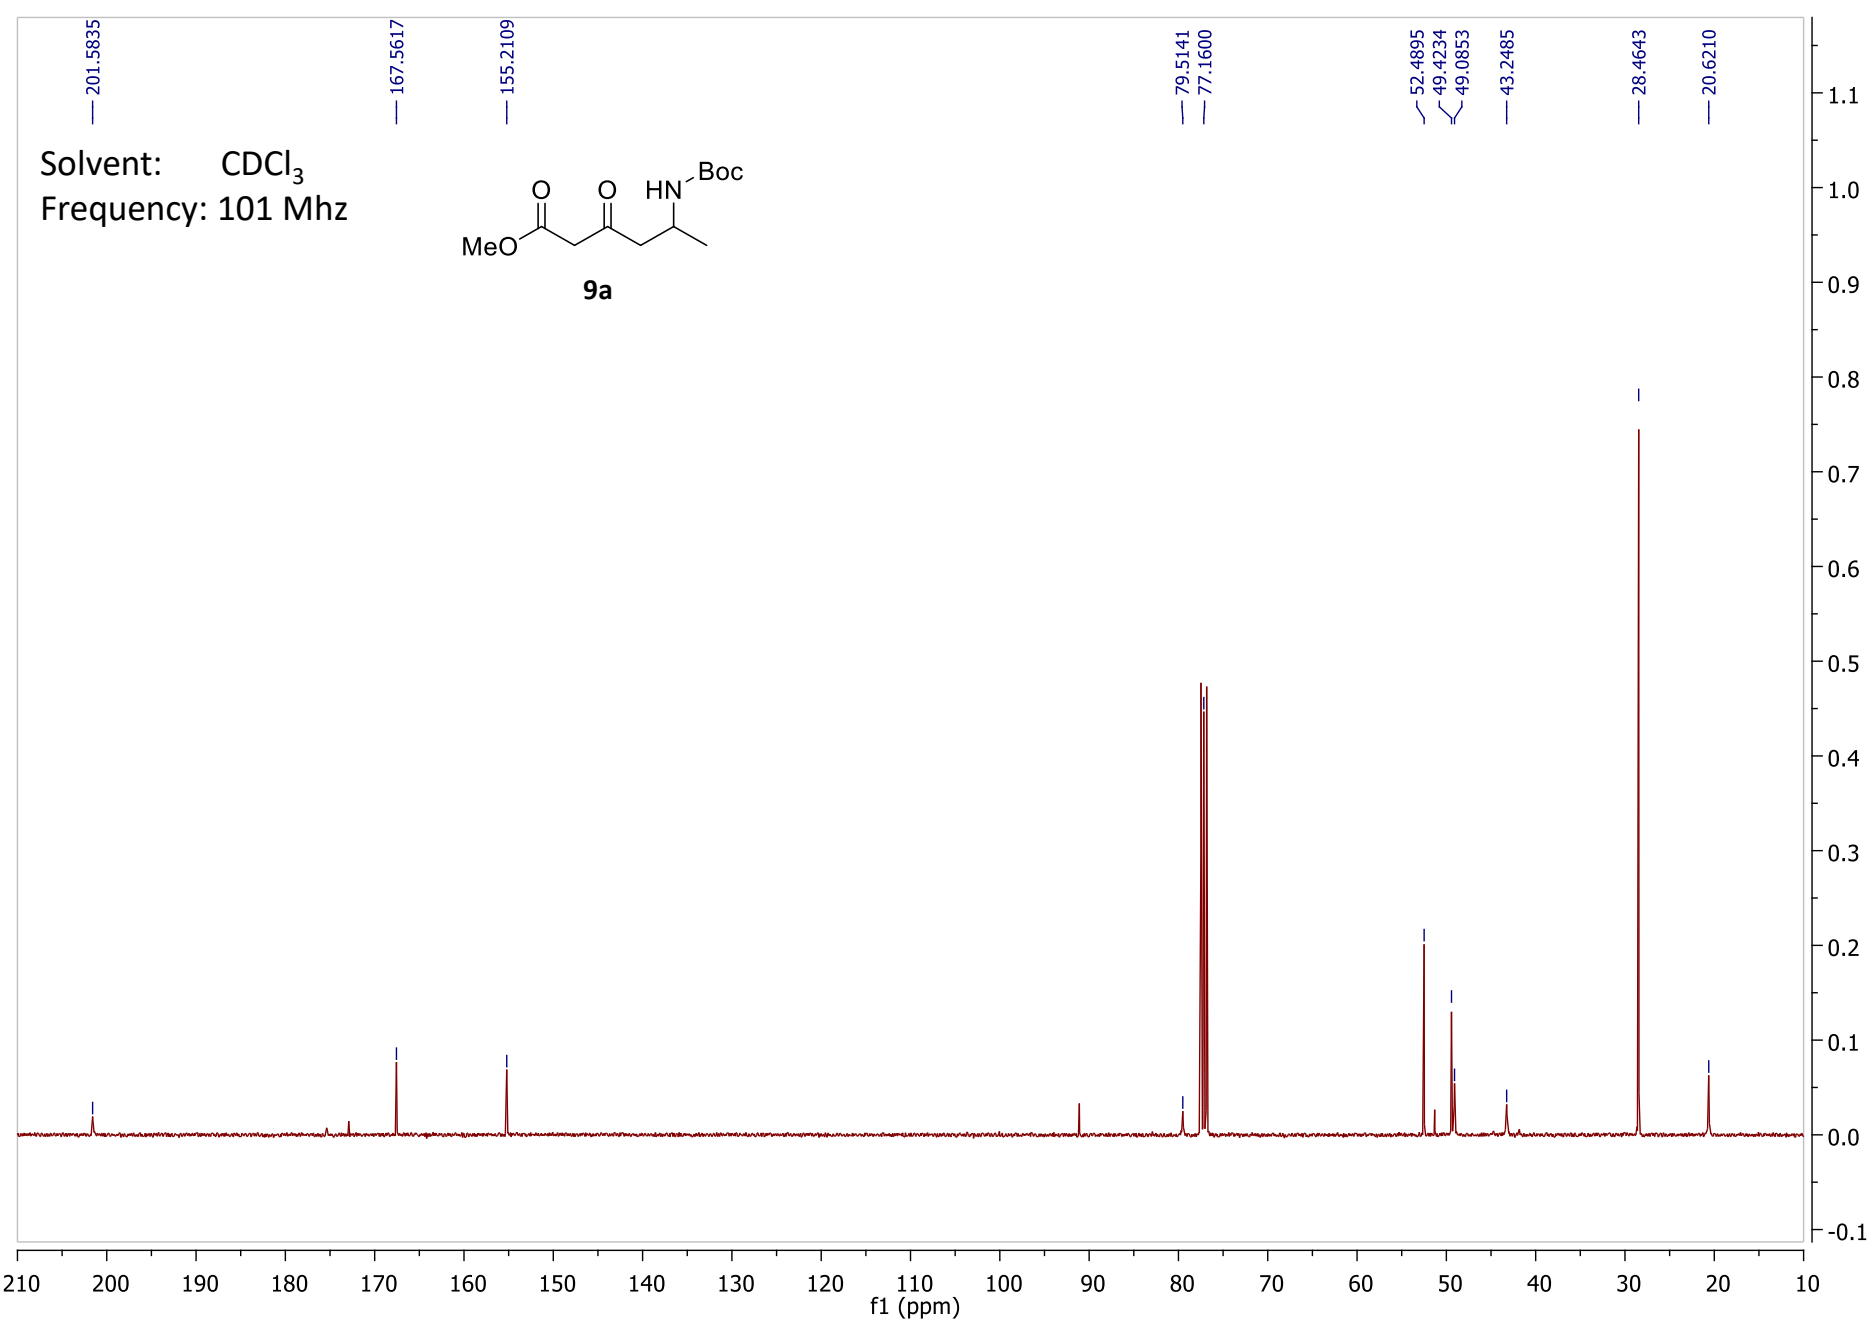

Solvent: CDCl<sub>3</sub>  
Frequency: 400 Mhz

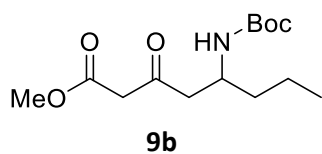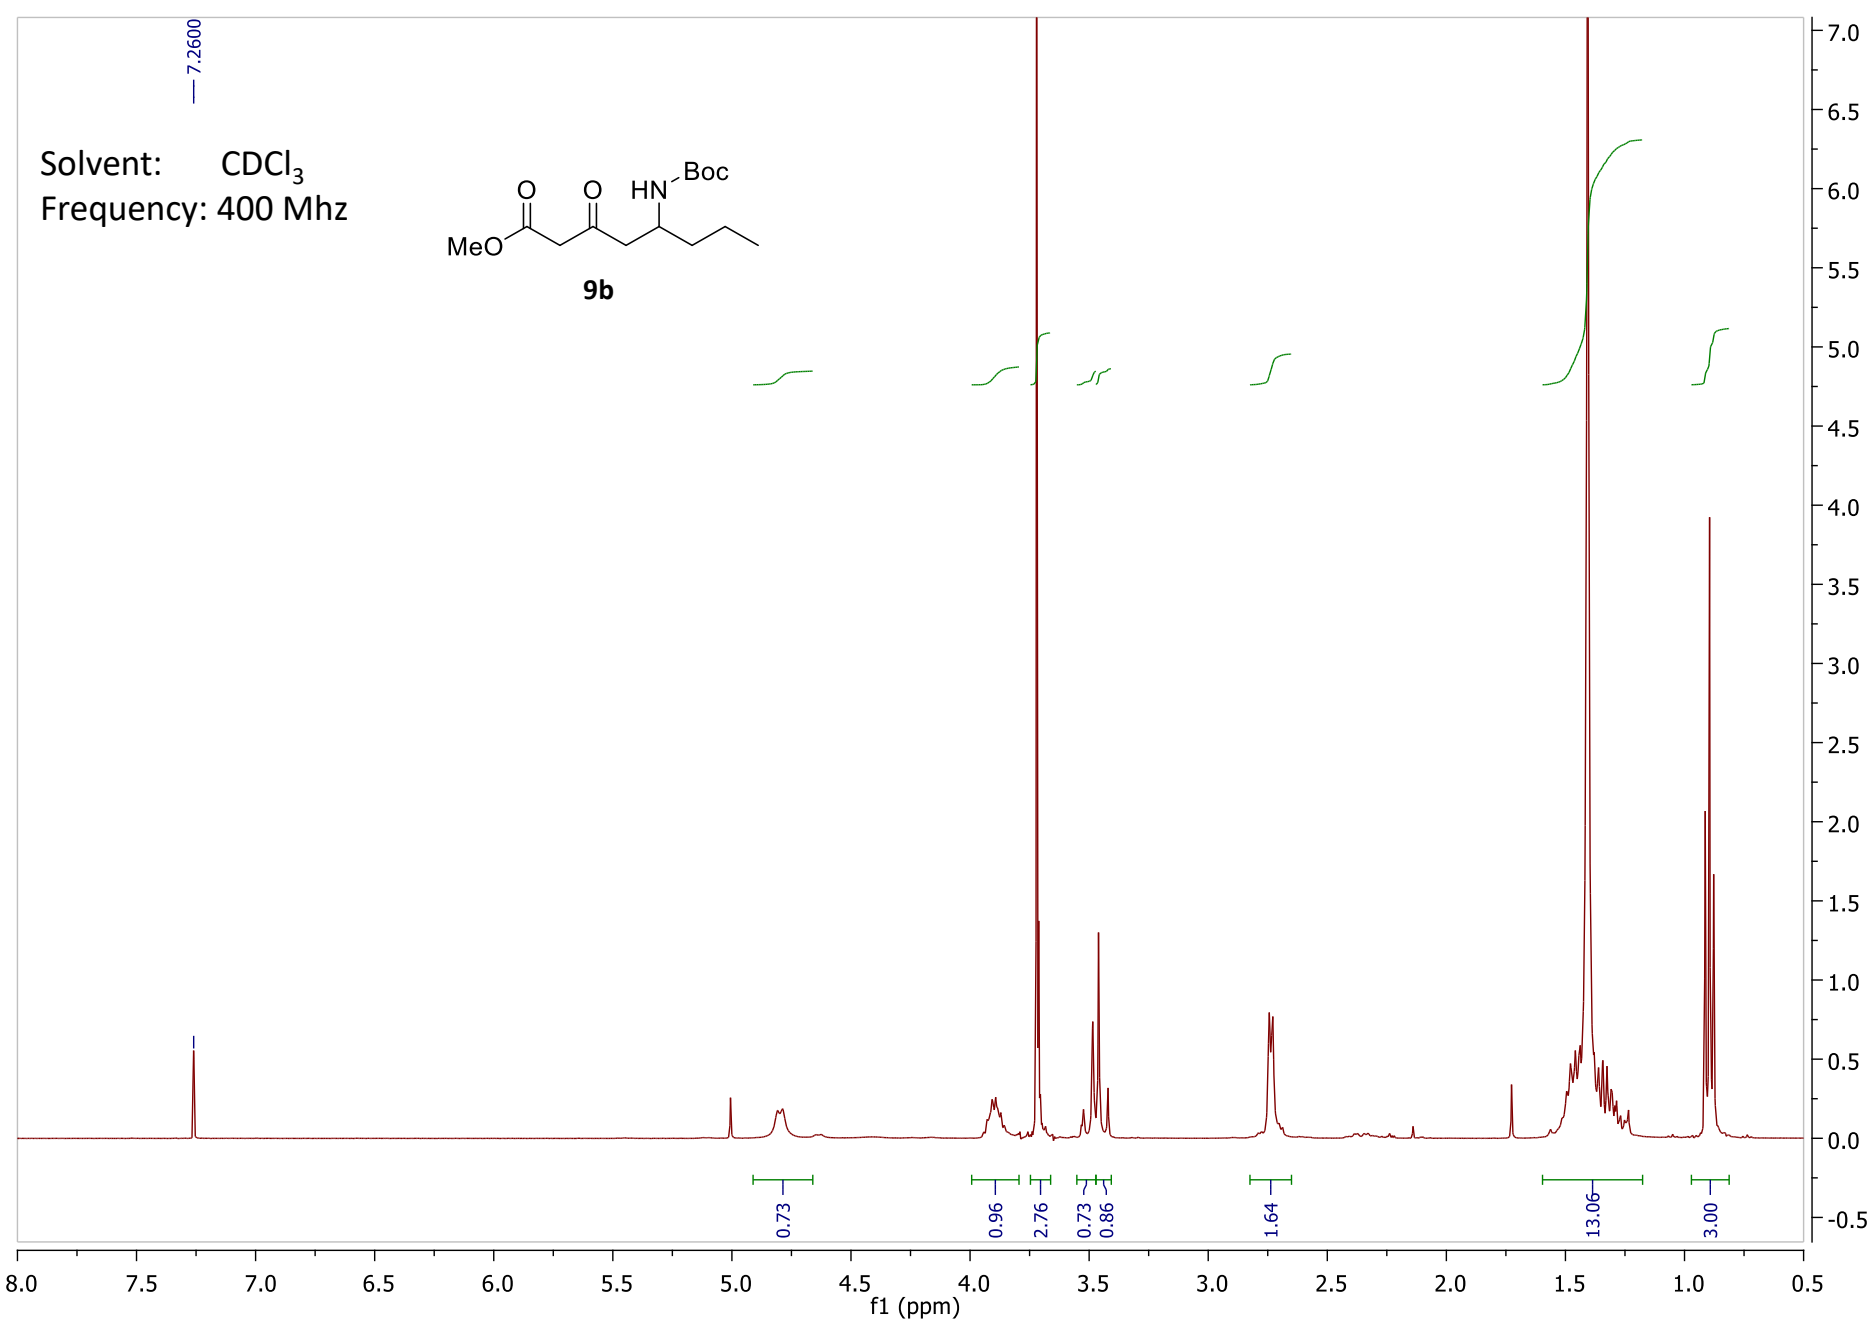

Solvent: CDCl<sub>3</sub>  
Frequency: 101 Mhz

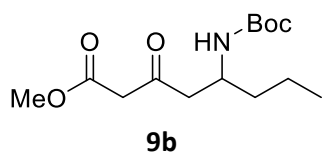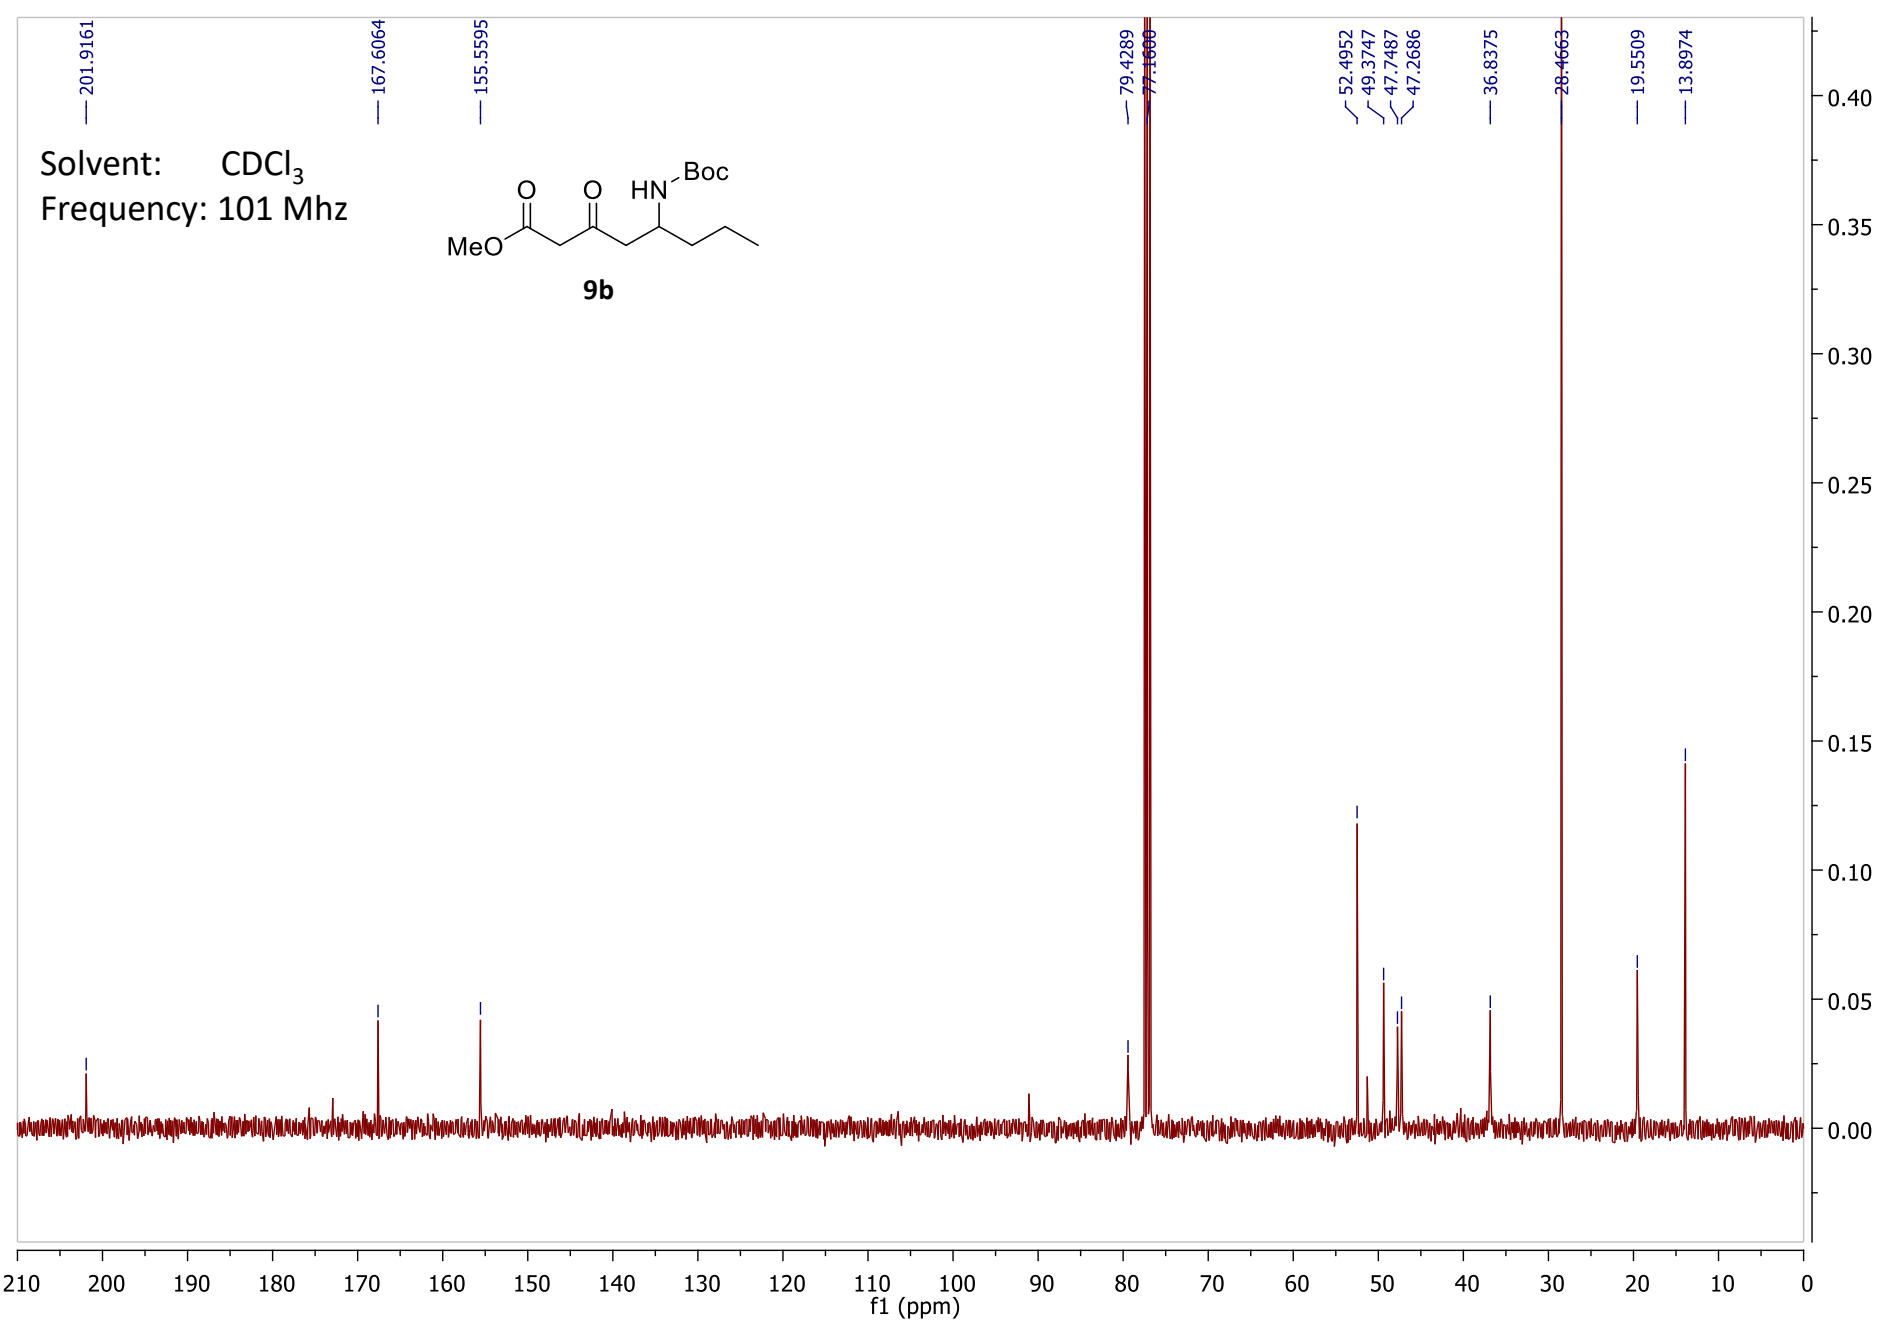

Solvent: CDCl<sub>3</sub>  
Frequency: 400 Mhz

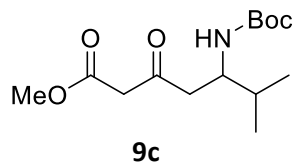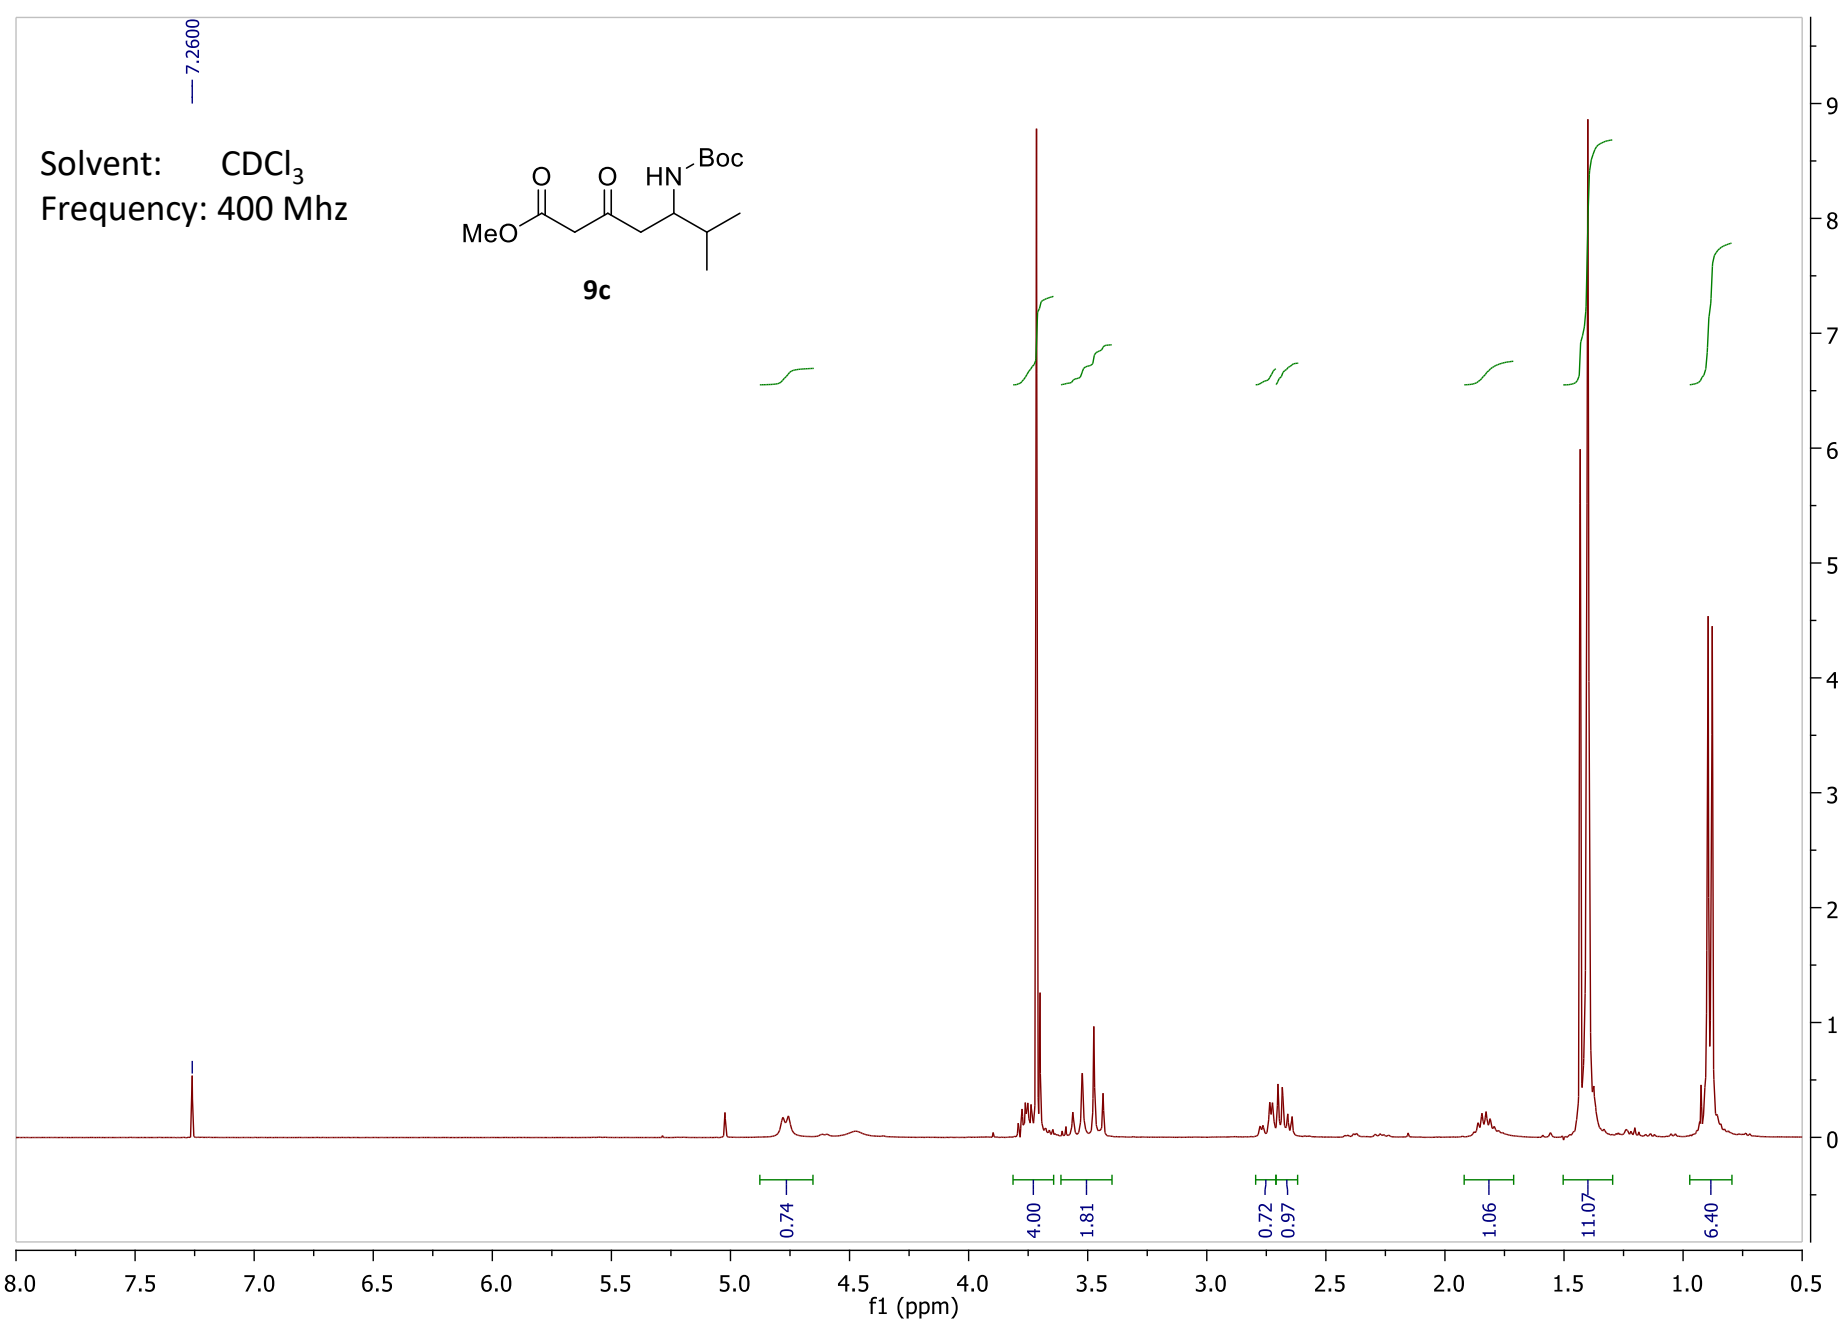

Solvent: CDCl<sub>3</sub>  
Frequency: 101 Mhz

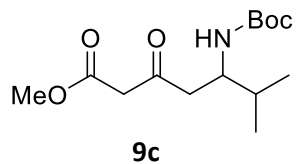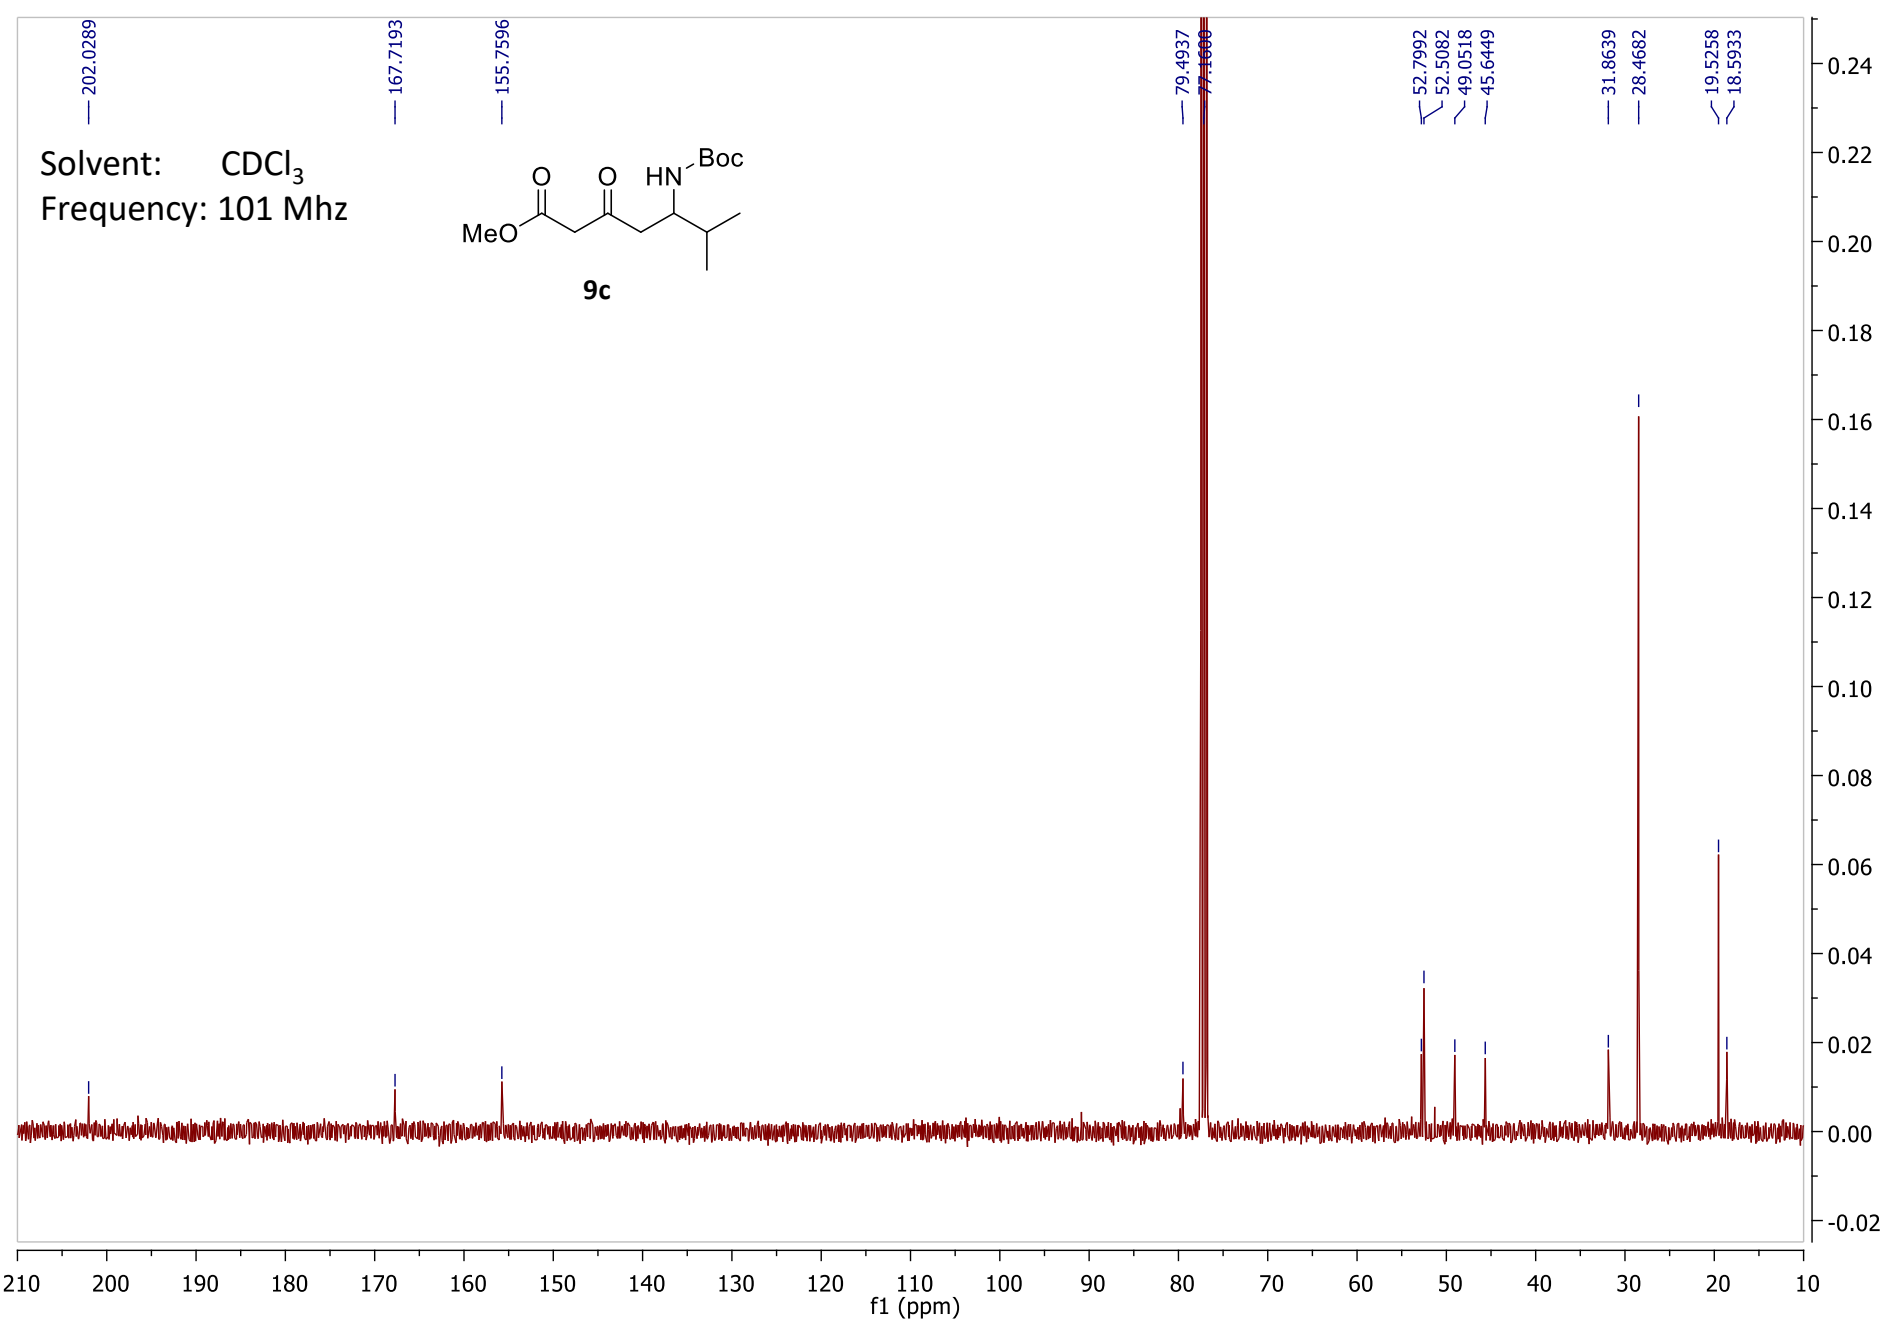

Solvent: CDCl<sub>3</sub>  
Frequency: 400 Mhz

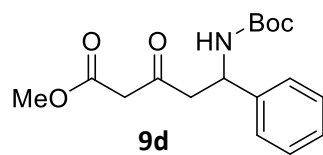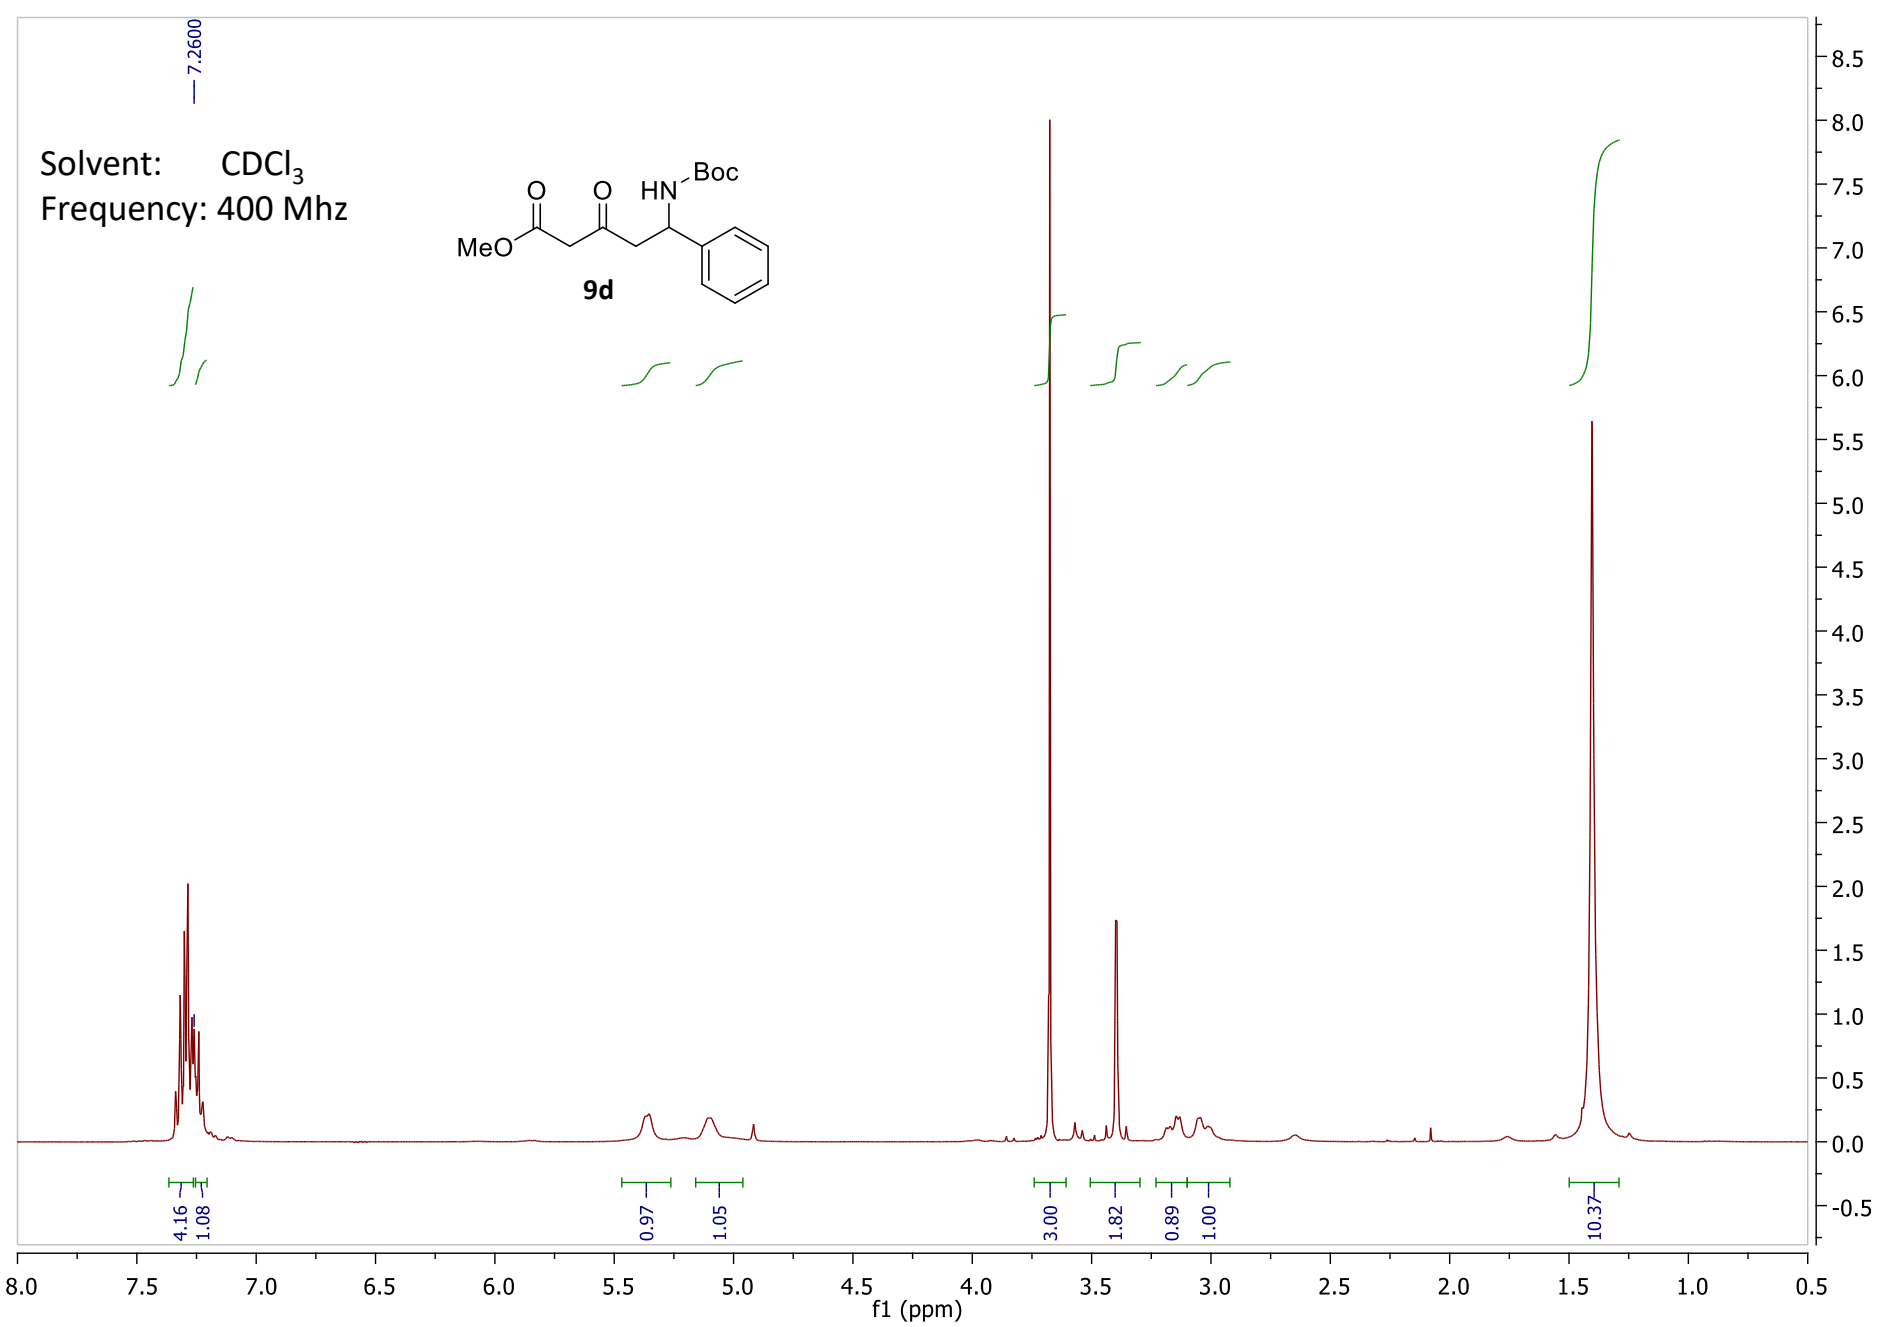

Solvent: CDCl<sub>3</sub>  
Frequency: 101 Mhz

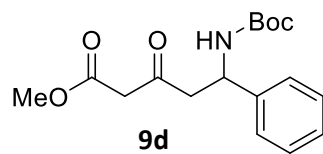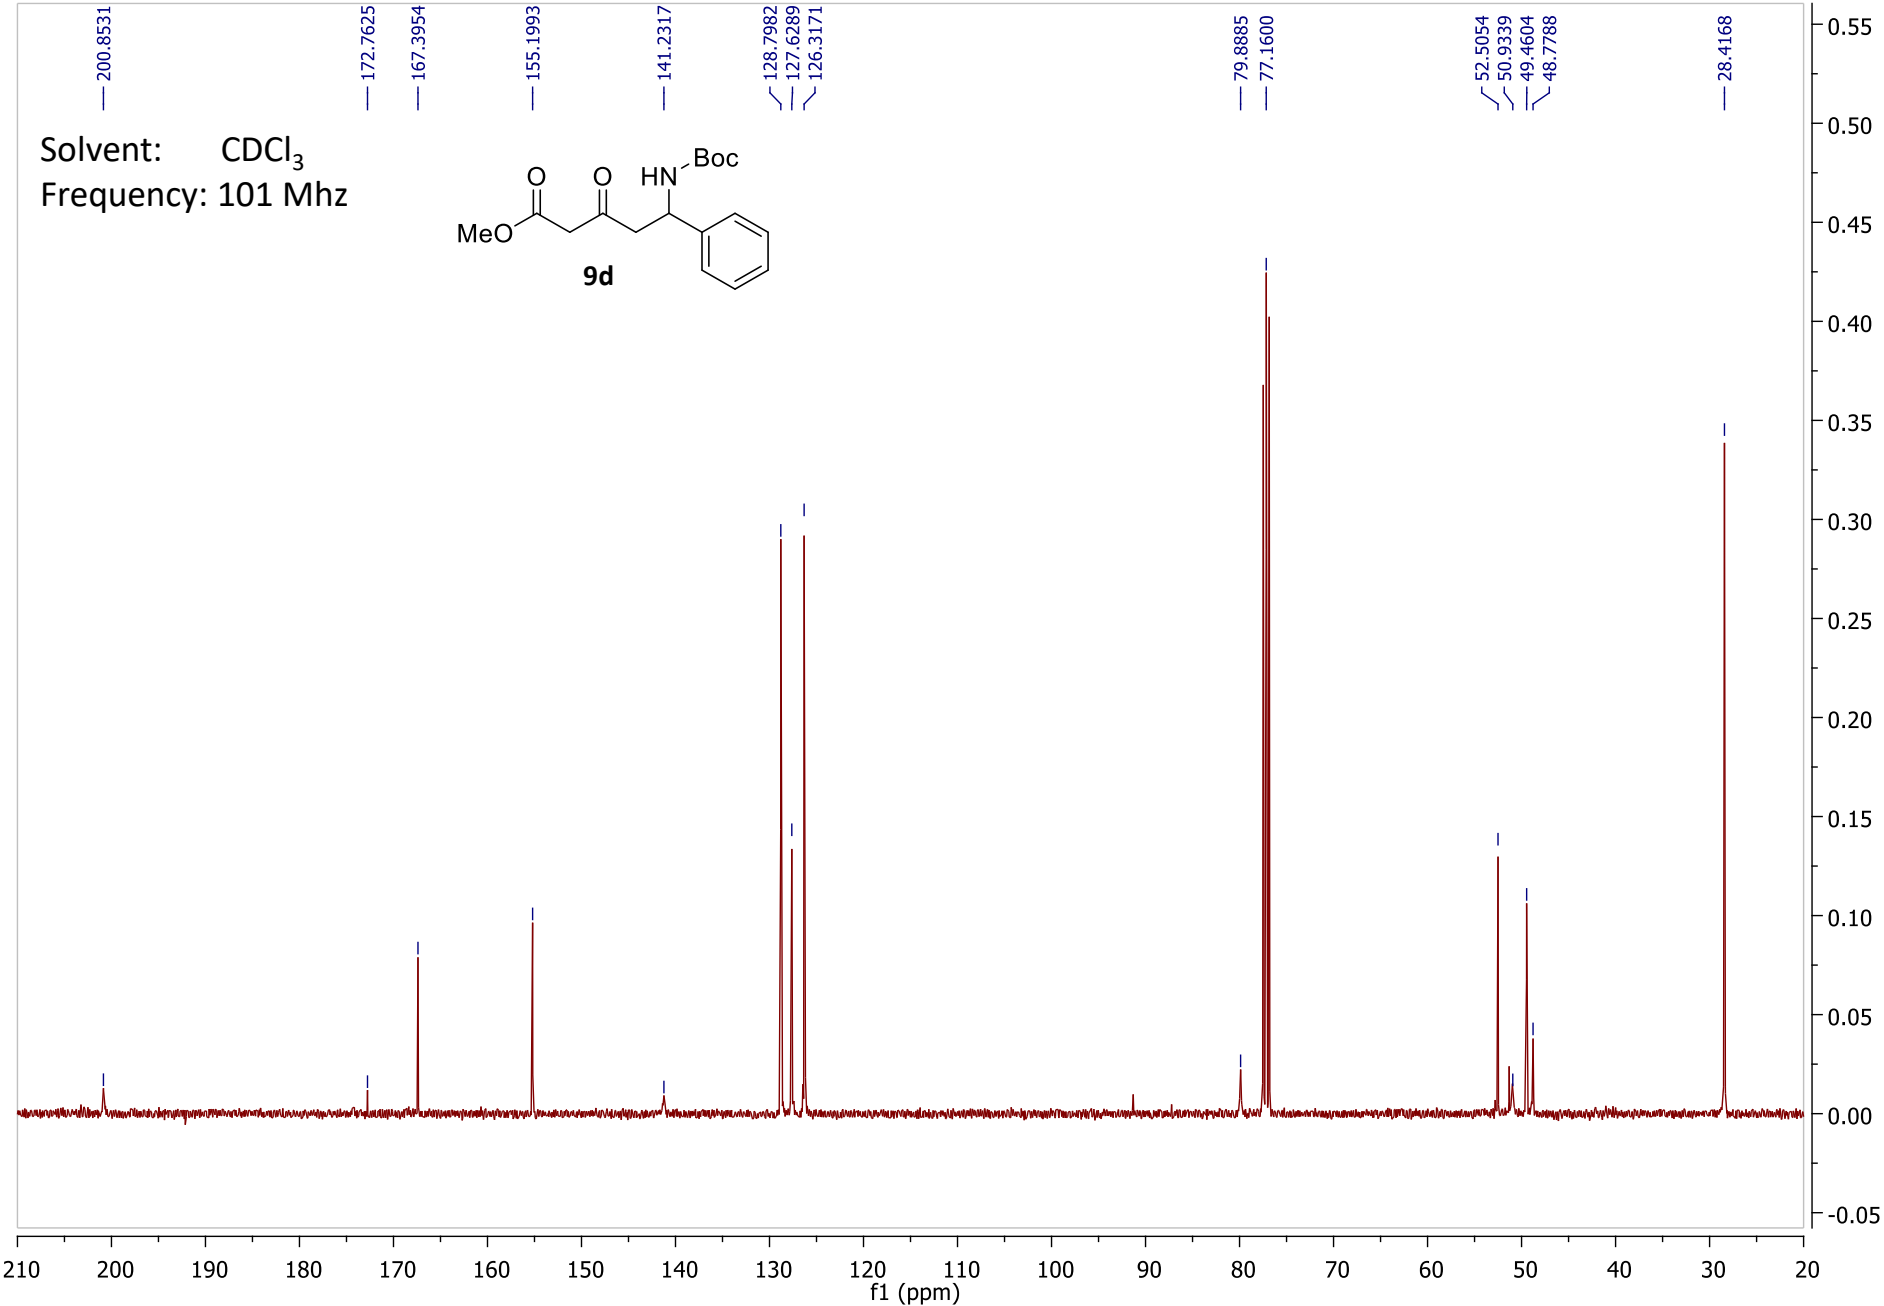

Solvent: CDCl<sub>3</sub>  
Frequency: 400 Mhz

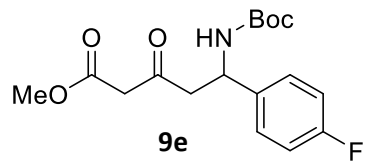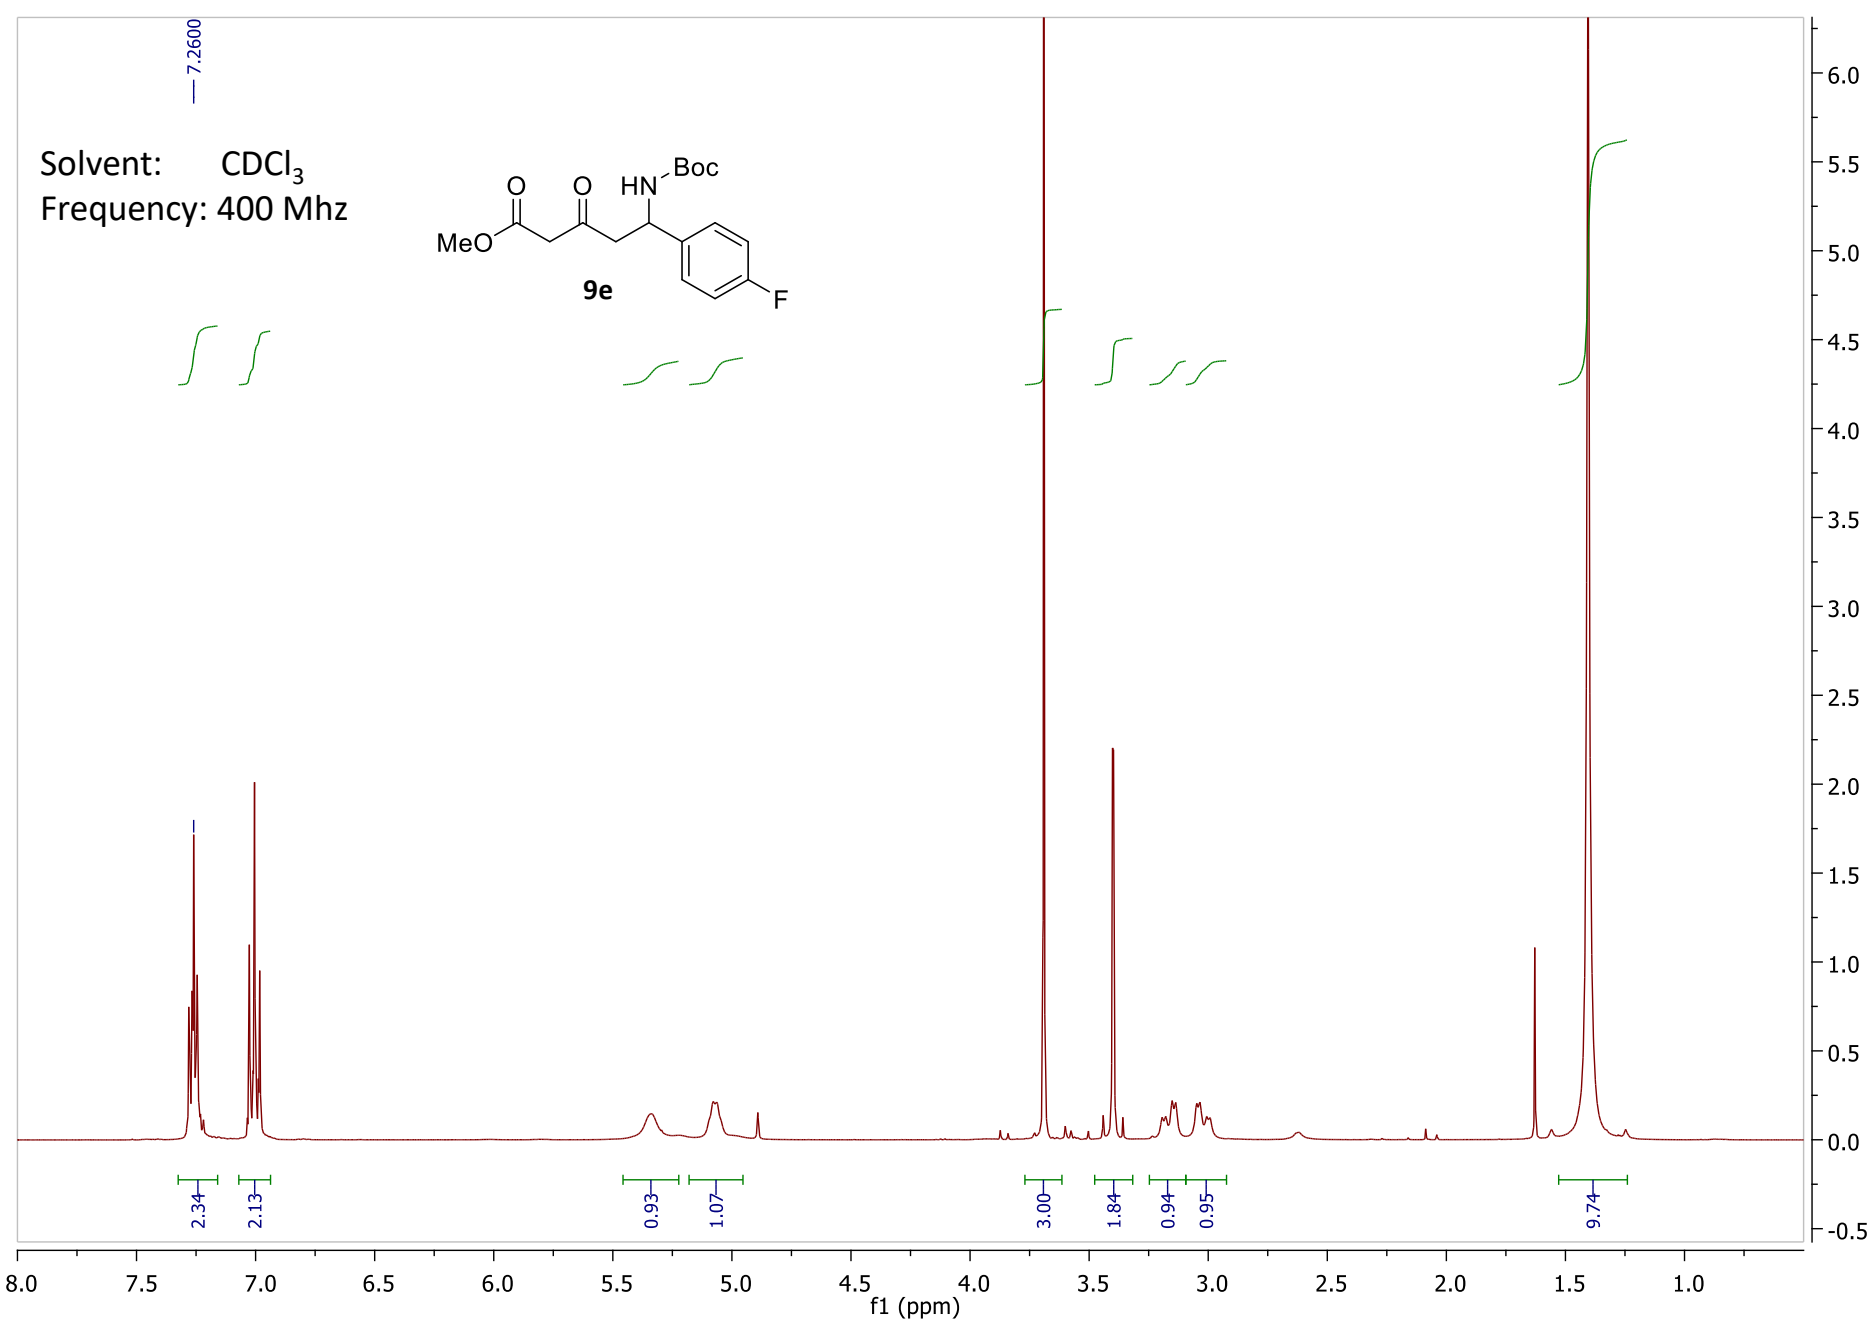



Solvent:  $\text{CDCl}_3$   
Frequency: 101 Mhz

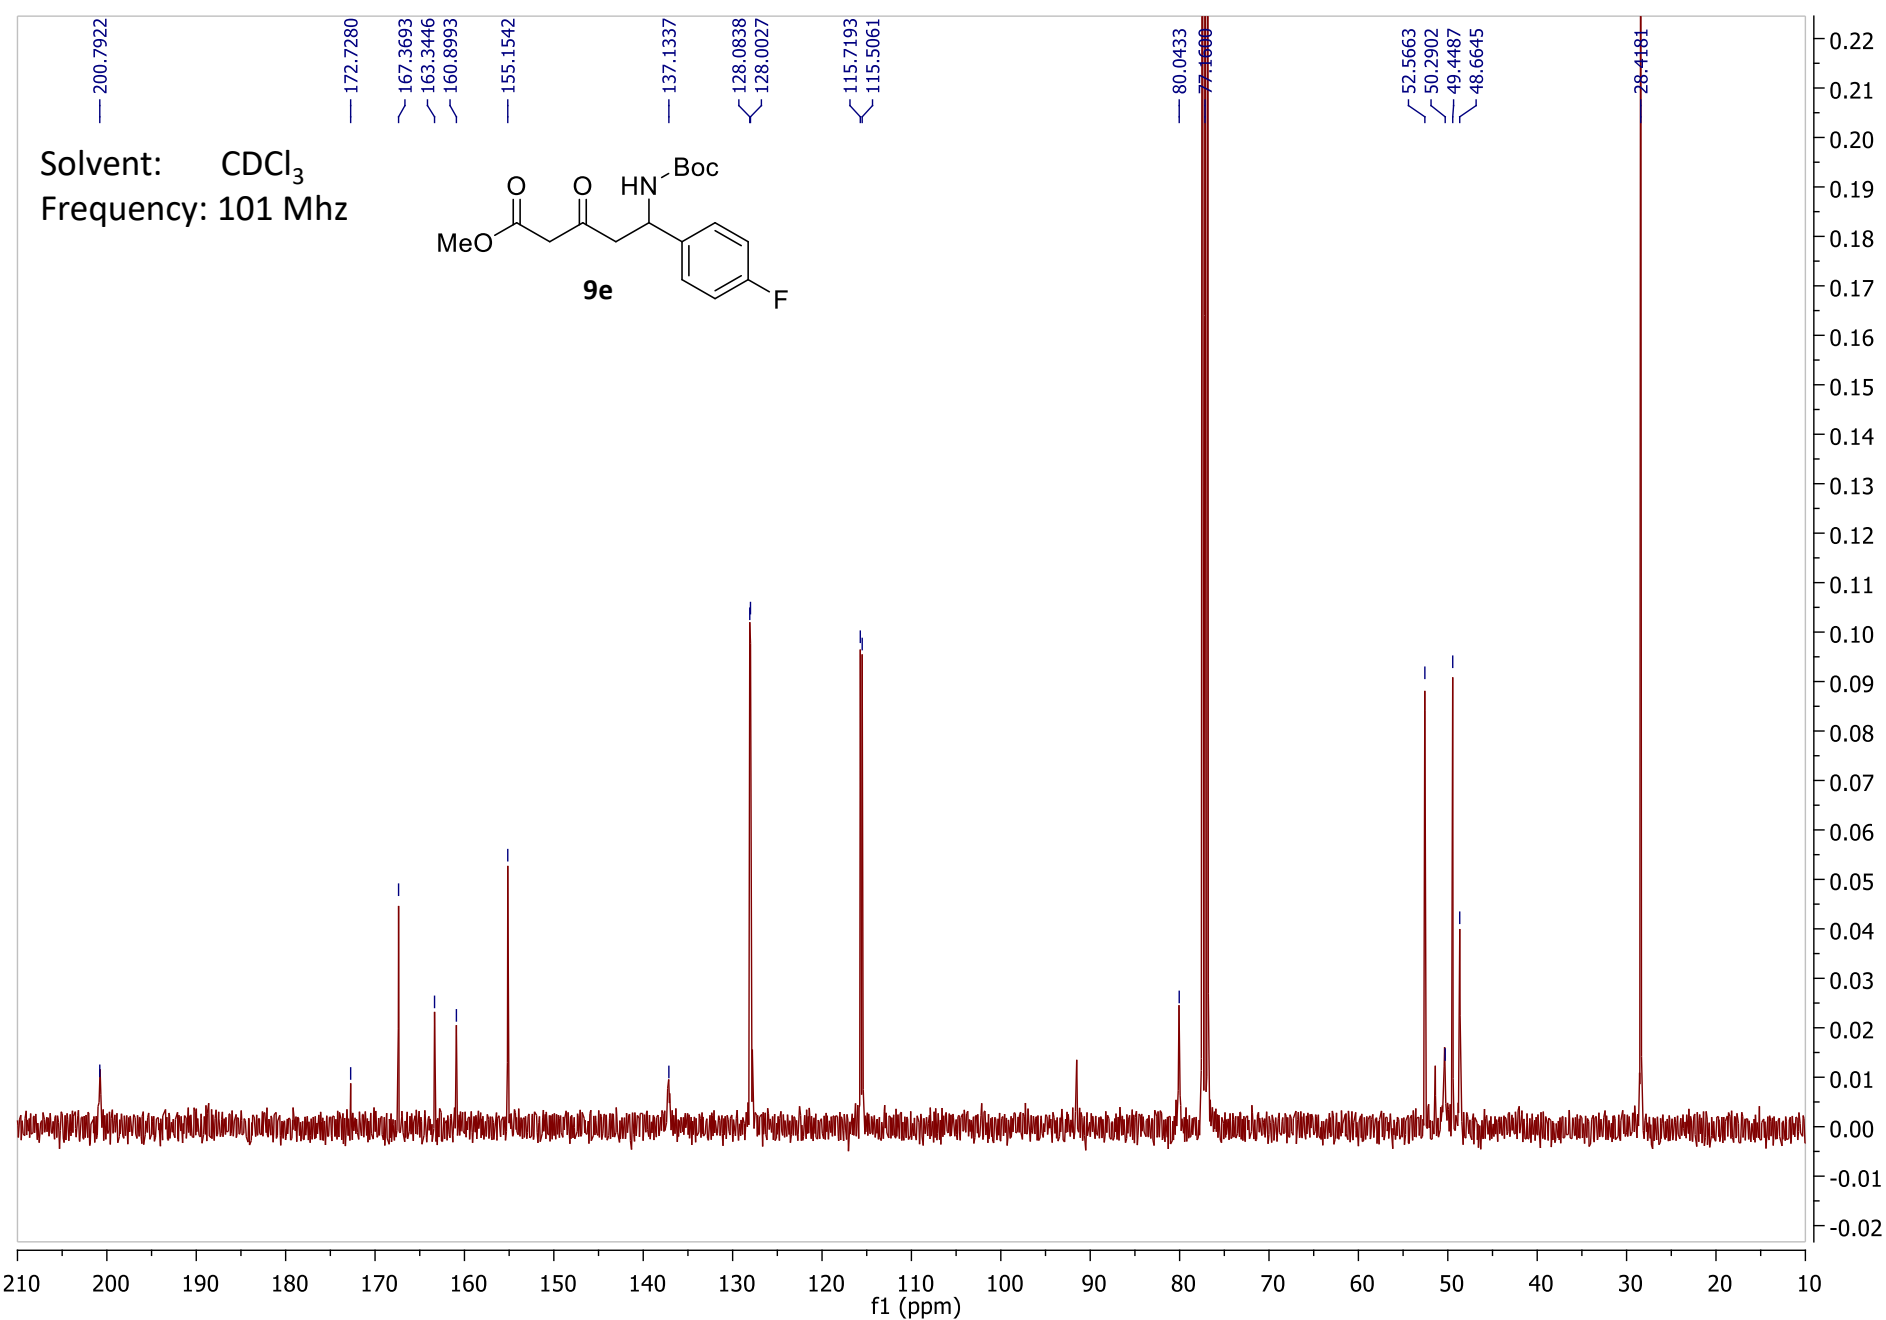

Solvent:  $\text{CDCl}_3$   
Frequency: 376 Mhz

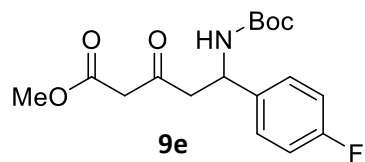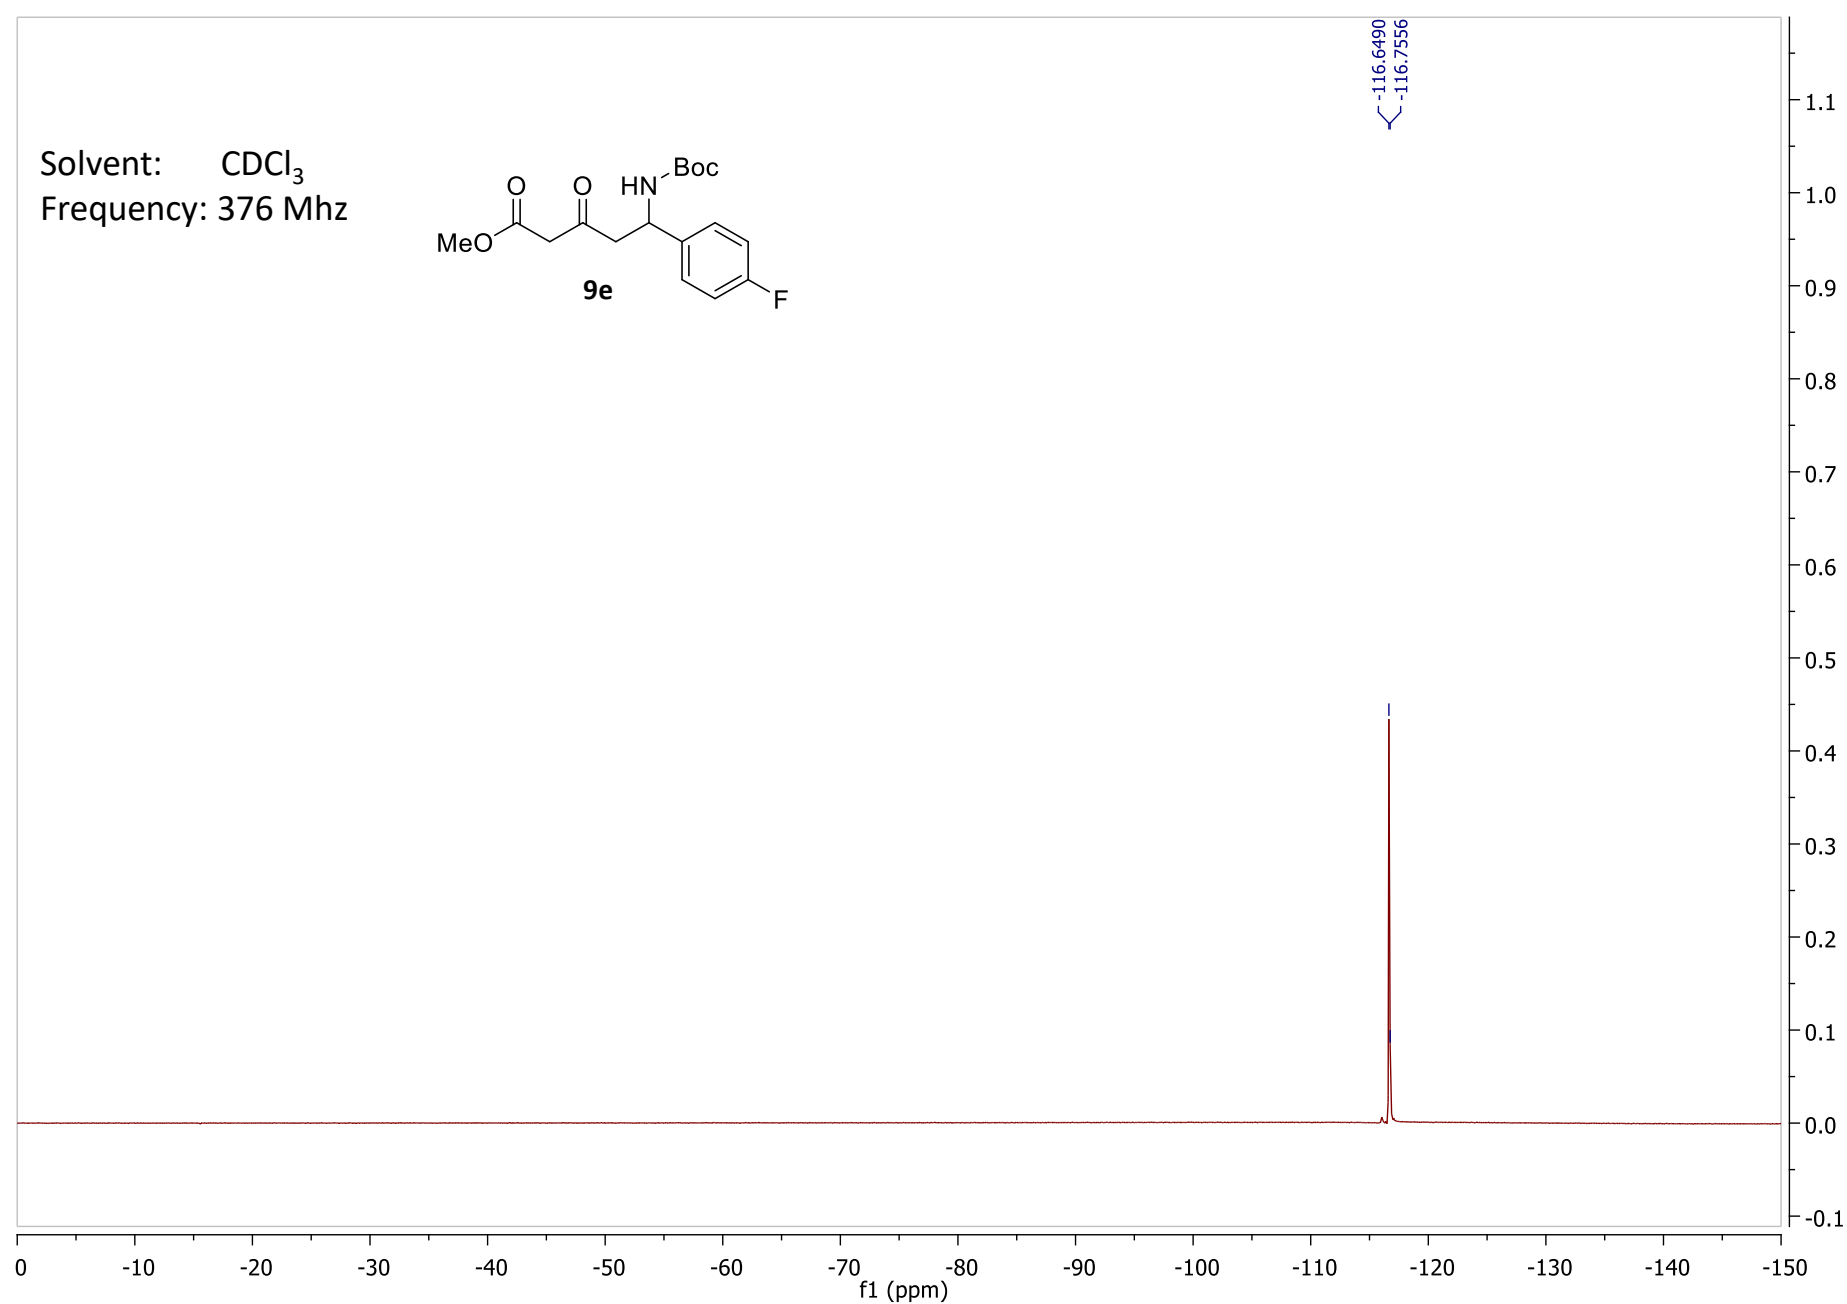

Solvent: CDCl<sub>3</sub>  
Frequency: 400 Mhz

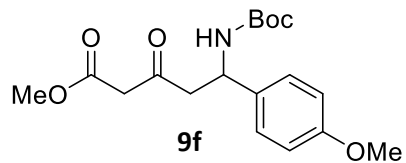

7.2600

1.96

1.97

0.85

0.95

3.00

2.87

1.78

0.89

0.90

8.93

f1 (ppm)

Solvent:  $\text{CDCl}_3$   
Frequency: 101 Mhz

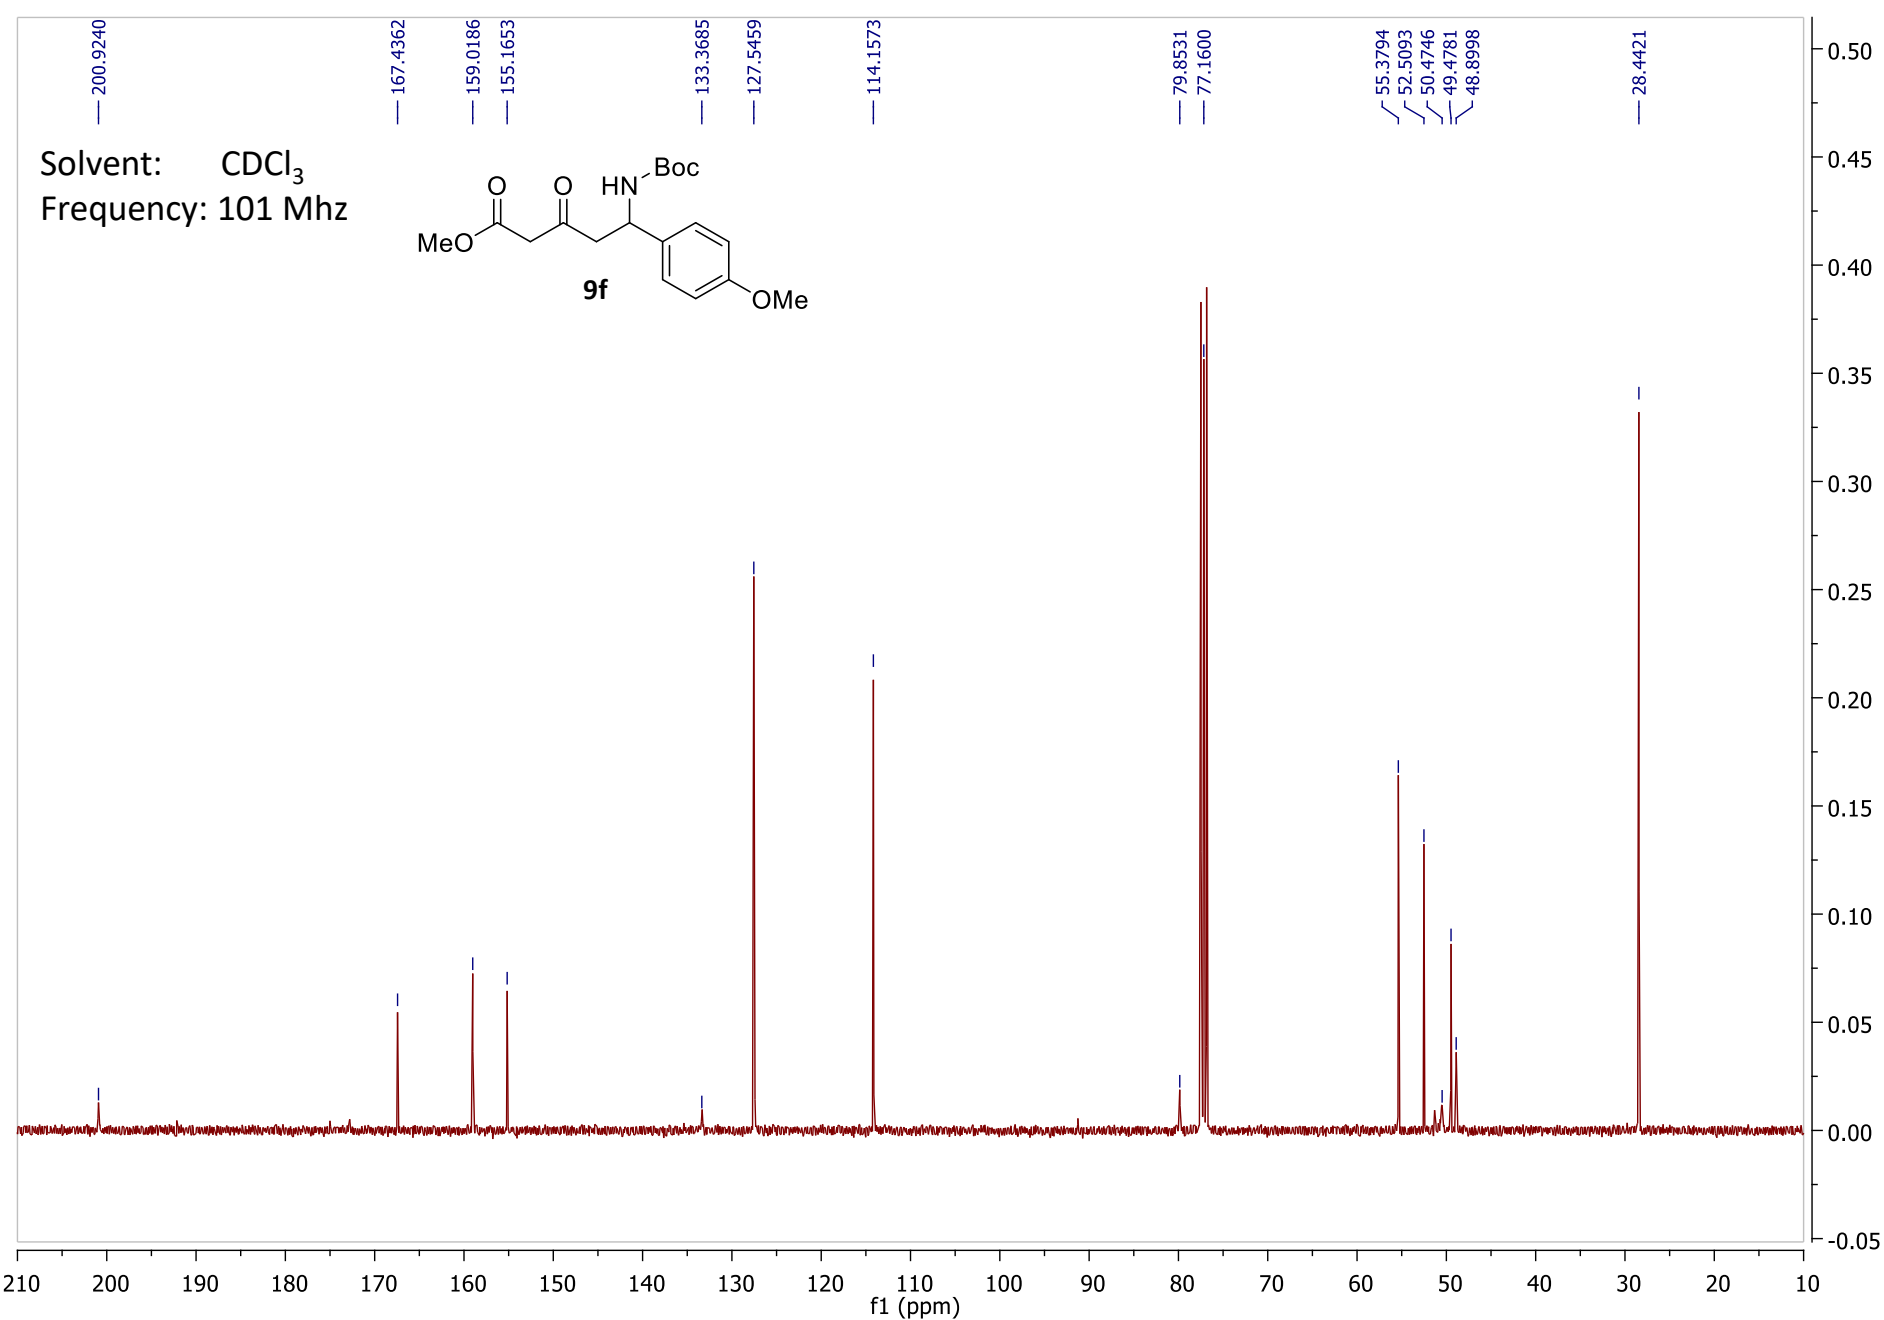

Solvent:  $\text{CDCl}_3$   
Frequency: 400 Mhz

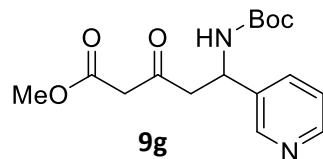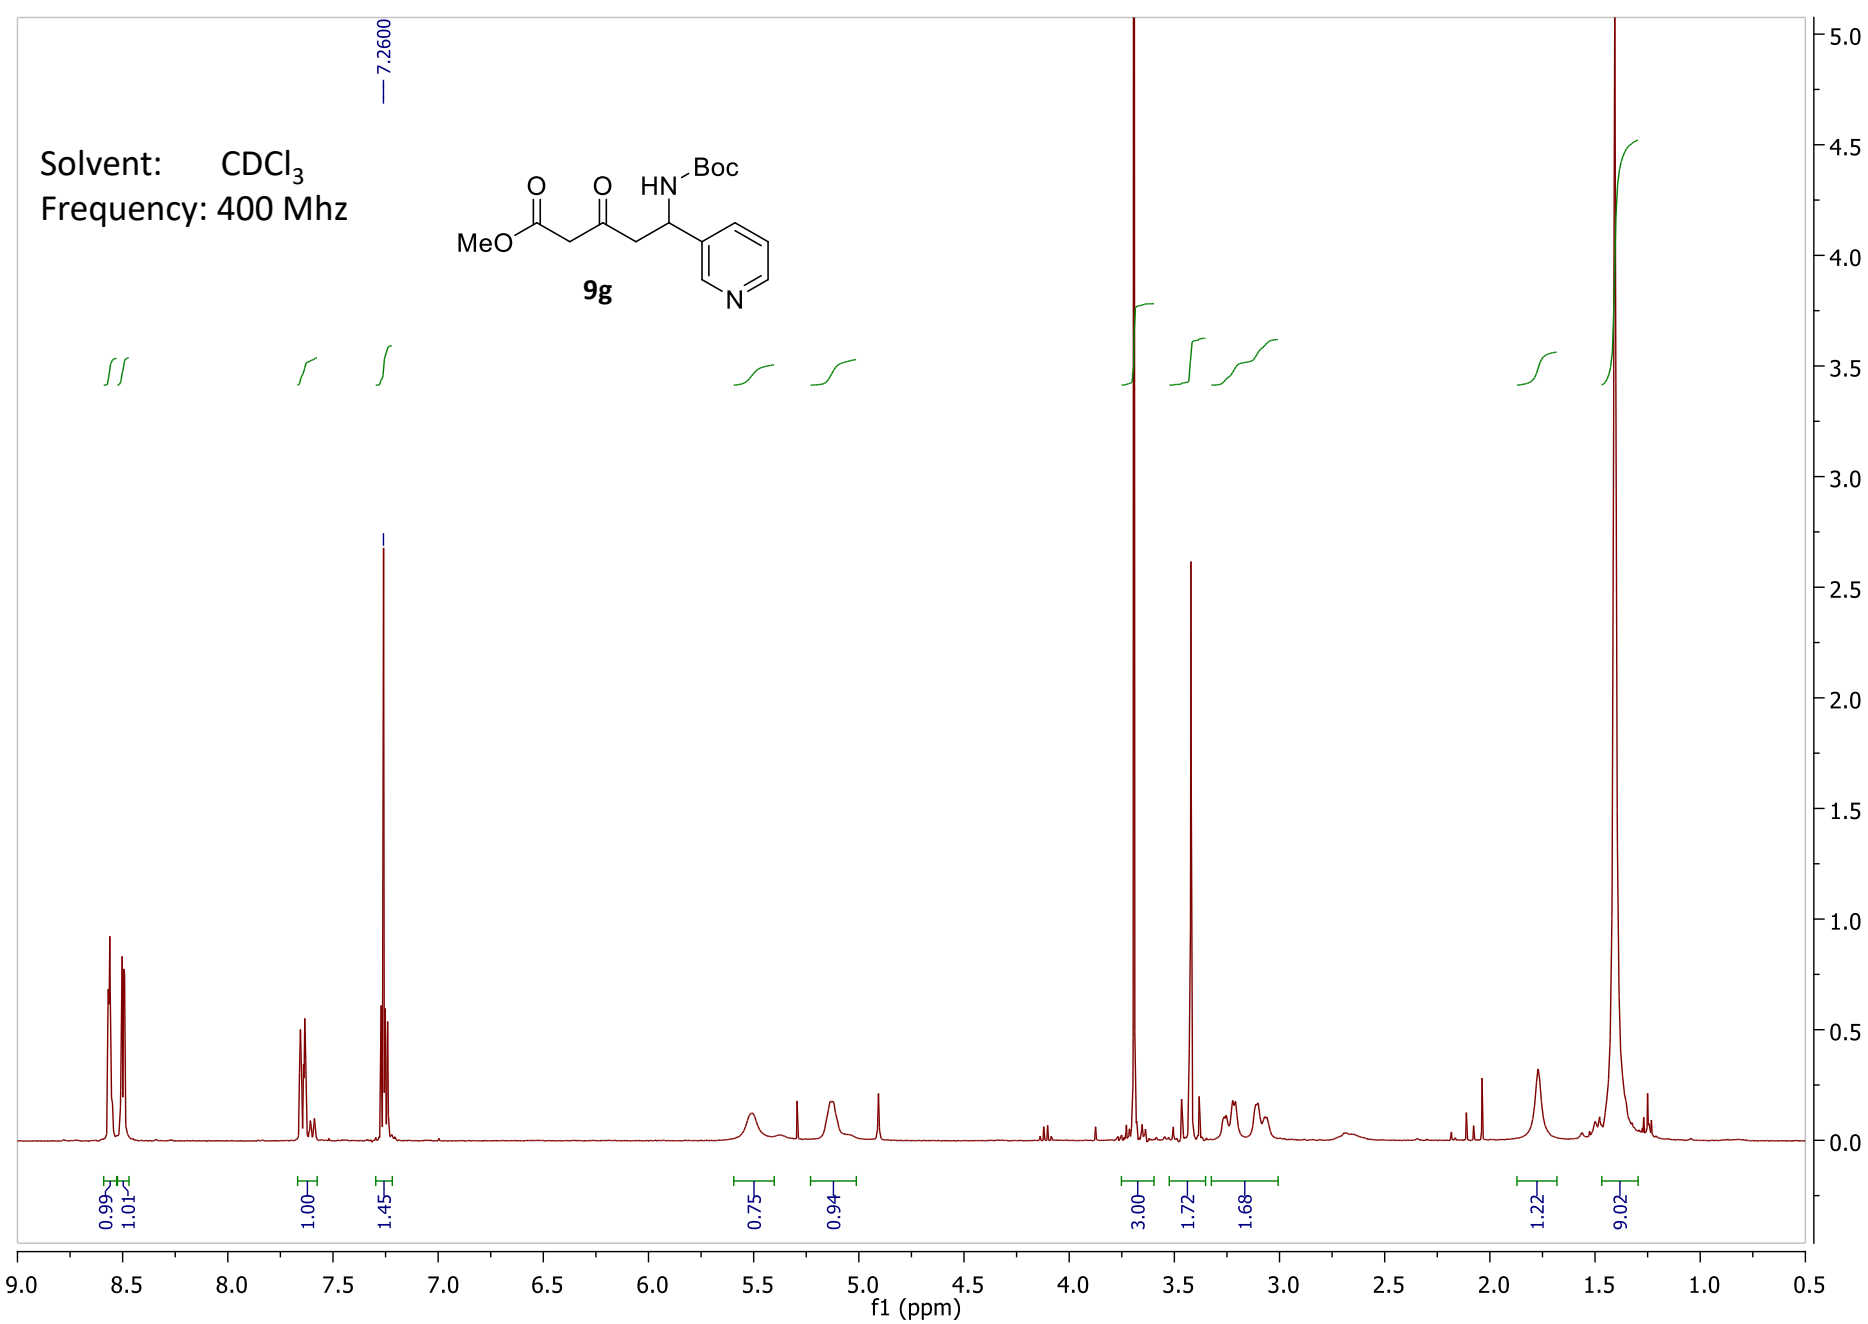

Solvent: CDCl<sub>3</sub>  
Frequency: 101 Mhz

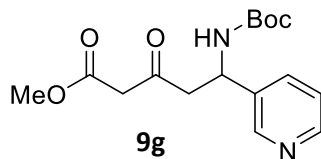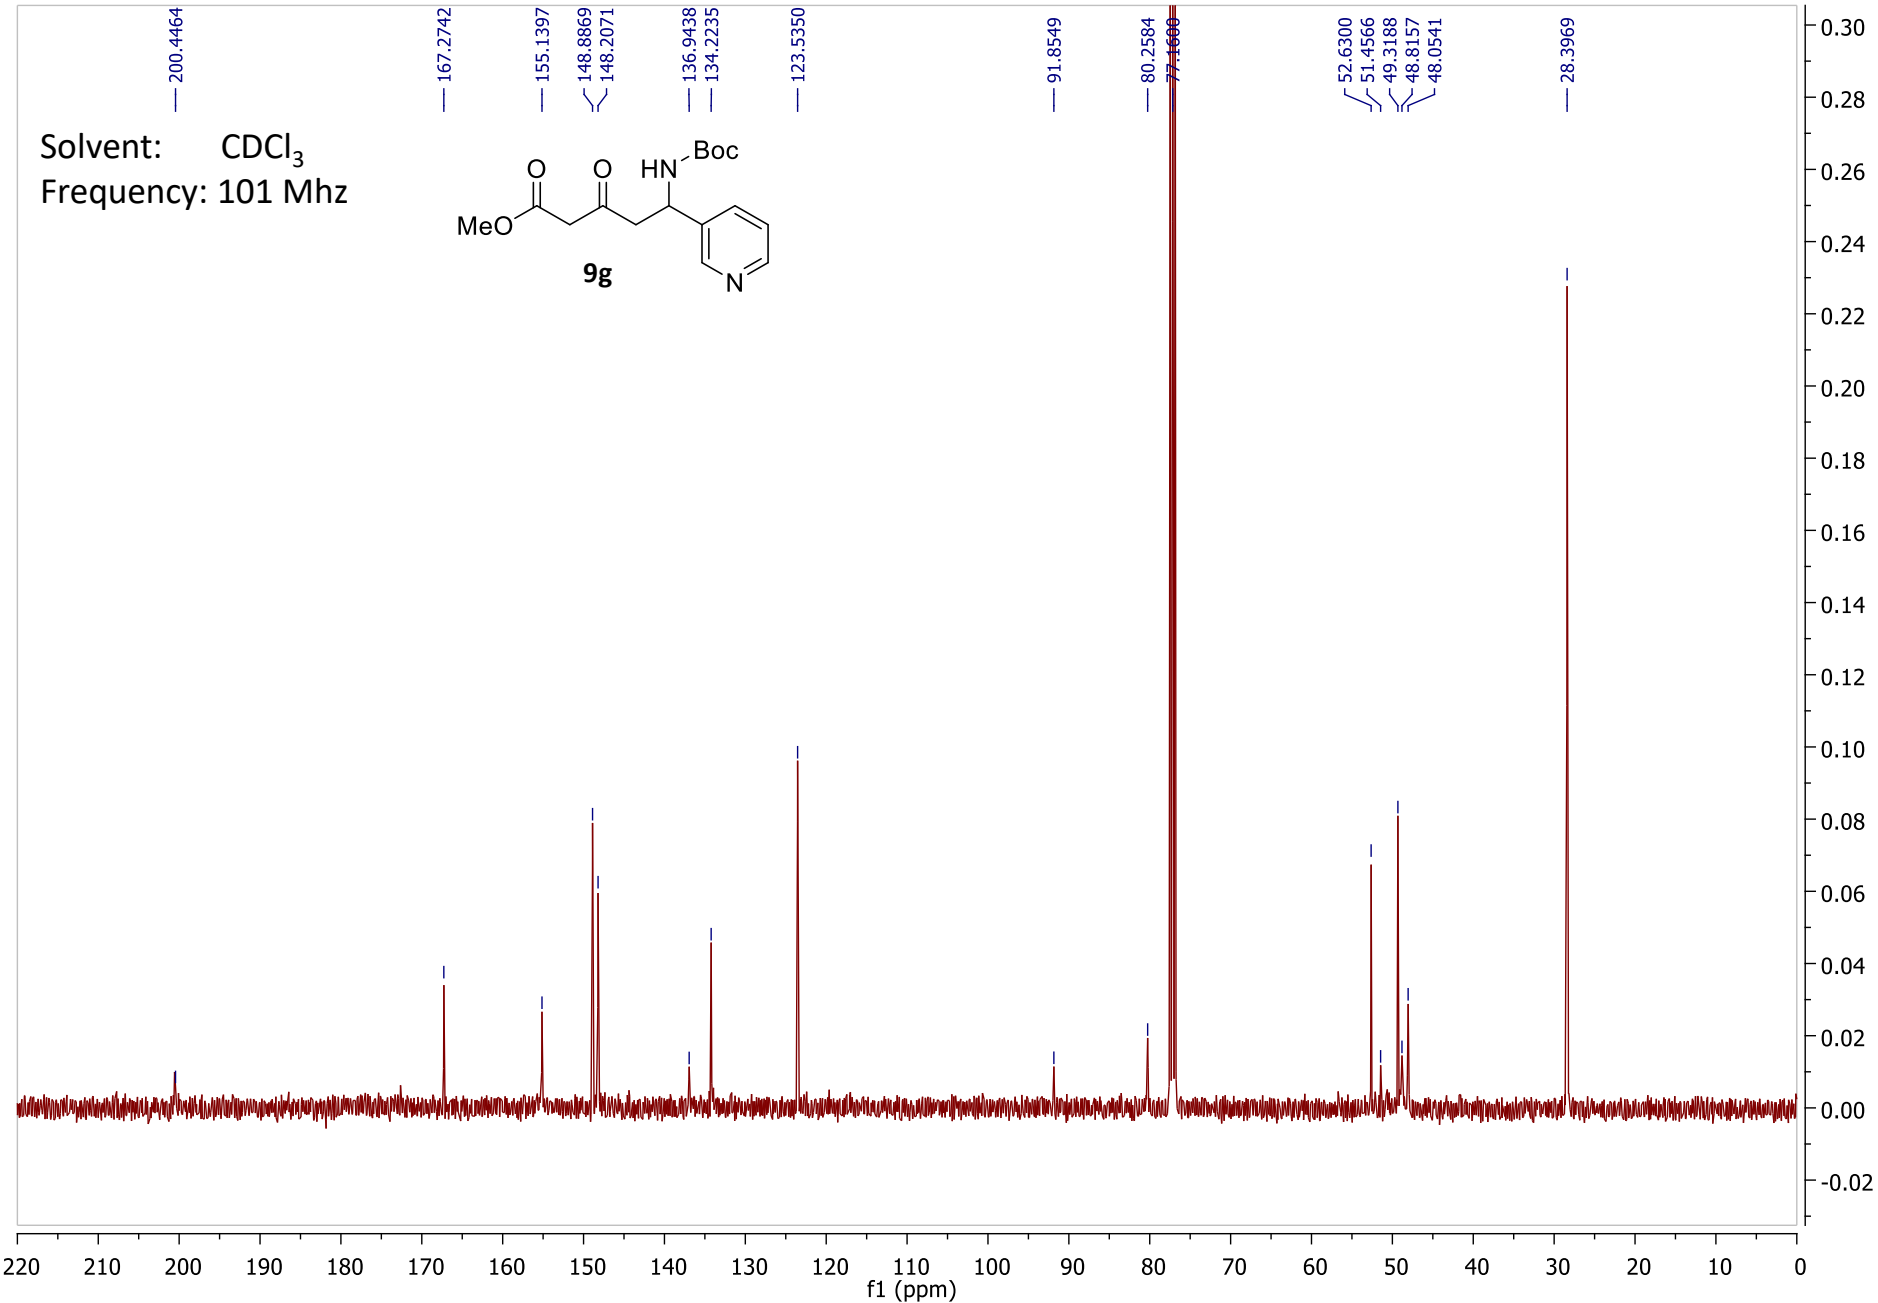

Solvent: CDCl<sub>3</sub>  
Frequency: 400 Mhz

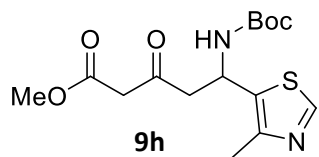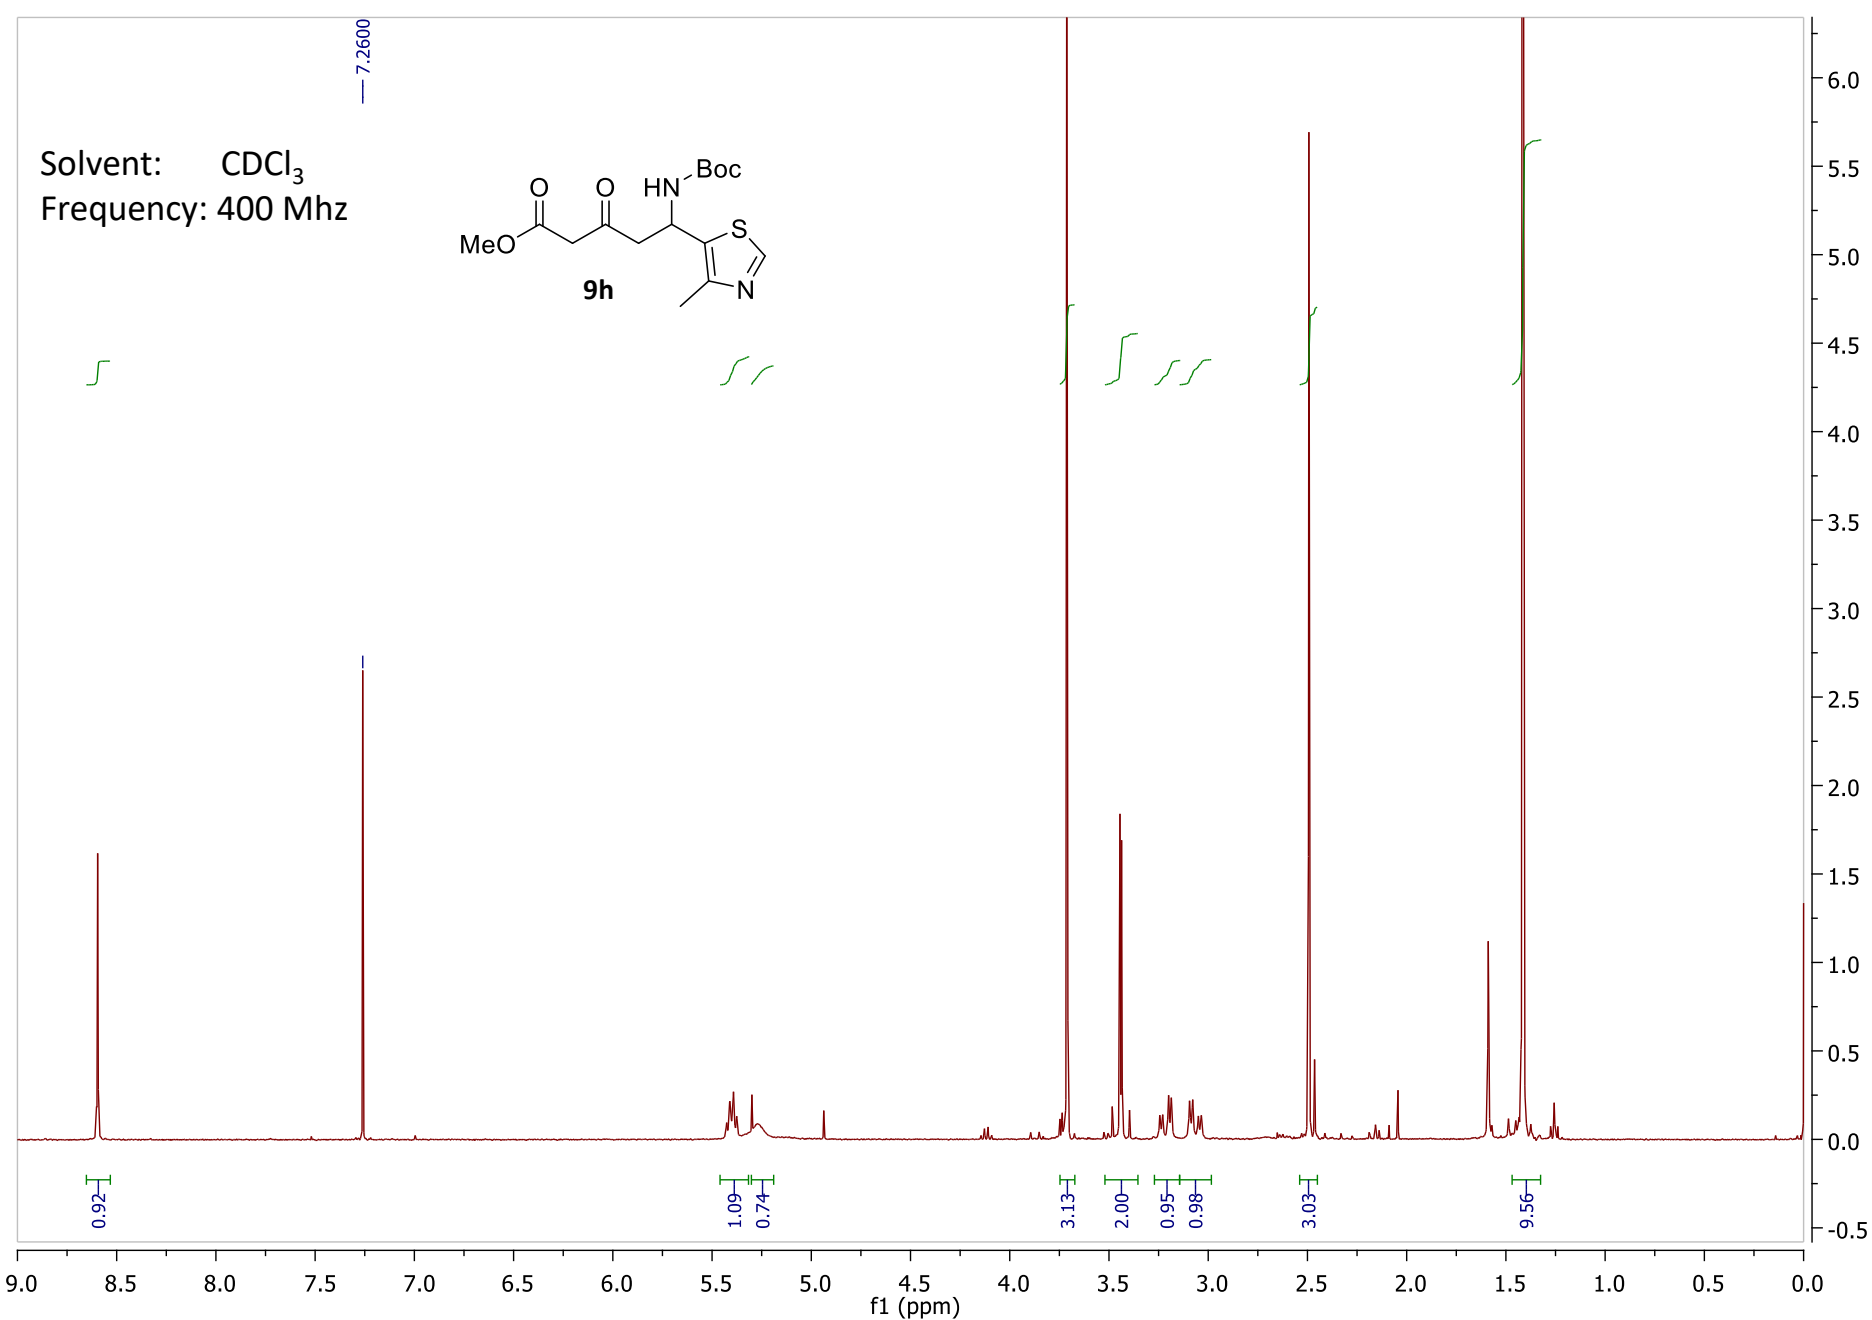

Solvent: CDCl<sub>3</sub>  
Frequency: 101 Mhz

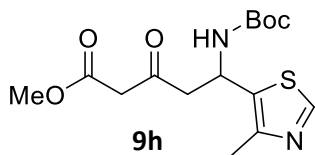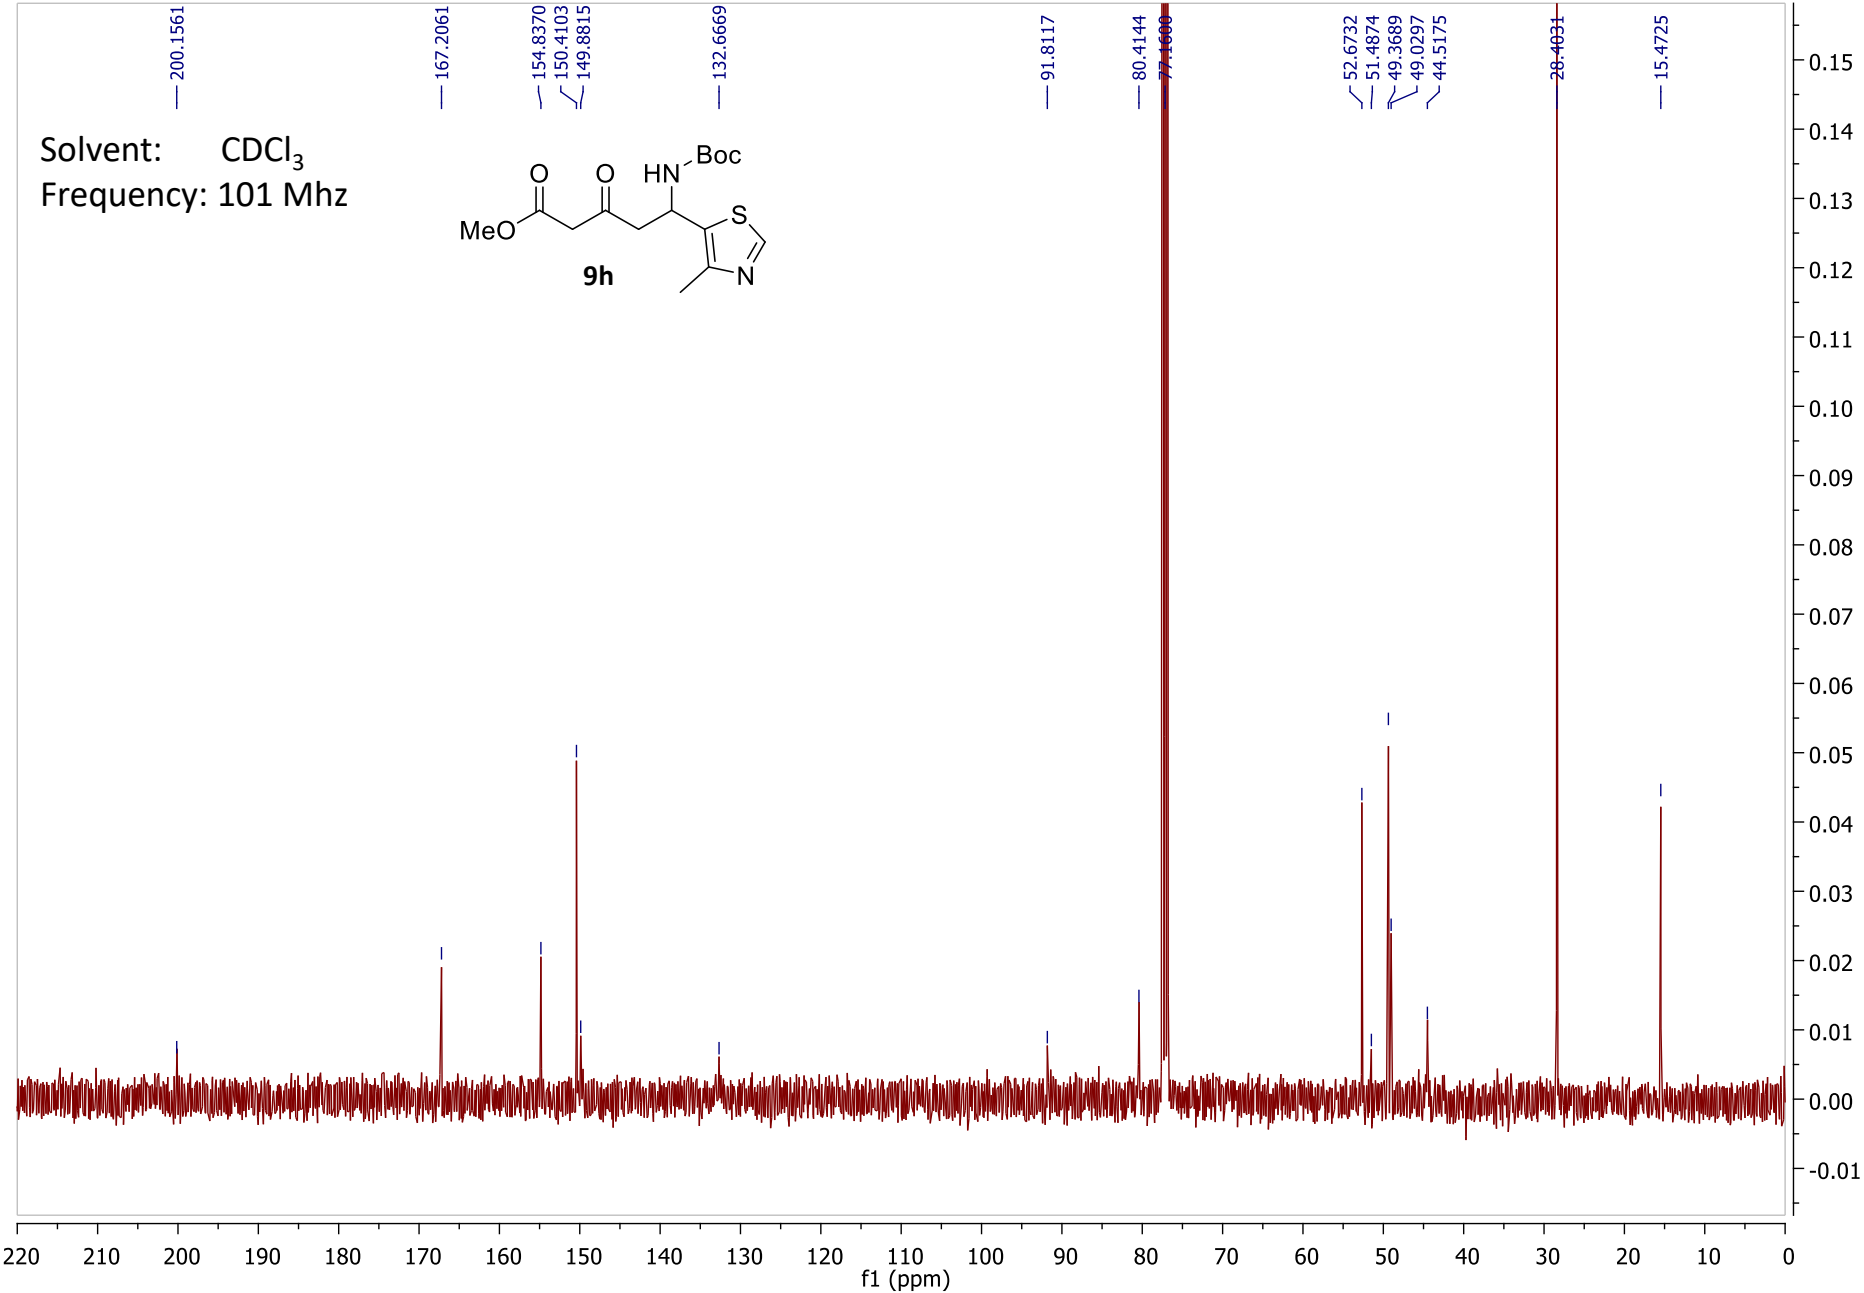



Solvent: CDCl<sub>3</sub>  
Frequency: 400 Mhz

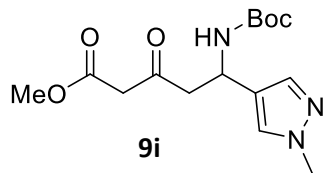

7.2600

1.01  
1.14

0.74  
0.99

3.36  
3.20

1.70

0.85  
0.87

10.49

f1 (ppm)

Solvent: CDCl<sub>3</sub>  
Frequency: 101 Mhz

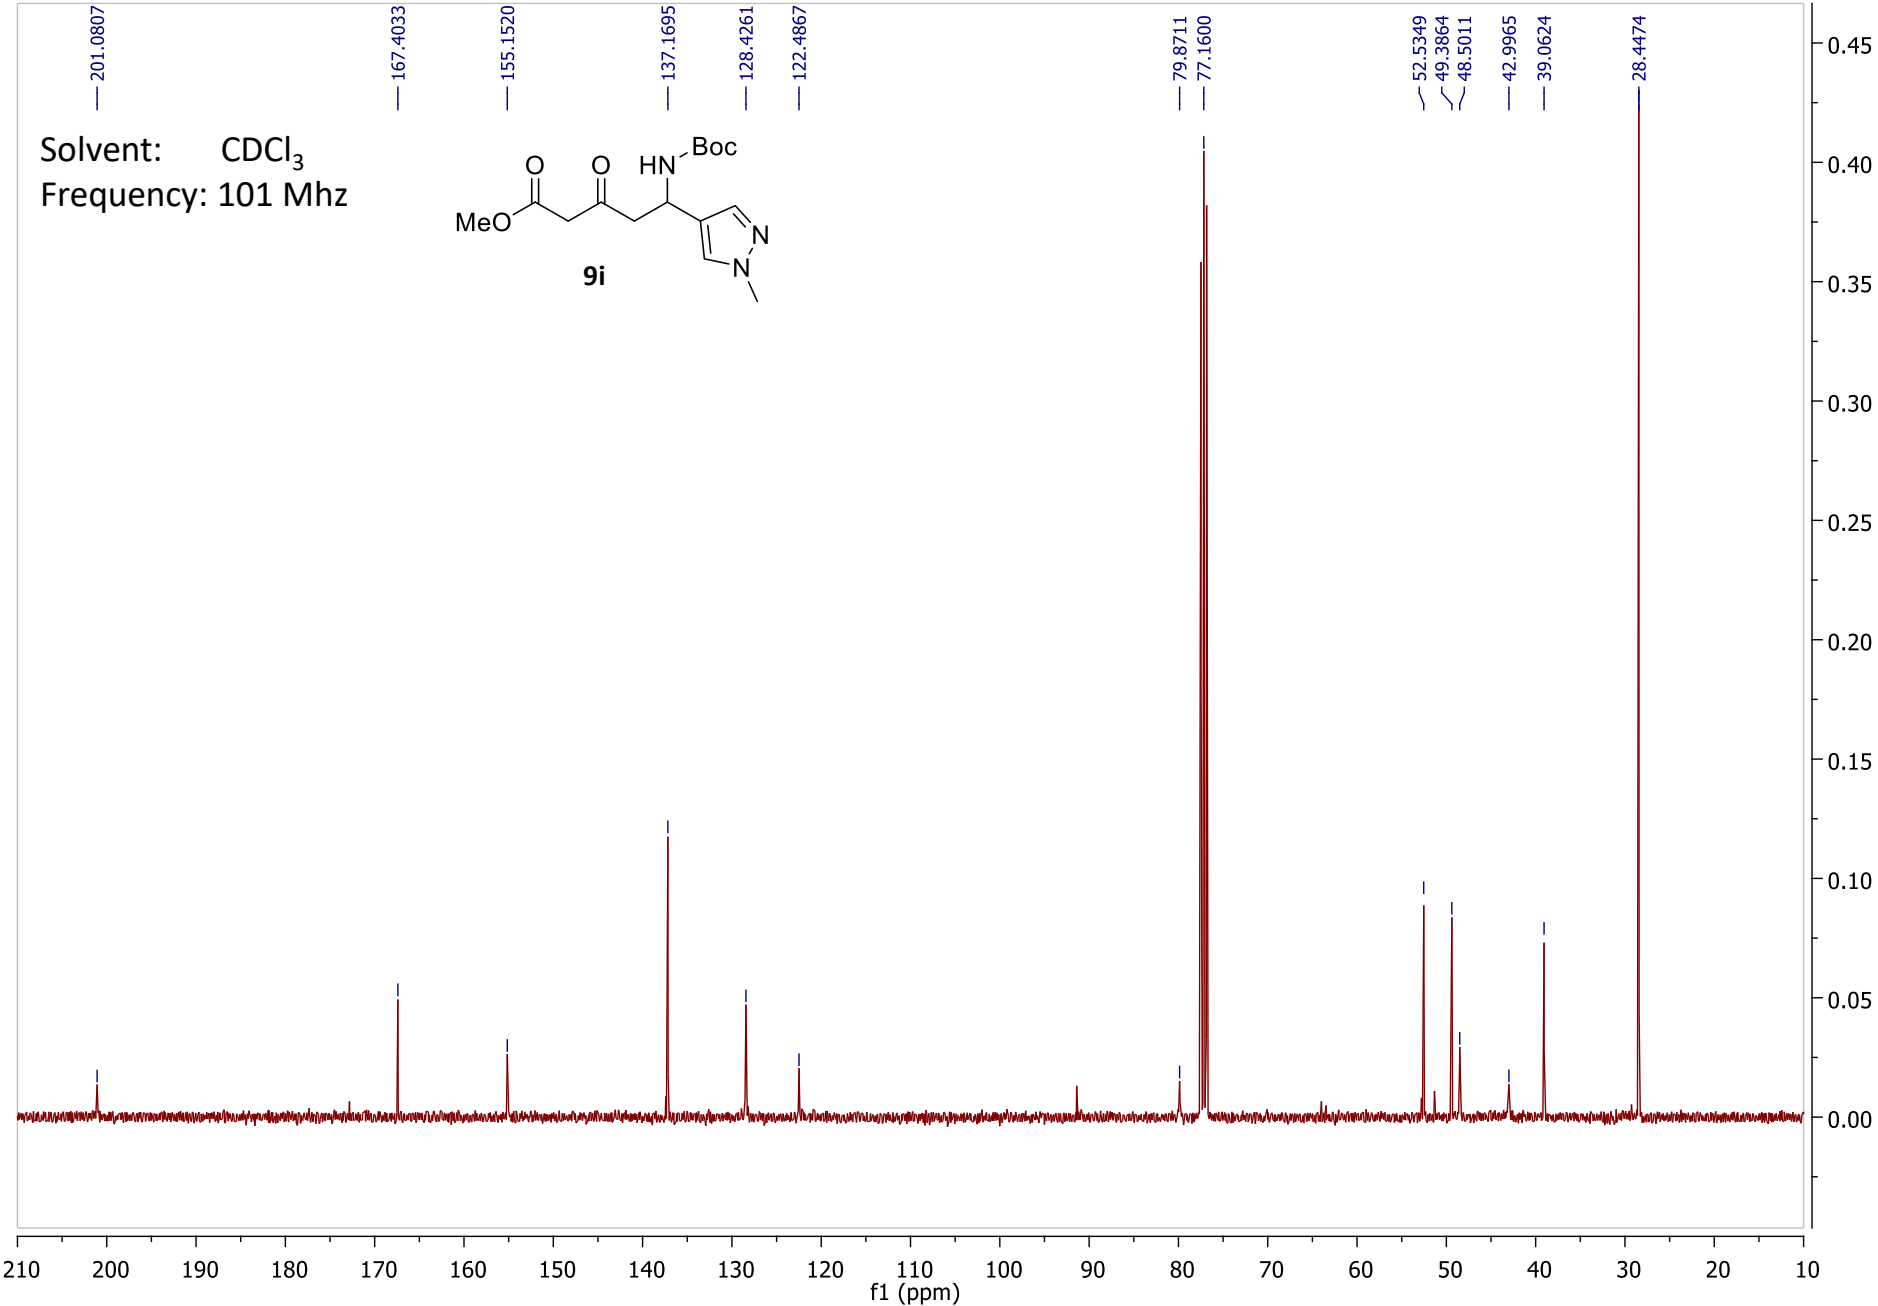

Solvent: CDCl<sub>3</sub>  
Frequency: 400 Mhz

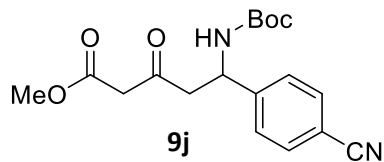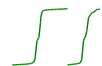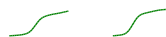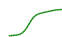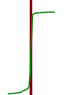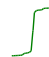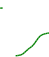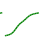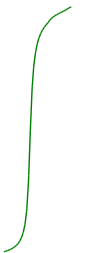

2.06  
2.04

0.91

0.97

3.00

1.76

0.85

0.84

9.00

Solvent: CDCl<sub>3</sub>  
Frequency: 101 Mhz

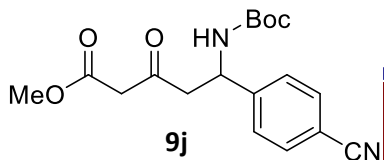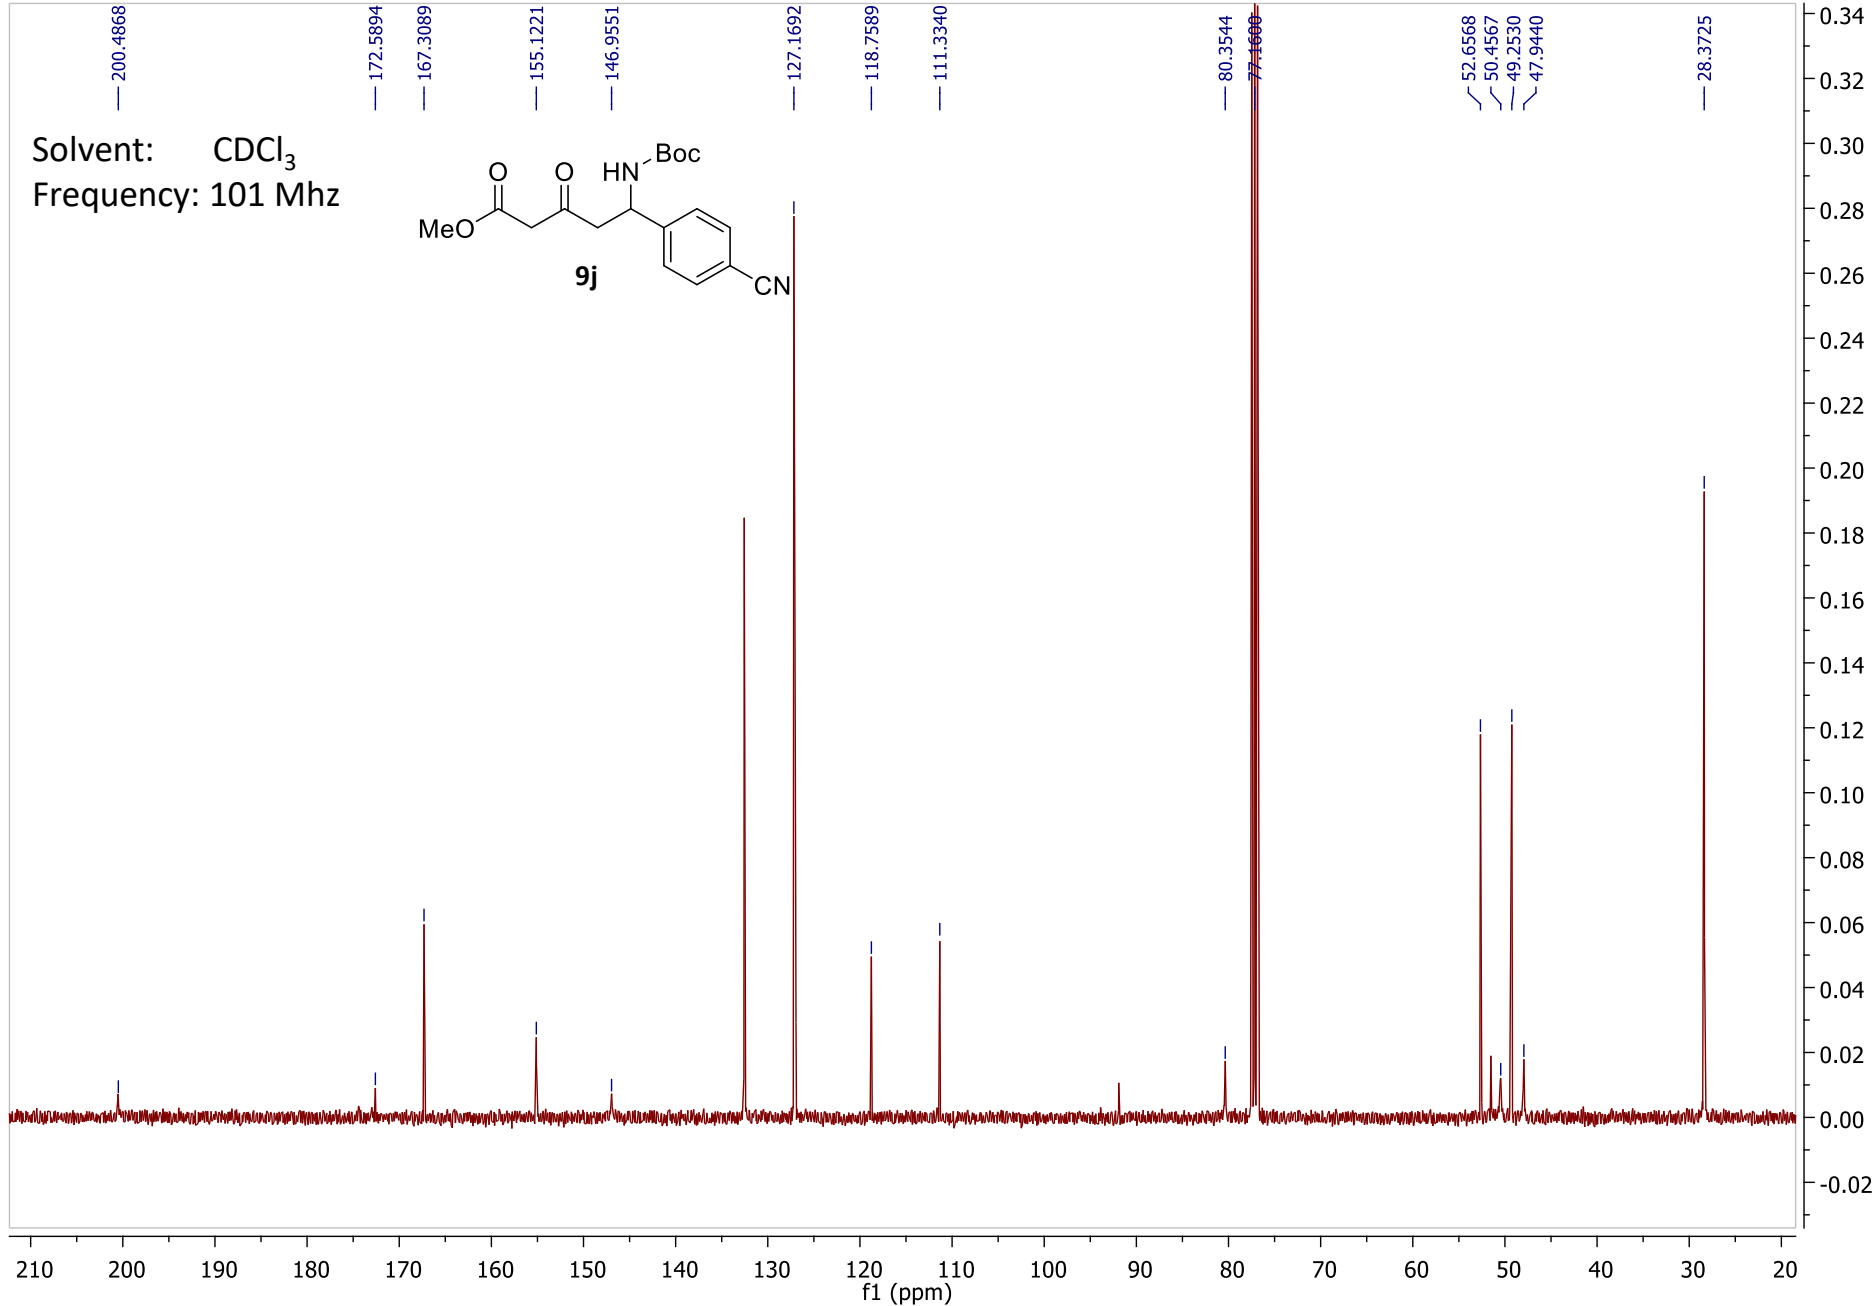

Solvent: CDCl<sub>3</sub>  
Frequency: 500 Mhz

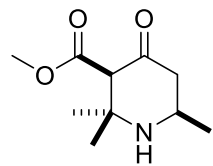

**11a**  
Mixture of  
diastereomers

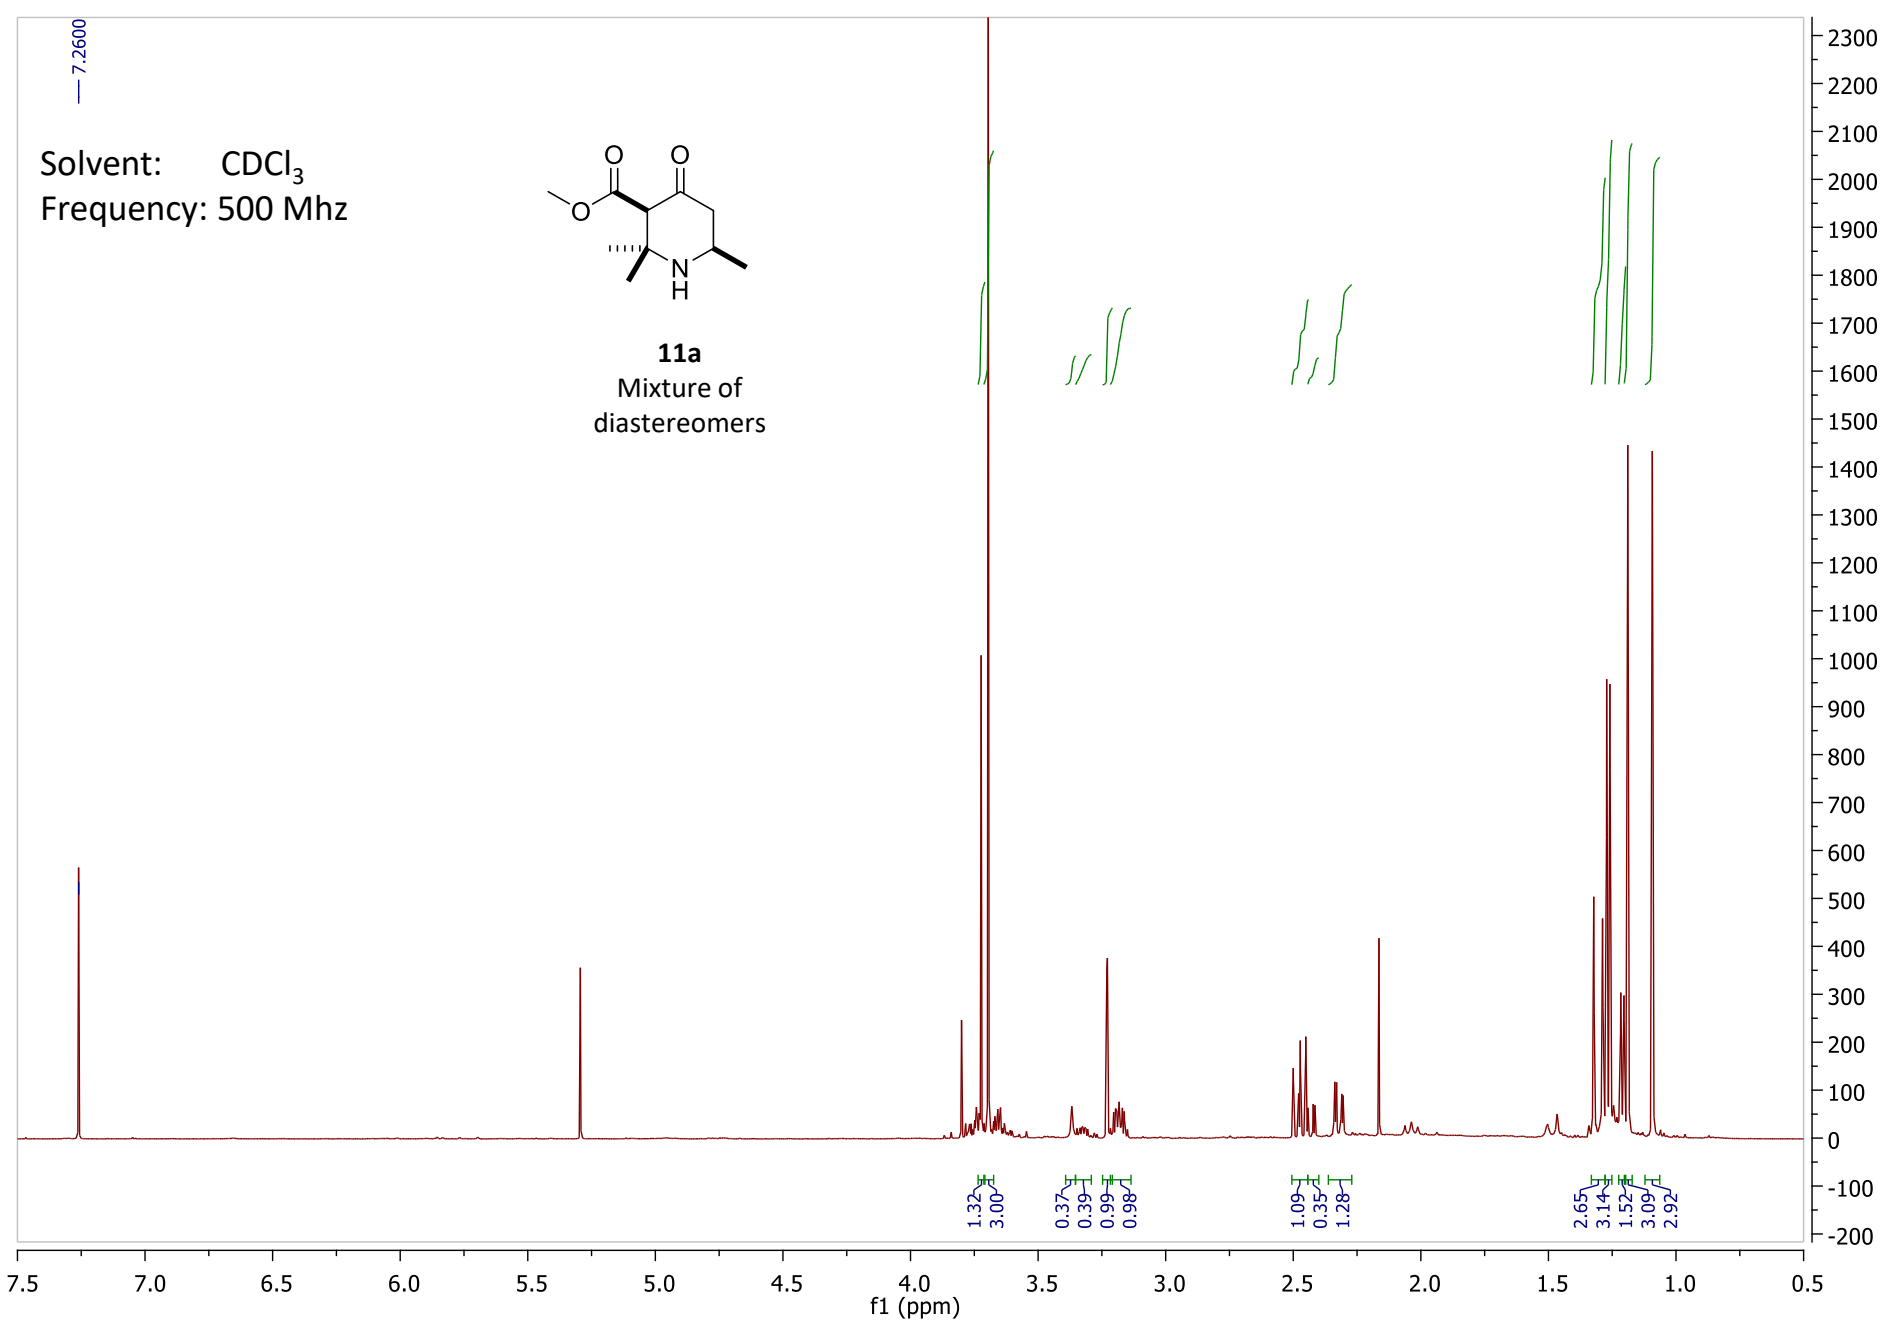

Solvent:  $\text{CDCl}_3$   
Frequency: 101 Mhz

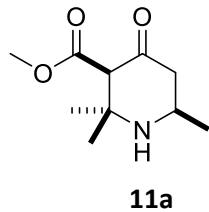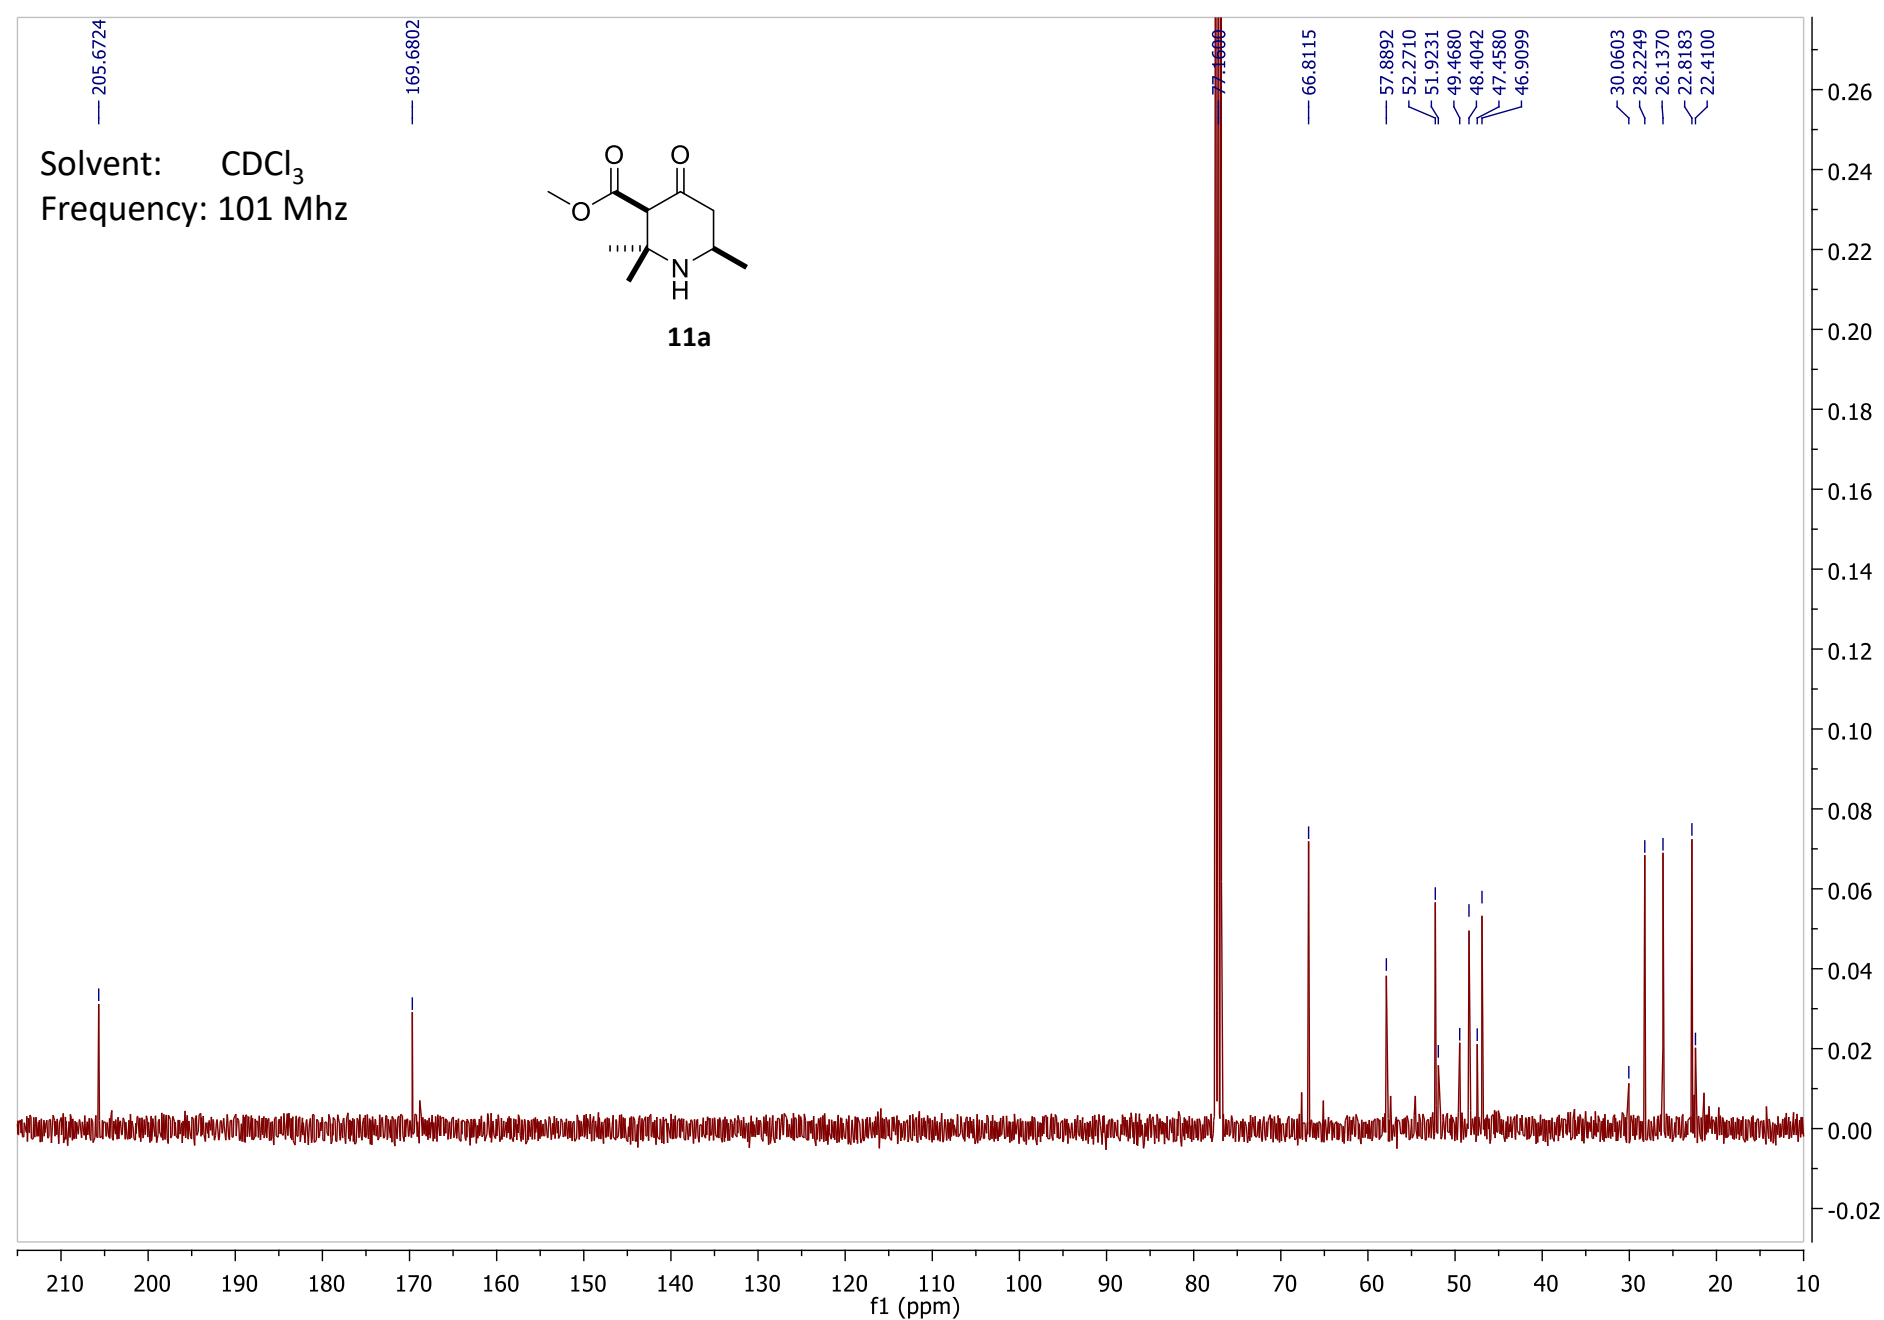

— 7.2600

Solvent:  $\text{CDCl}_3$   
Frequency: 500 Mhz

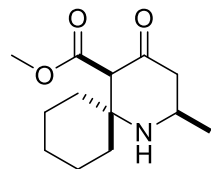

**11b**  
Mixture of  
diastereomers

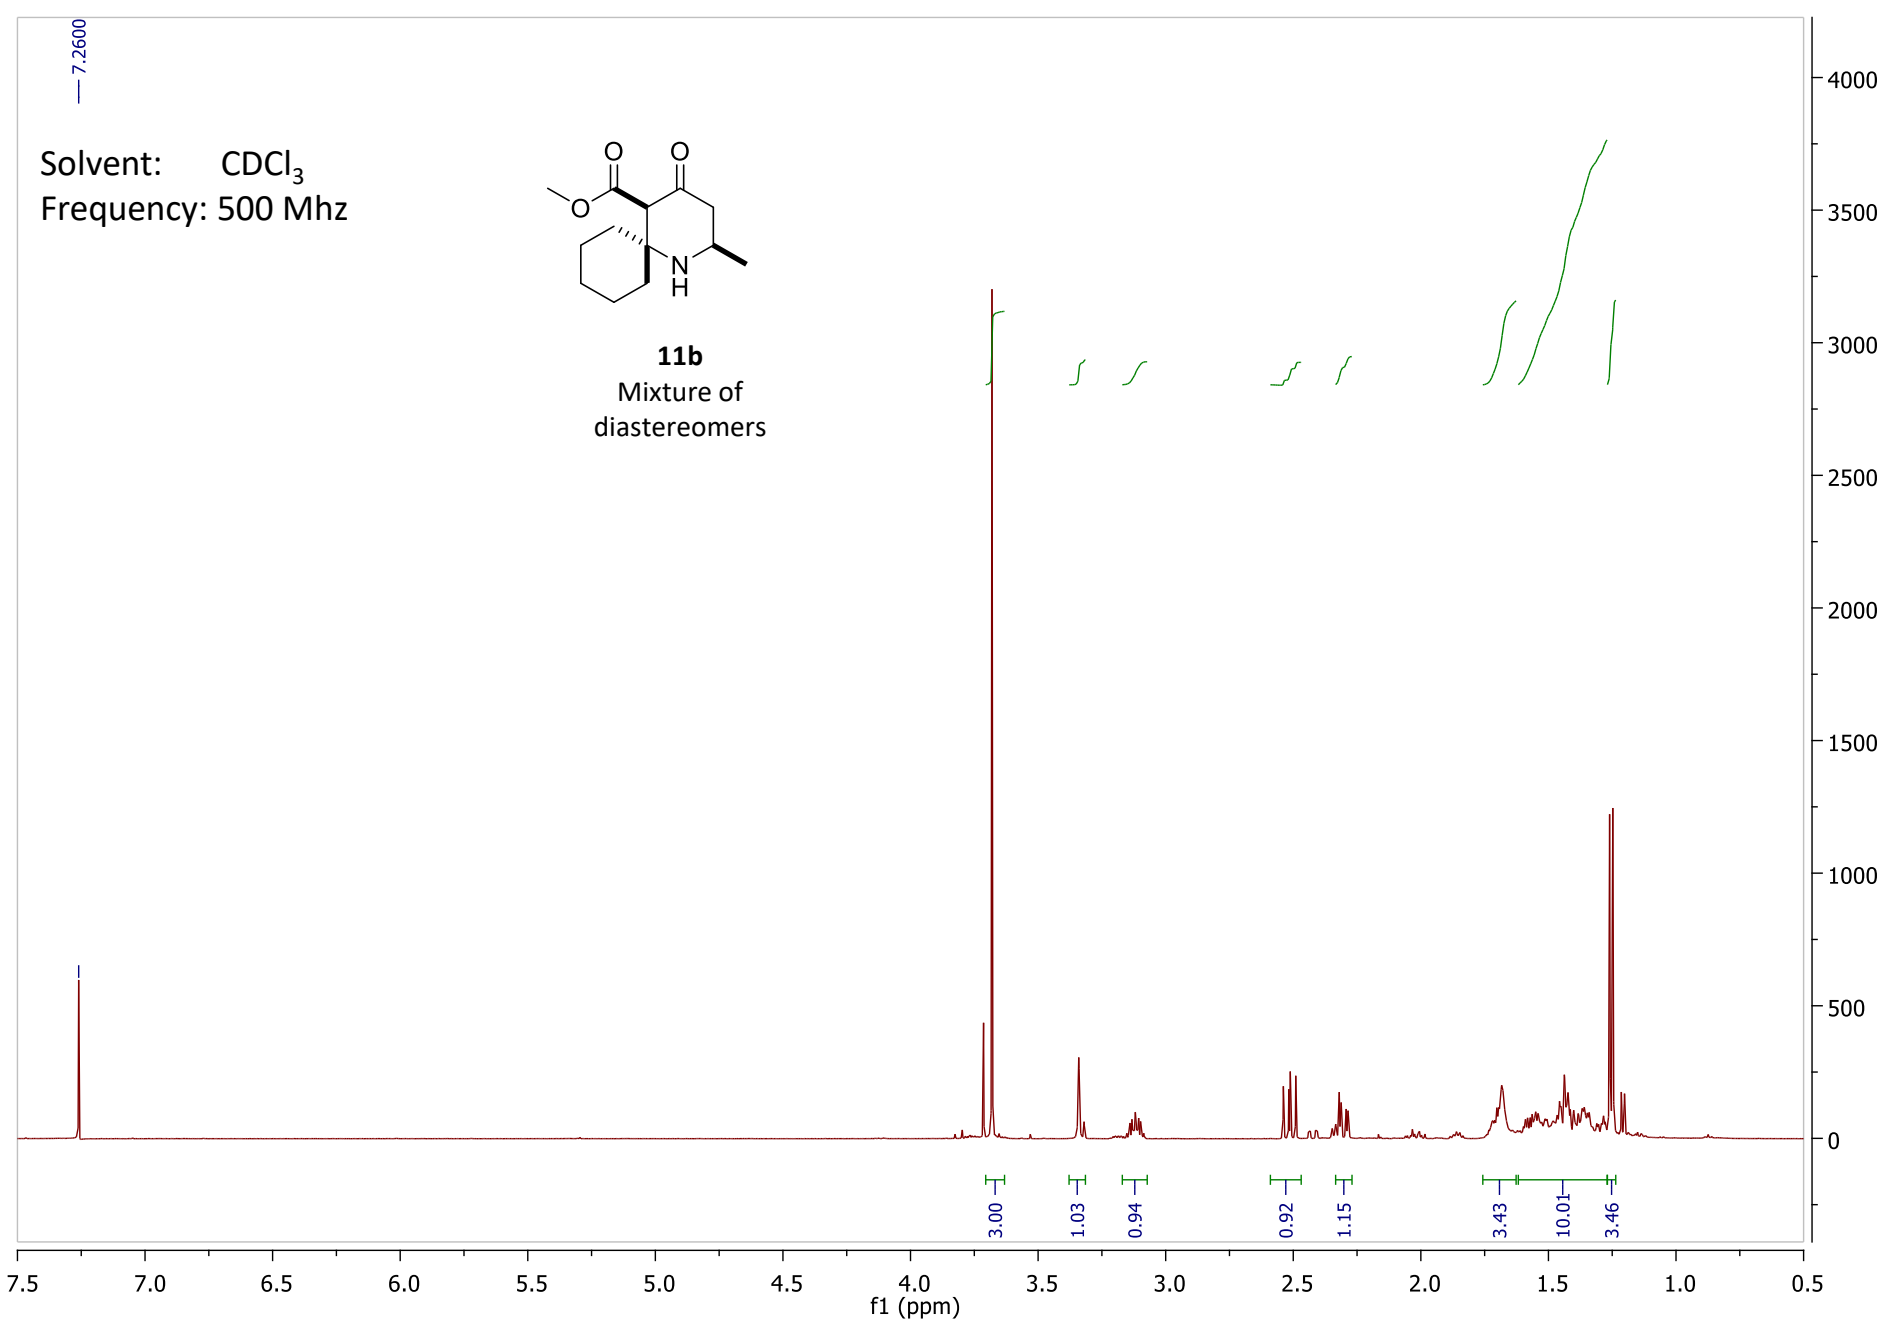

Solvent:  $\text{CDCl}_3$   
Frequency: 101 Mhz

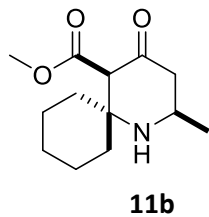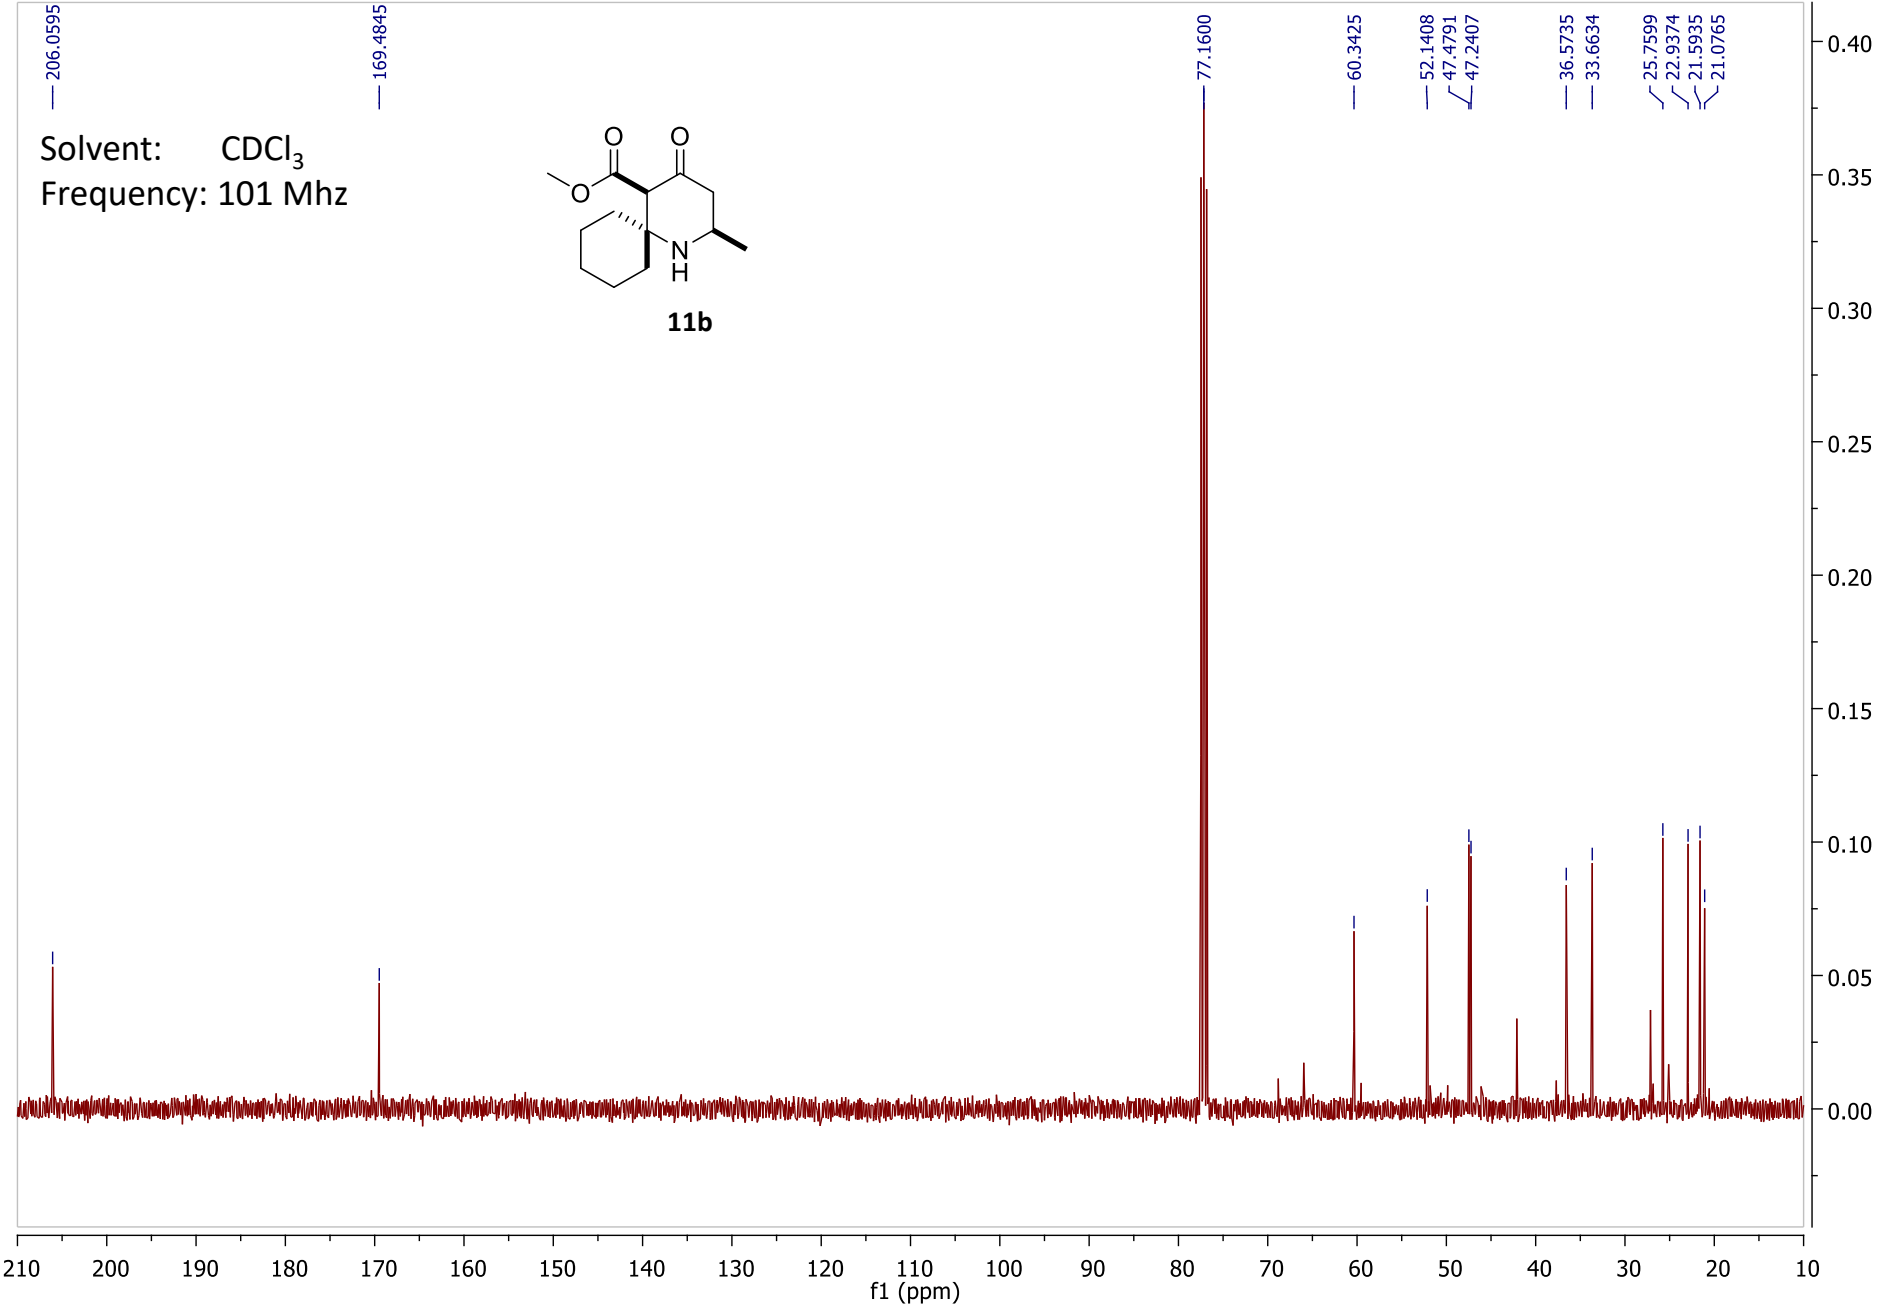



— 7.2600

Solvent:  $\text{CDCl}_3$   
Frequency: 400 Mhz

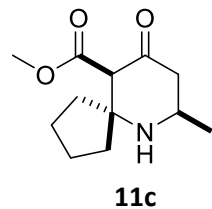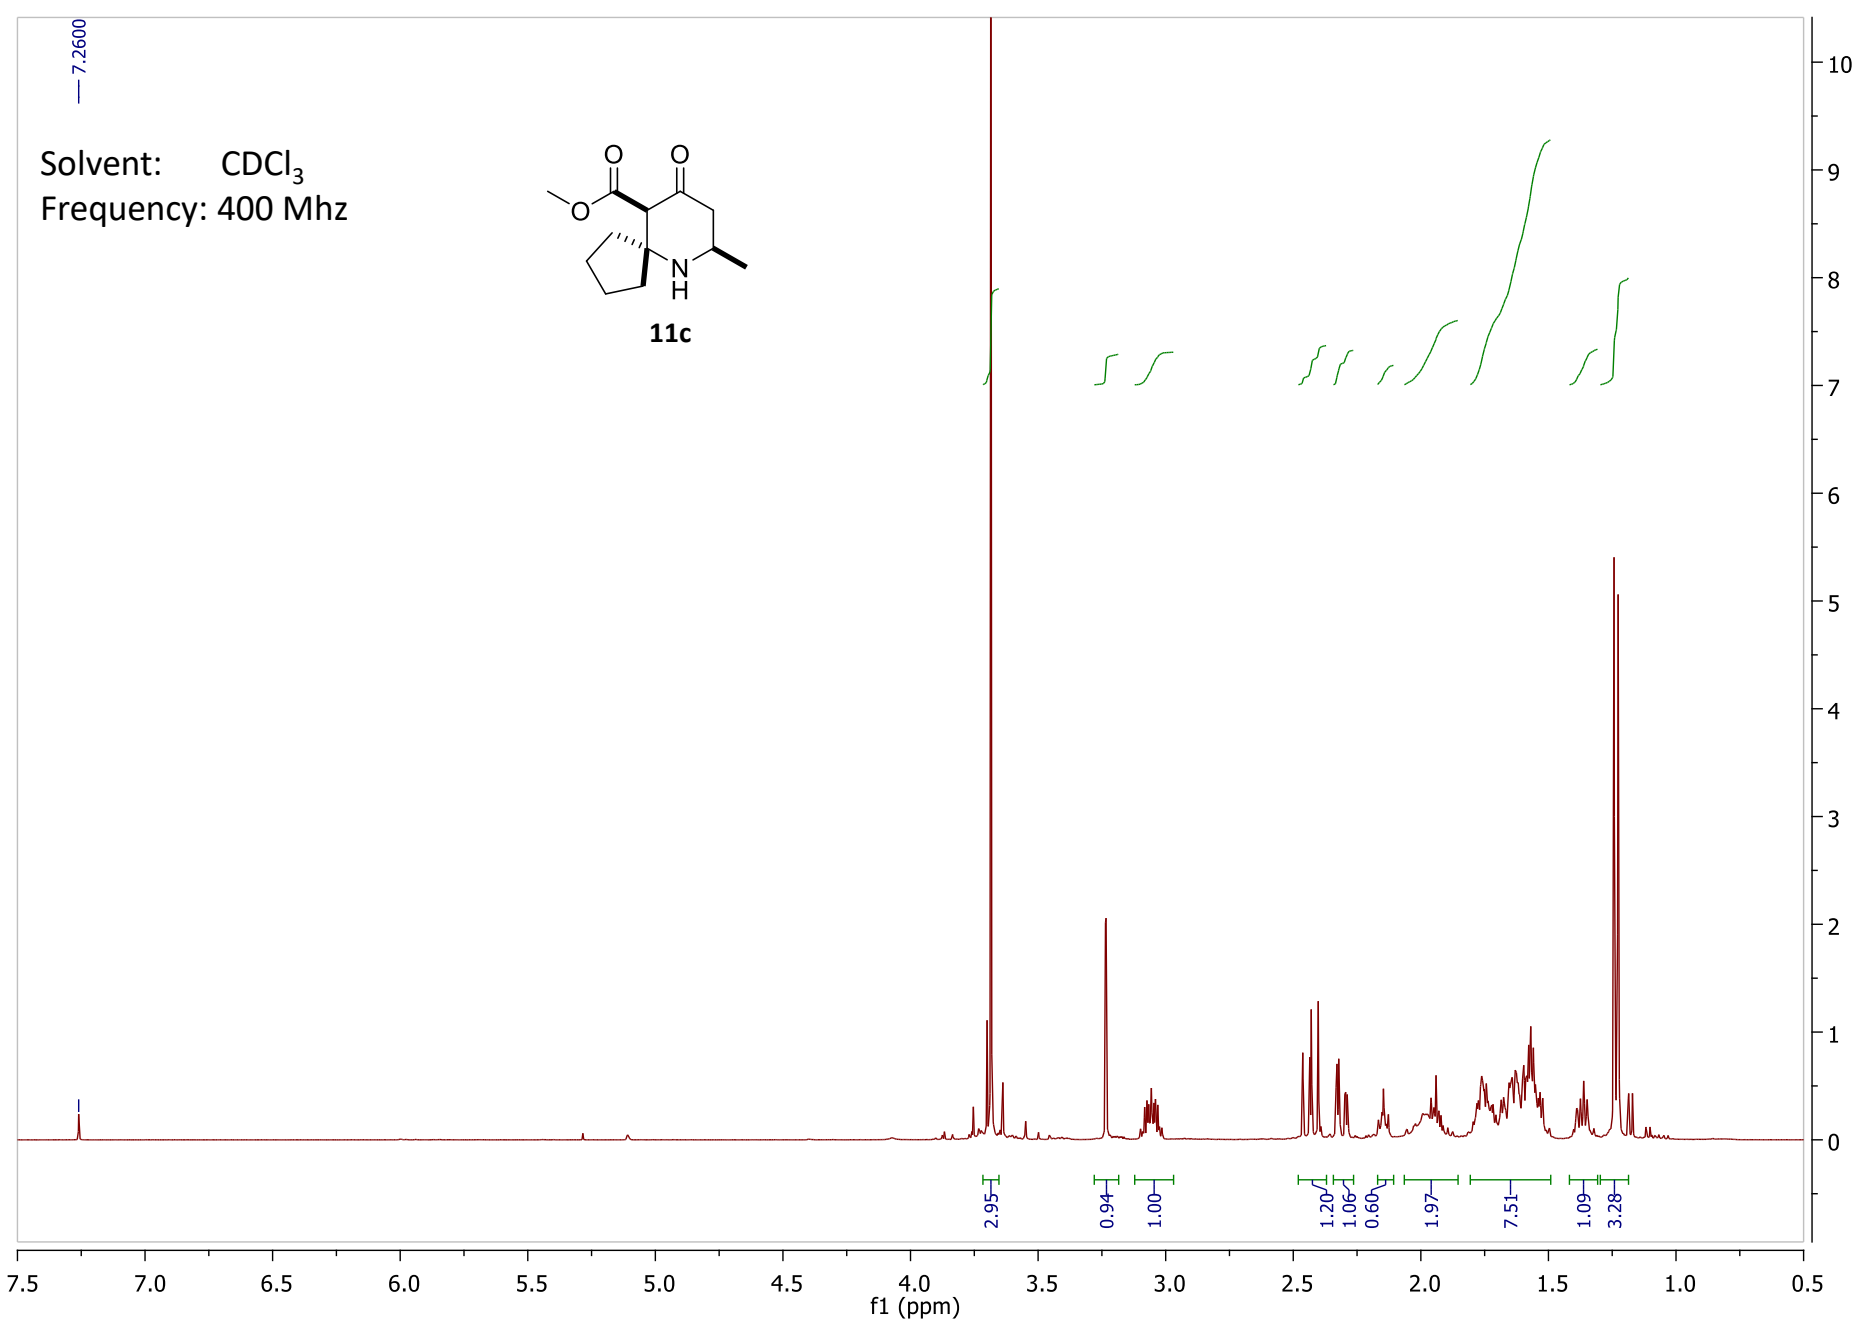

Solvent: CDCl<sub>3</sub>  
Frequency: 101 Mhz

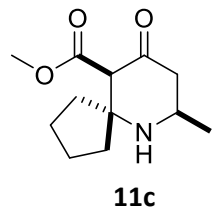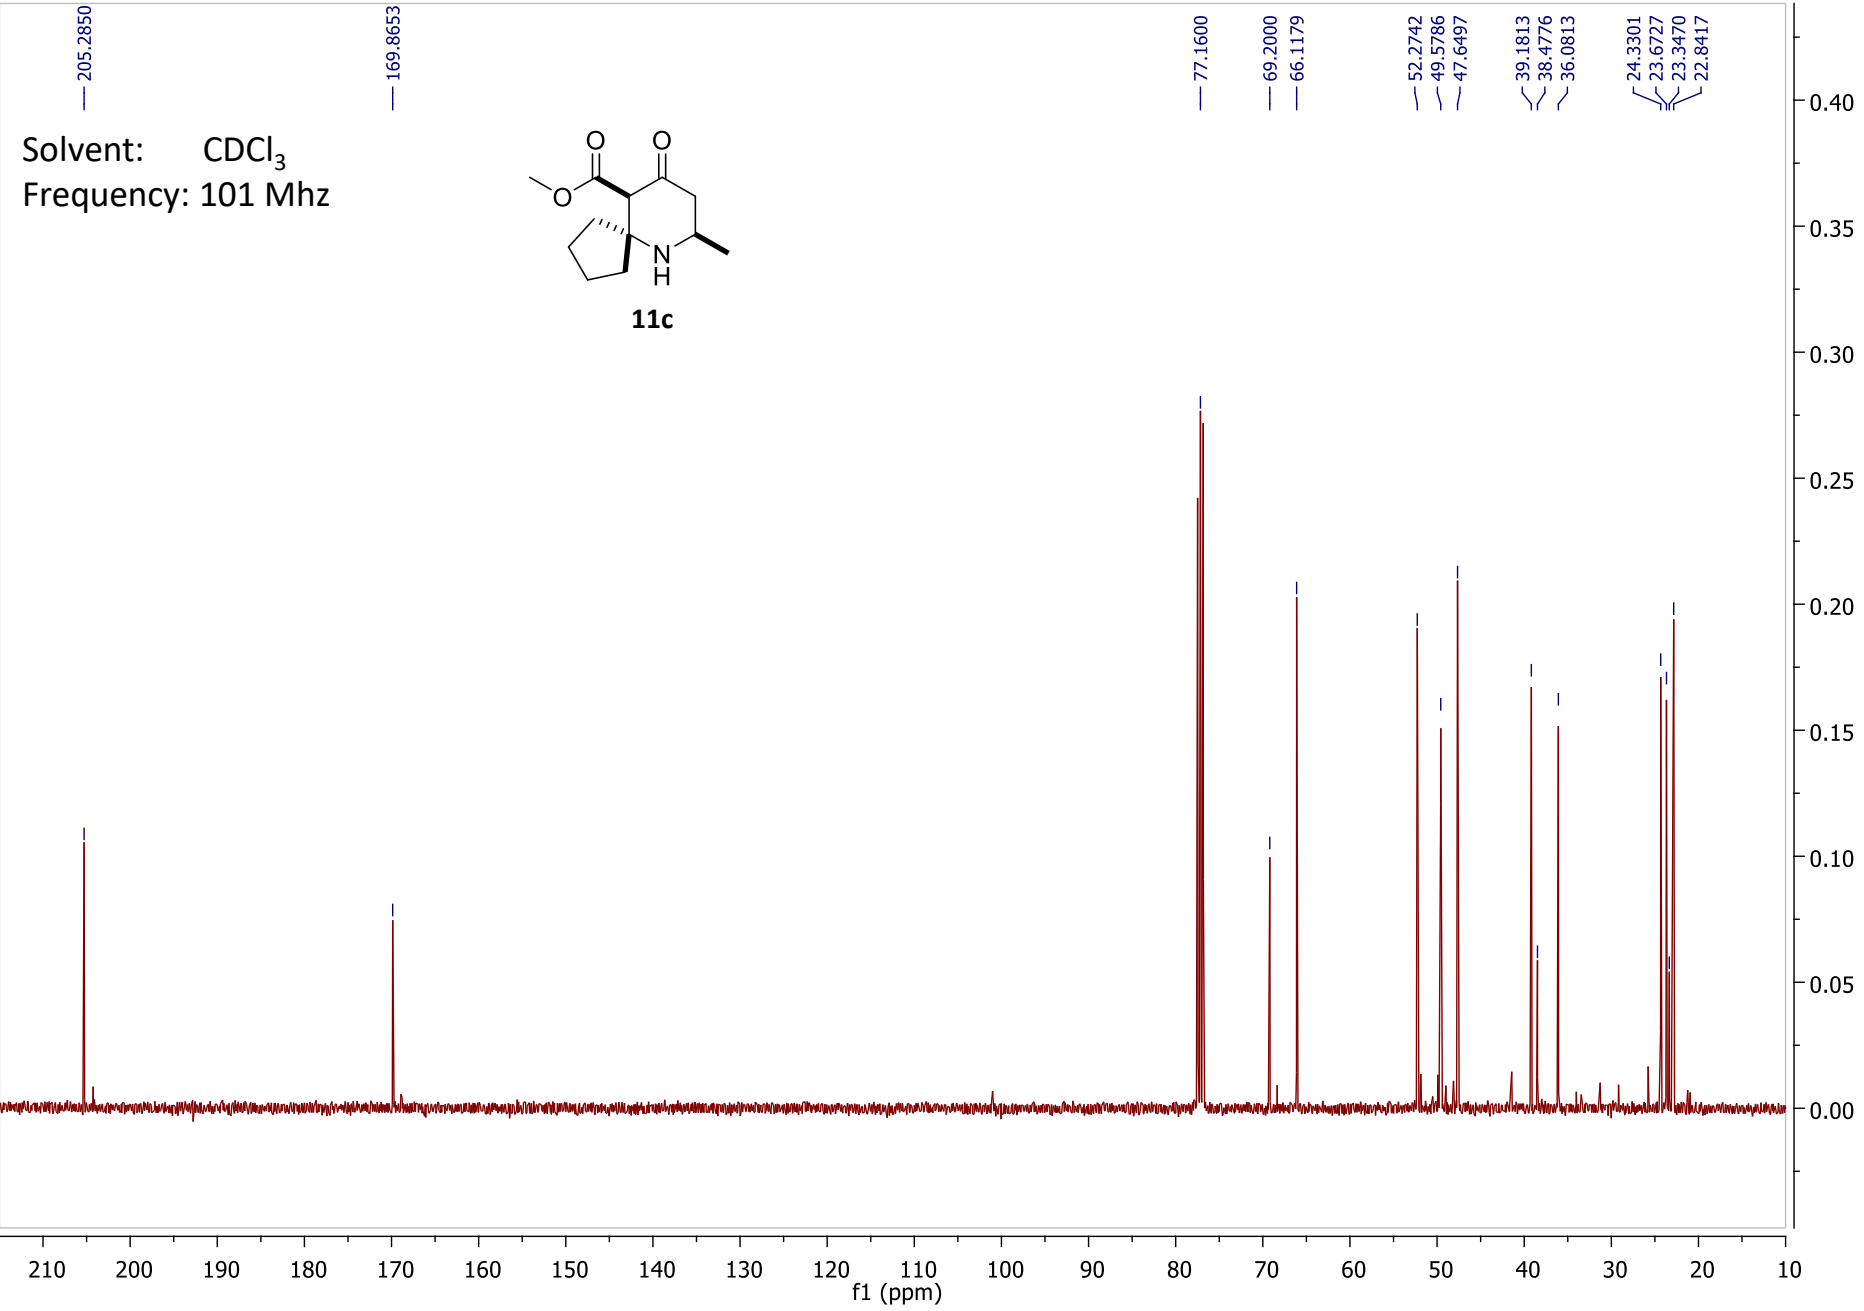

— 7.2600

Solvent:  $\text{CDCl}_3$   
Frequency: 400 Mhz

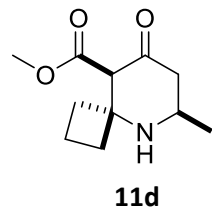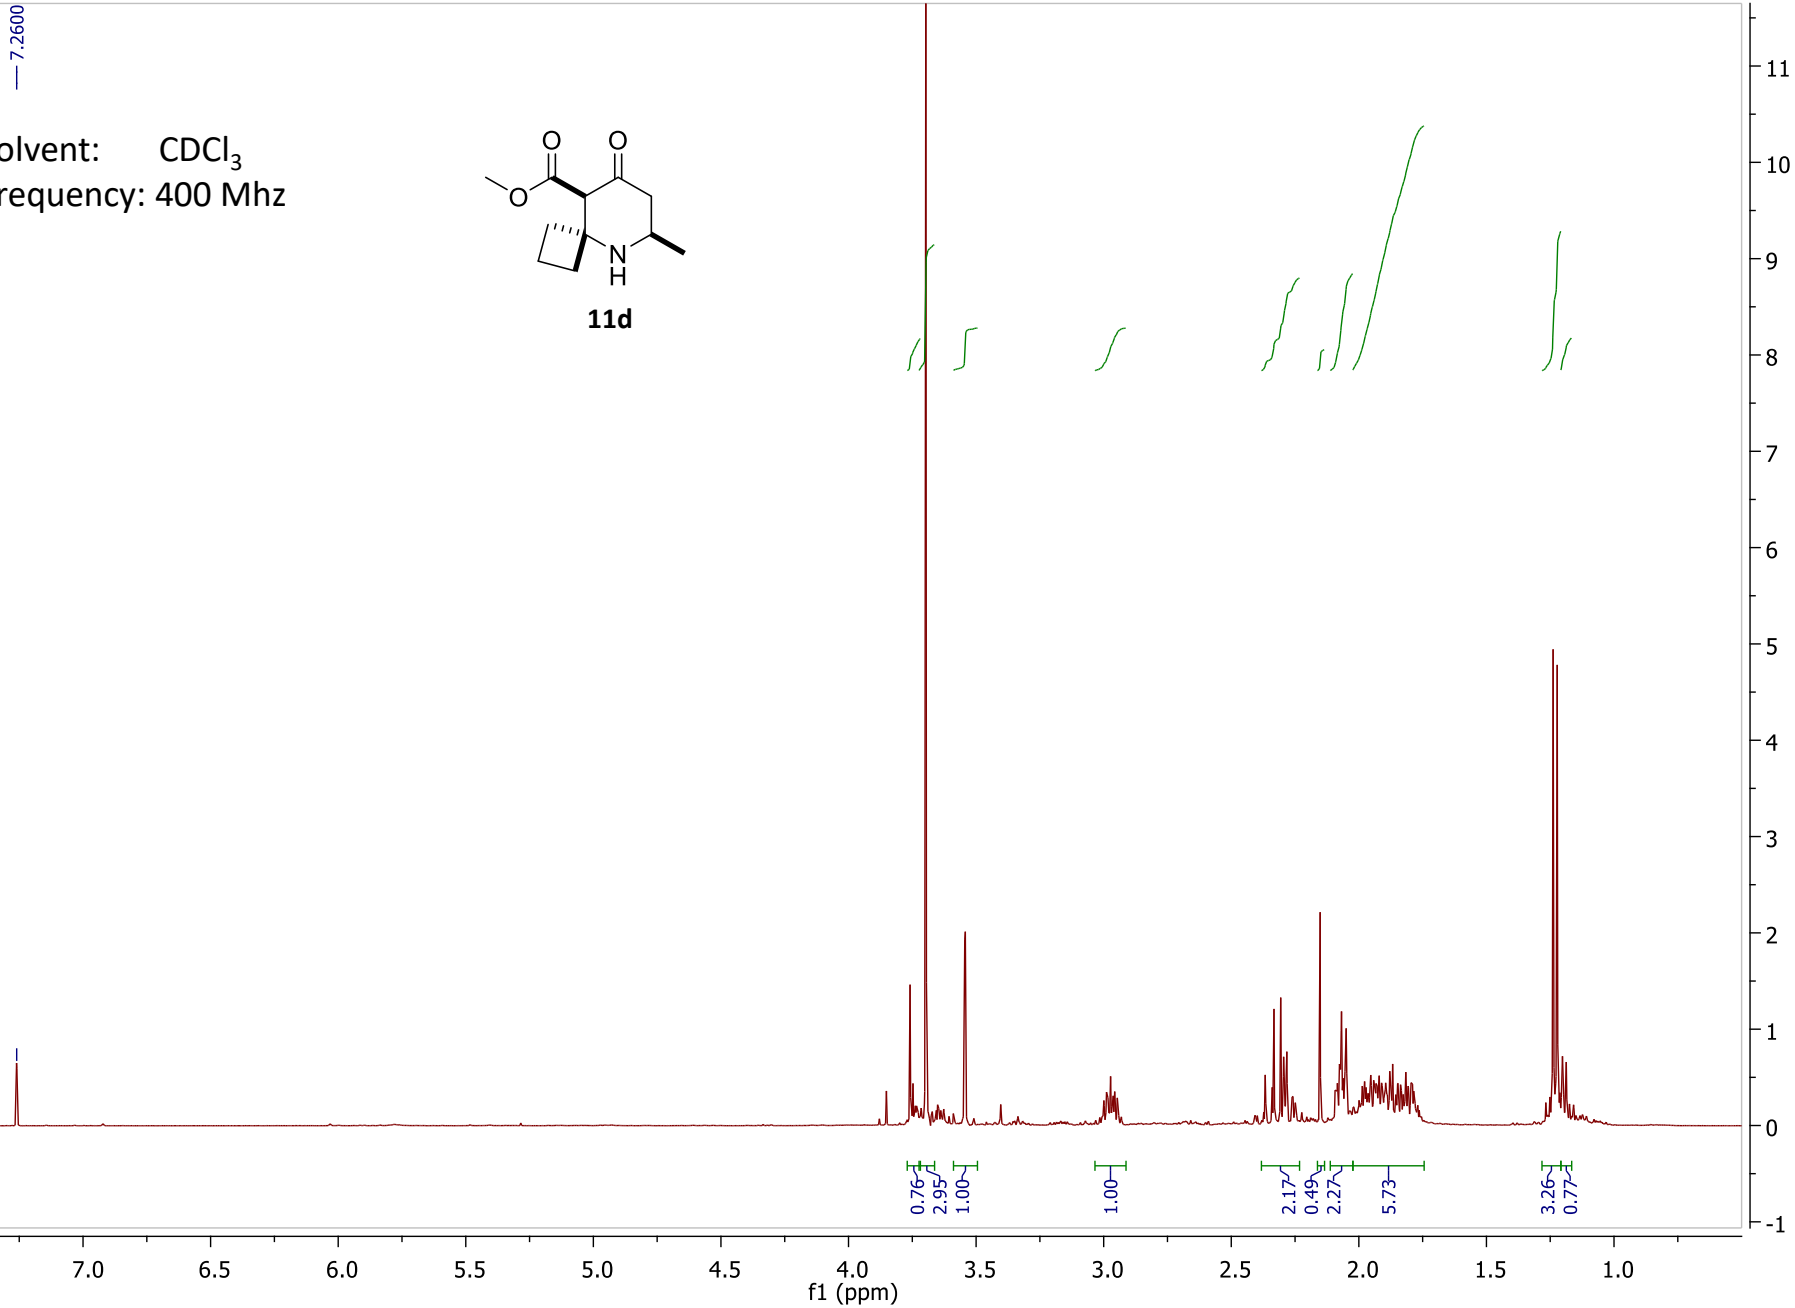

Solvent: CDCl<sub>3</sub>  
Frequency: 101 Mhz

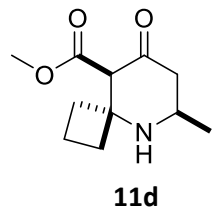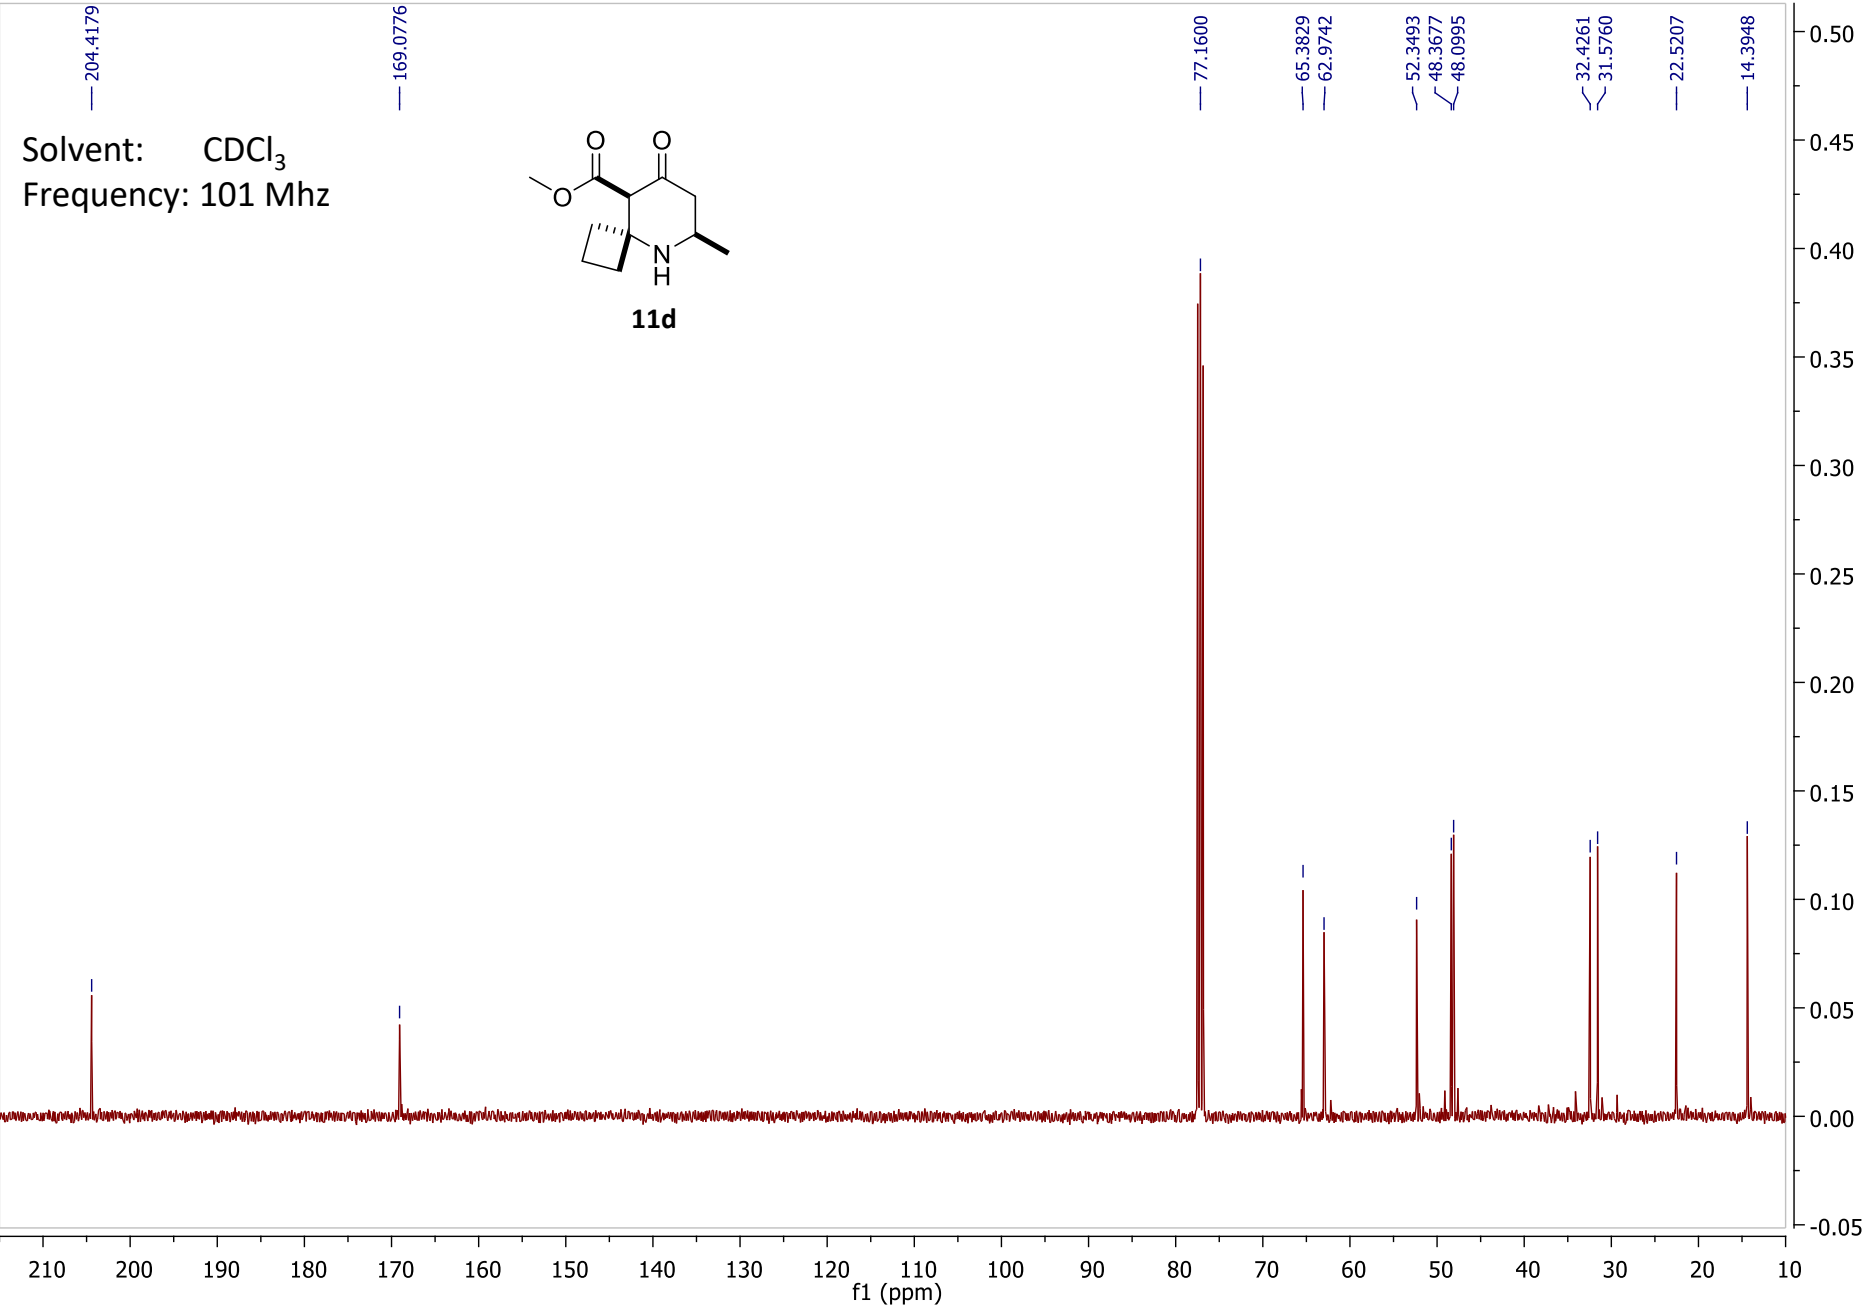

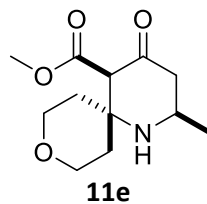

Solvent:  $\text{CDCl}_3$   
Frequency: 400 Mhz

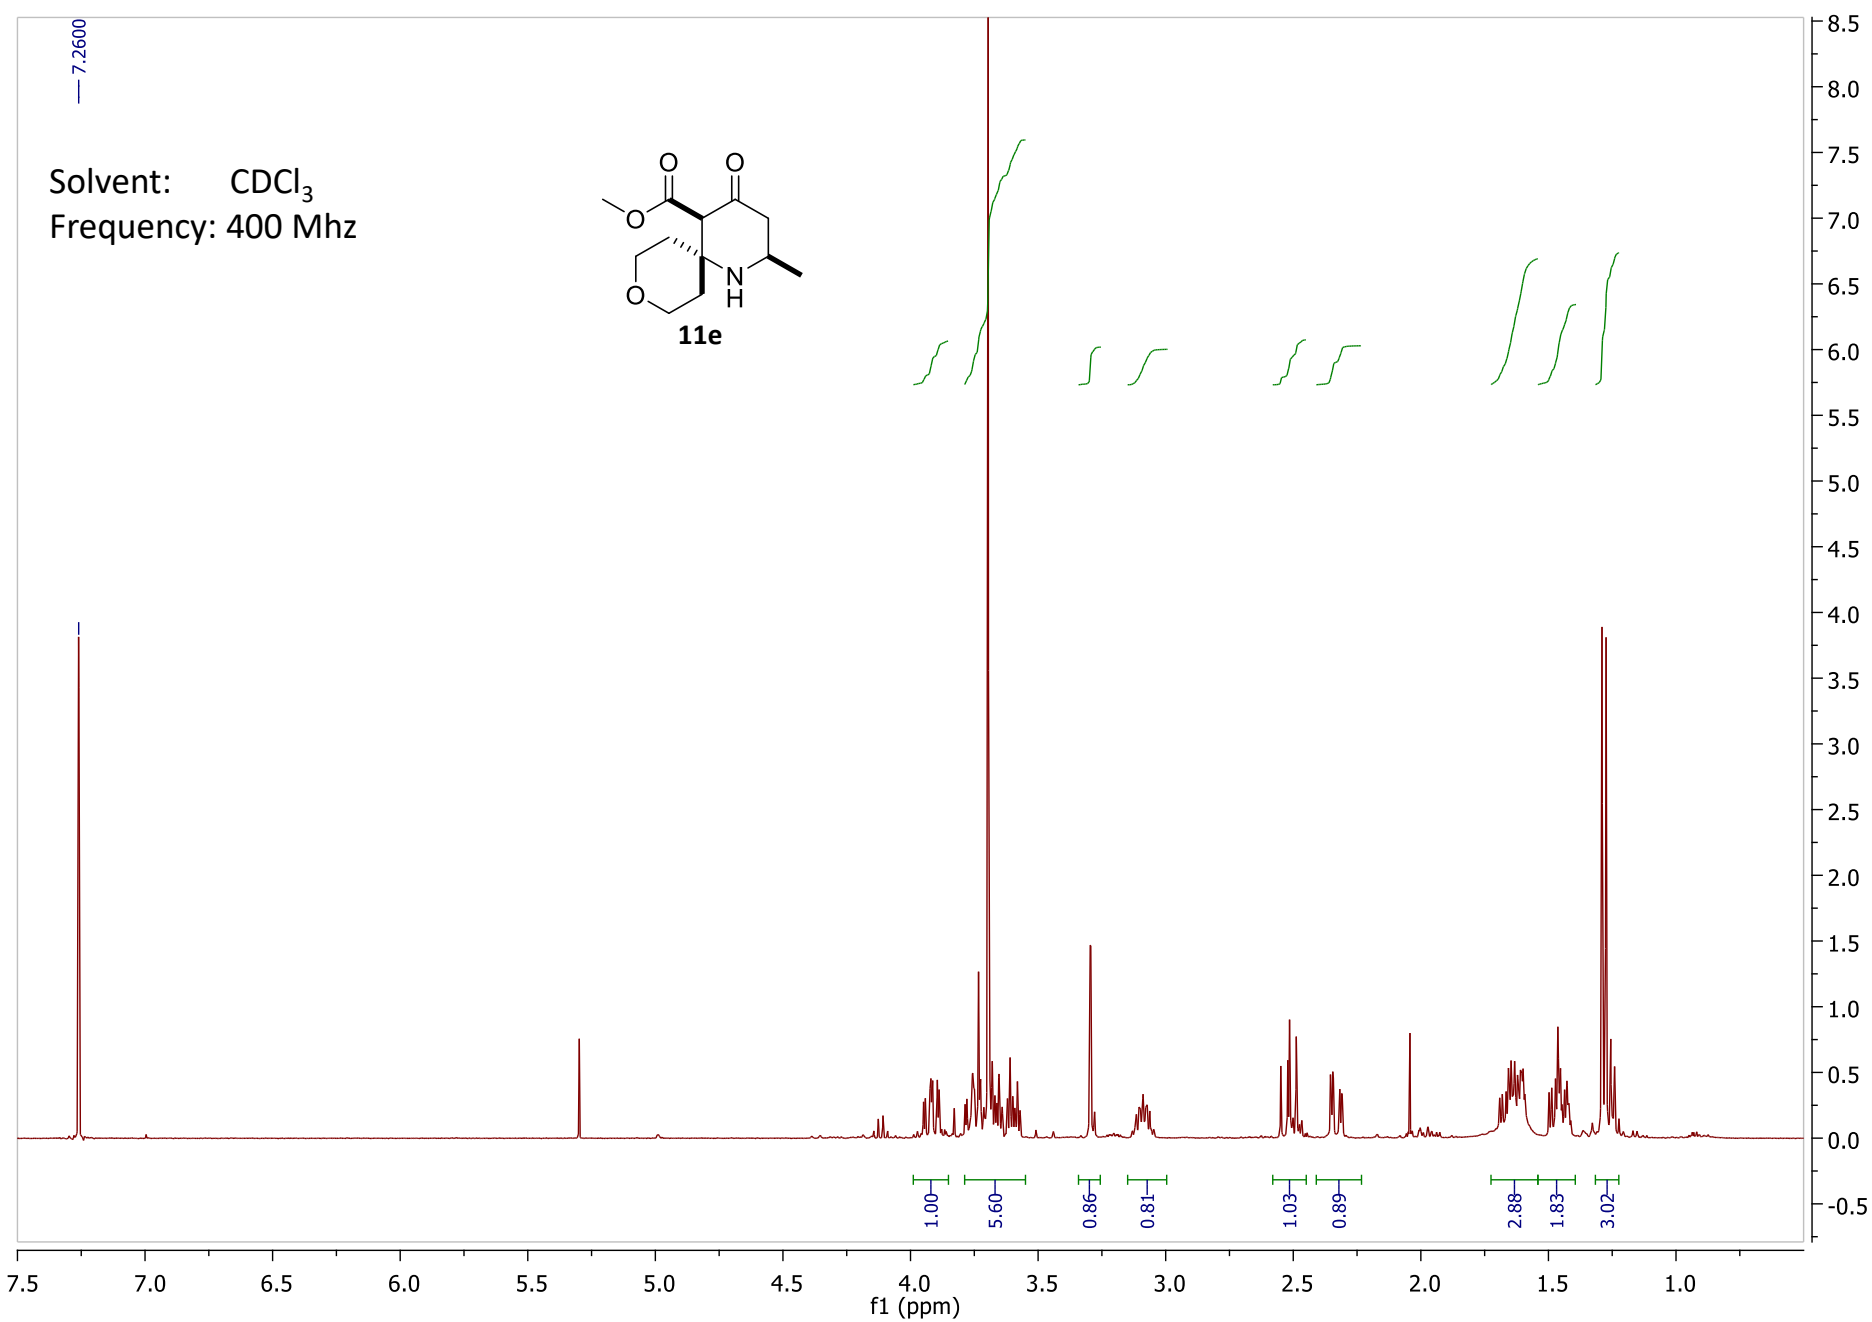

Solvent:  $\text{CDCl}_3$   
Frequency: 101 Mhz

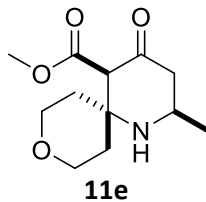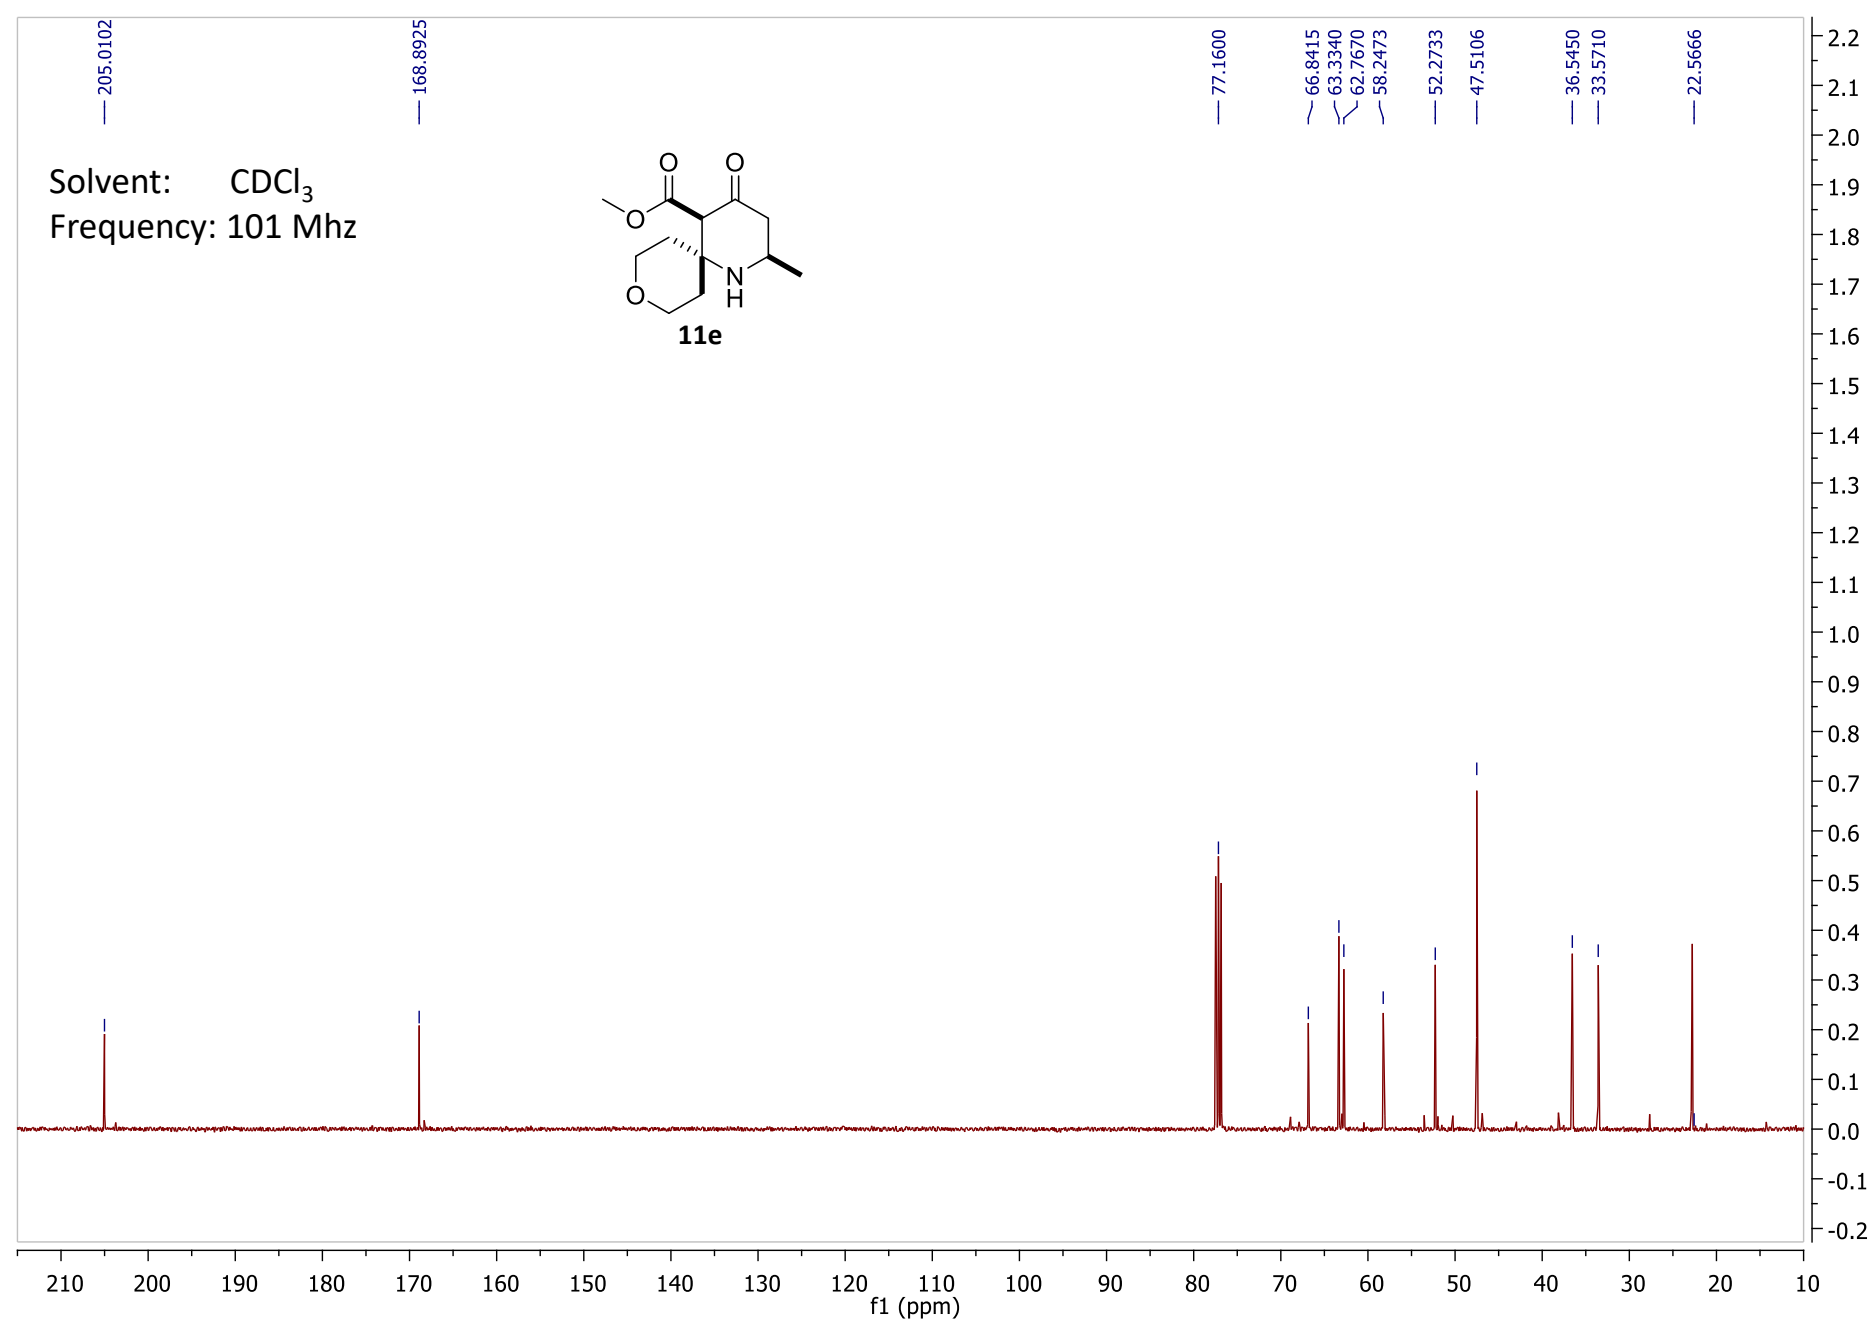

Solvent: CDCl<sub>3</sub>  
Frequency: 400 Mhz

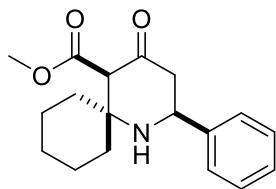

**11f**  
Mixture of  
diastereomers

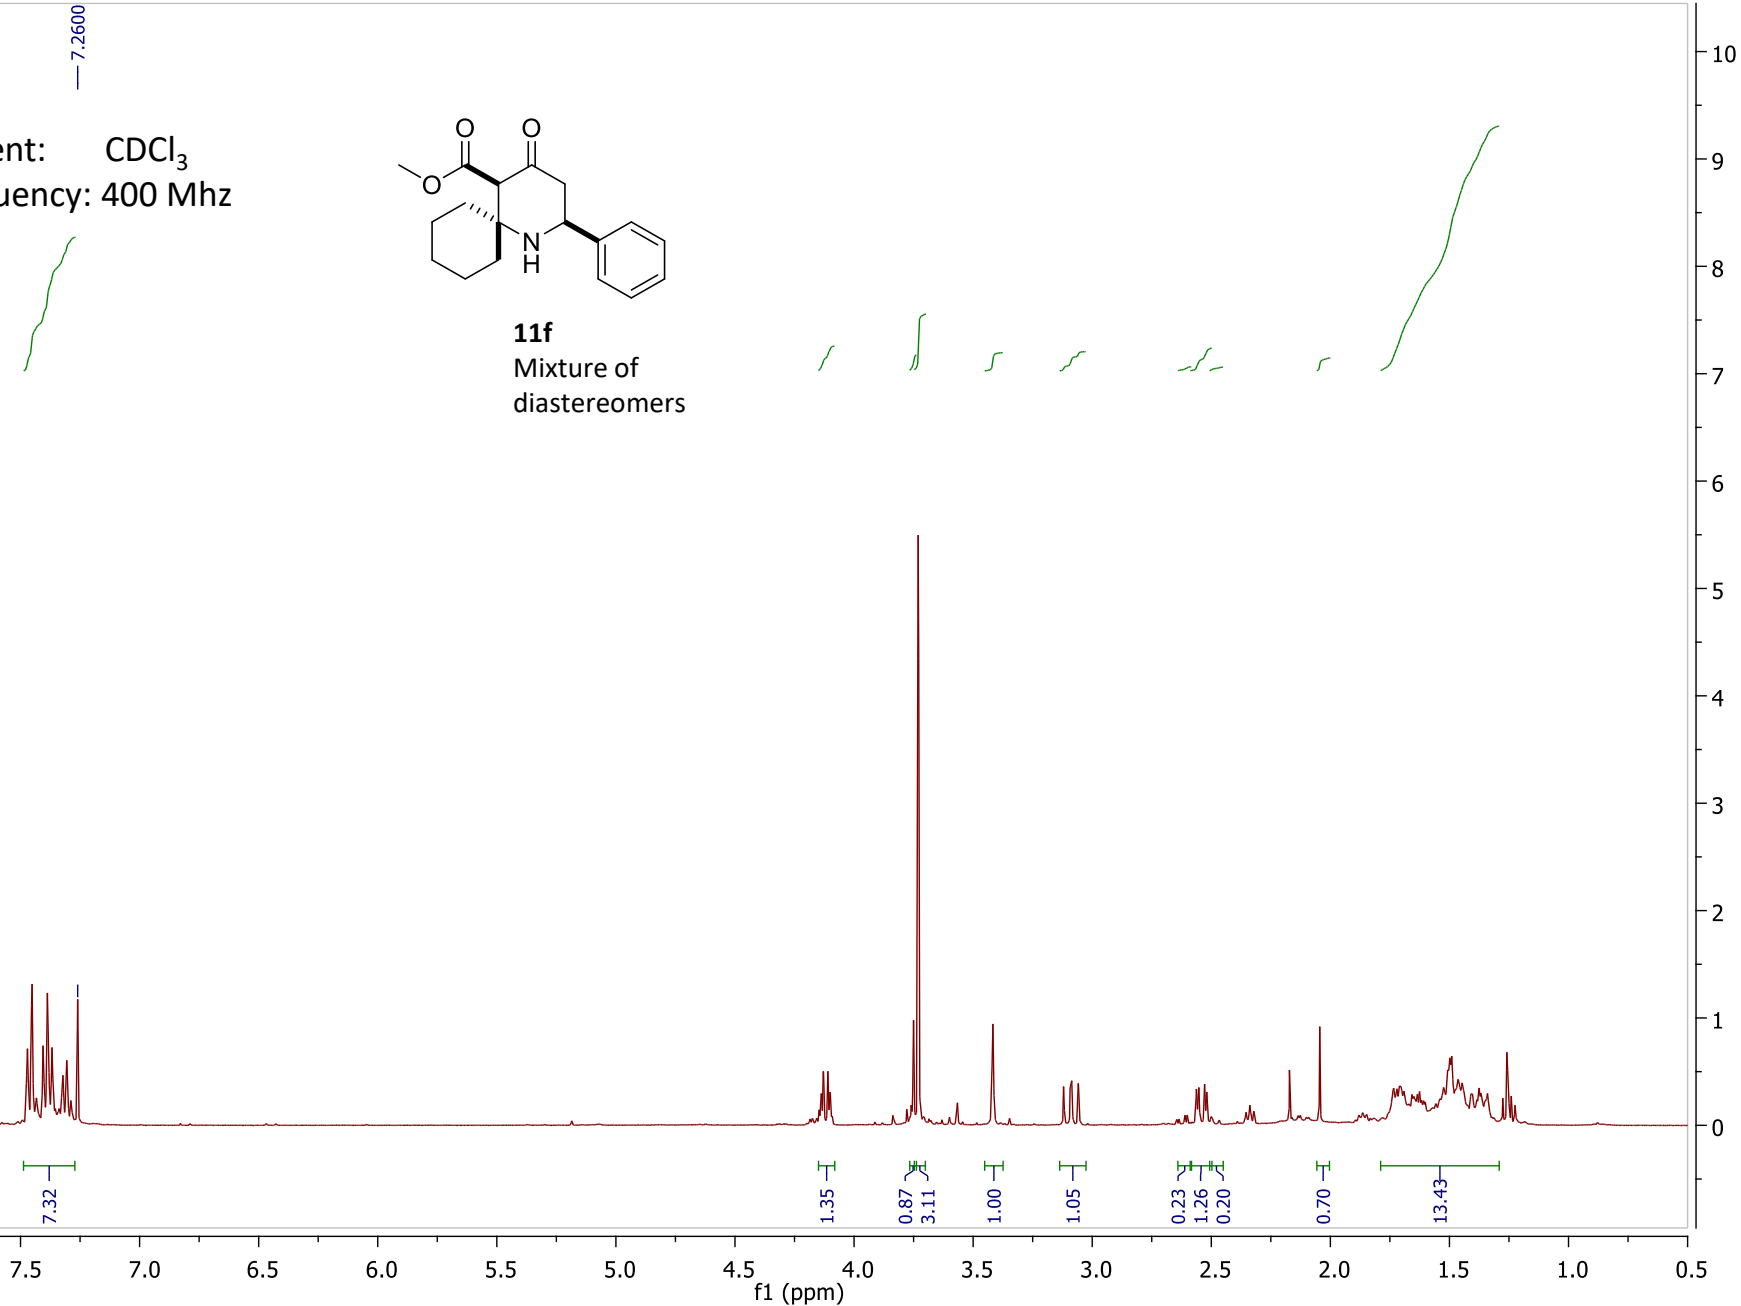

Solvent: CDCl<sub>3</sub>  
Frequency: 101 Mhz

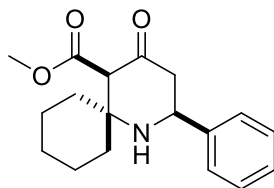

**11f**

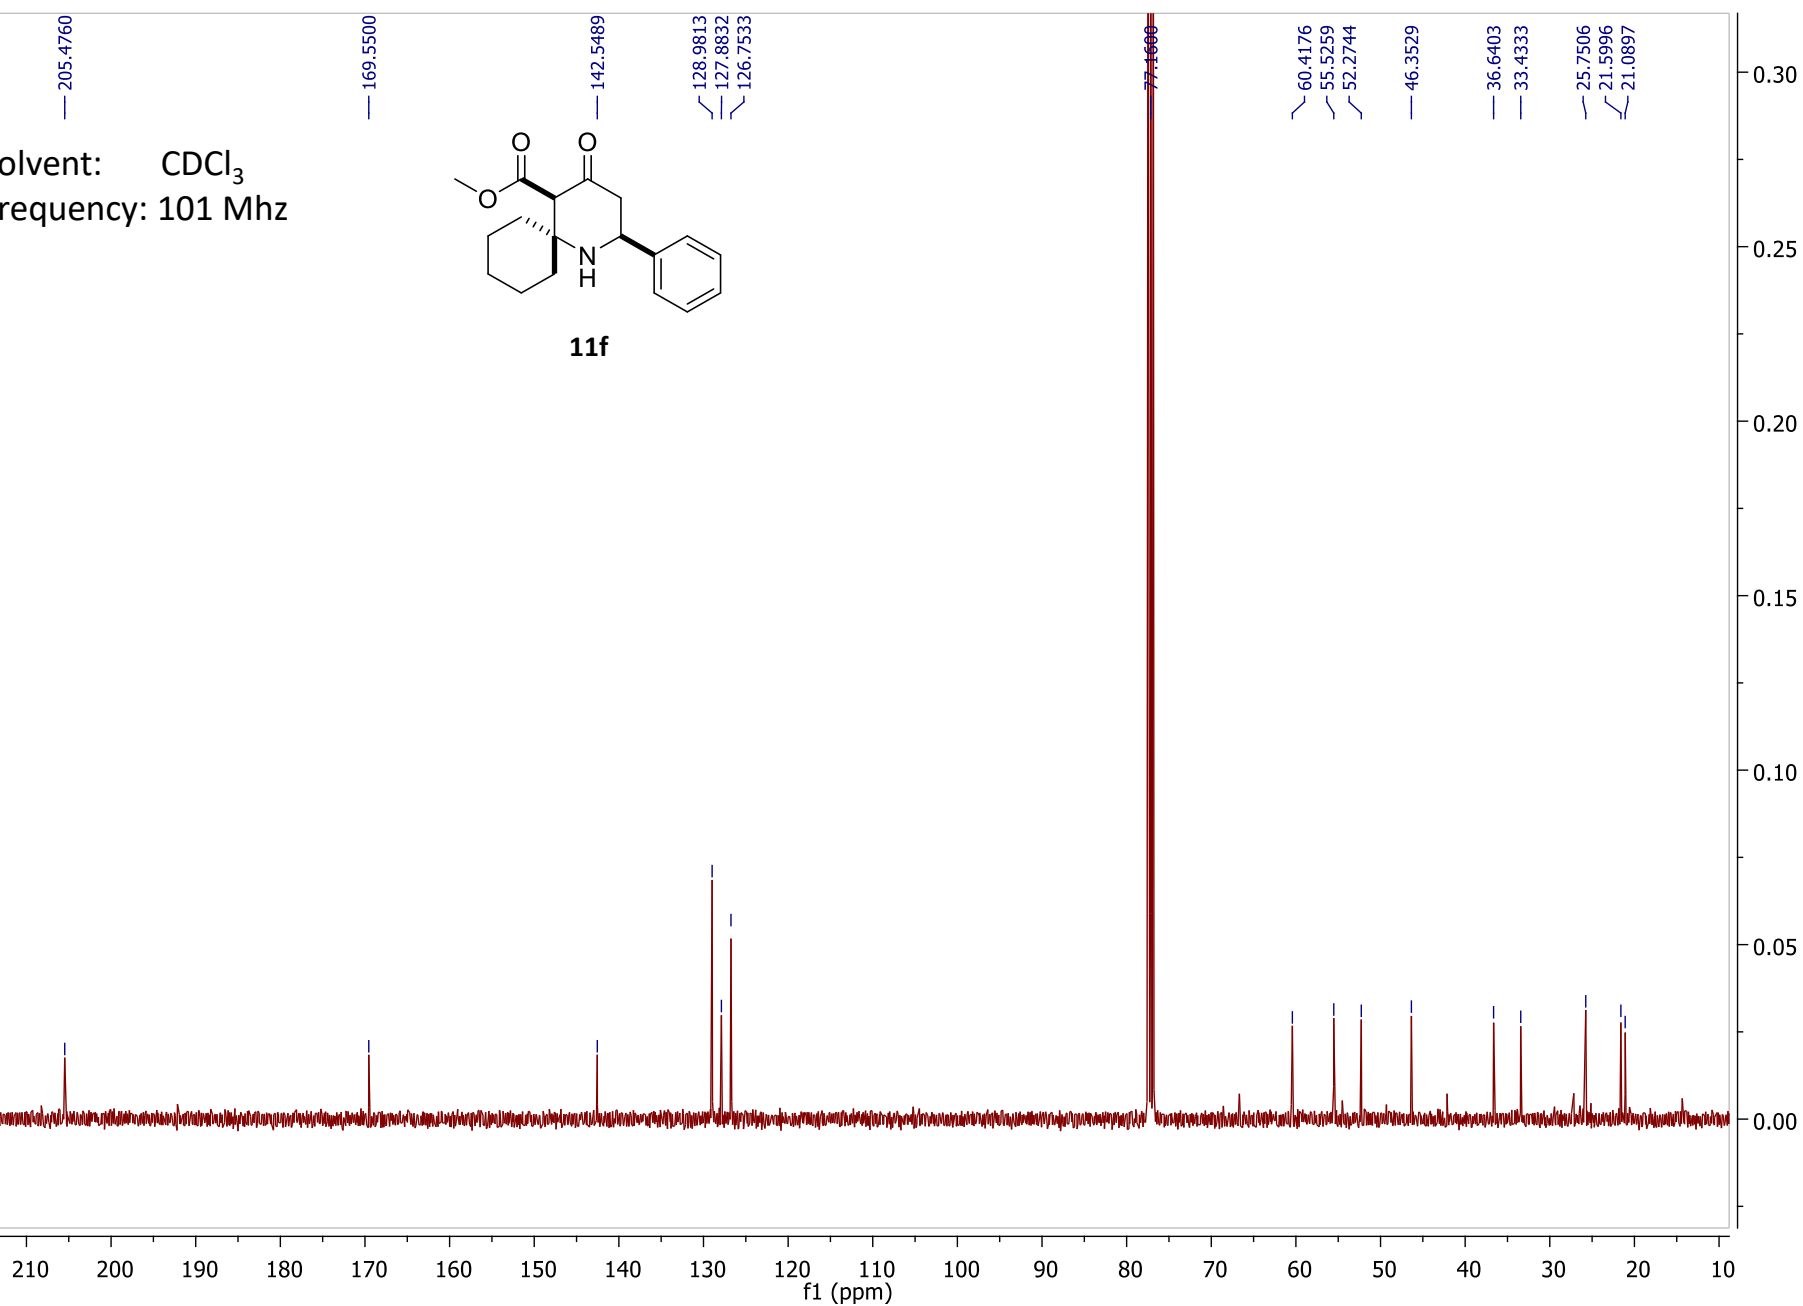



Solvent: CDCl<sub>3</sub>  
Frequency: 400 Mhz

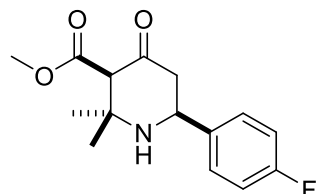

**11g**  
Mixture of  
diastereomers

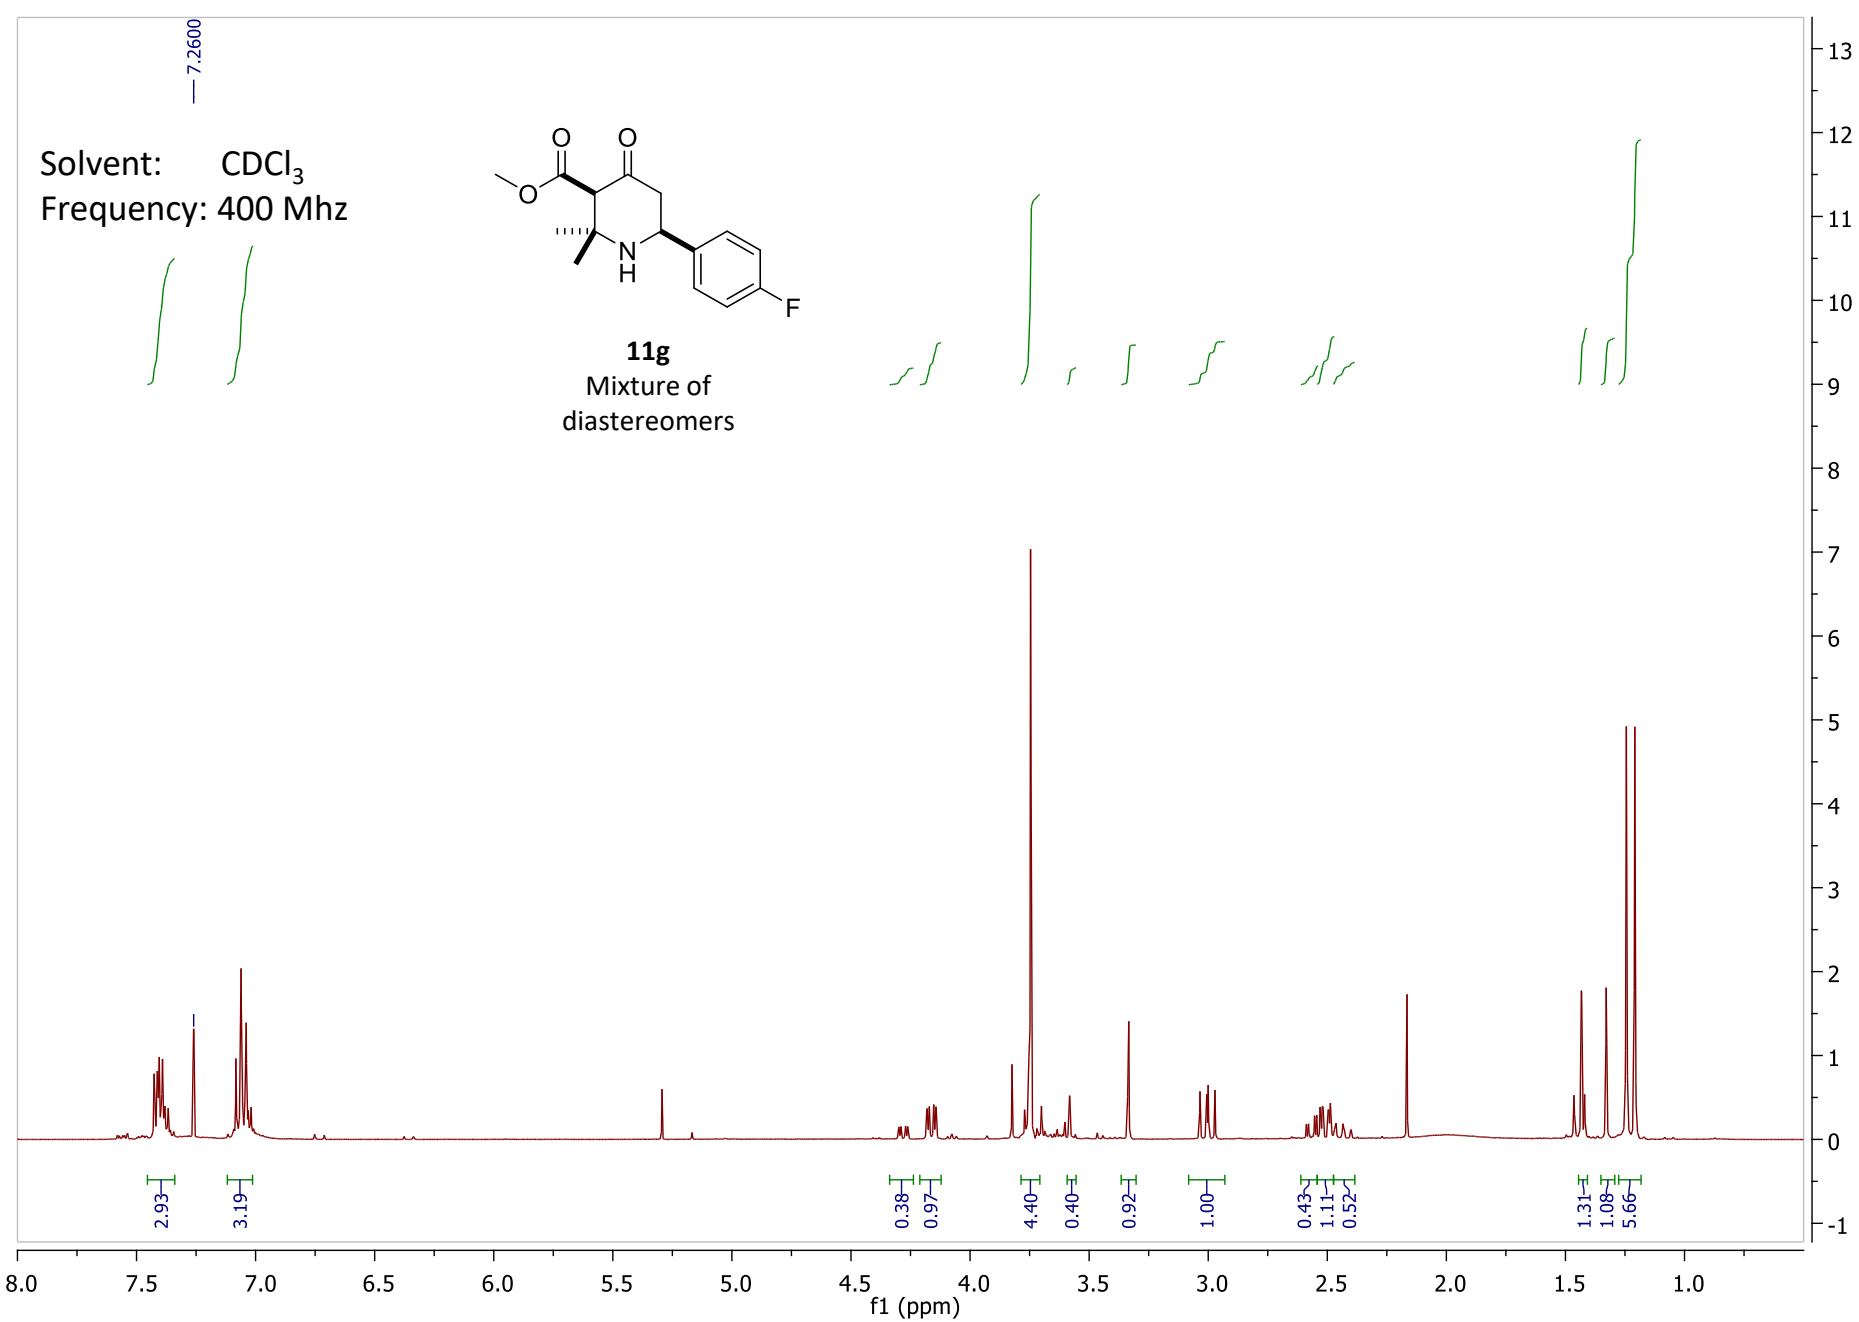

Solvent: CDCl<sub>3</sub>  
Frequency: 101 Mhz

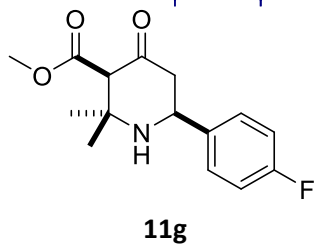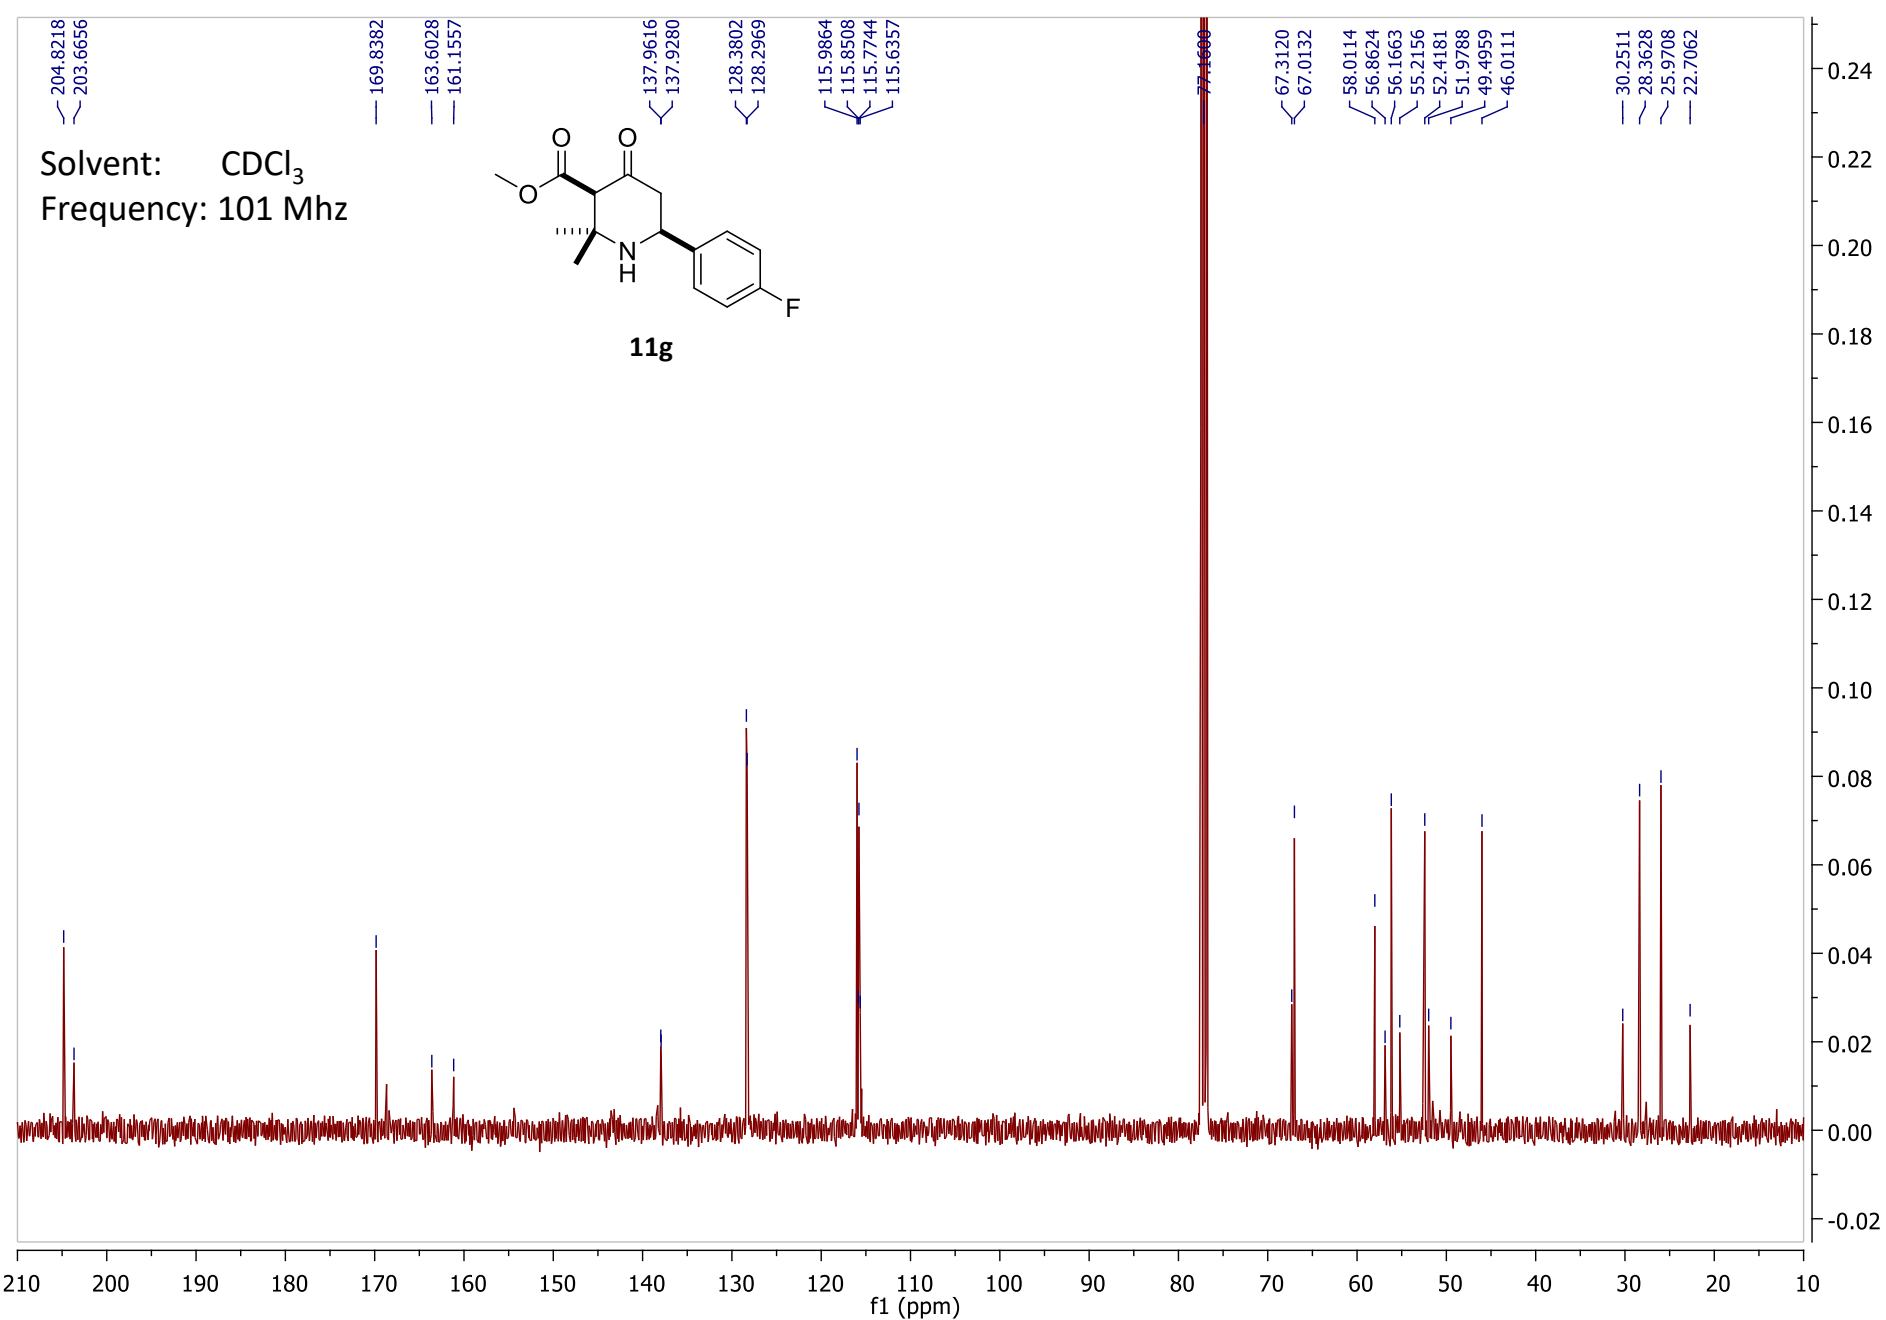

Solvent:  $\text{CDCl}_3$   
Frequency: 376 Mhz

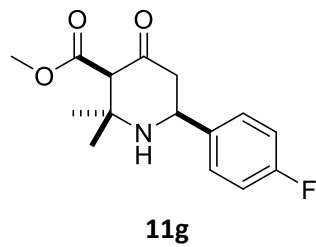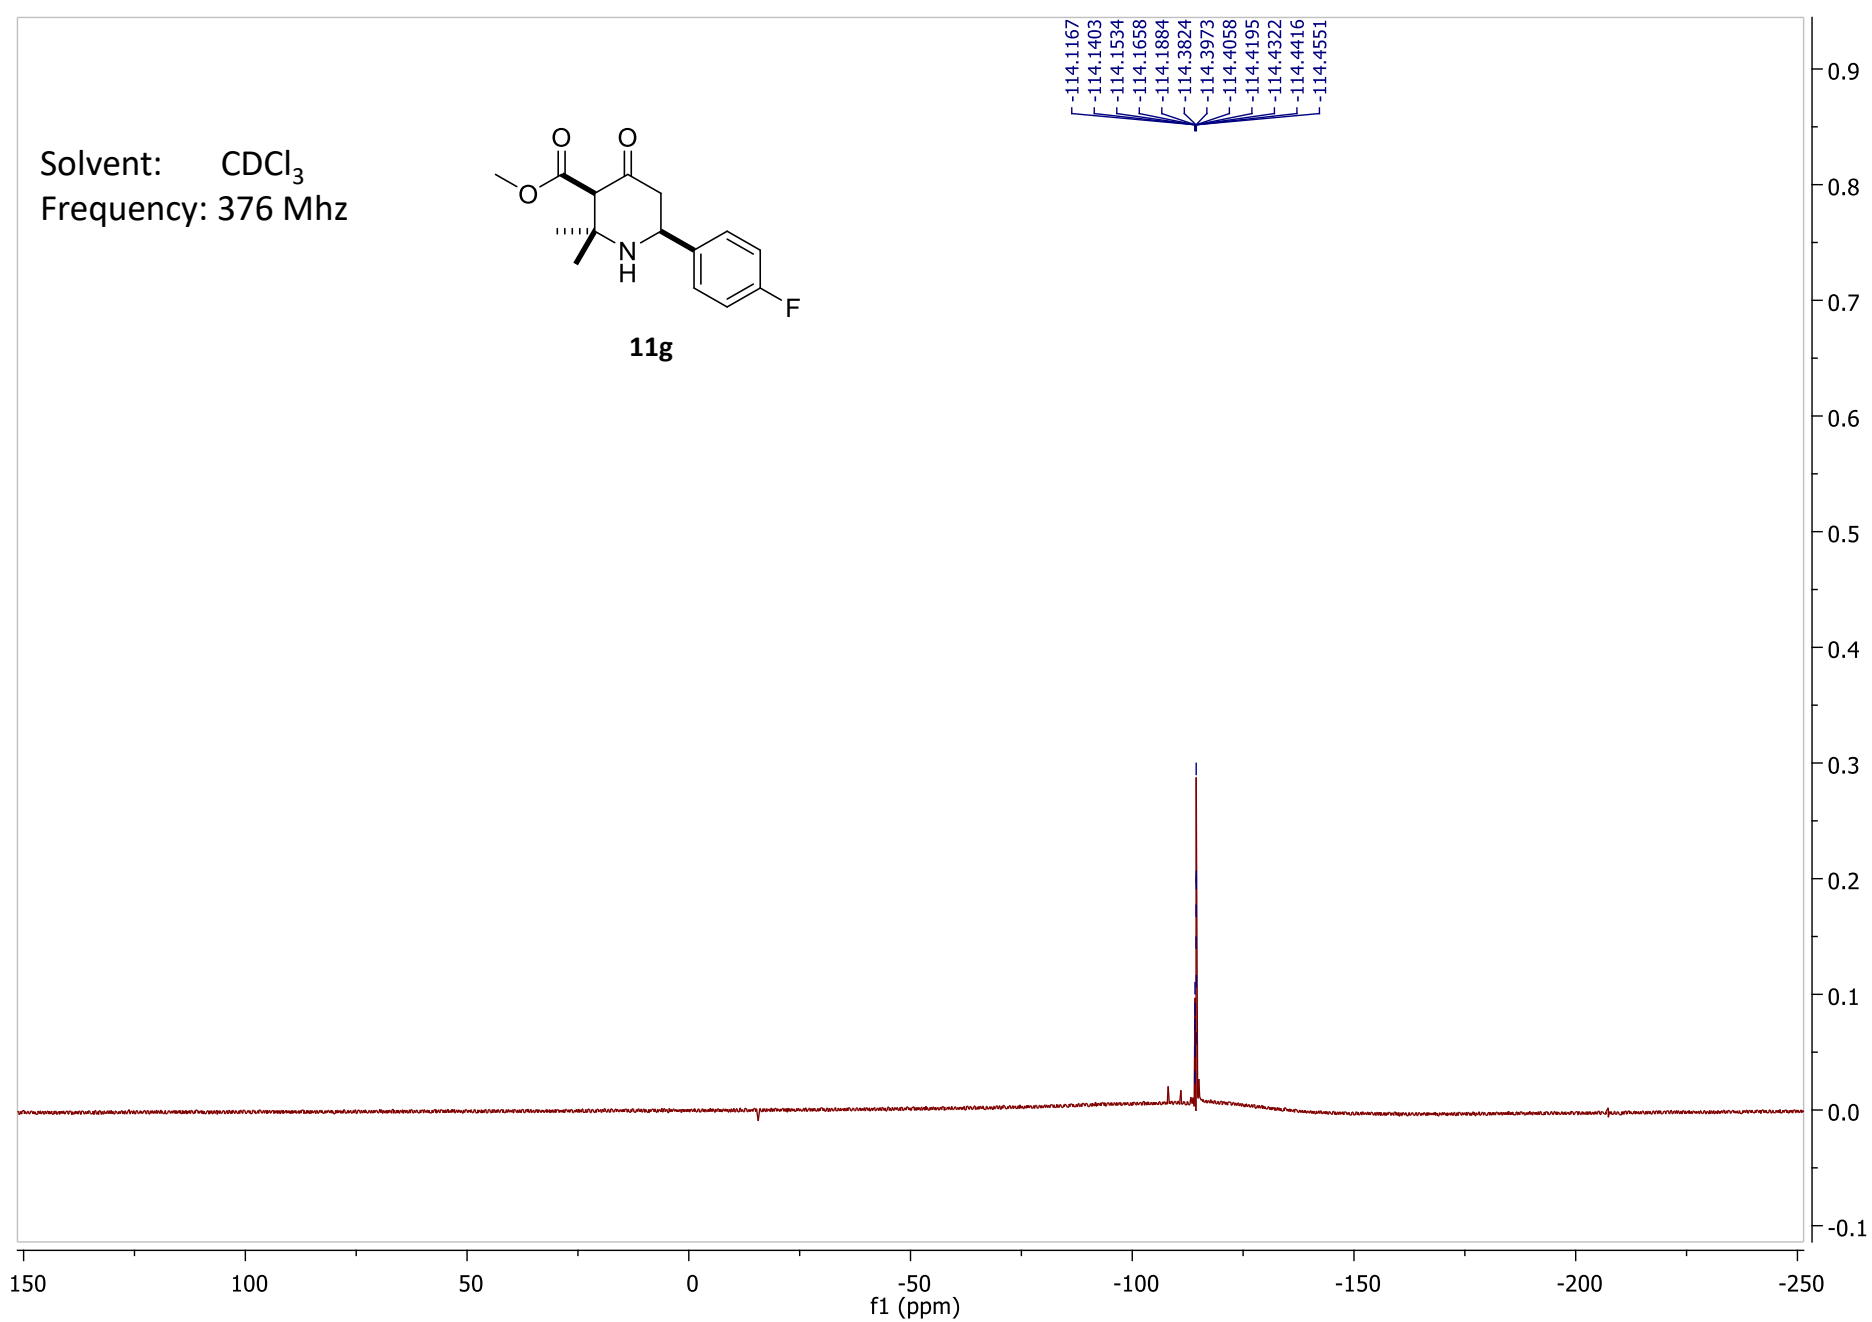

Solvent: CDCl<sub>3</sub>  
Frequency: 400 Mhz

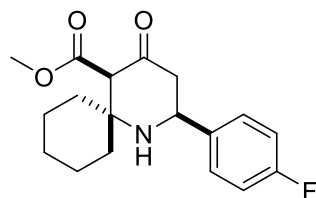

**11h**  
Two-step  
Mixture of  
diastereomers

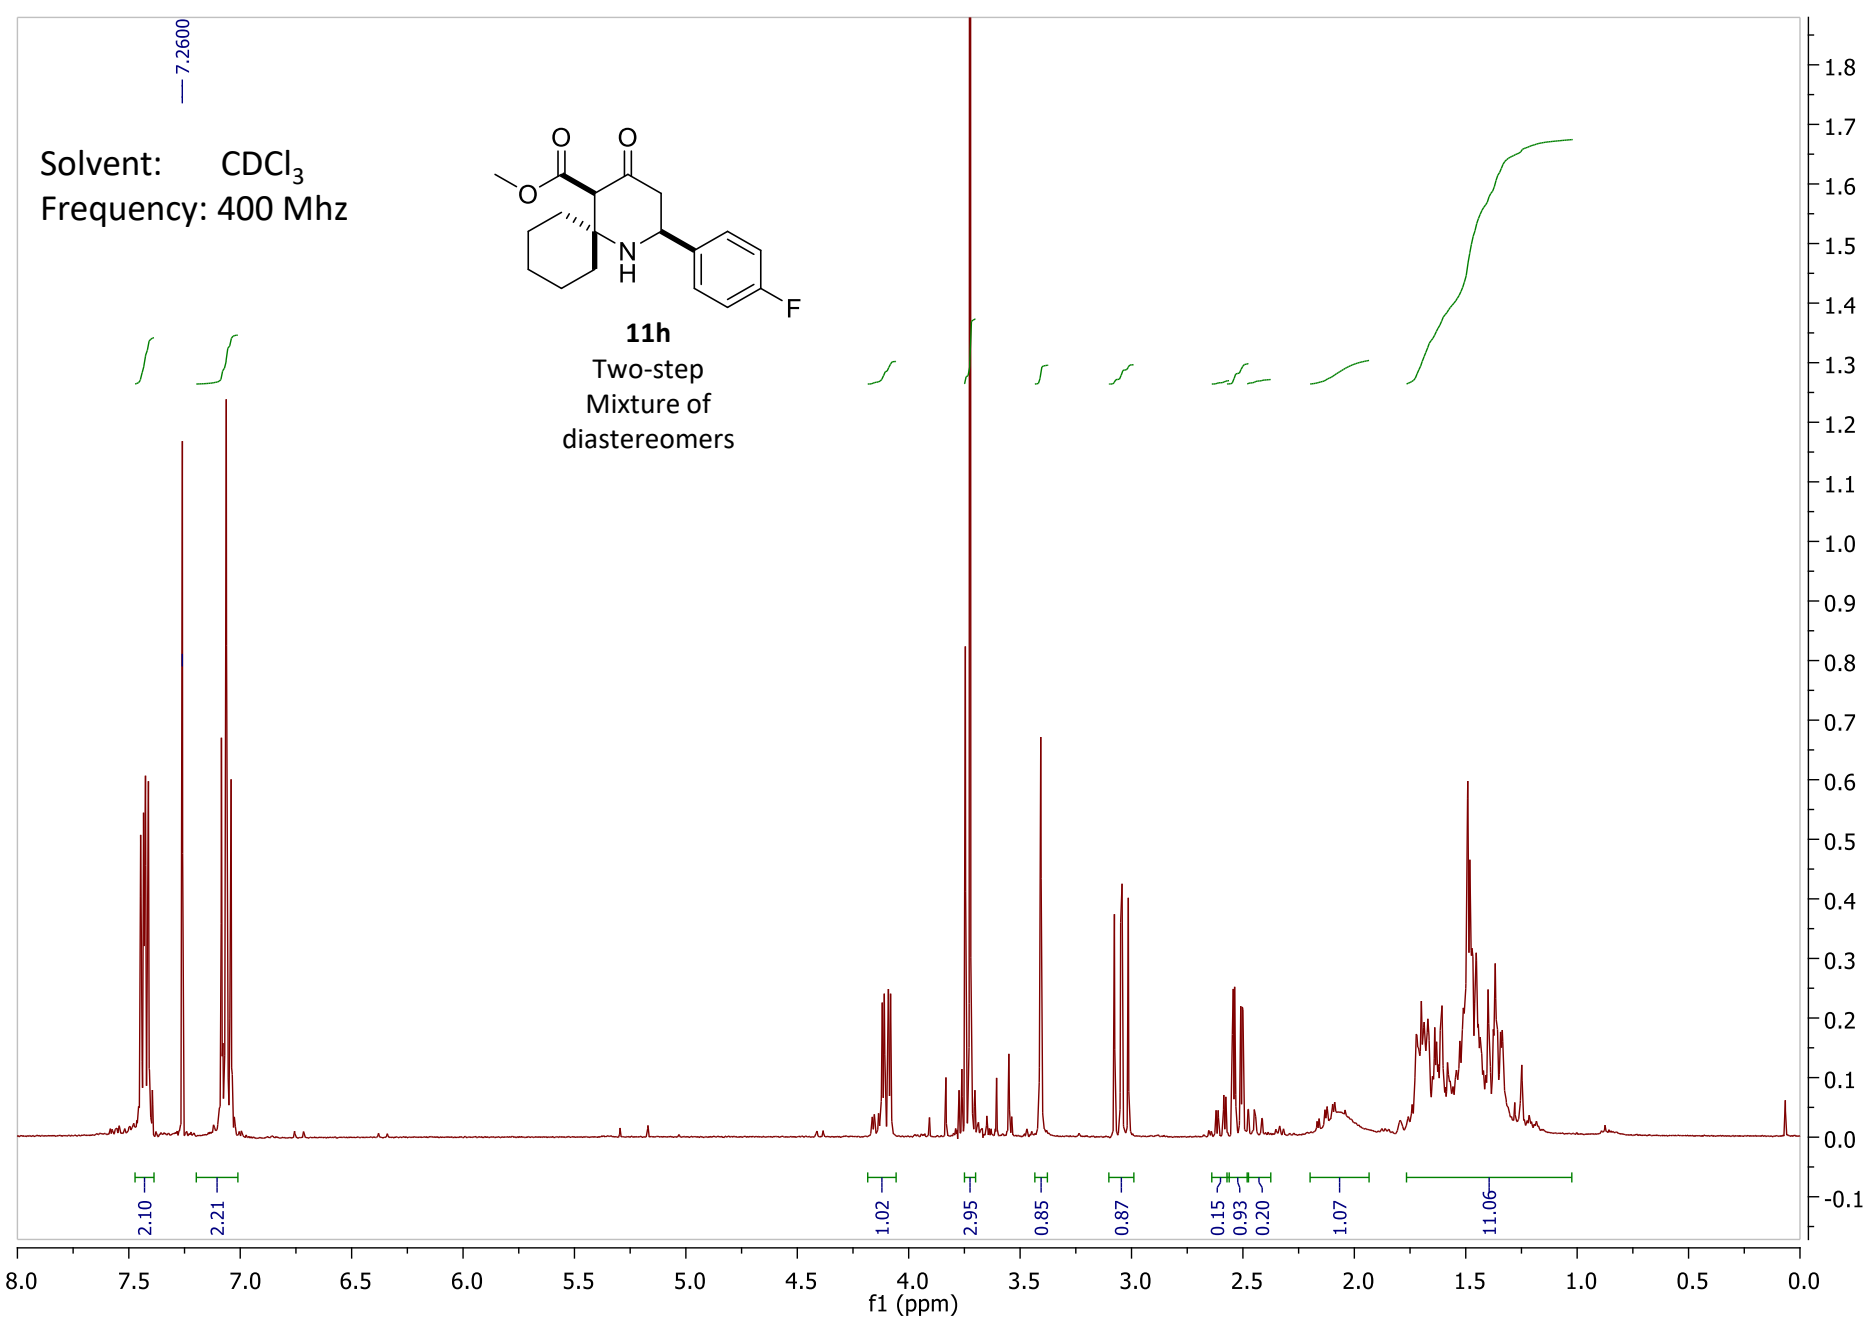

Solvent:  $\text{CDCl}_3$   
Frequency: 400 Mhz

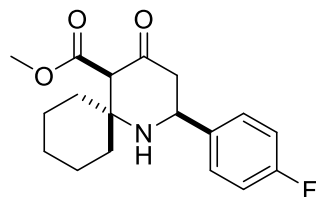

**11h**  
One-pot  
Mixture of  
diastereomers

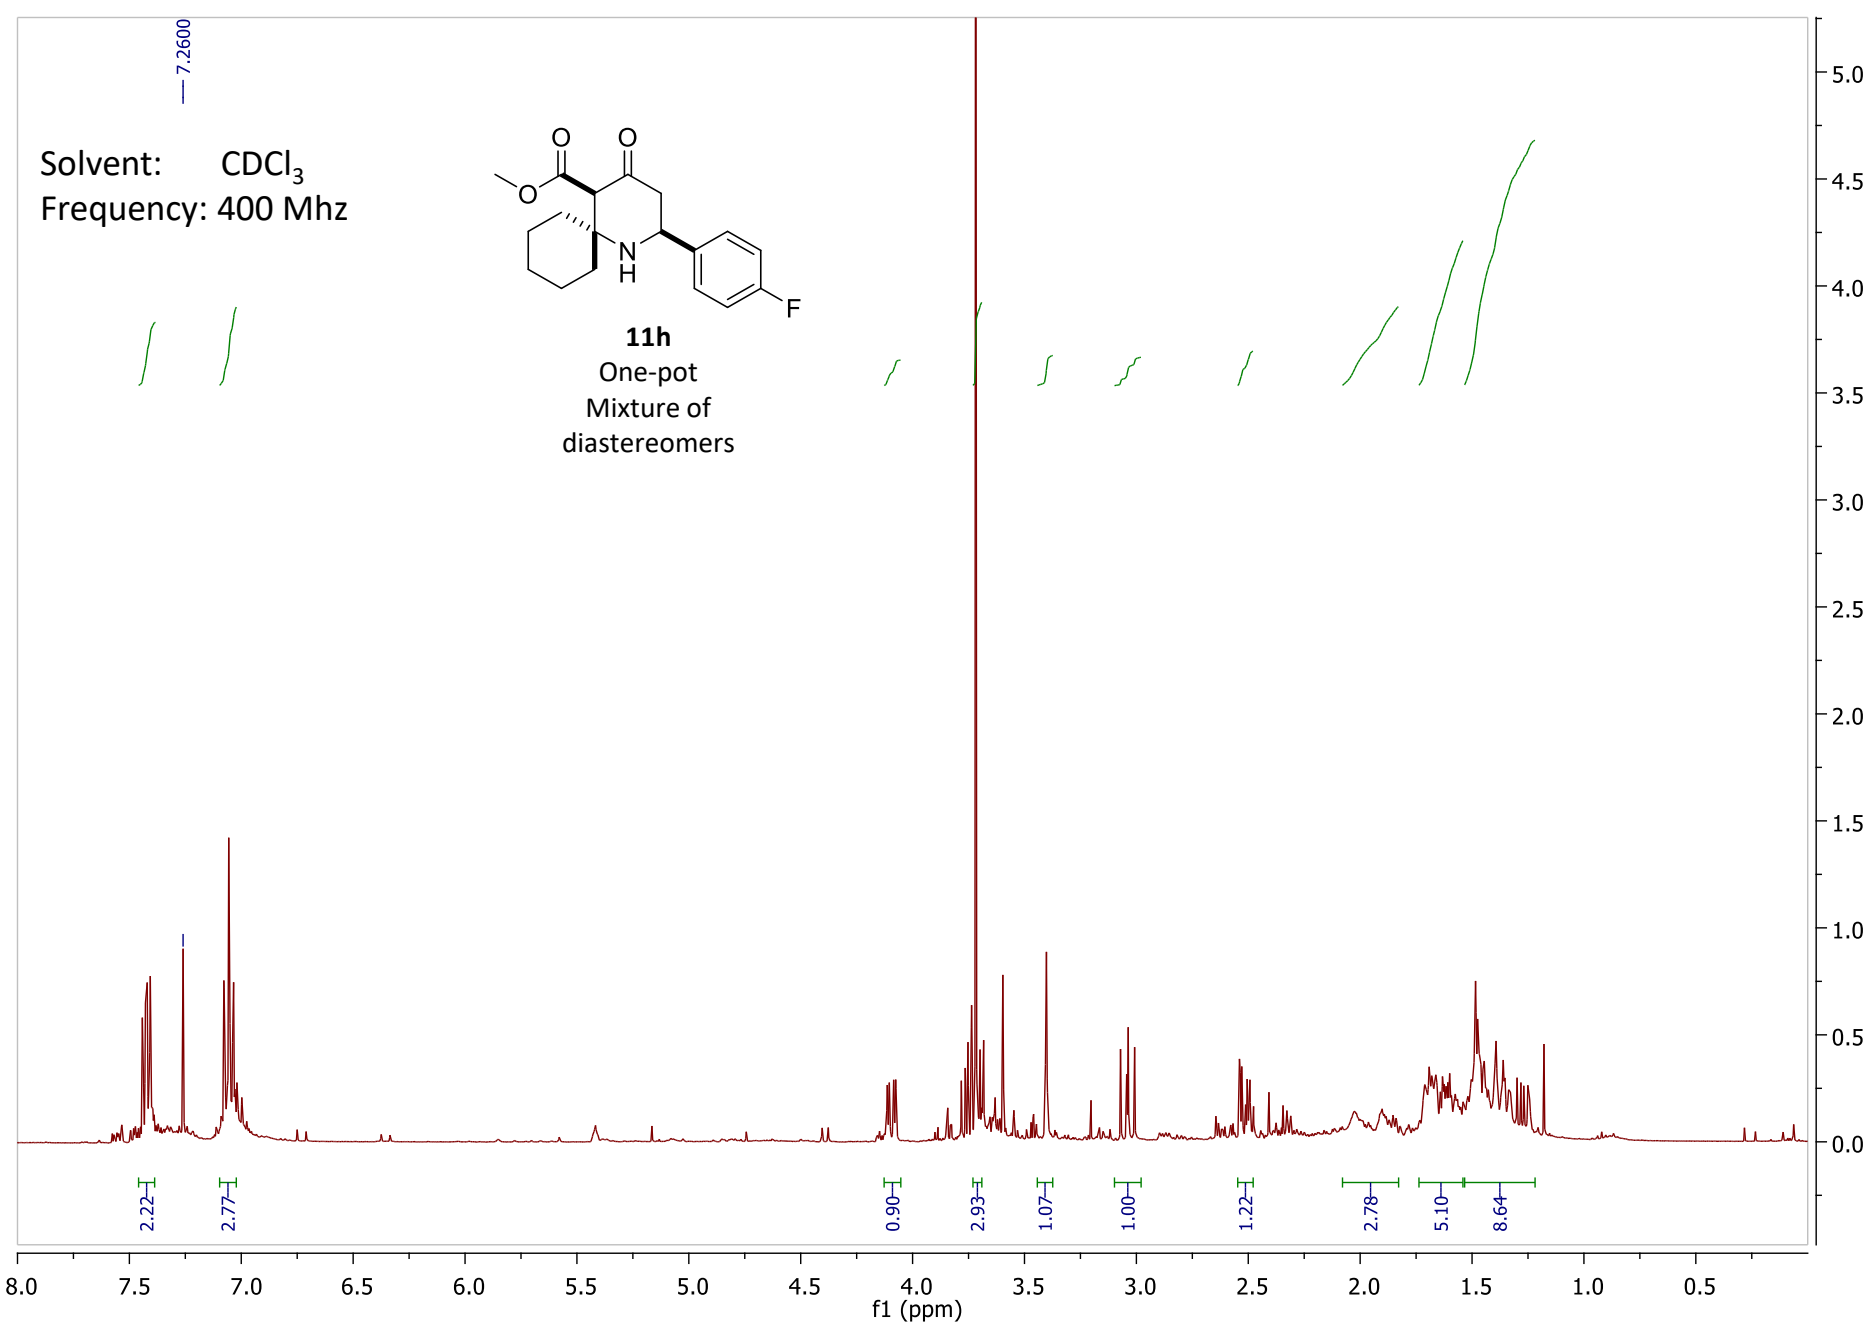

Solvent:  $\text{CDCl}_3$   
Frequency: 101 Mhz

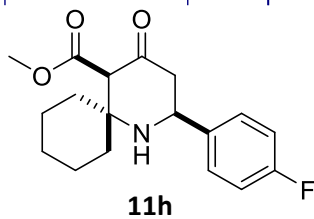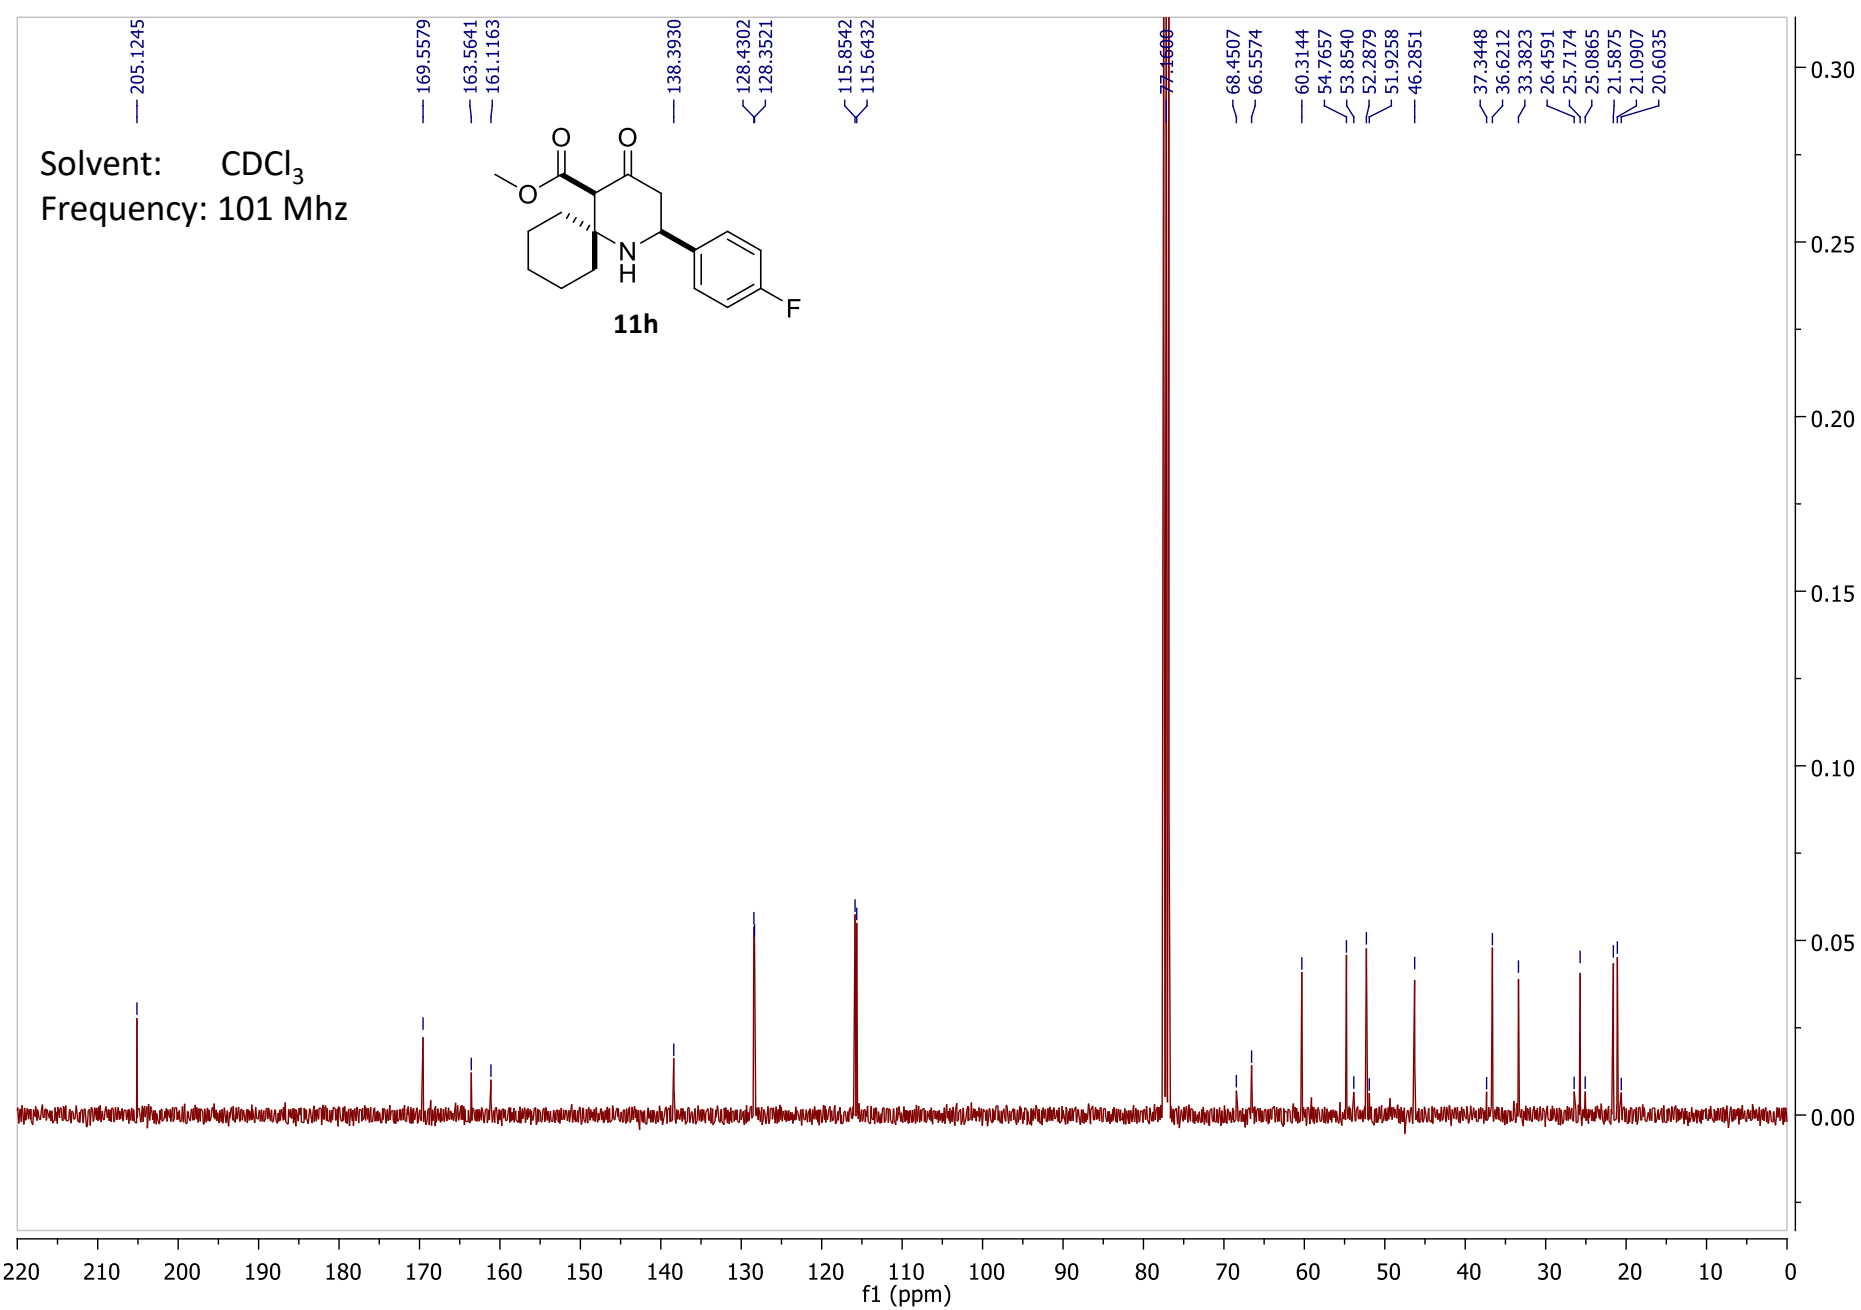

Solvent:  $\text{CDCl}_3$   
Frequency: 376 Mhz

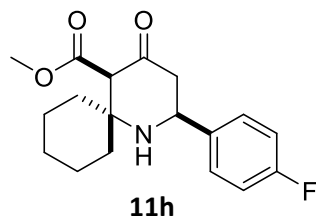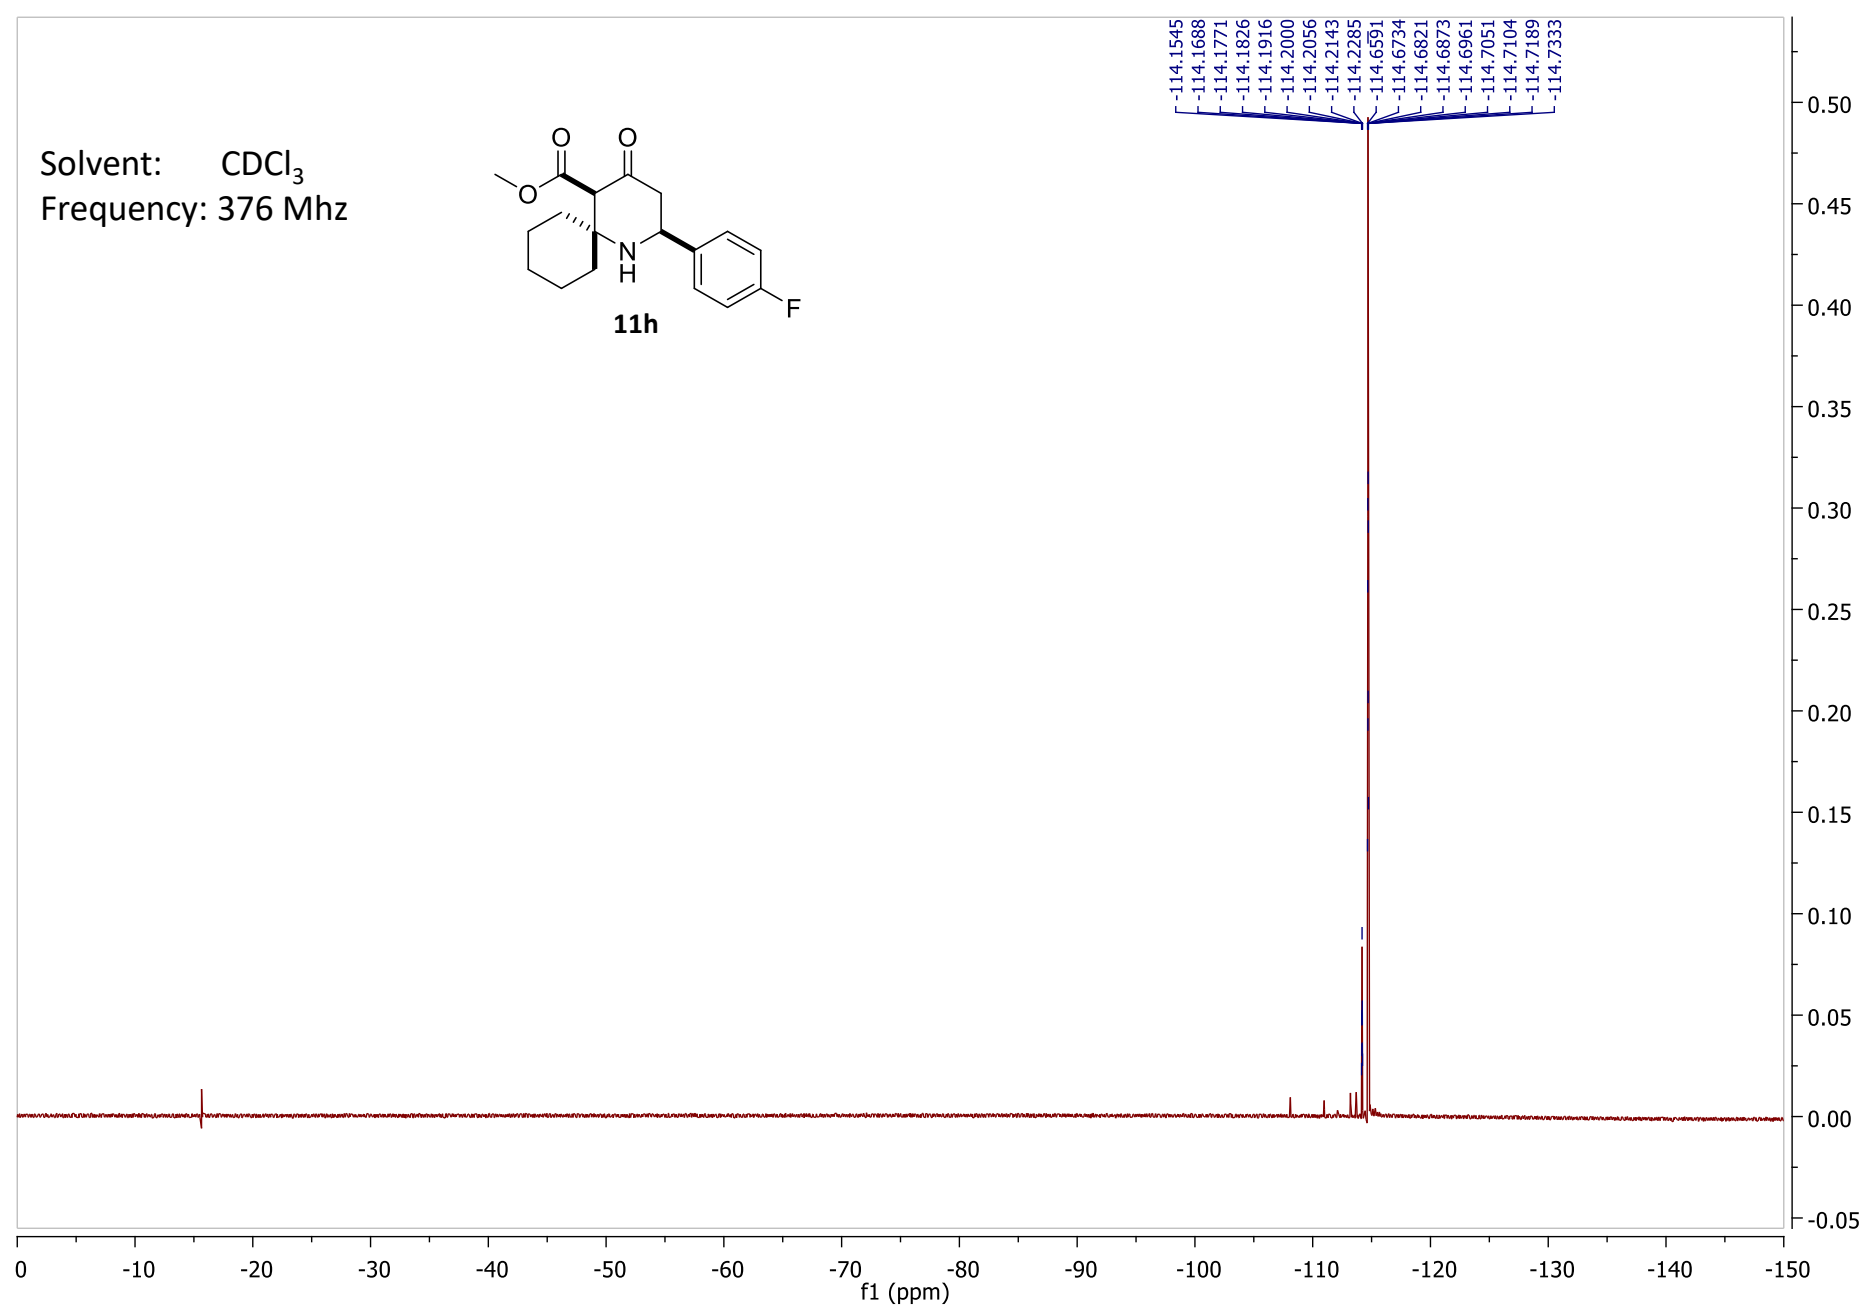

Solvent:  $\text{CDCl}_3$   
Frequency: 400 Mhz

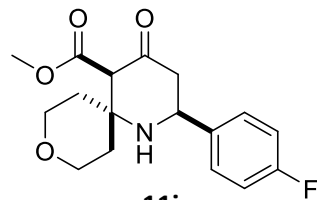

**11i**  
Two-step

— 7.2600

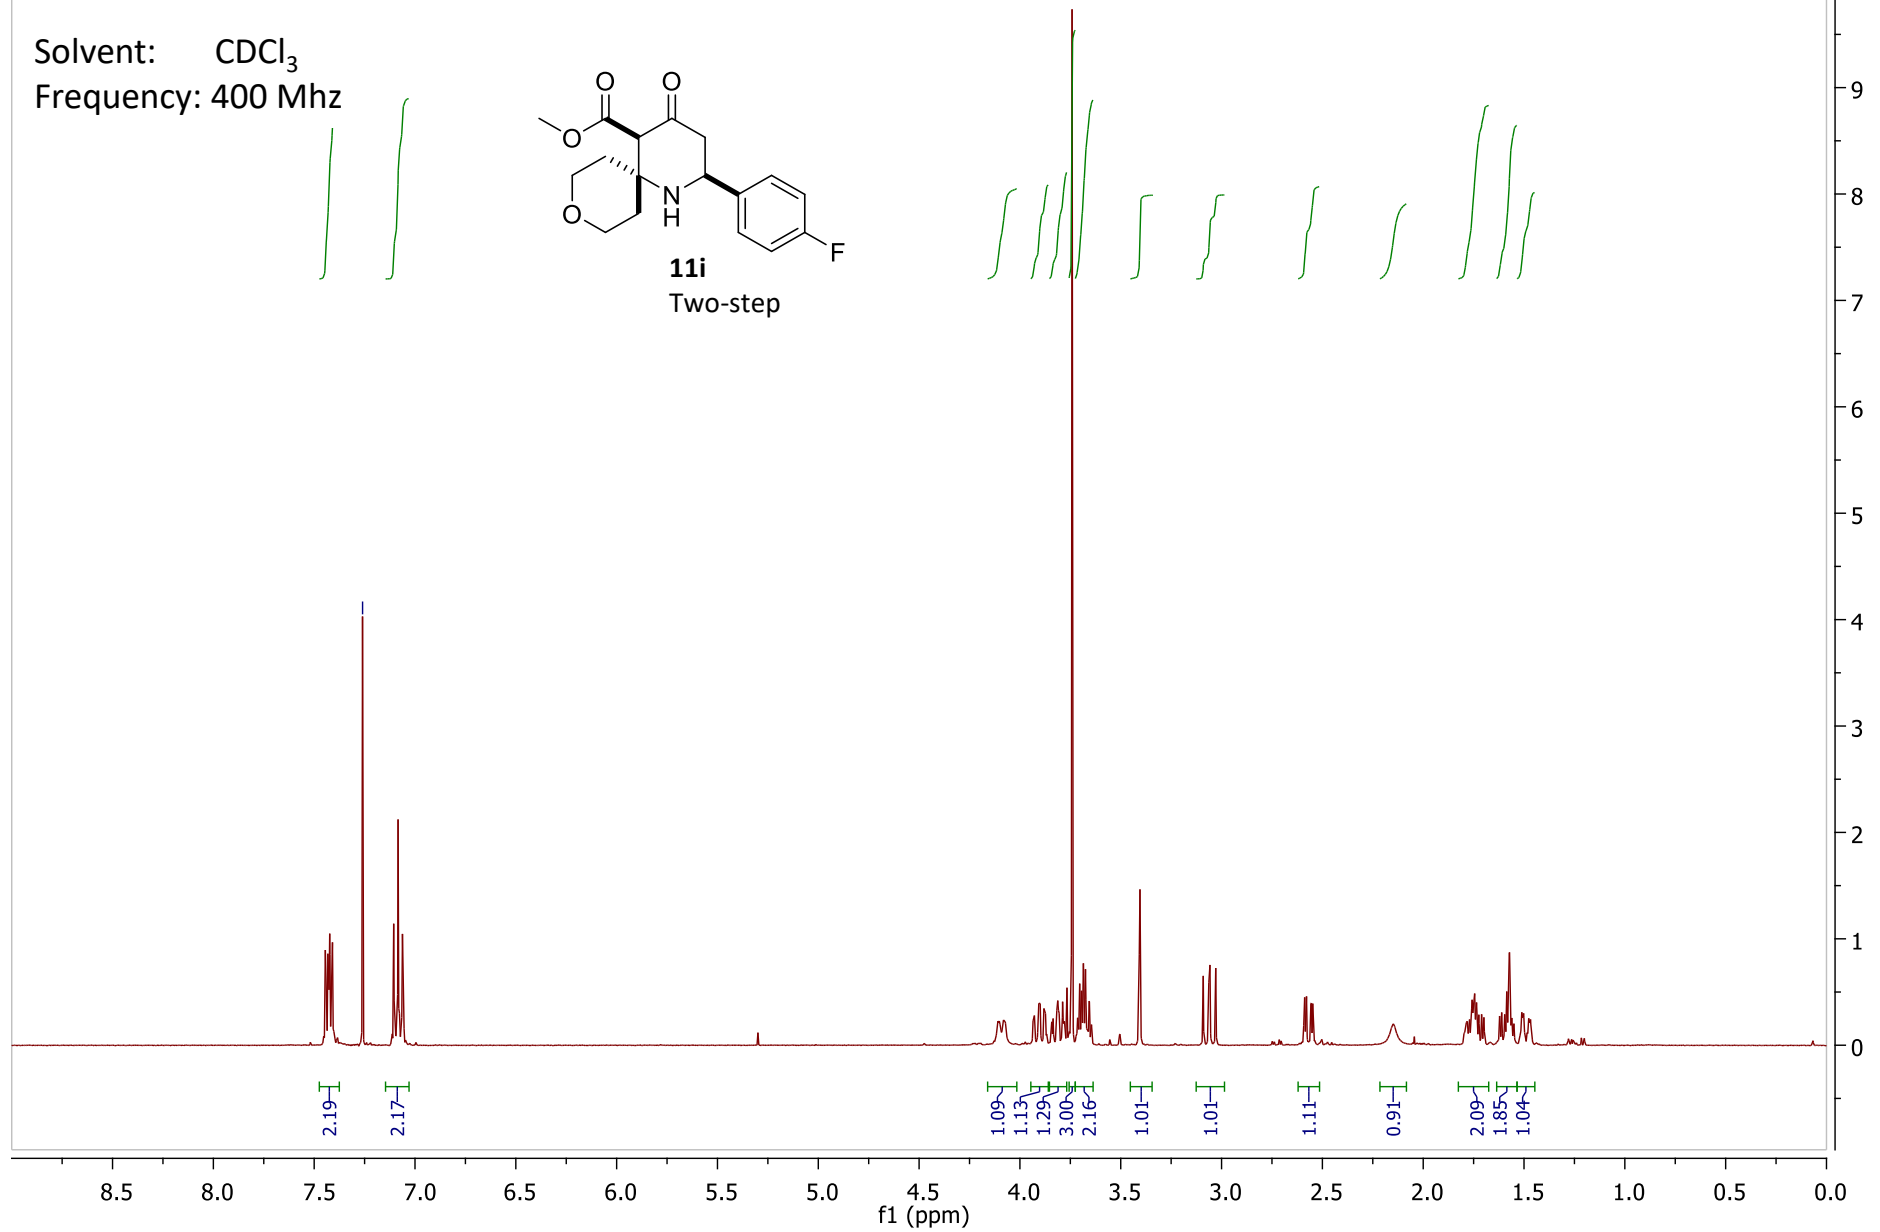



Solvent:  $\text{CDCl}_3$   
Frequency: 400 Mhz

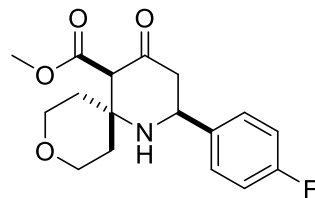

**11i**  
One-pot  
Mixture of  
diastereomers

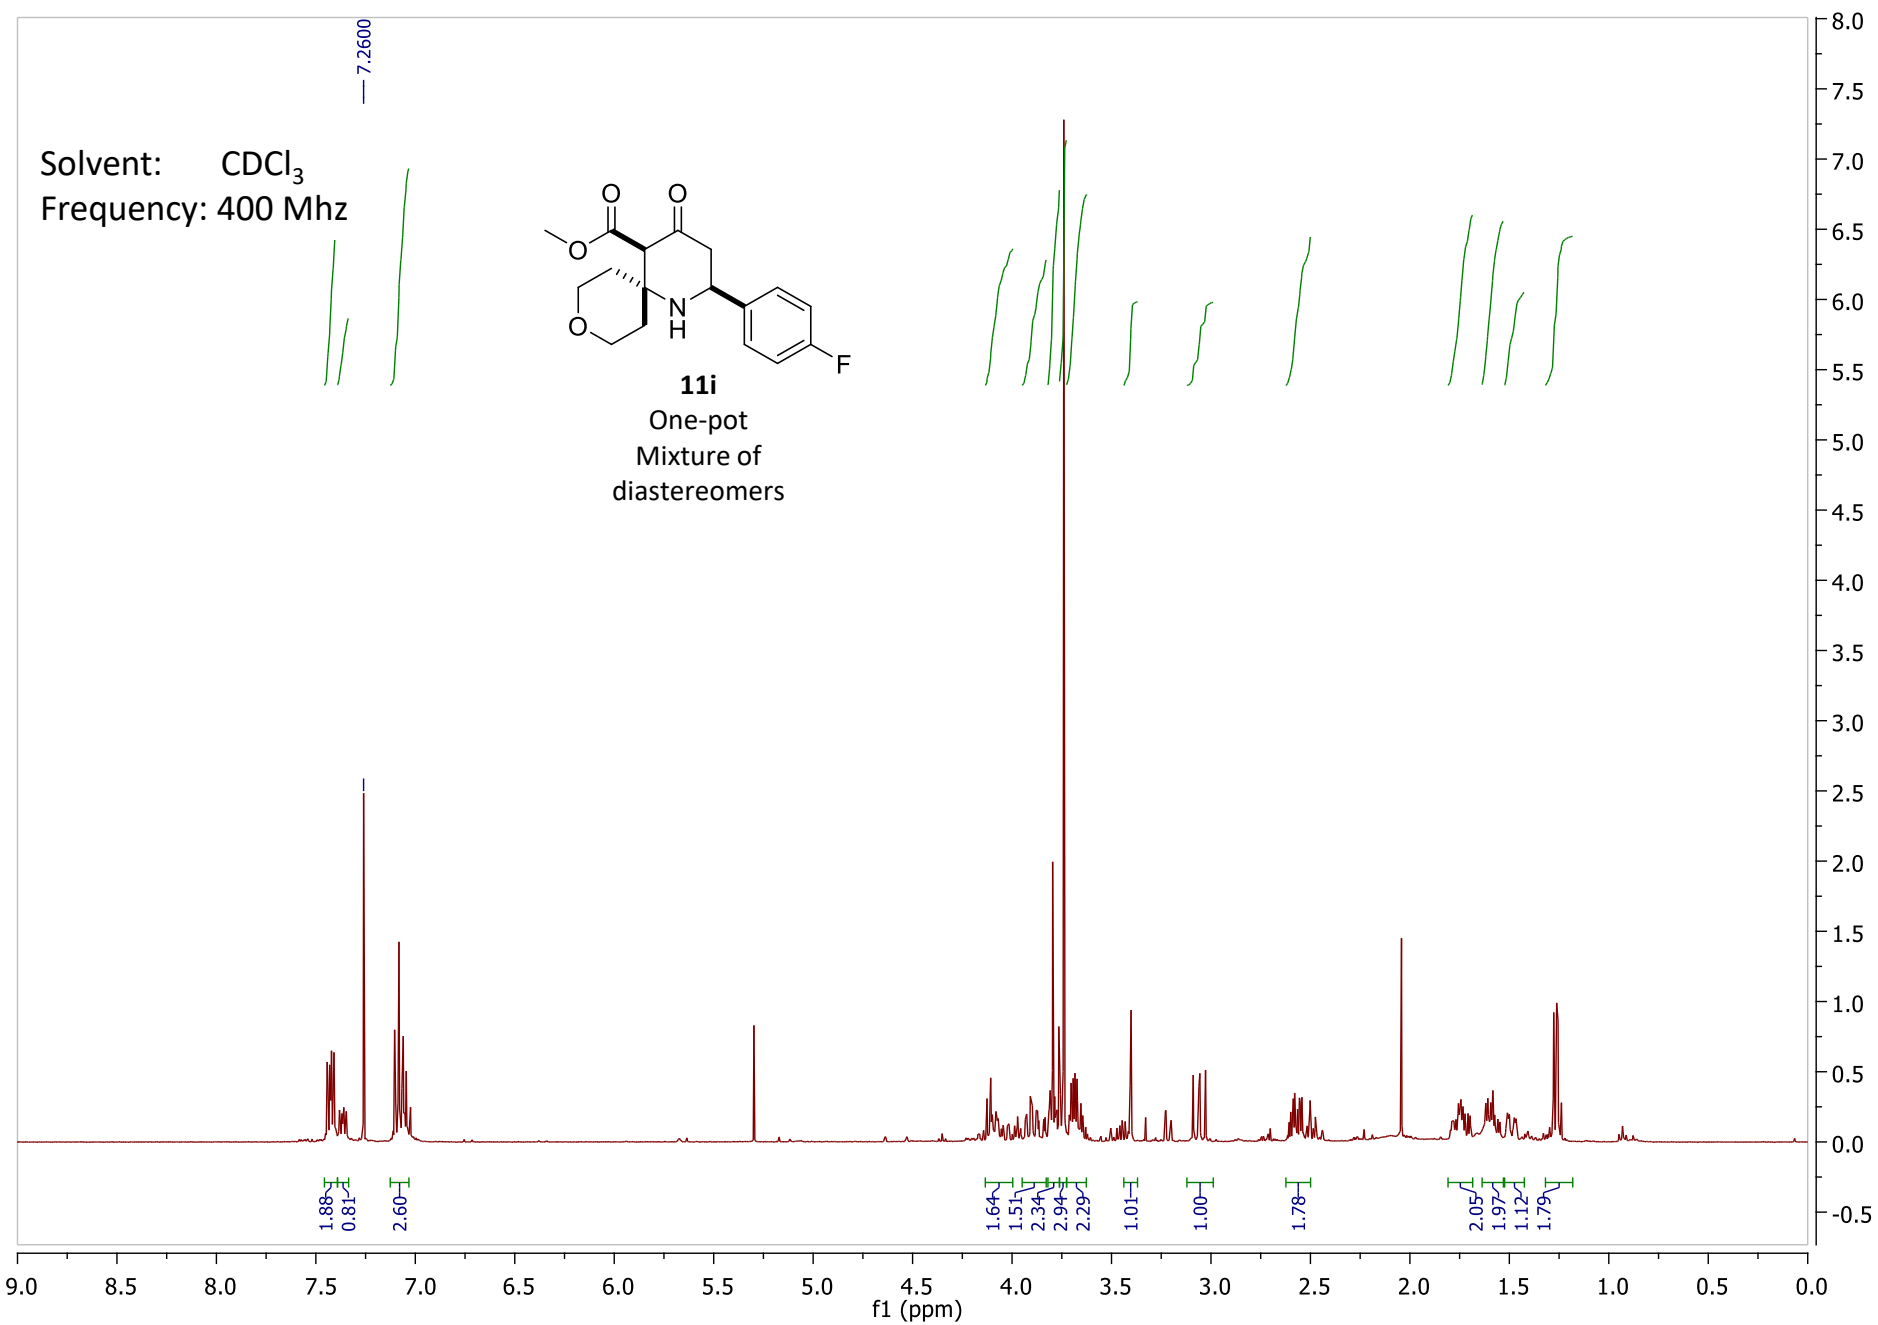

Solvent: CDCl<sub>3</sub>  
Frequency: 101 Mhz

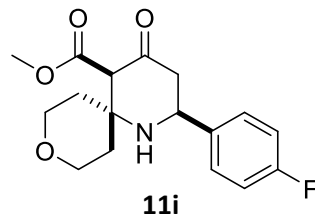

11i

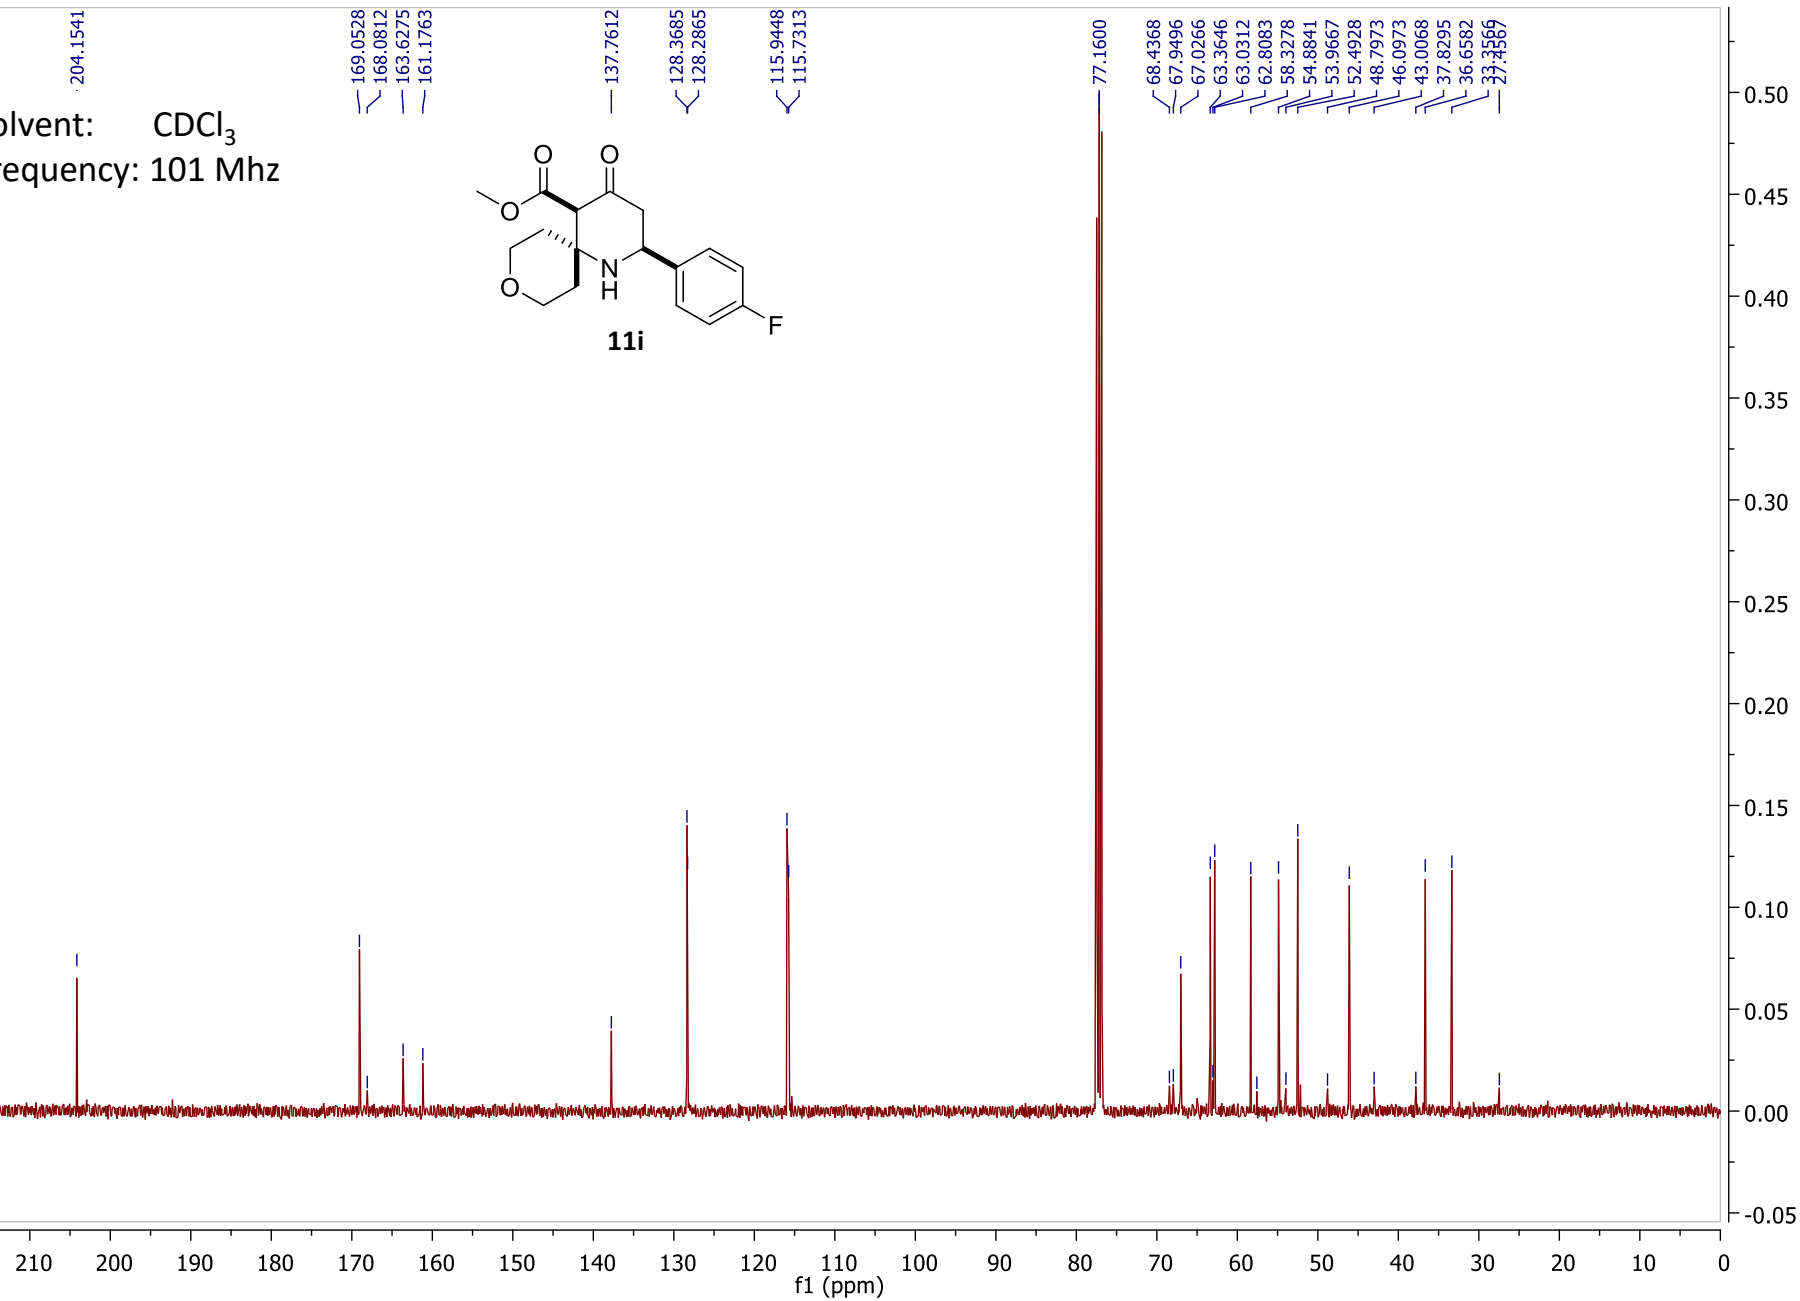

Solvent: CDCl<sub>3</sub>  
Frequency: 376 Mhz

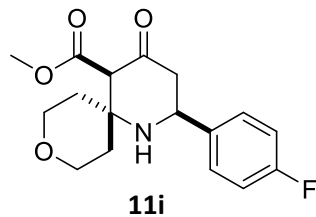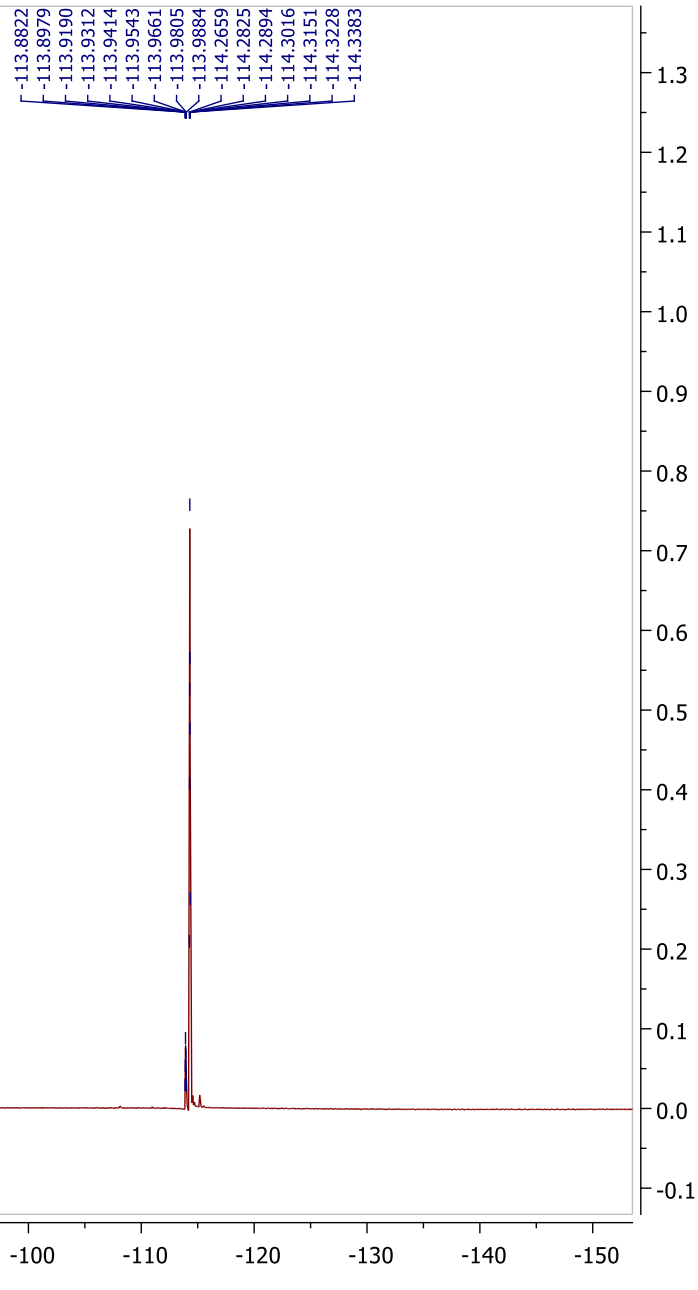

Solvent: CDCl<sub>3</sub>  
Frequency: 400 Mhz

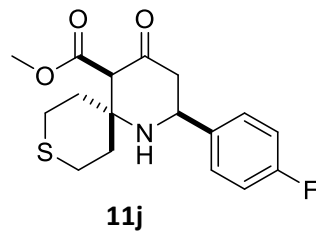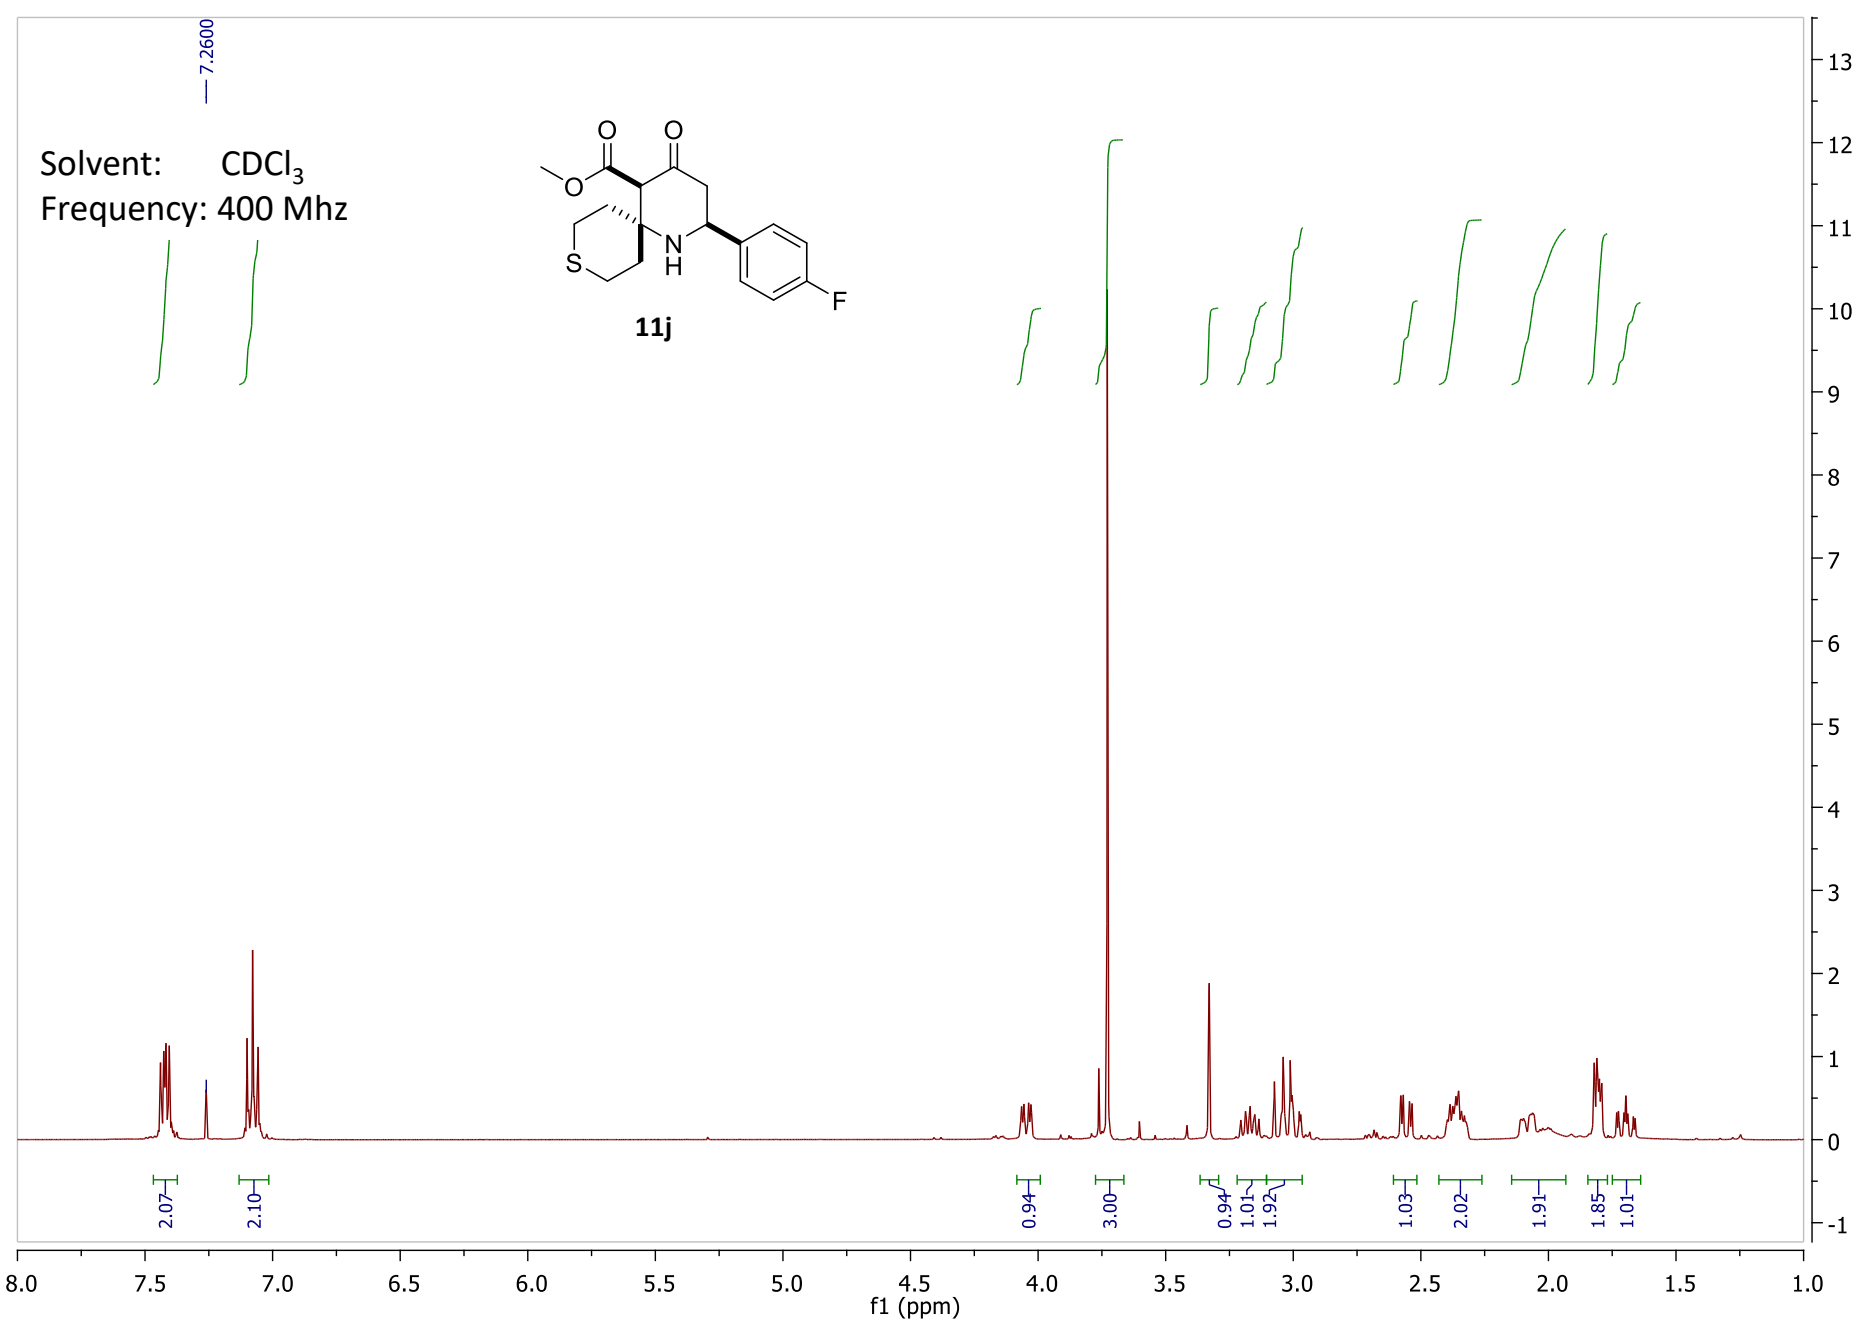

Solvent:  $\text{CDCl}_3$   
Frequency: 101 Mhz

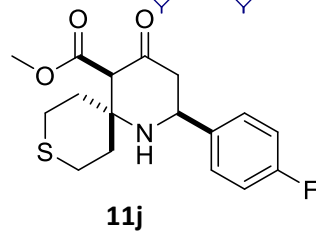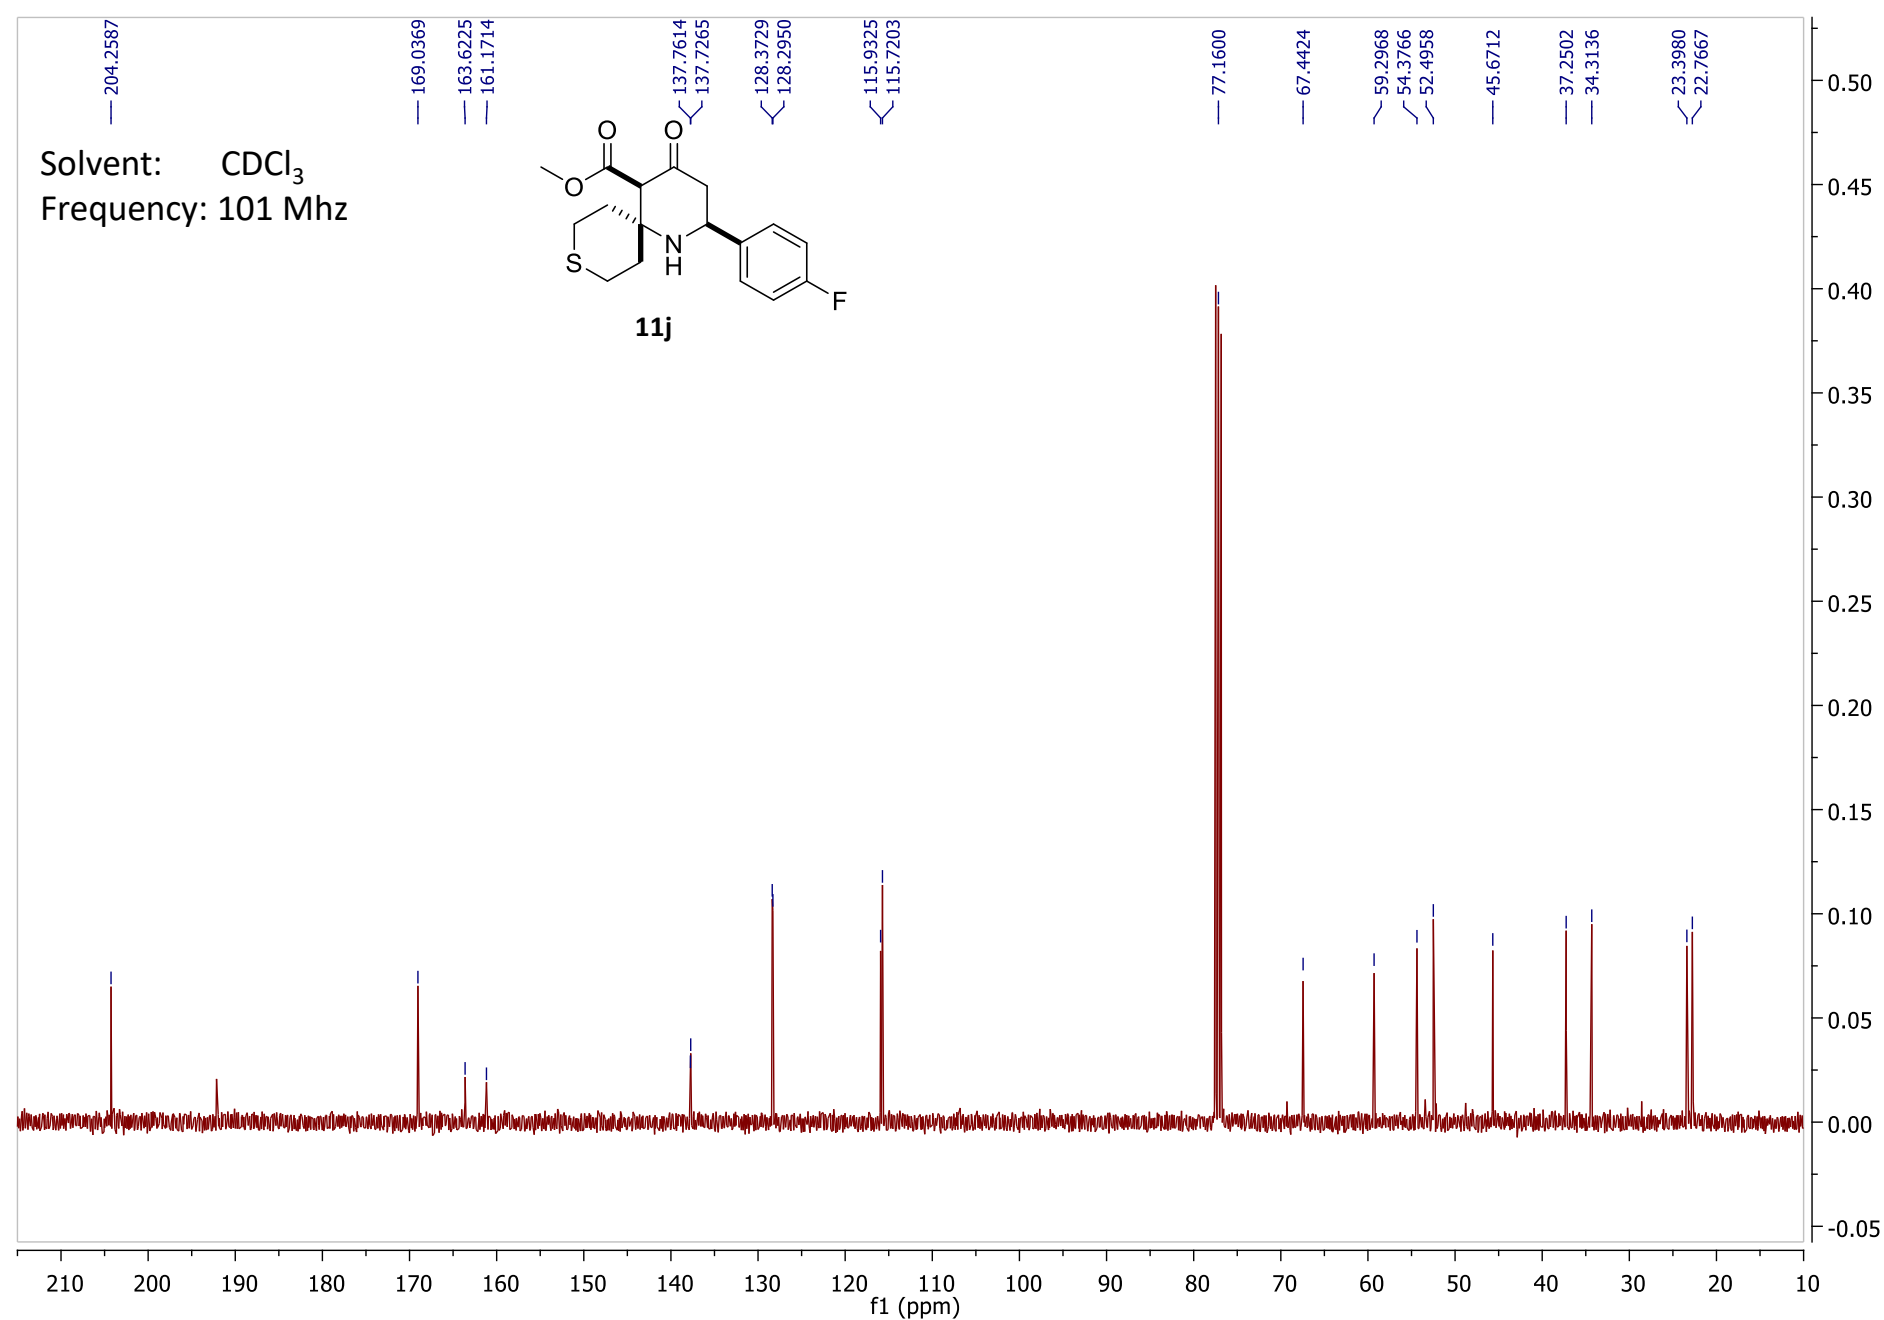

Solvent:  $\text{CDCl}_3$   
Frequency: 376 Mhz

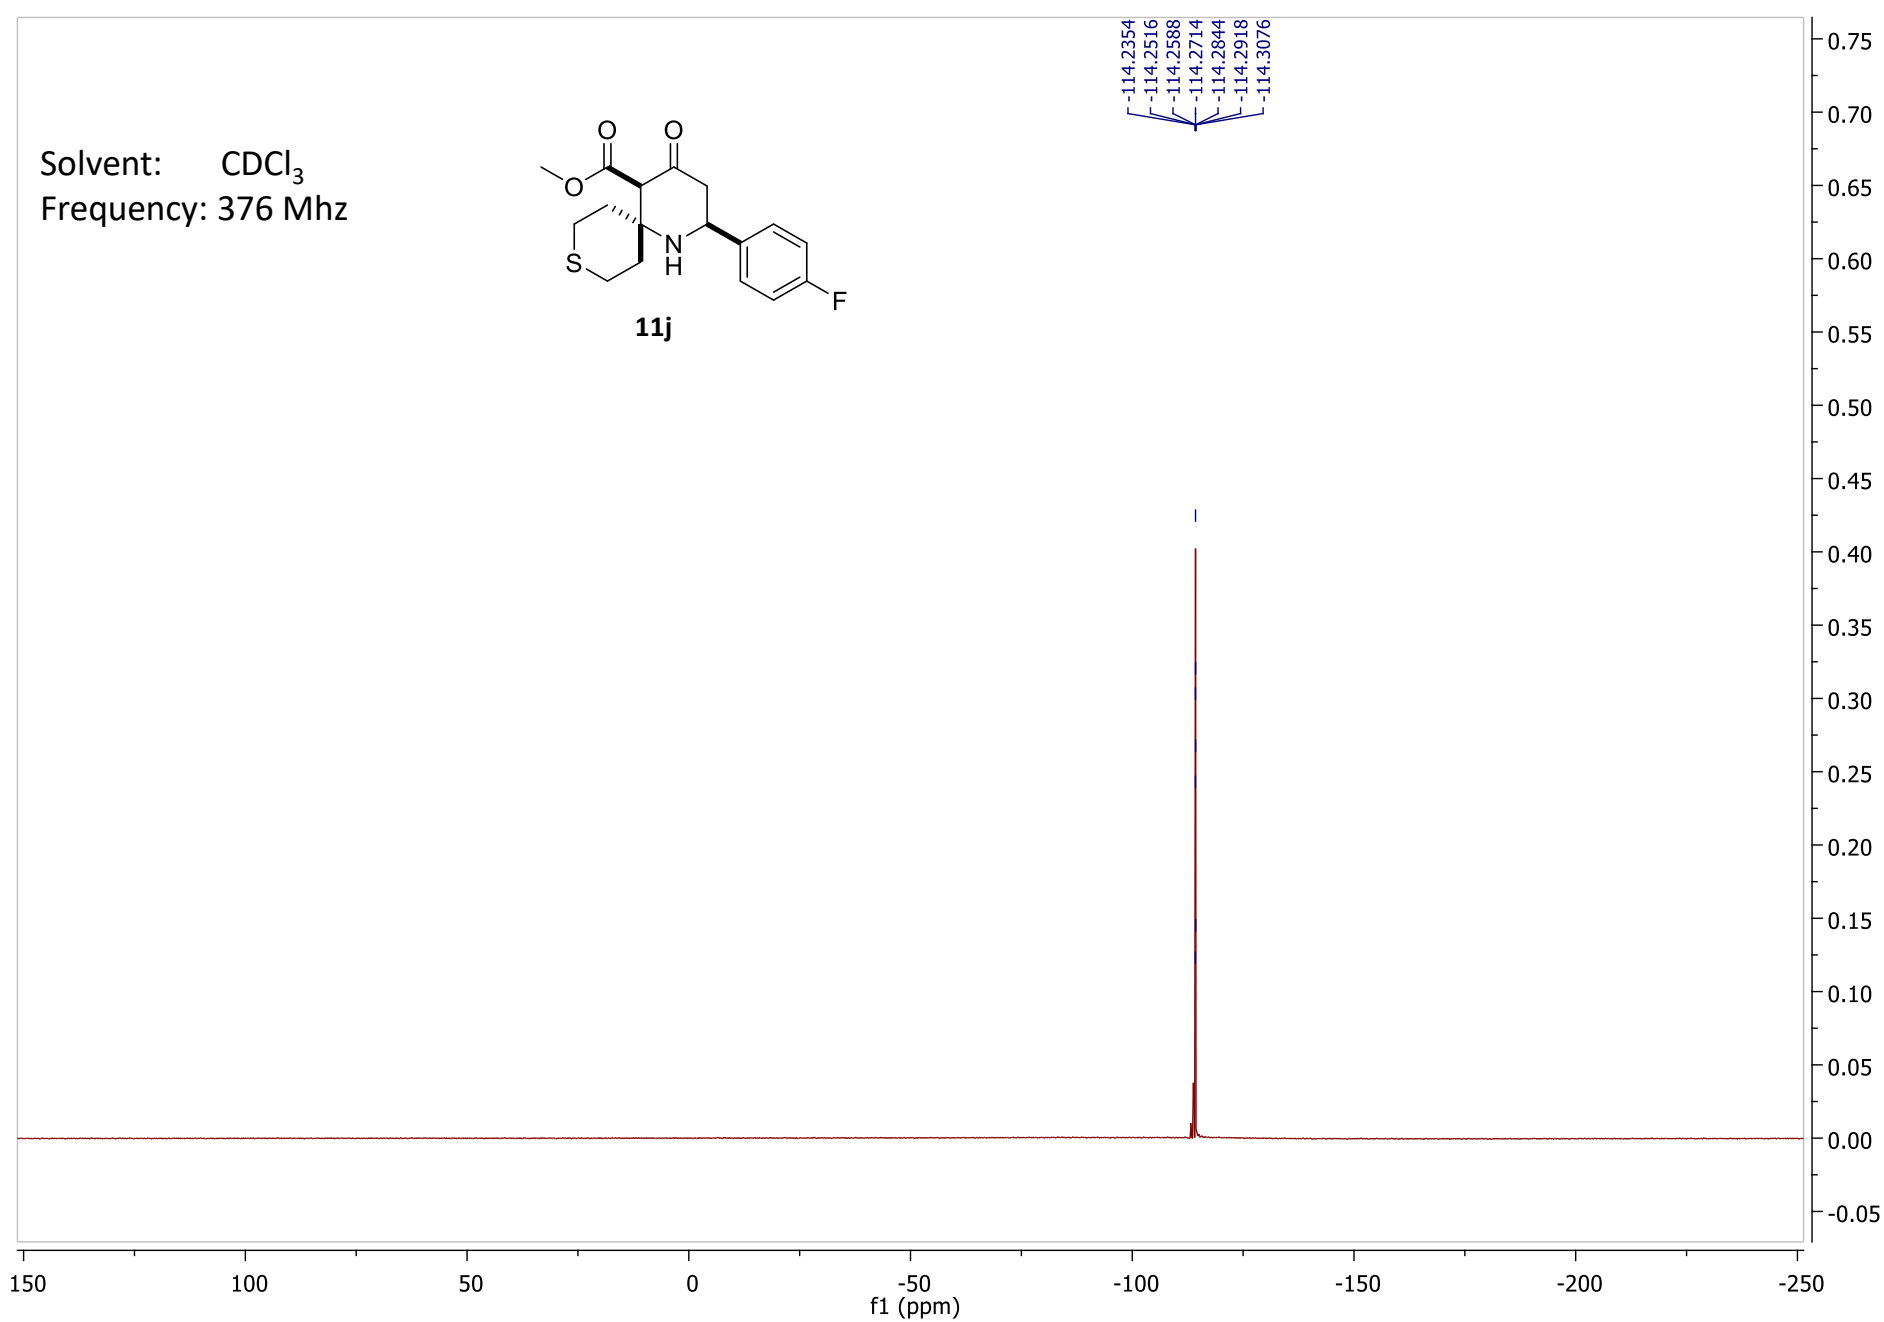

Solvent:  $\text{CDCl}_3$   
Frequency: 400 Mhz

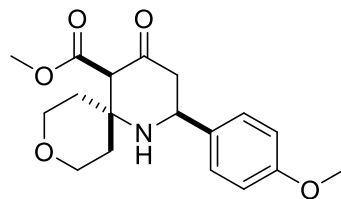

**11k**  
Two-Step  
Mixture of  
diastereomers

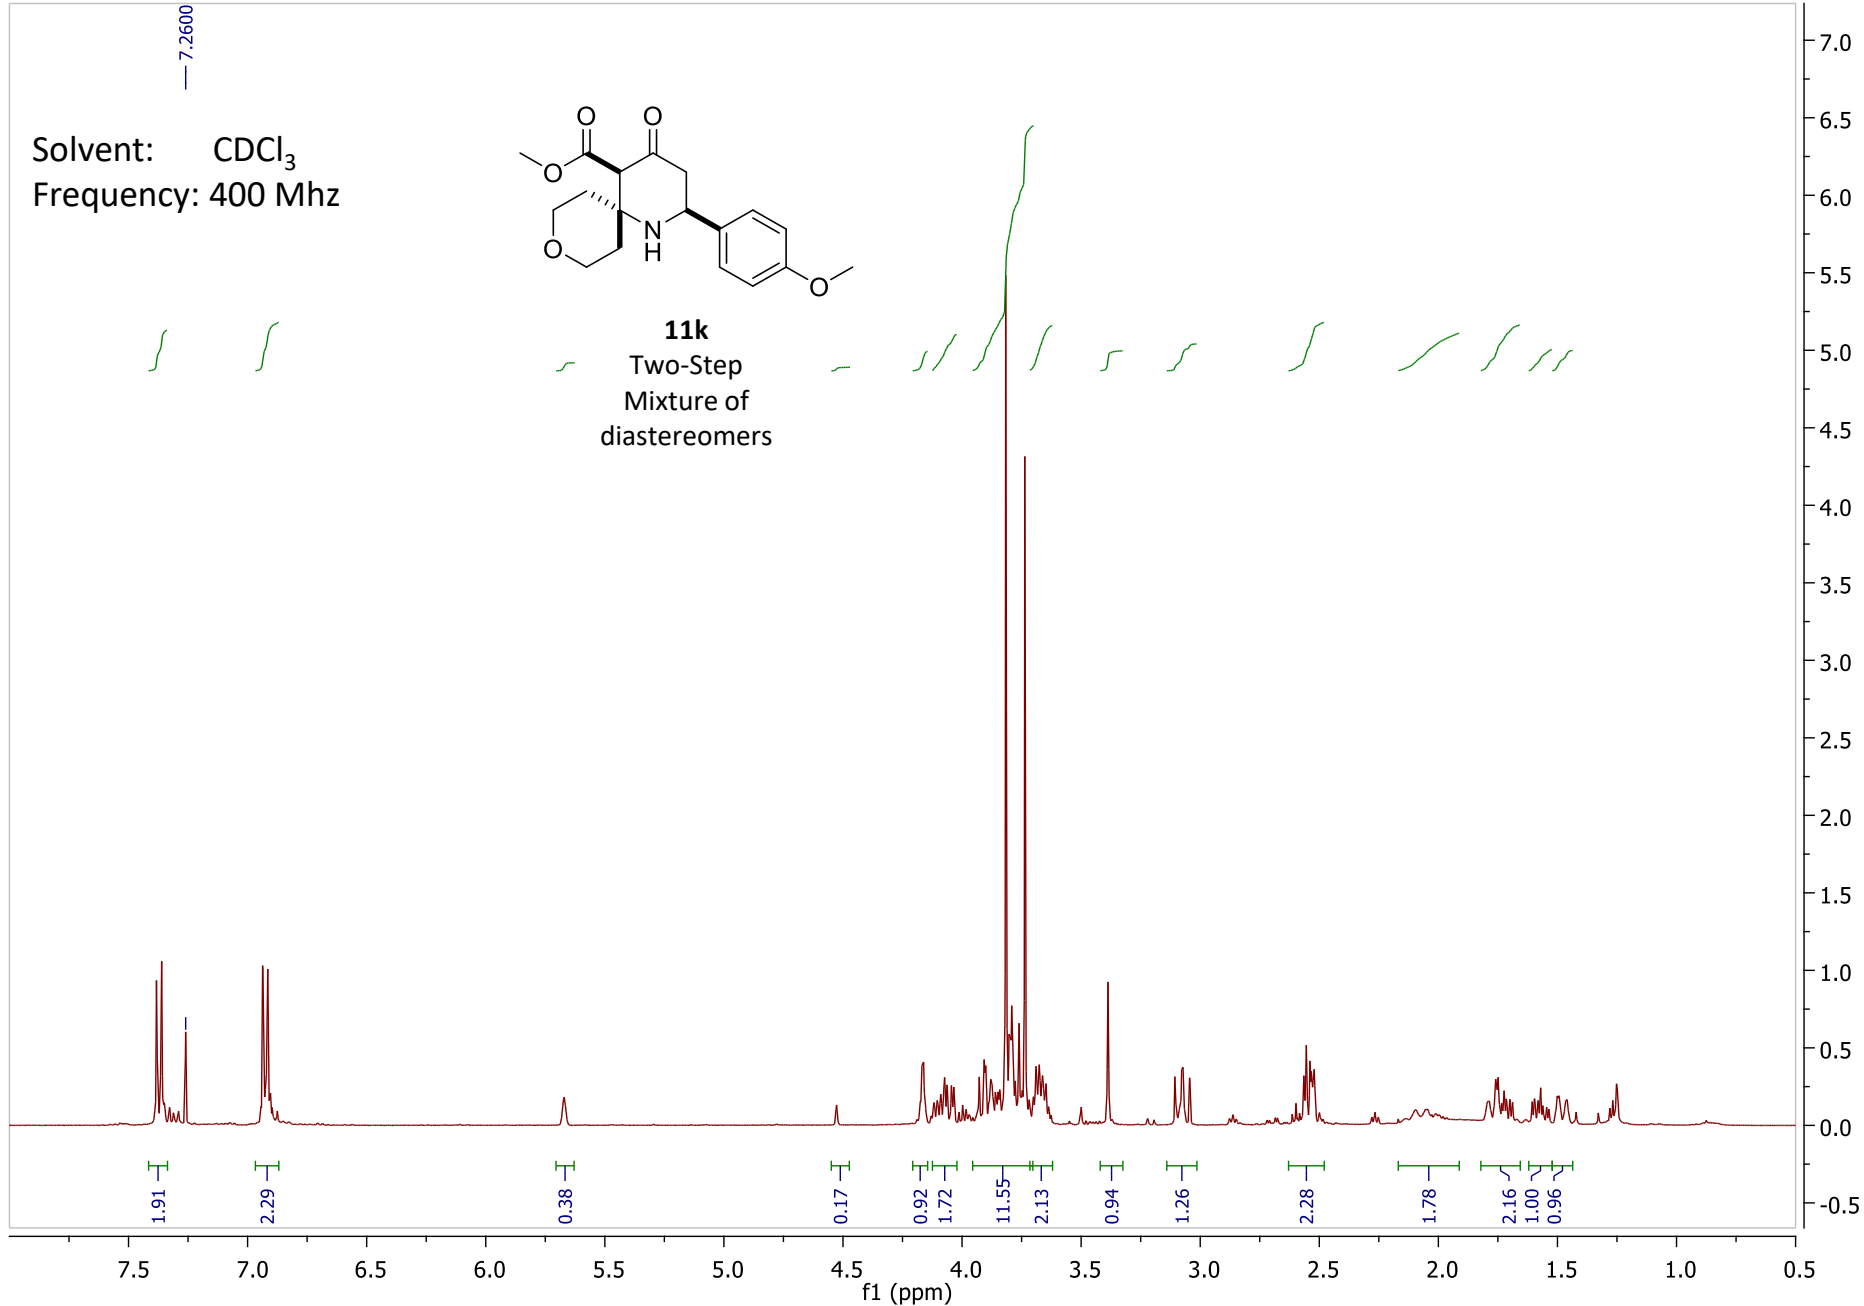

Solvent: CDCl<sub>3</sub>  
Frequency: 400 Mhz

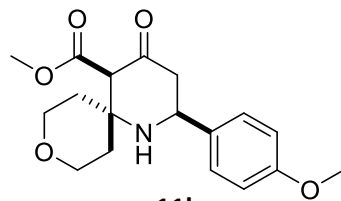

**11k**  
One-pot  
Mixture of  
diastereomers

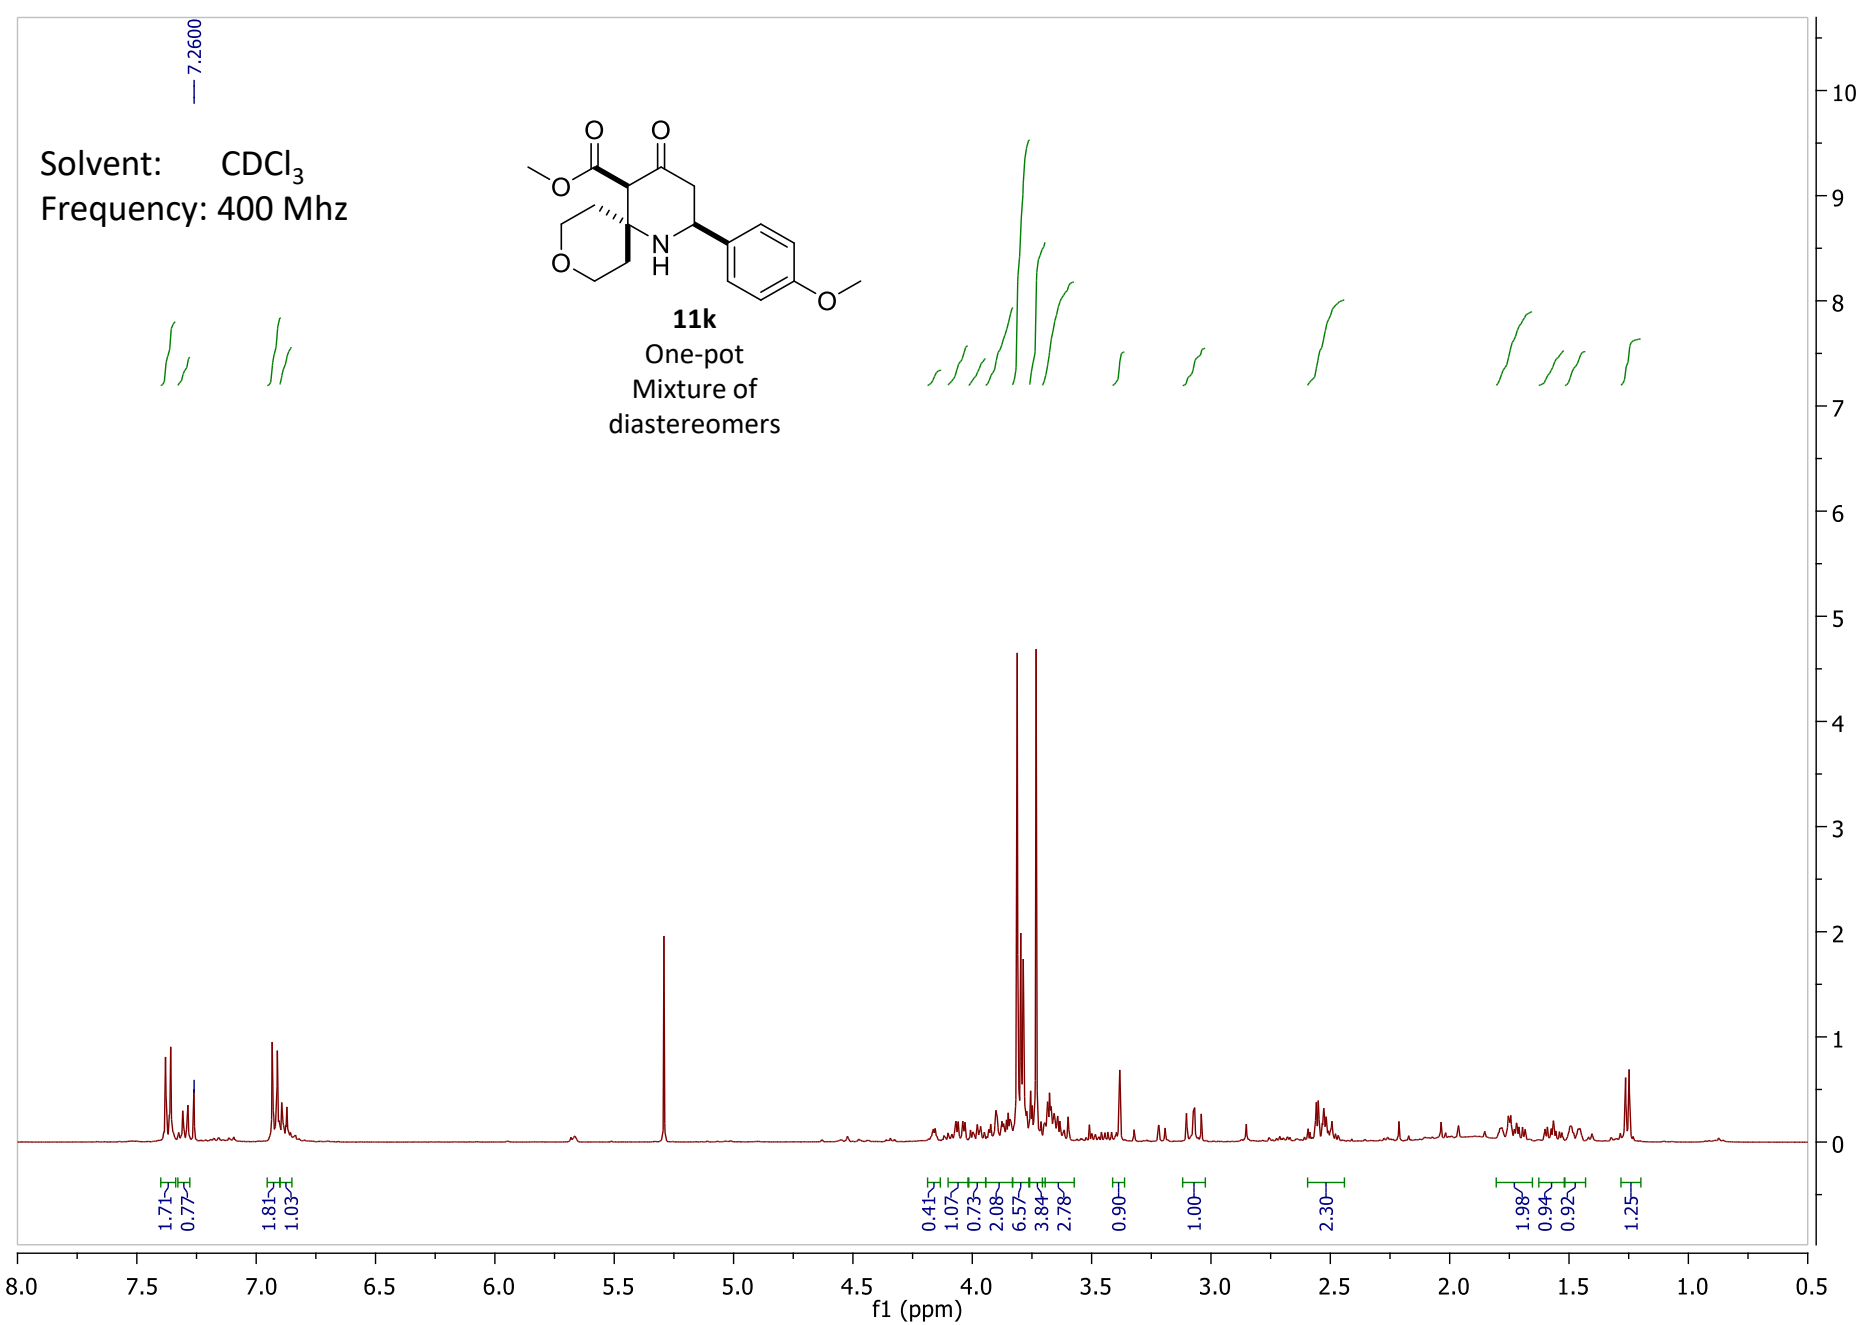



Solvent: CDCl<sub>3</sub>  
Frequency: 101 Mhz

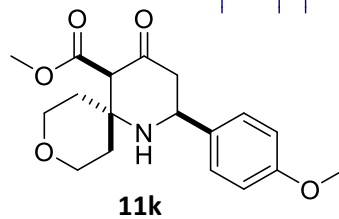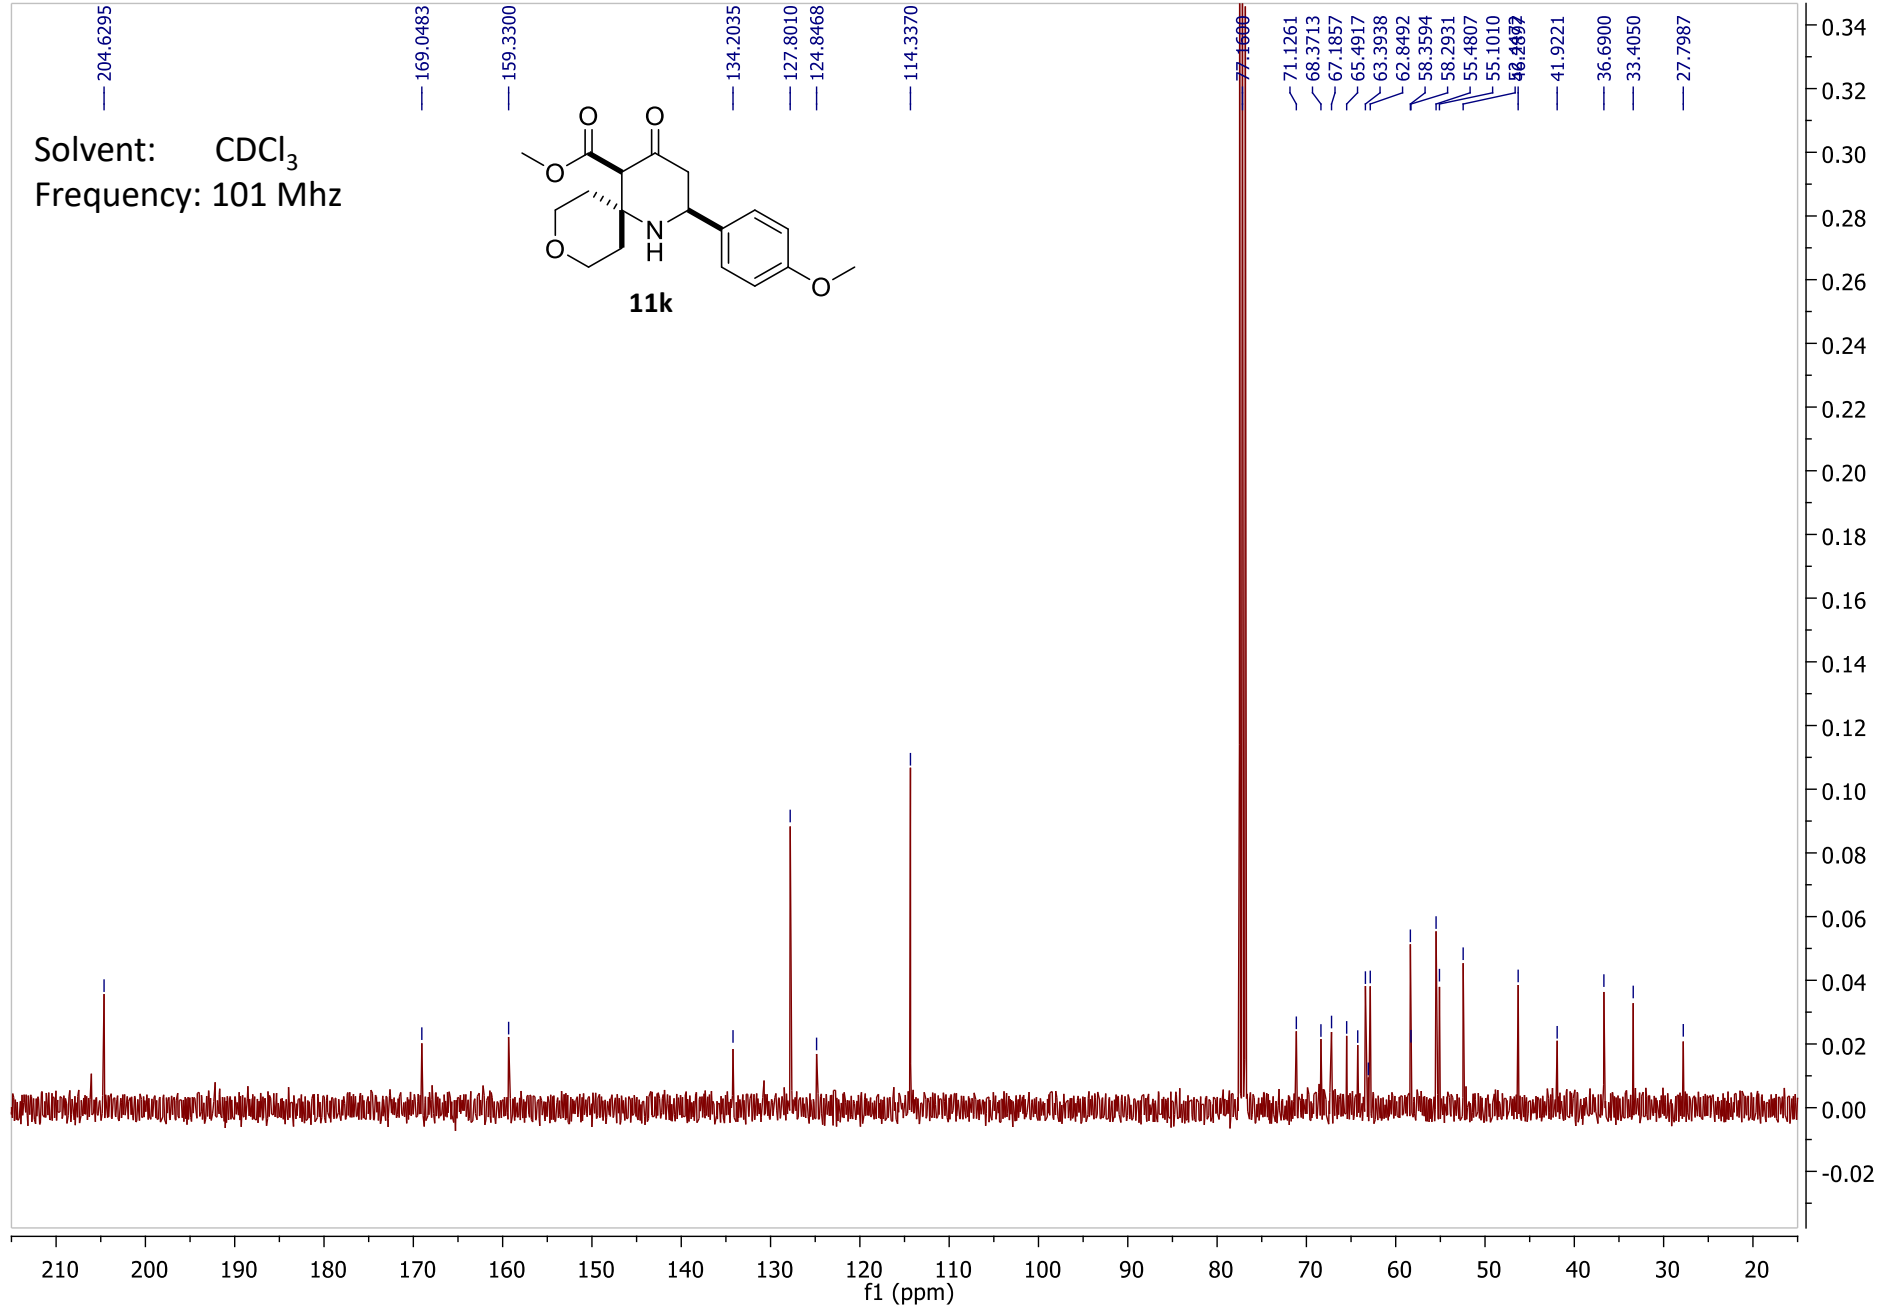

Solvent: CDCl<sub>3</sub>  
Frequency: 400 Mhz

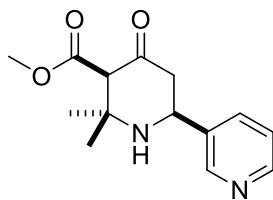

**11I**  
Mixture of  
diastereomers

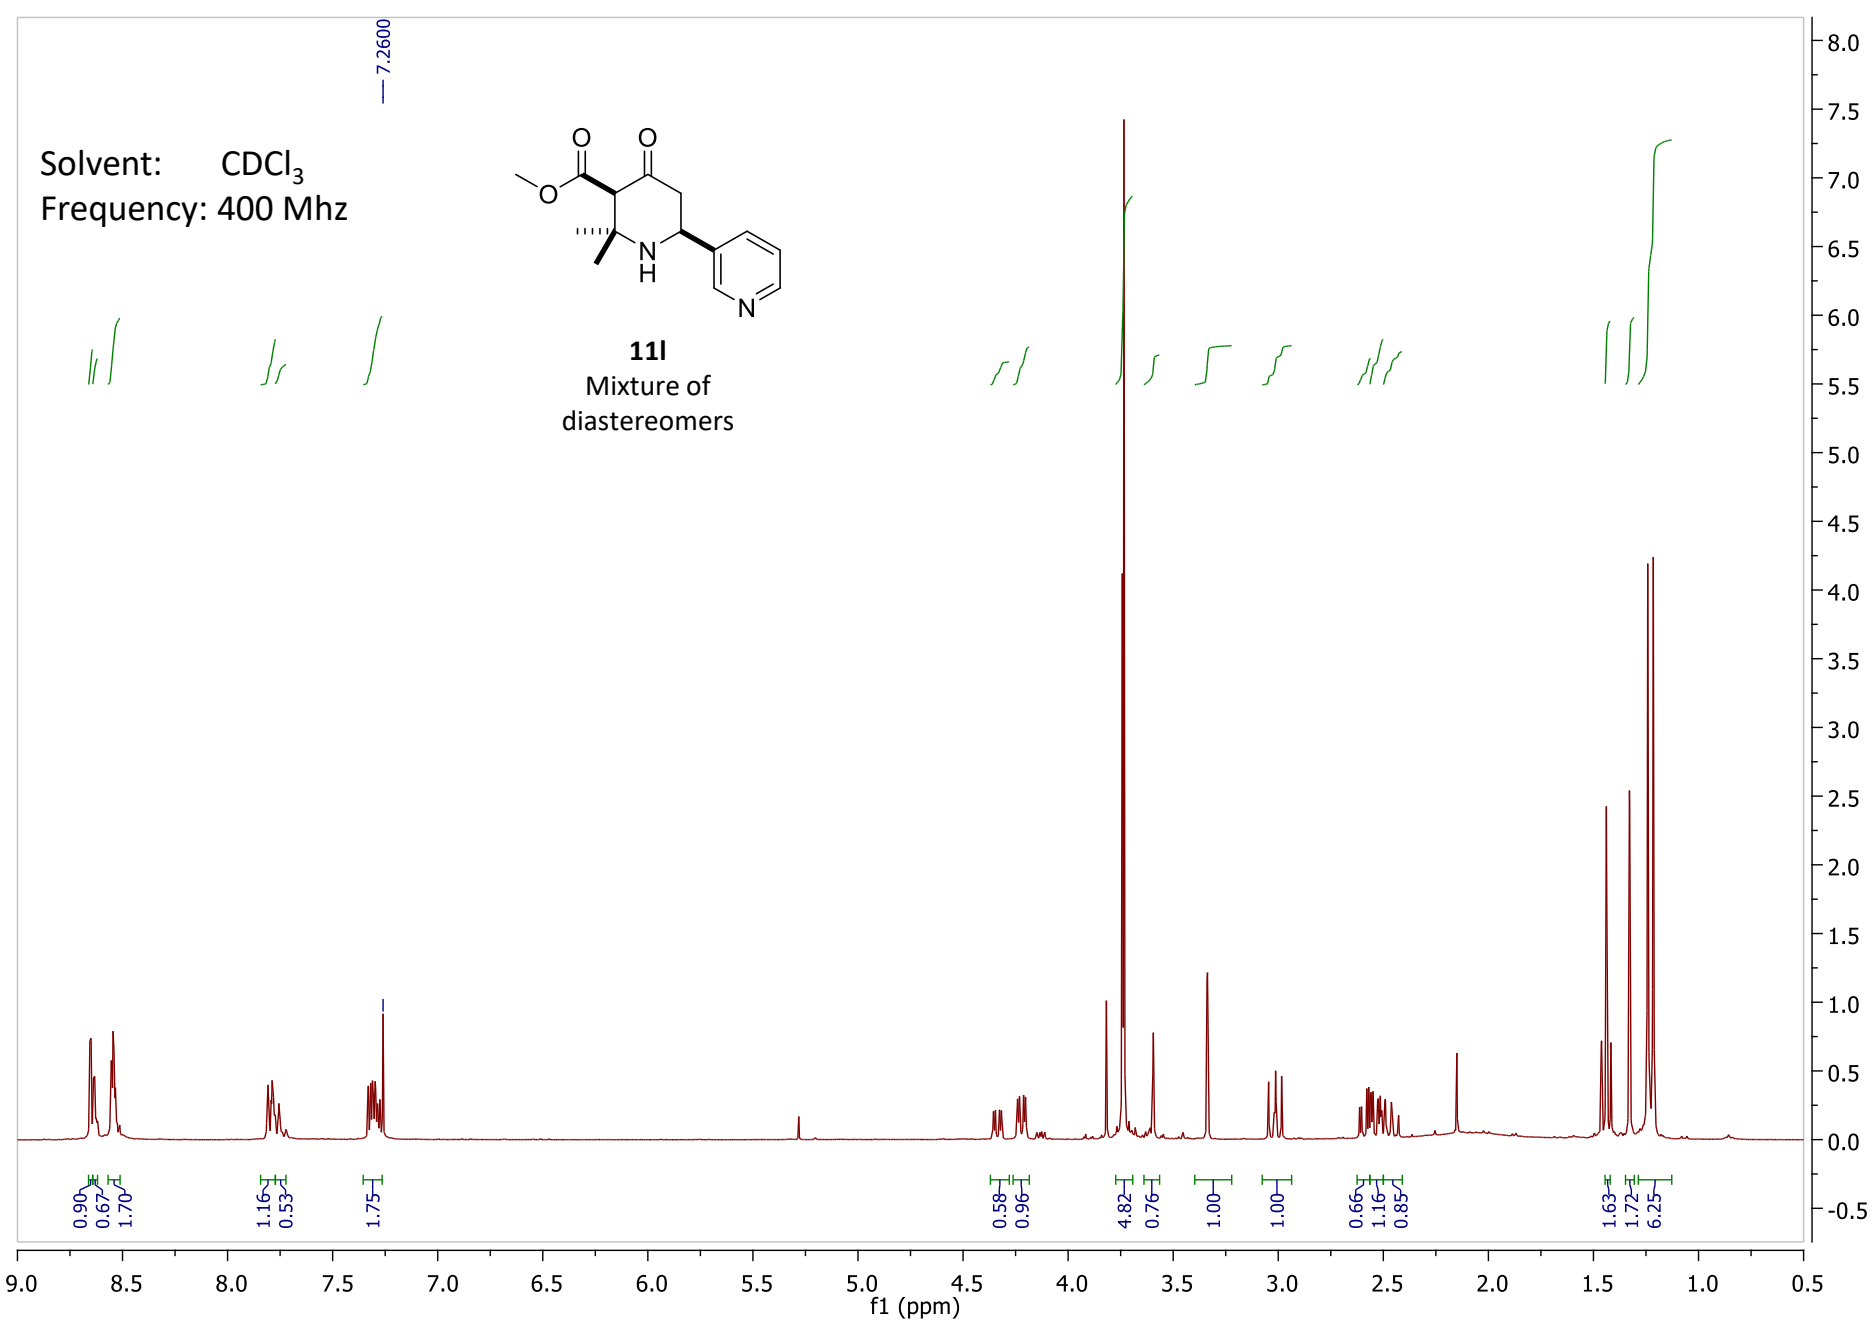

Solvent:  $\text{CDCl}_3$   
Frequency: 101 Mhz

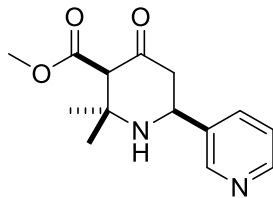

**11l**

204.2535  
203.0801

169.7022  
168.4887

149.6458  
149.4580  
148.7537  
148.6767

137.8263  
137.4167

134.3855  
134.0513

123.8849  
123.8202

77.1600

67.2326  
66.9168

57.9951  
56.9822

54.3519  
53.6462

52.4526  
52.0024

48.9006  
45.3600

31.0578  
30.1722

28.3209  
25.8998

22.6549

f1 (ppm)

Solvent:  $\text{CDCl}_3$   
Frequency: 400 Mhz

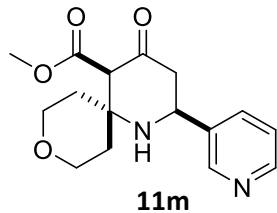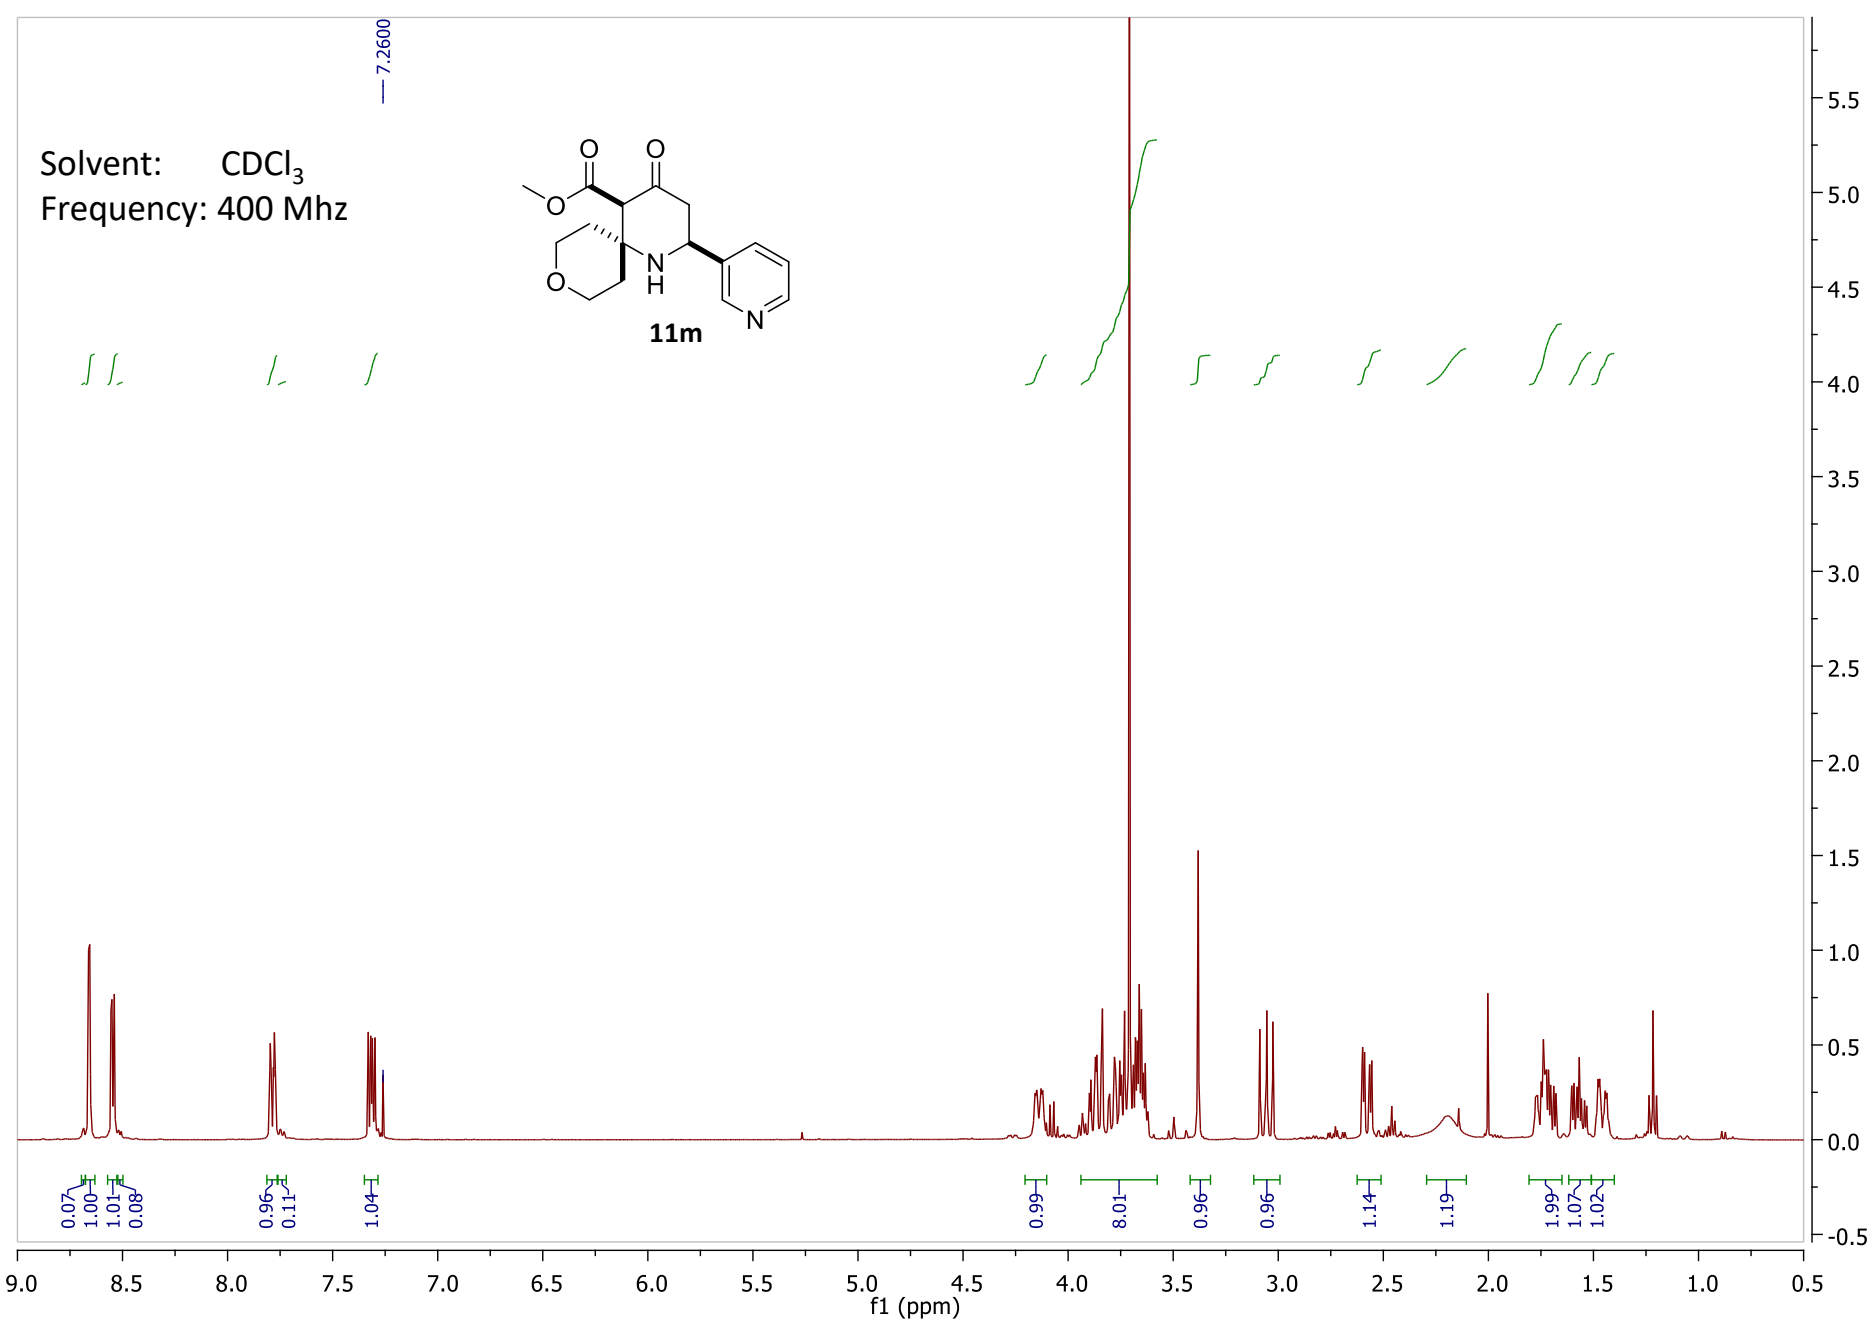

Solvent: CDCl<sub>3</sub>  
Frequency: 101 Mhz



— 203.5105

— 168.8866

— 149.3953

— 148.6733

— 137.1741

— 133.9898

— 123.7974

— 77.1600

— 66.9403

— 63.2502

— 62.6710

— 58.2753

— 53.1088

— 52.4942

— 45.2627

— 36.5306

— 33.1792

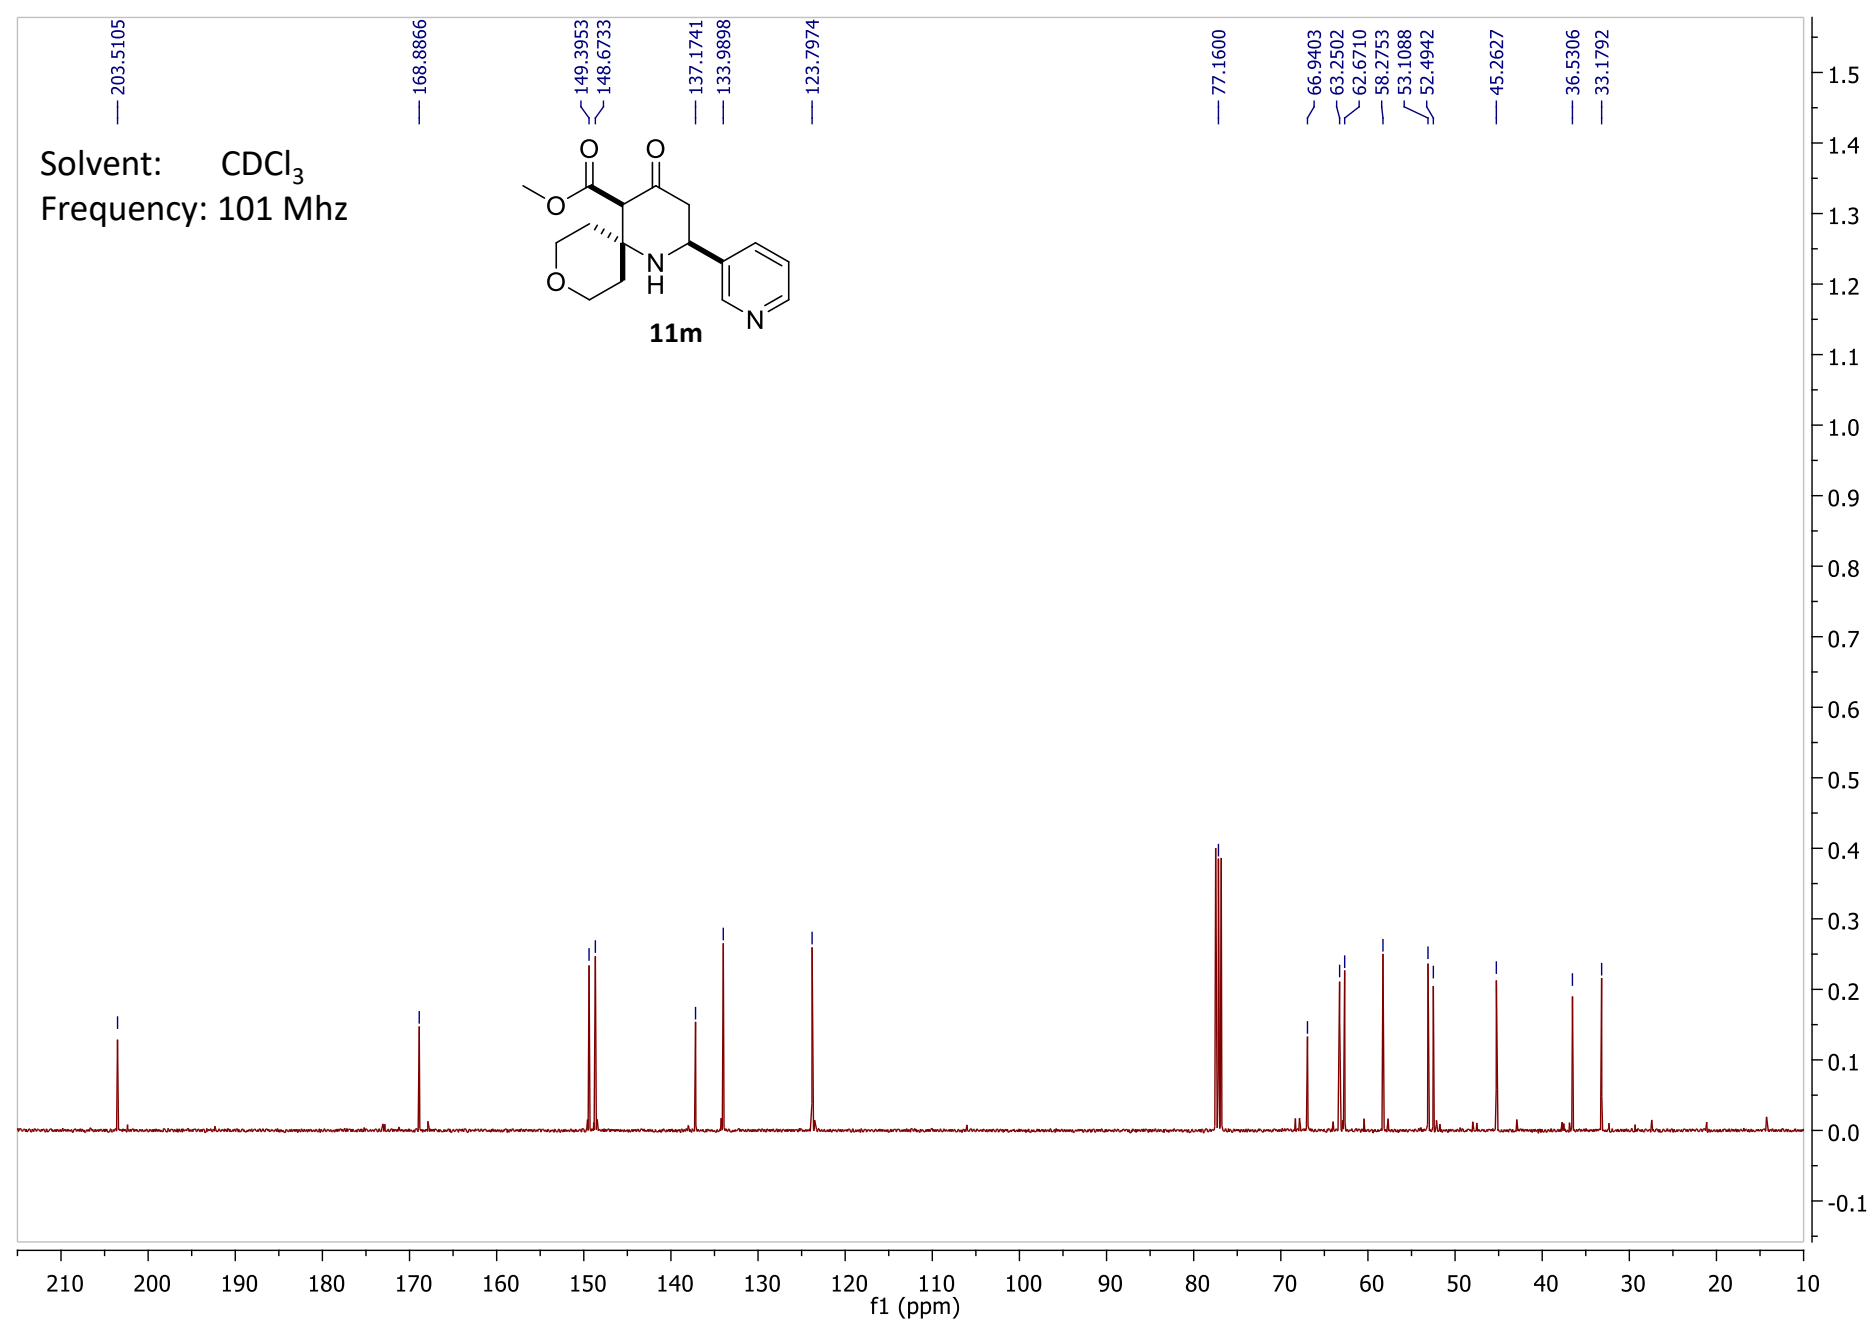

Solvent: CDCl<sub>3</sub>  
Frequency: 400 Mhz

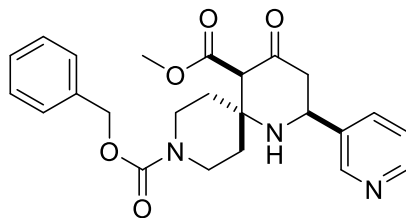

**11n**  
Mixture of  
diastereomers  
rotamers

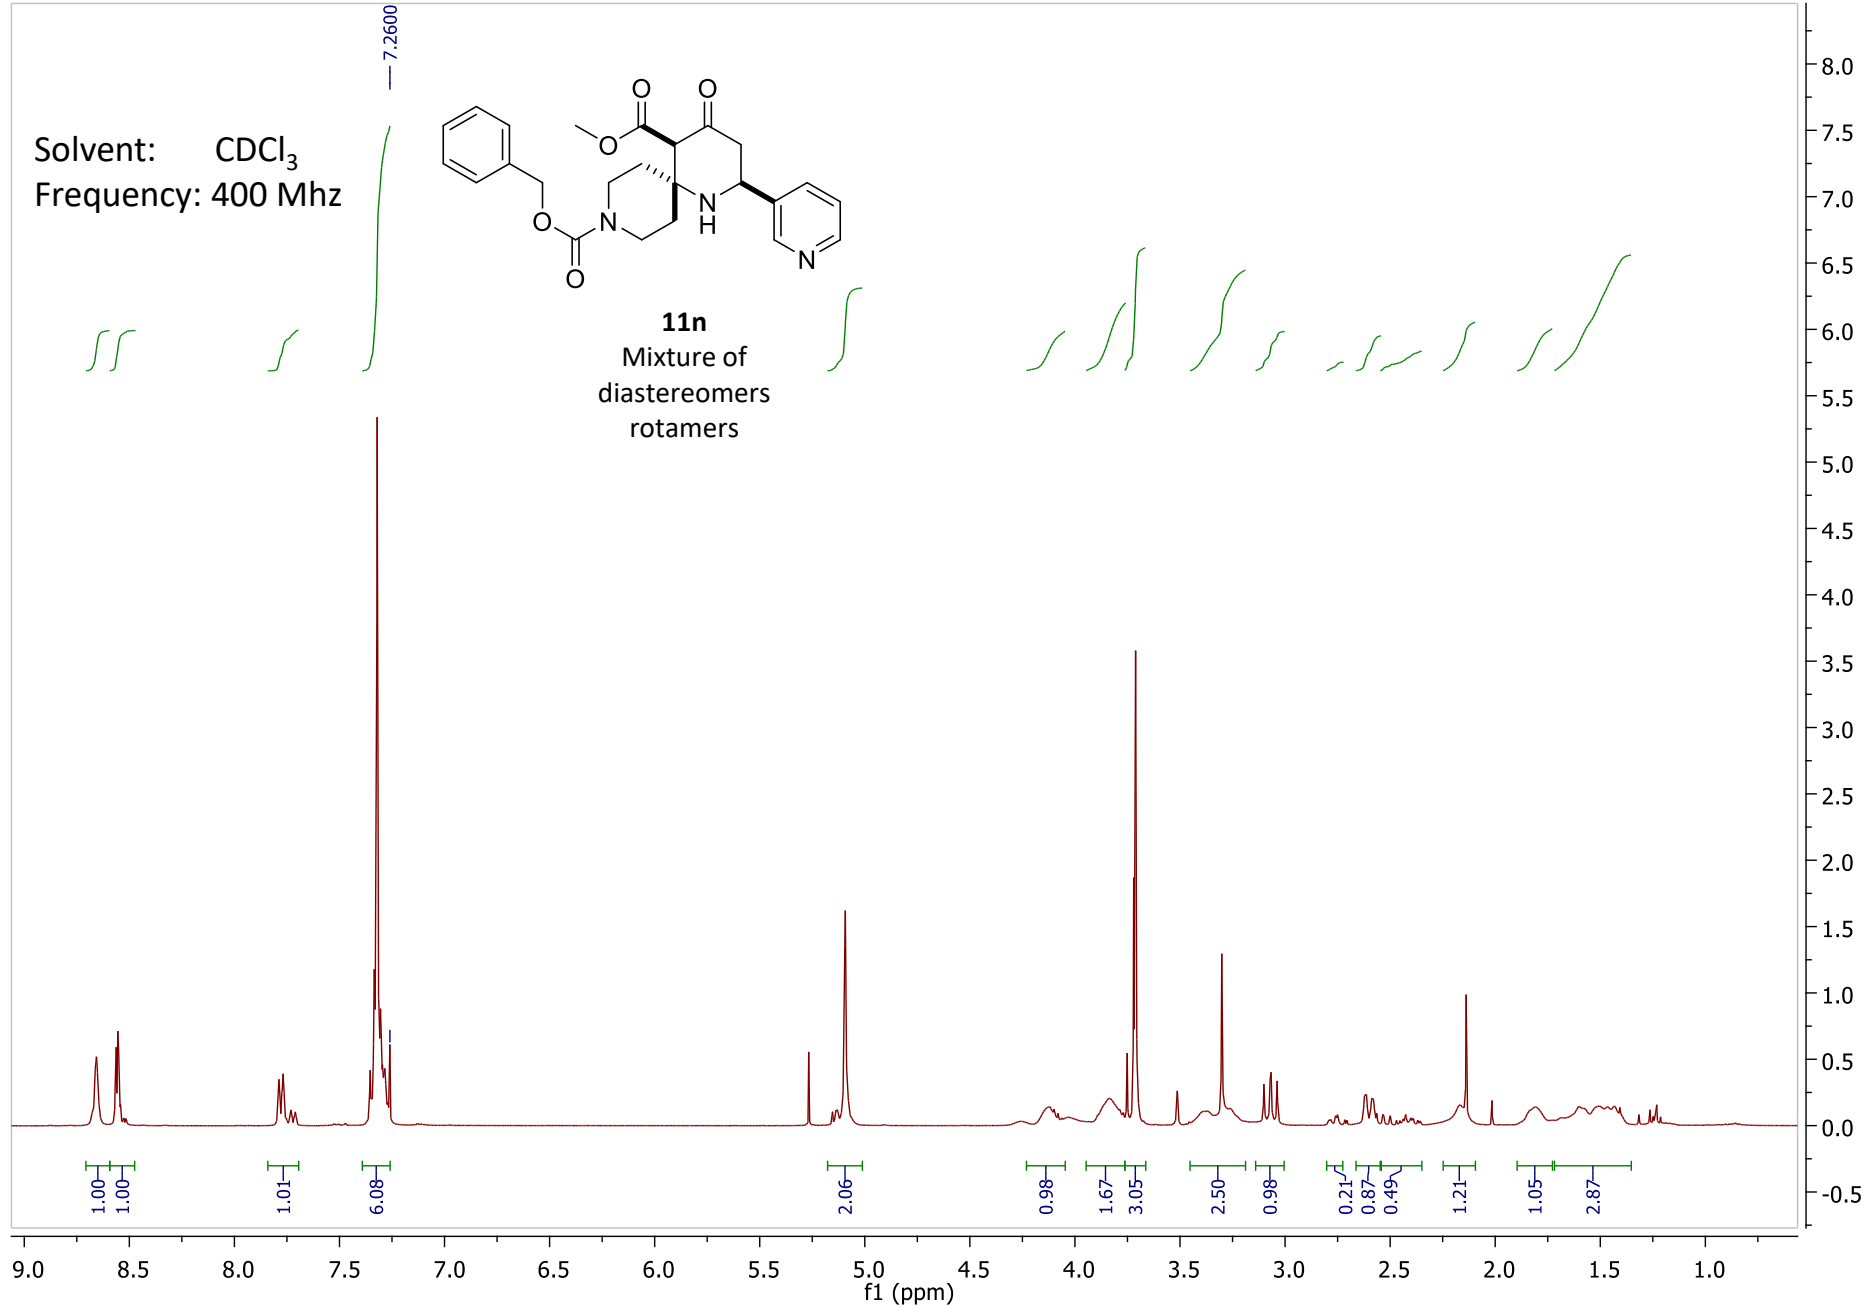

Solvent:  $\text{CDCl}_3$   
Frequency: 101 Mhz

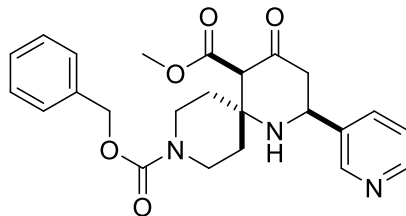

**11n**

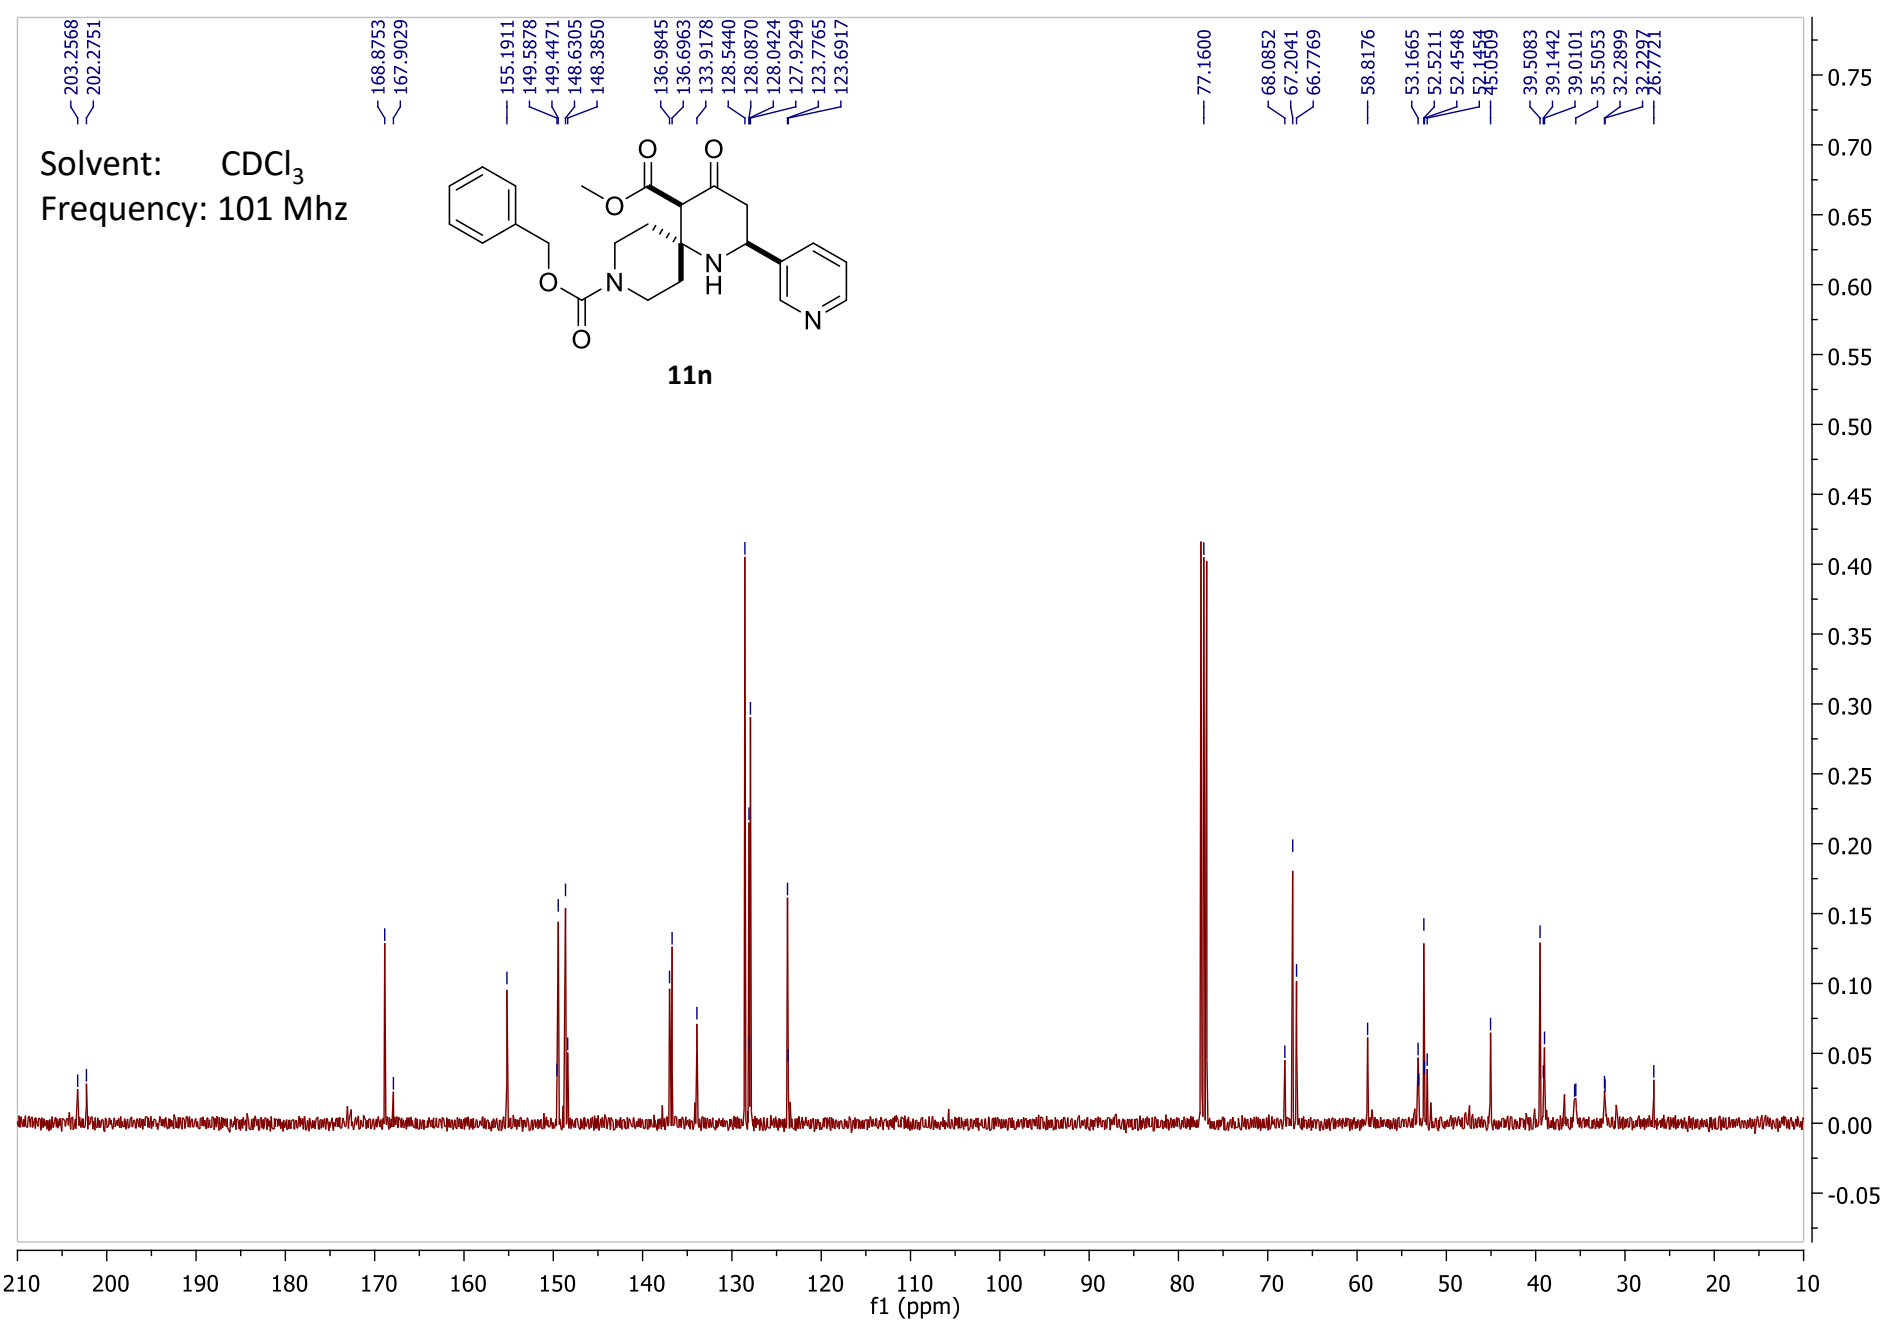

Solvent: CDCl<sub>3</sub>  
Frequency: 400 Mhz

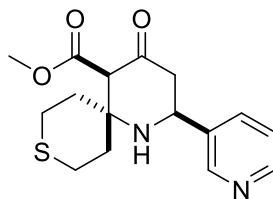

**11o**  
Mixture of  
diastereomers

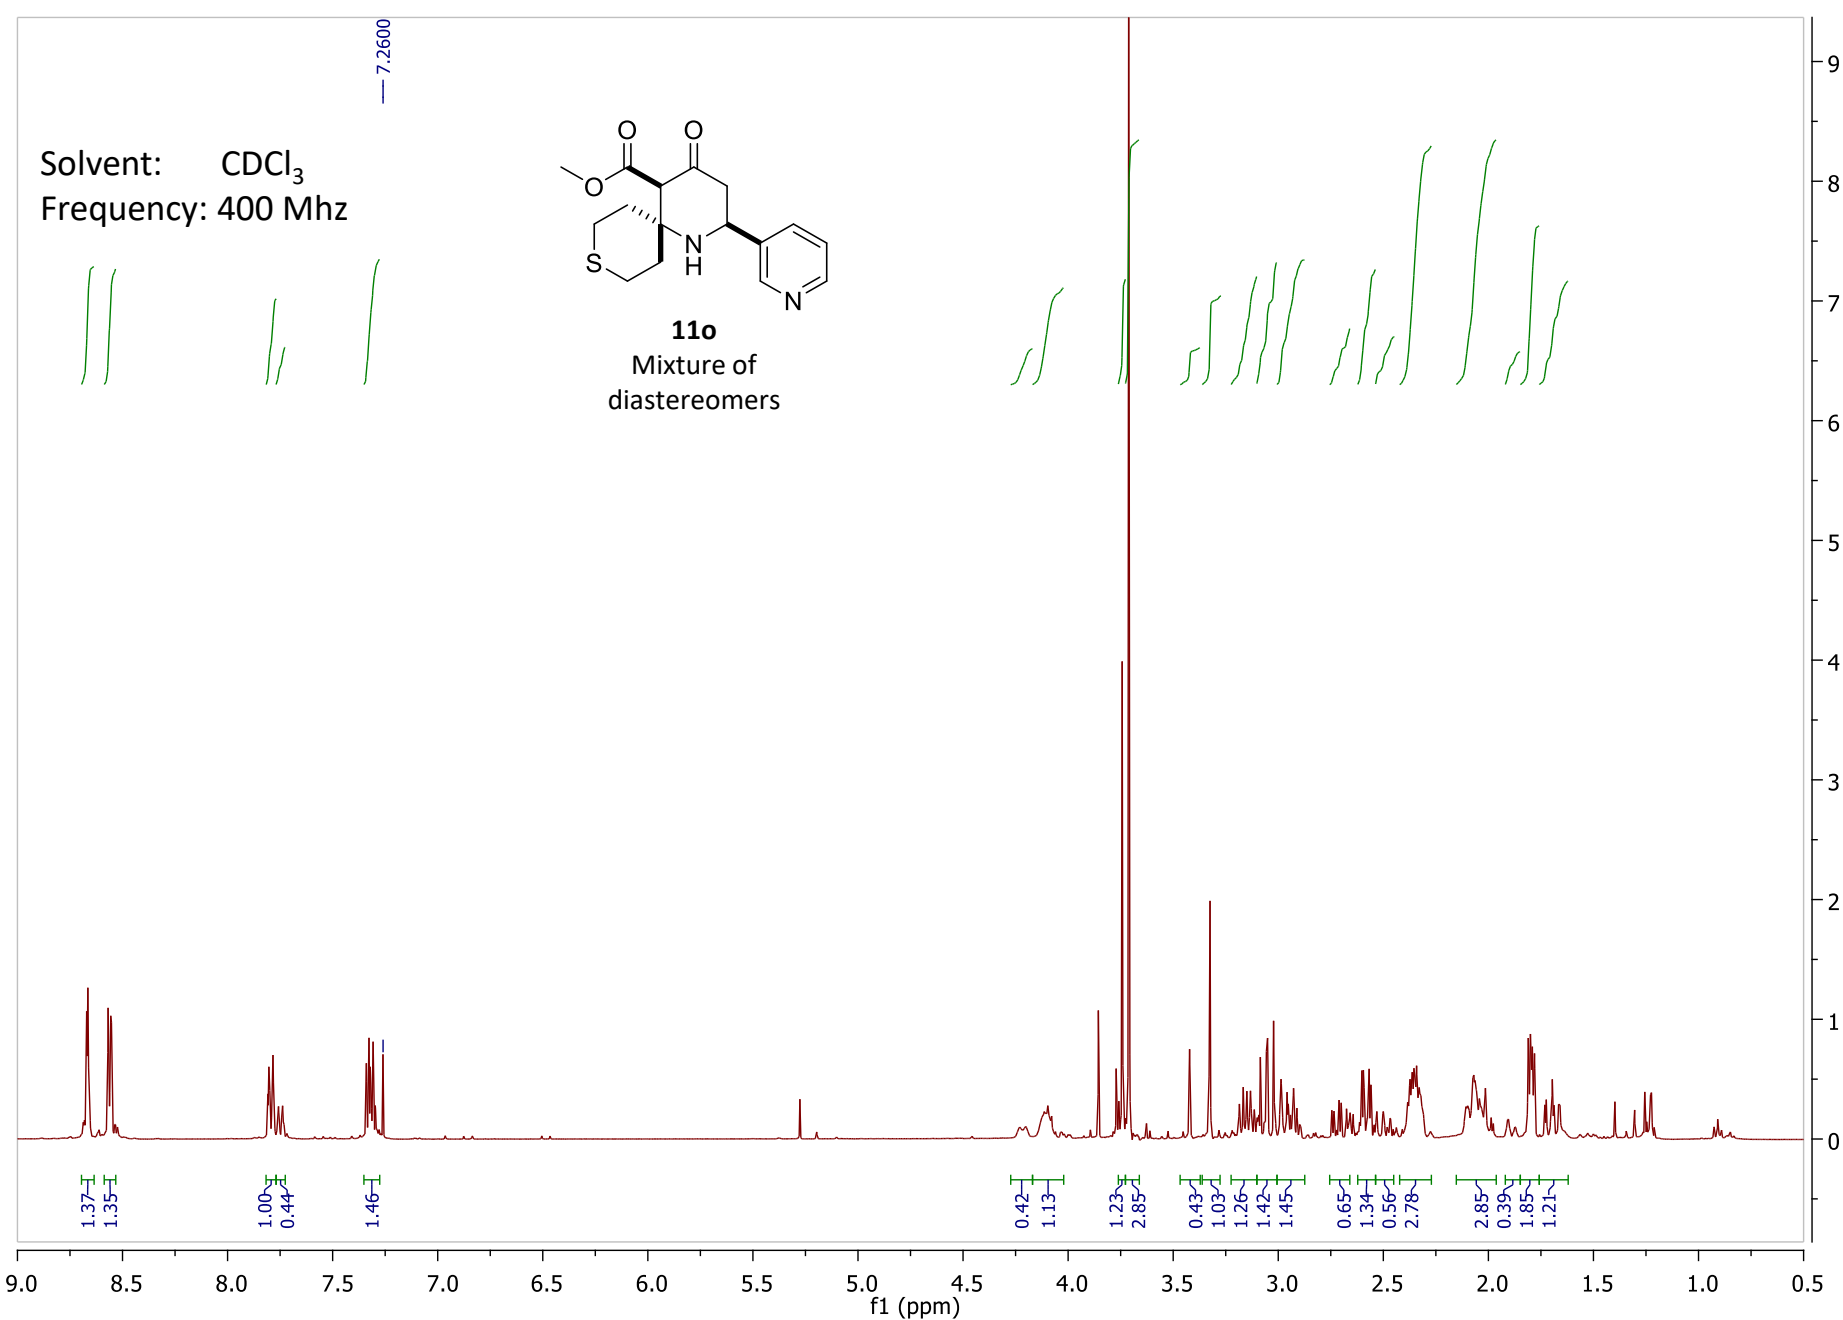



Solvent: CDCl<sub>3</sub>  
Frequency: 101 Mhz

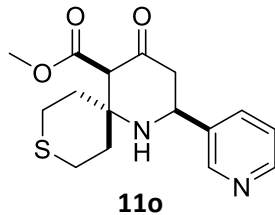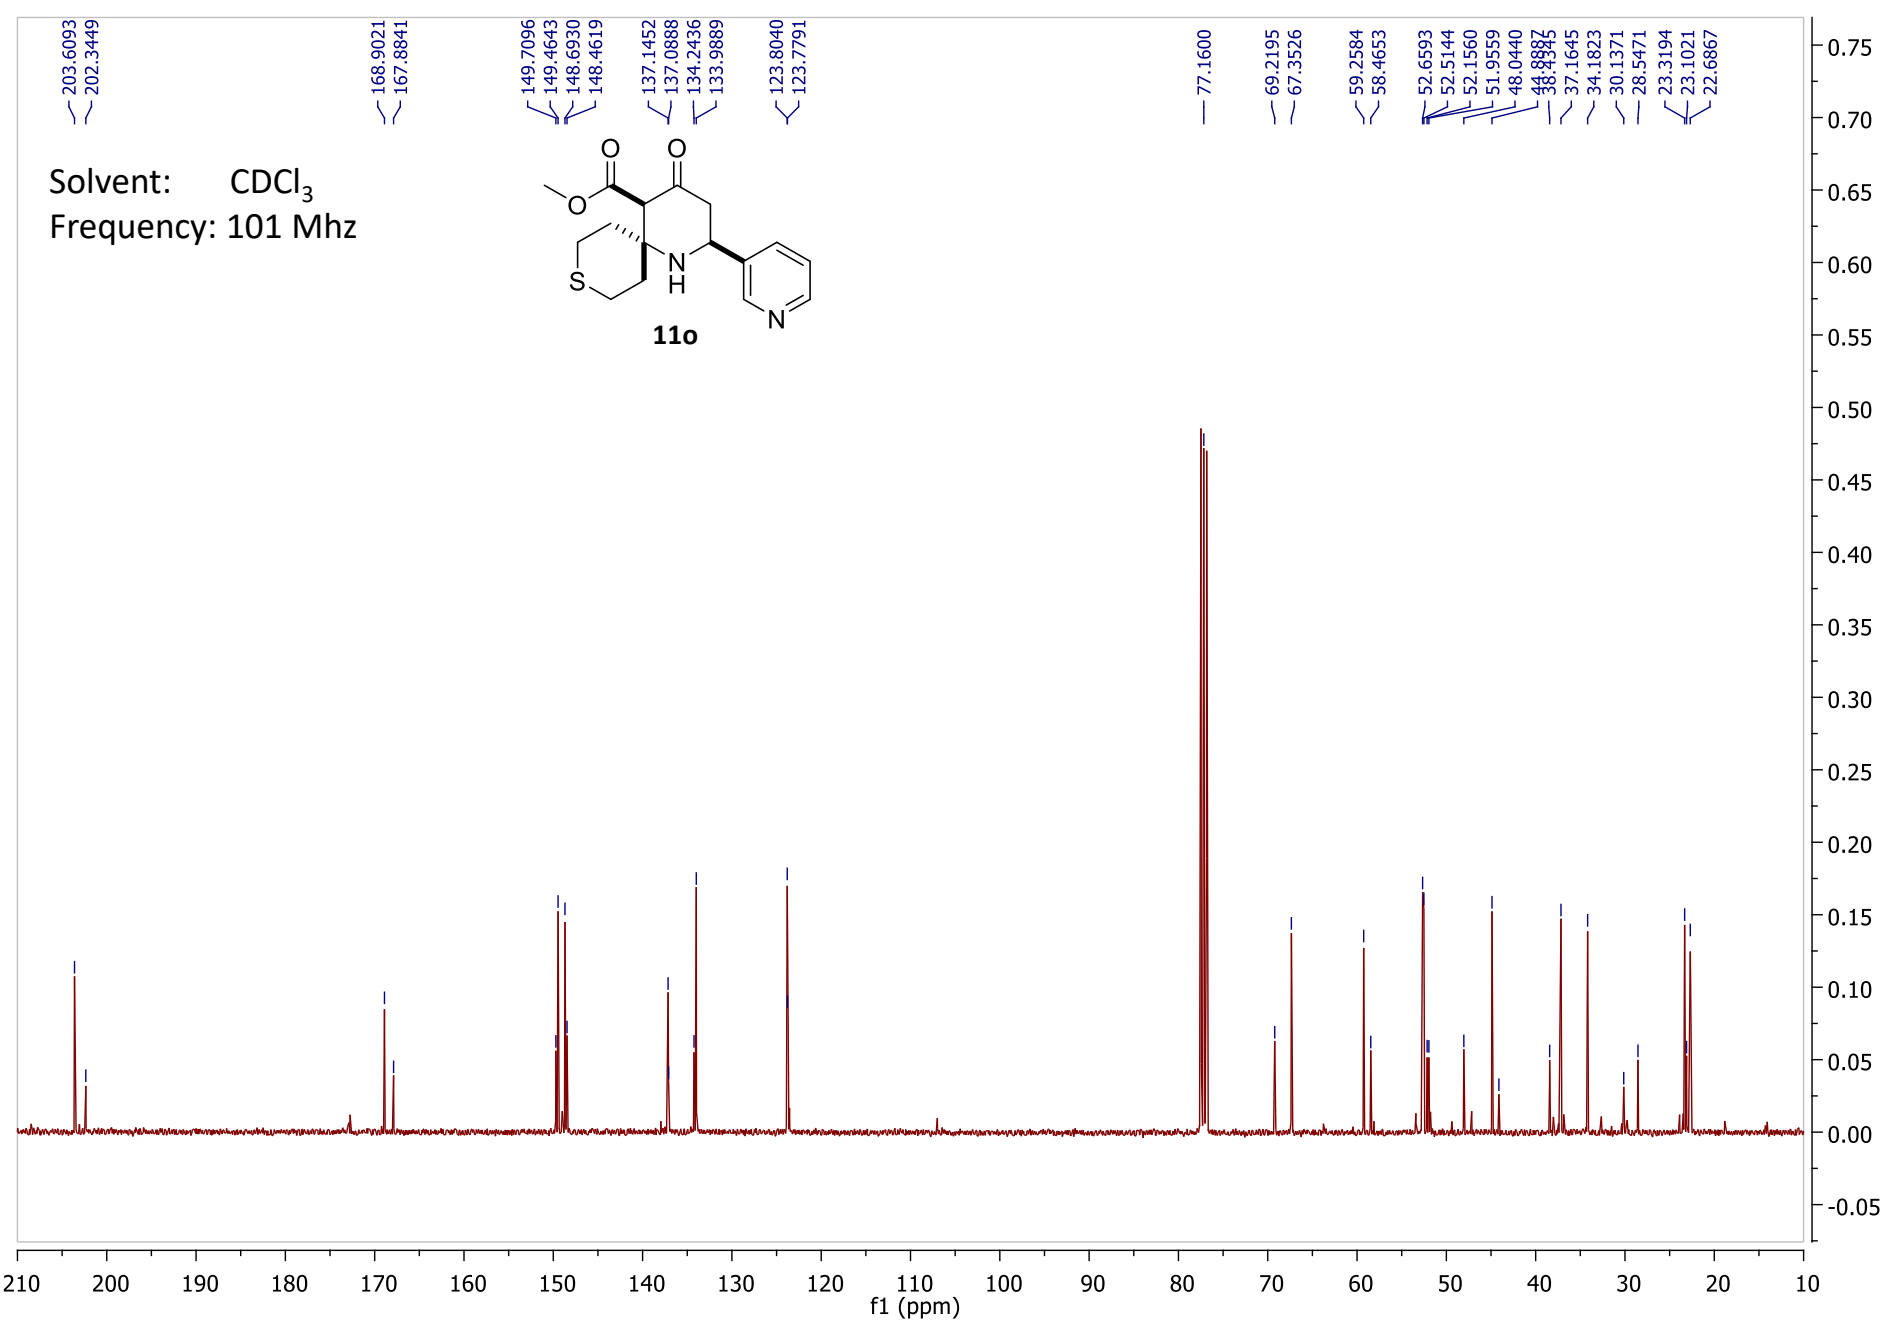

Solvent: CDCl<sub>3</sub>  
Frequency: 400 Mhz

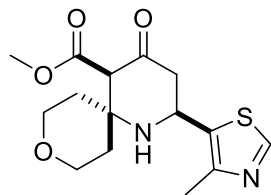

**11p**  
Two-step  
Mixture of  
diastereomers

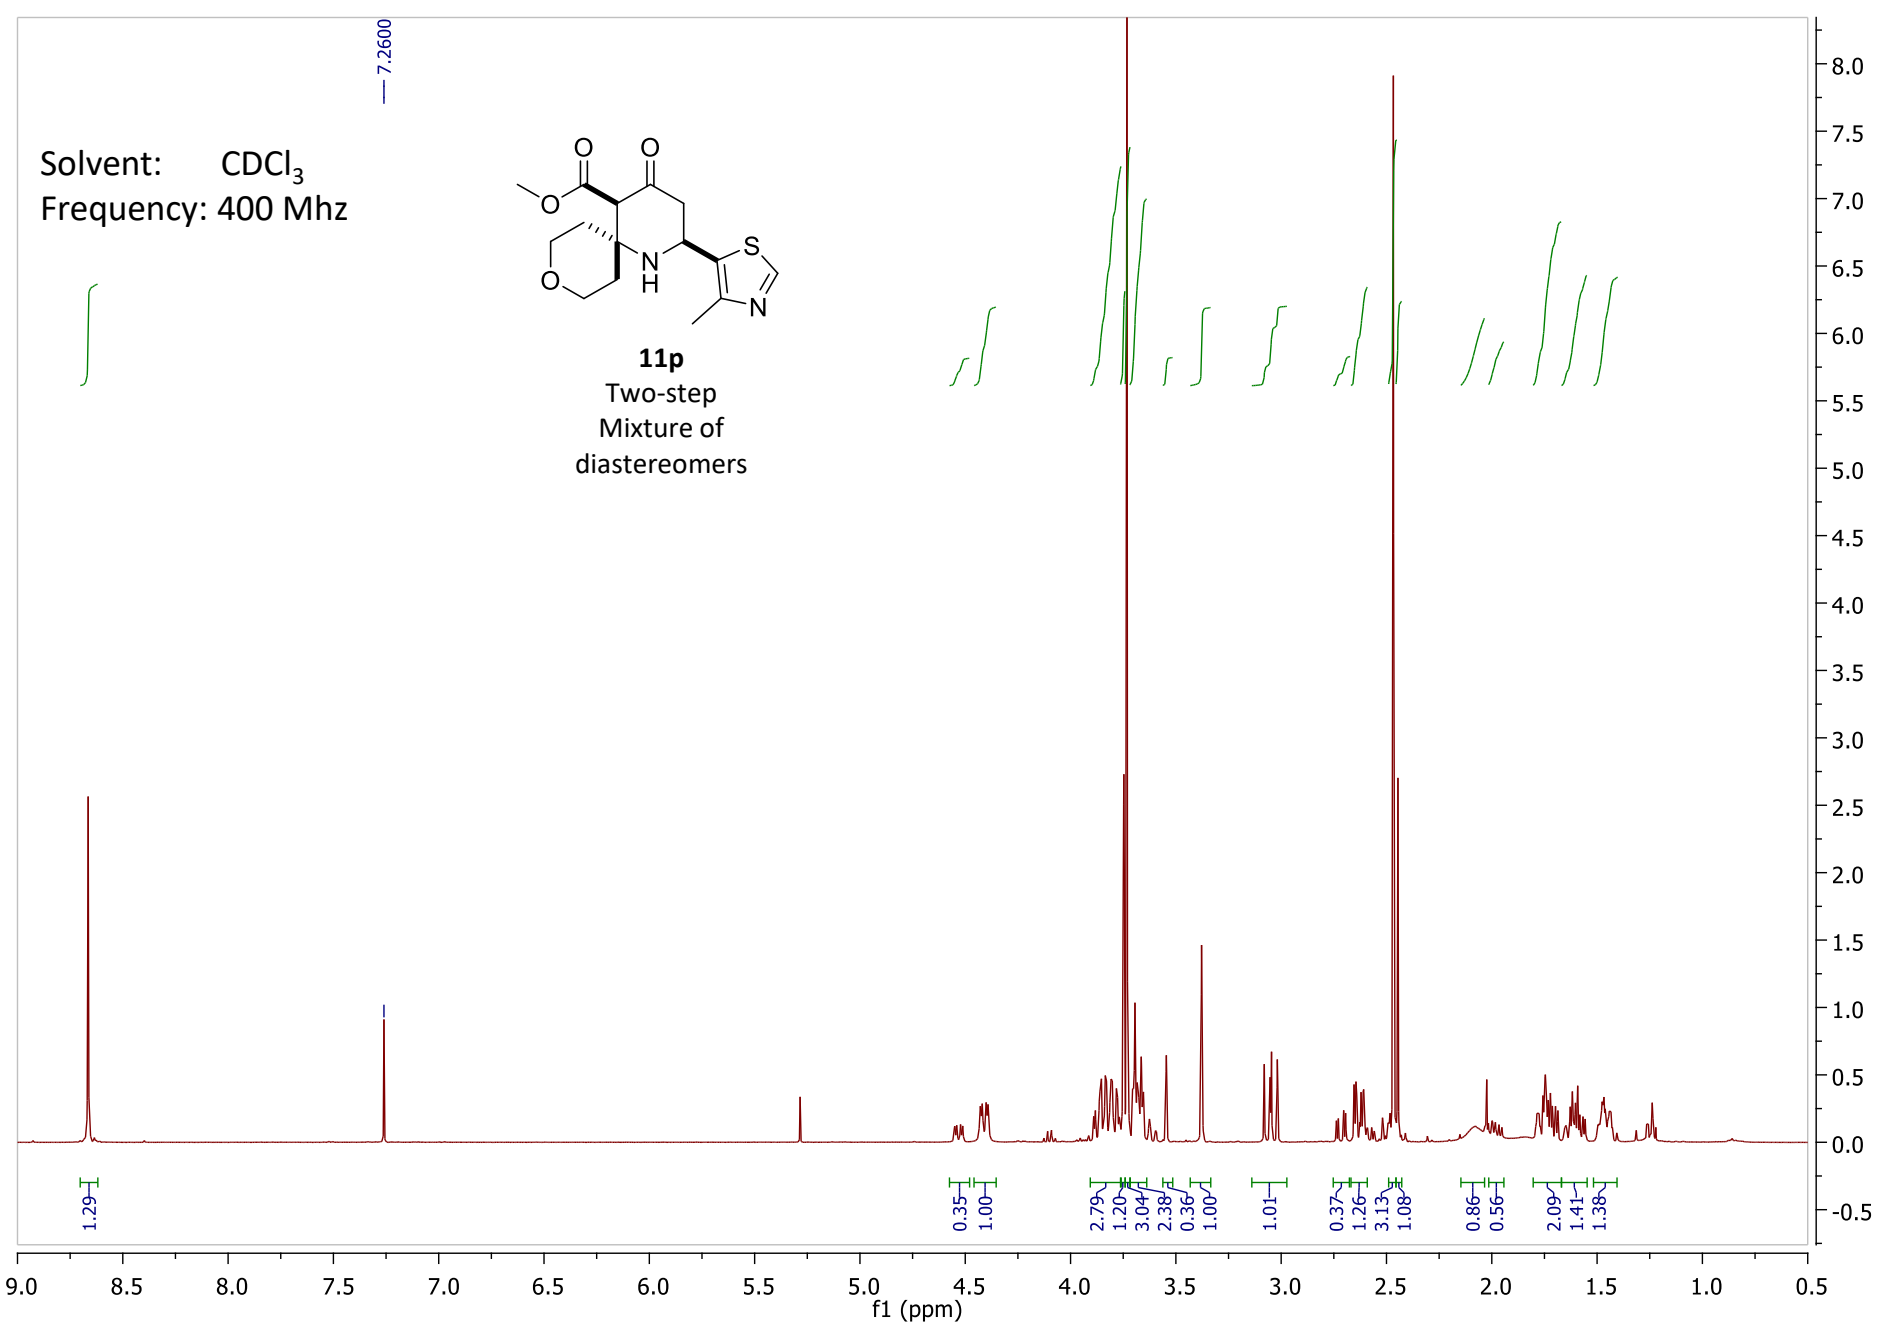

Solvent: CDCl<sub>3</sub>  
Frequency: 400 Mhz



**11p**  
One-pot  
Mixture of  
diastereomers

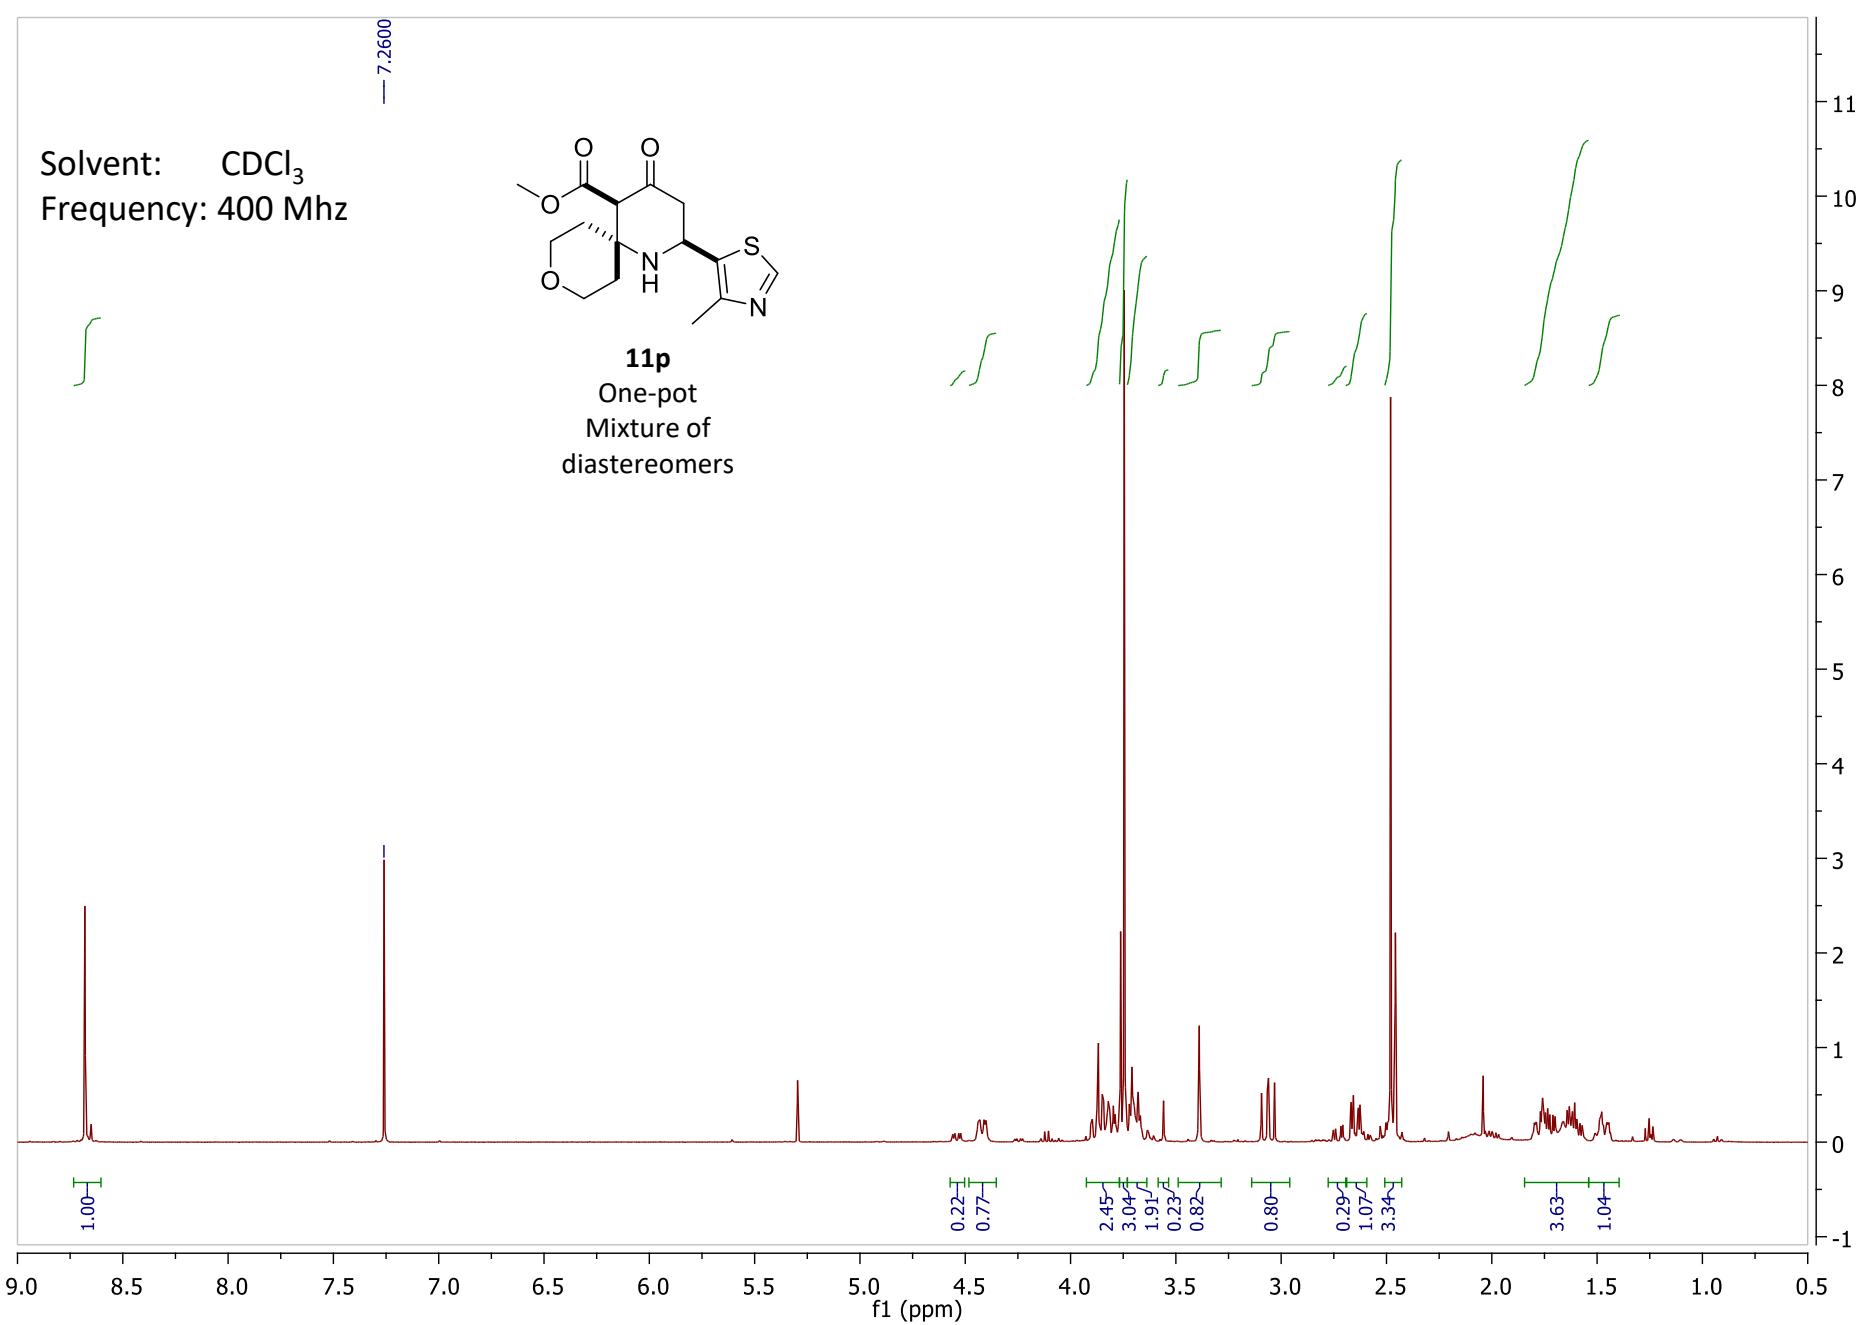

Solvent:  $\text{CDCl}_3$   
Frequency: 101 Mhz

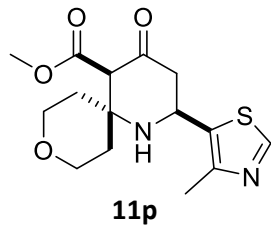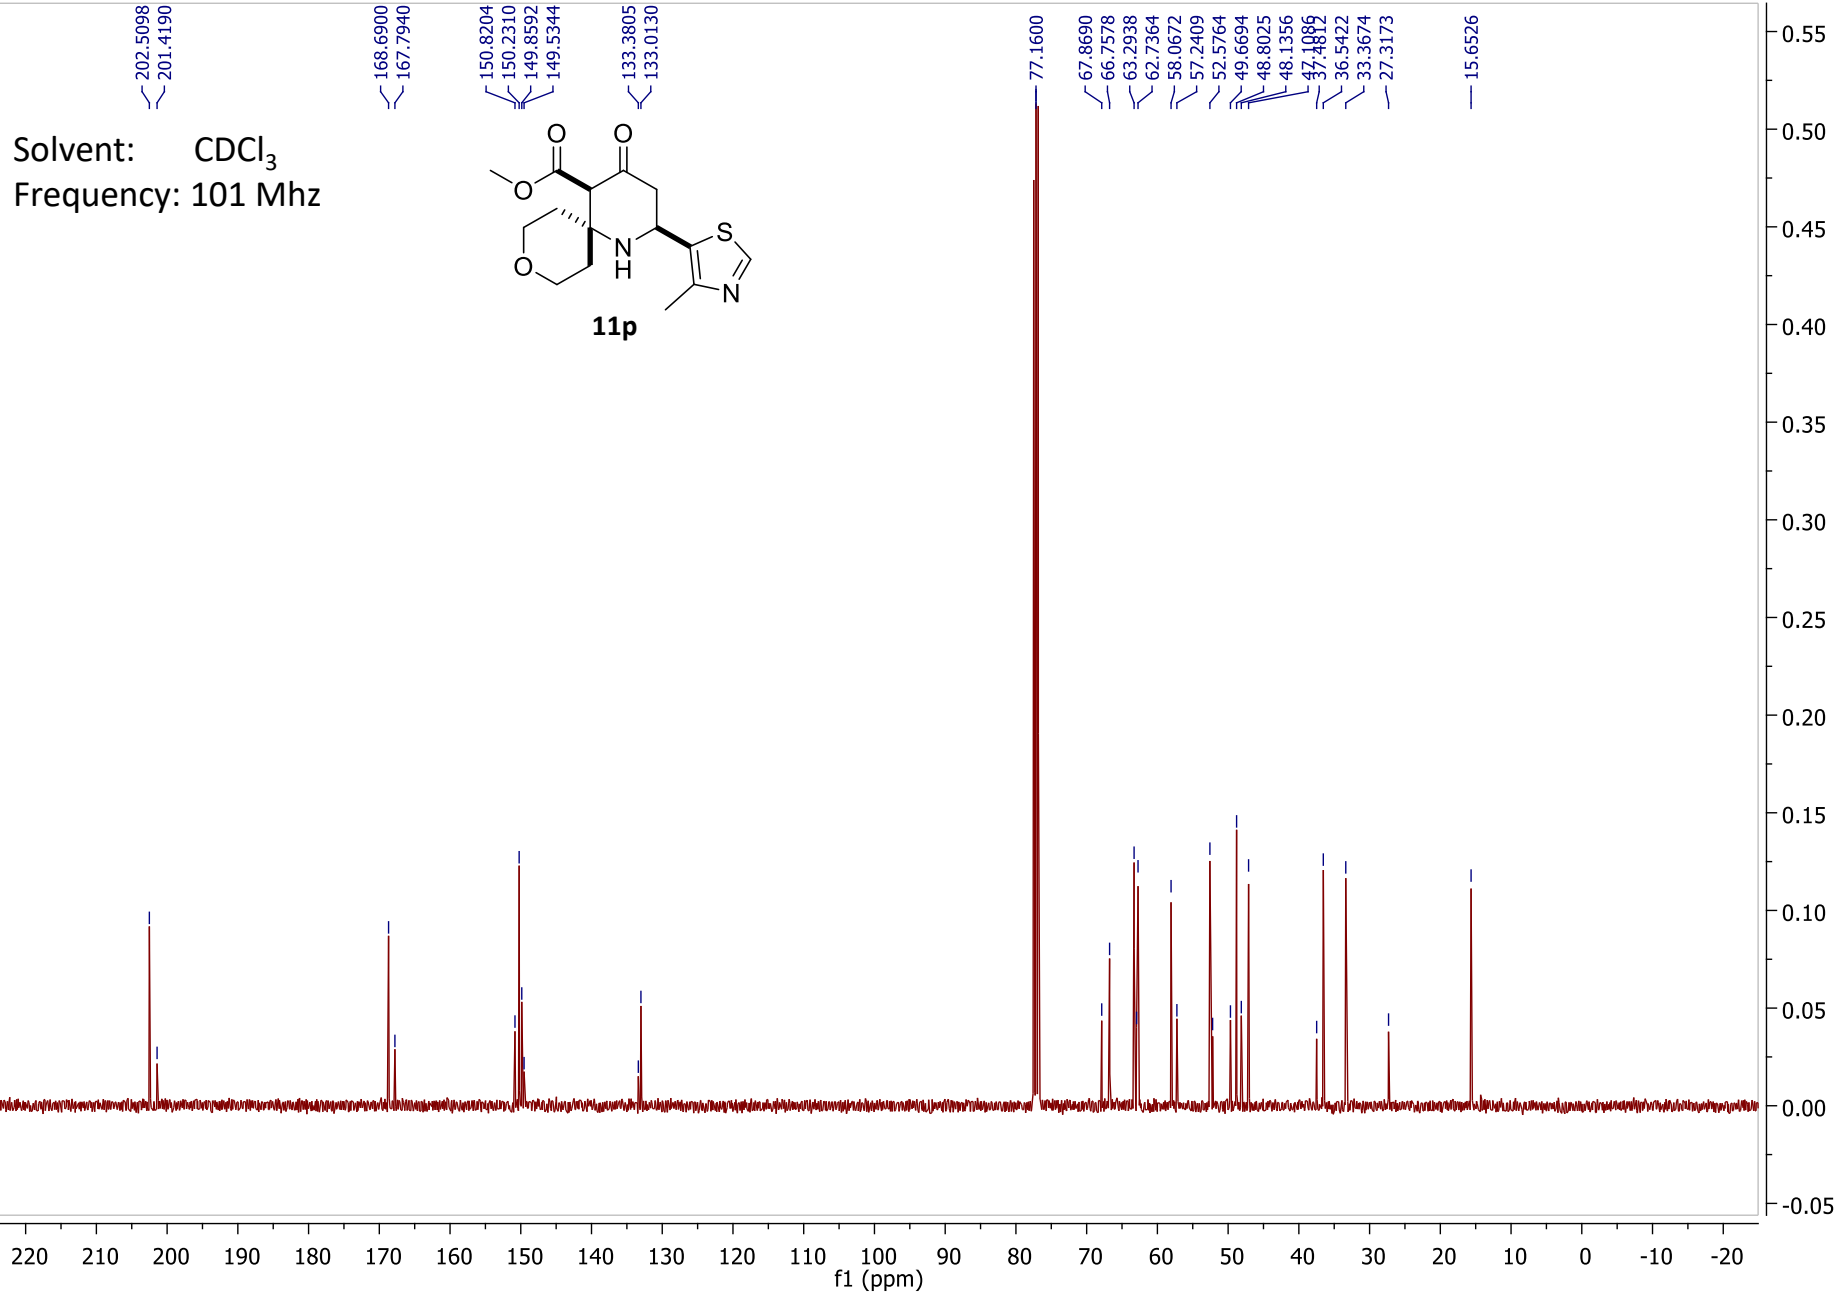

Solvent: CDCl<sub>3</sub>  
Frequency: 400 Mhz

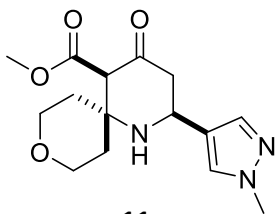

**11q**  
Mixture of  
diastereomers

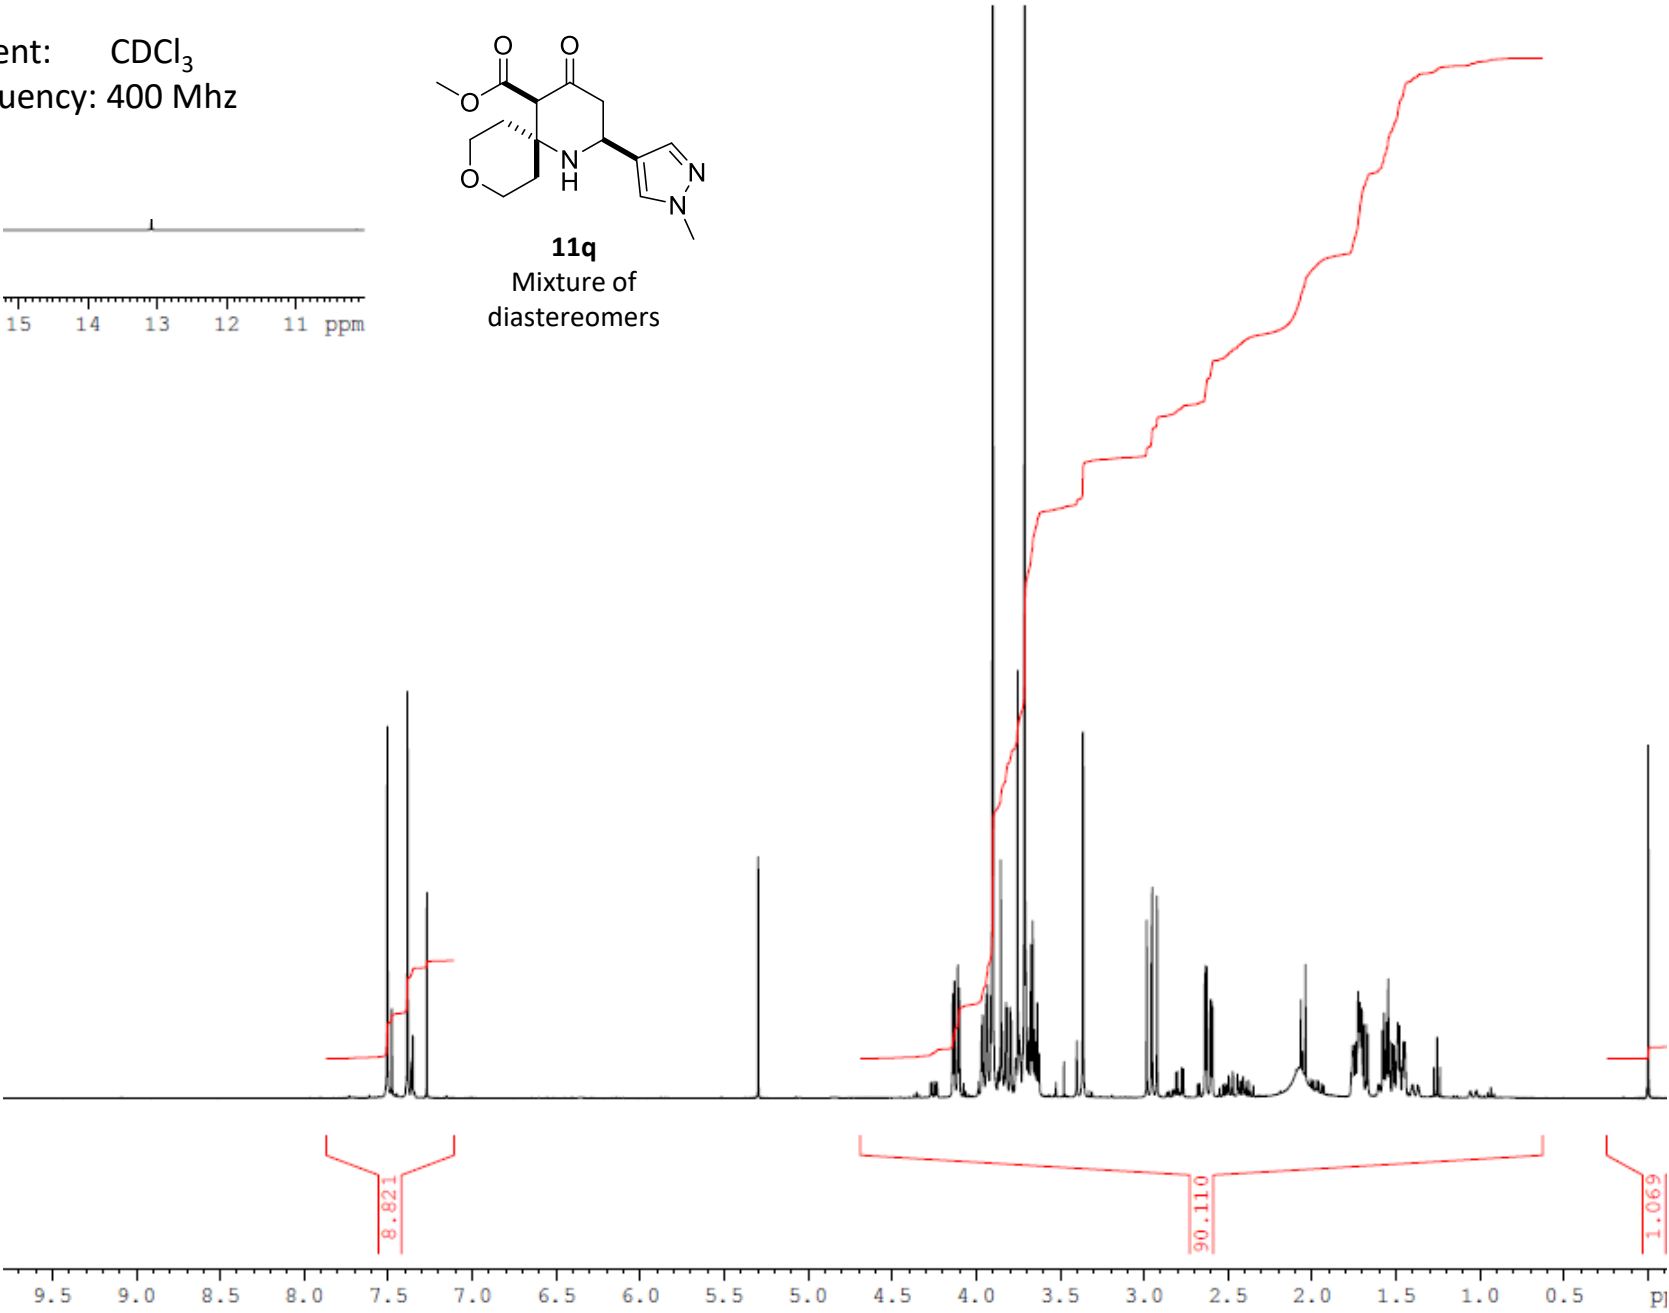

Solvent: CDCl<sub>3</sub>  
Frequency: 101 Mhz

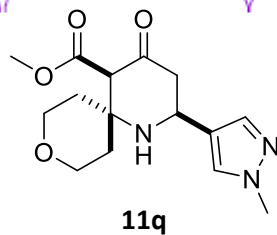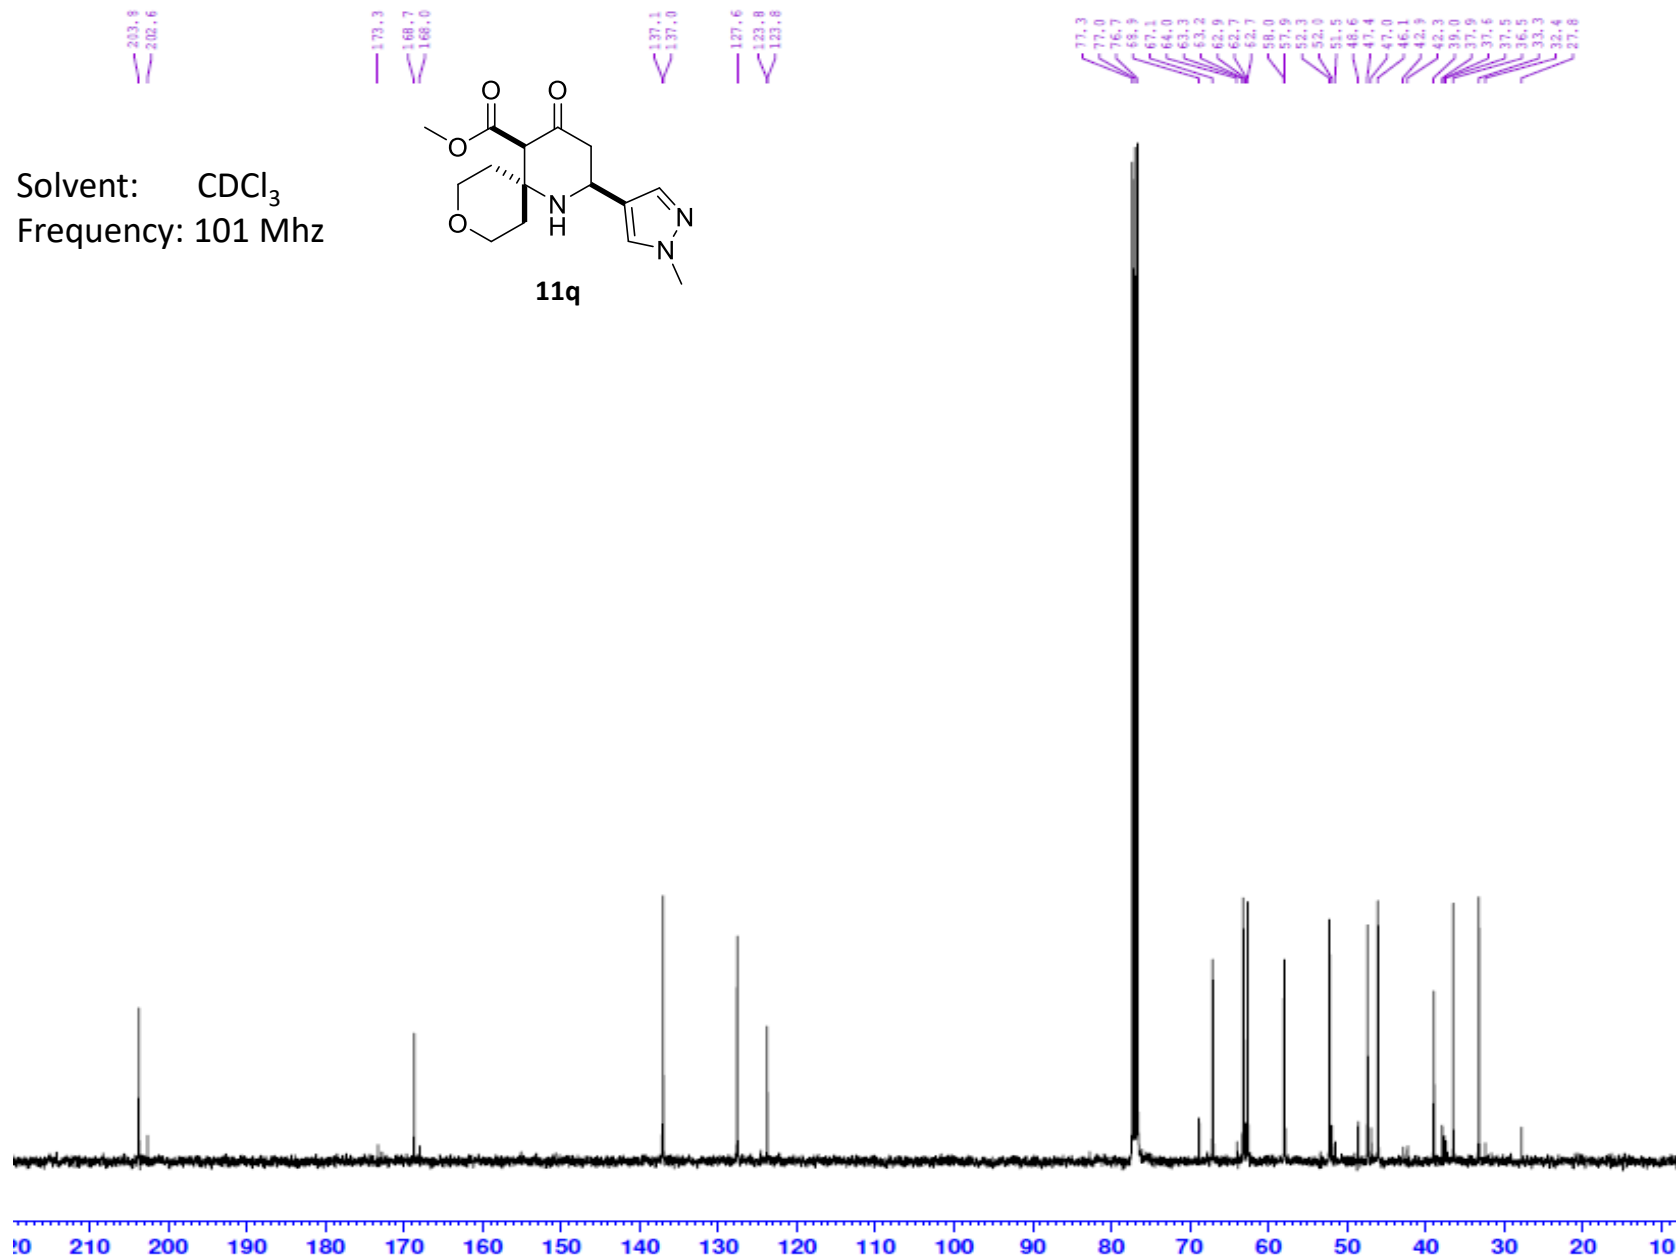

Solvent:  $\text{CDCl}_3$   
Frequency: 400 Mhz

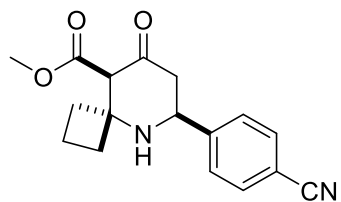

**11r**  
Two-step  
Mixture of  
diastereomers

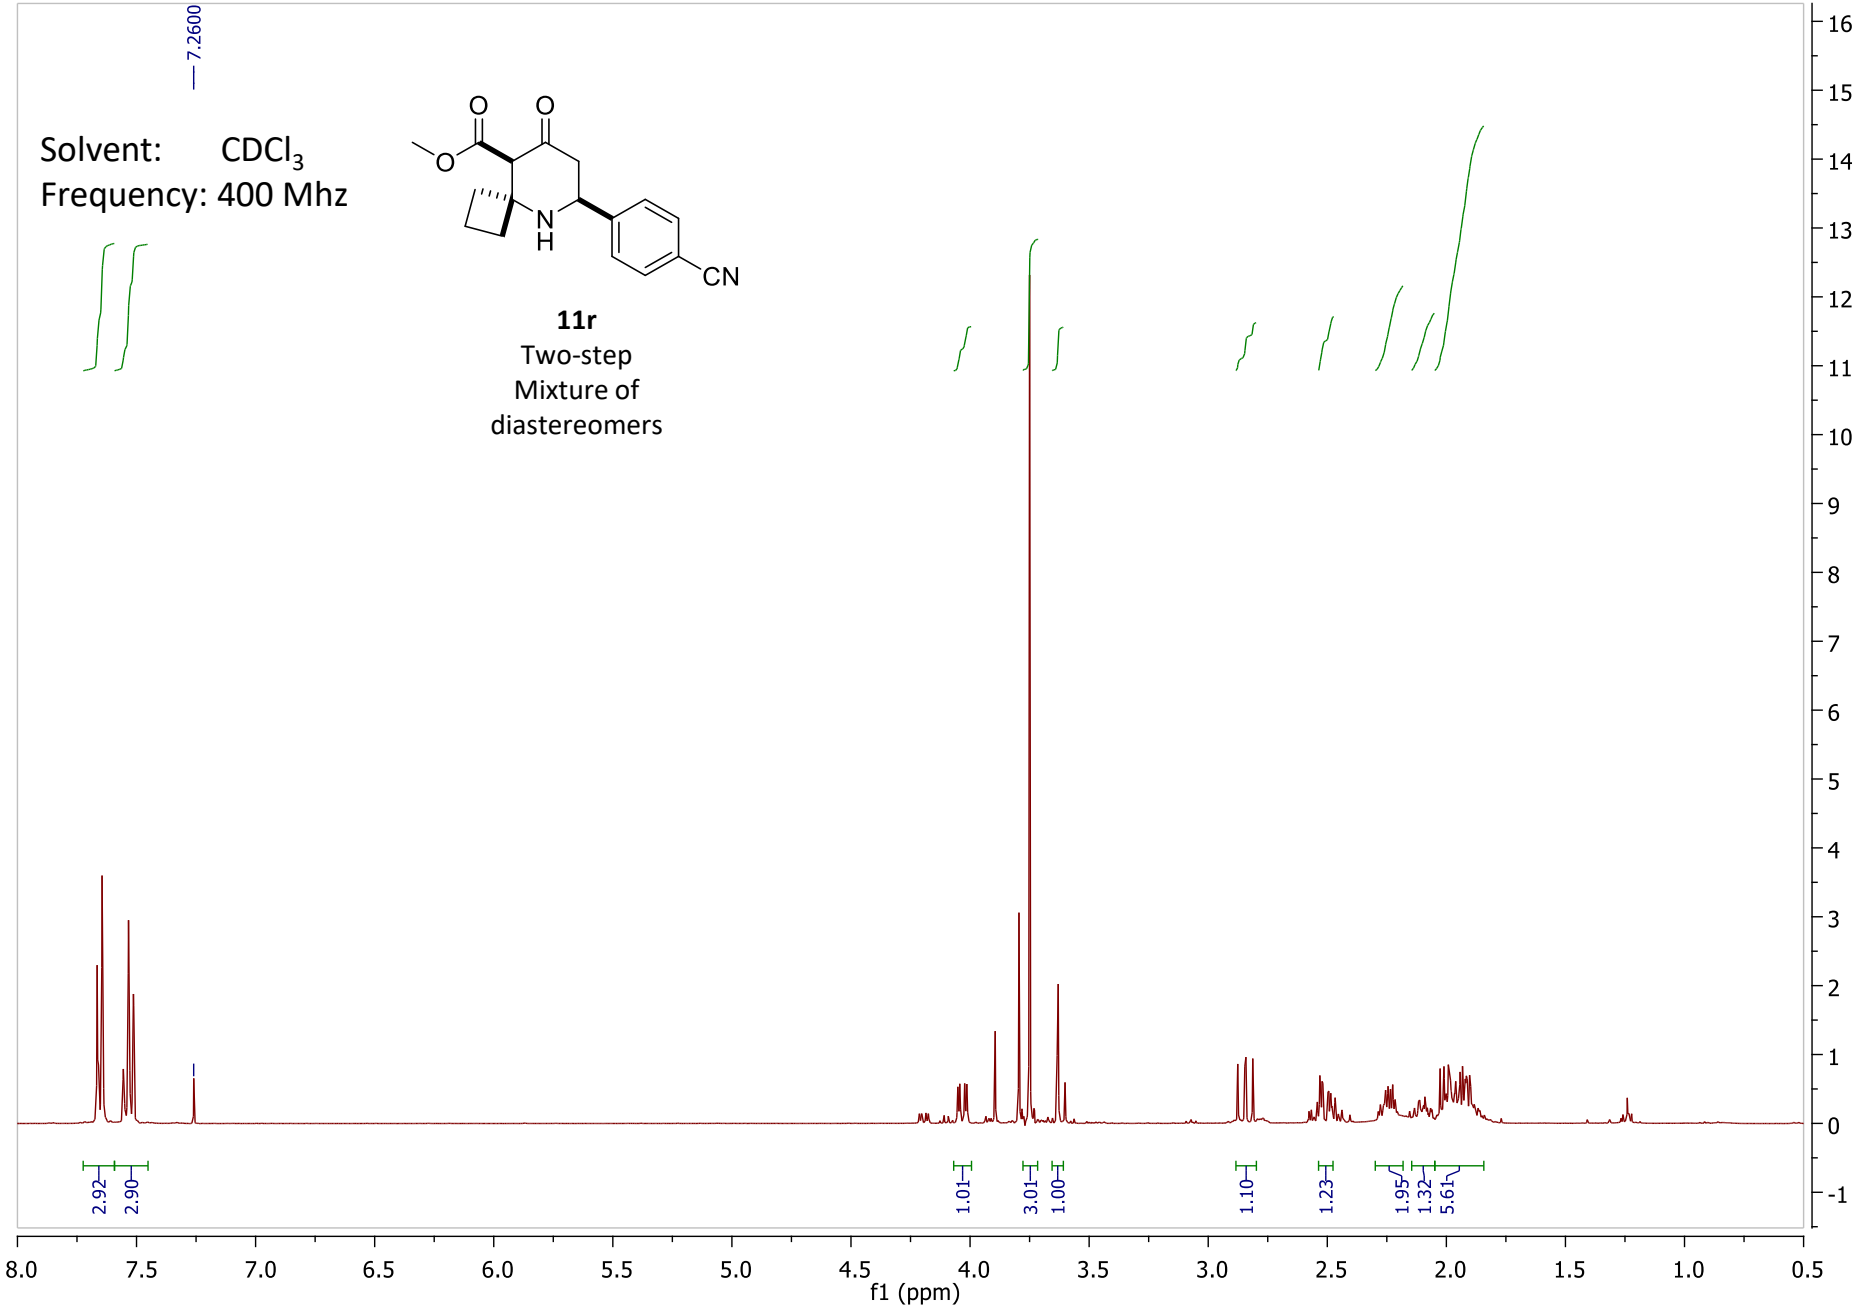

Solvent:  $\text{CDCl}_3$   
Frequency: 400 Mhz

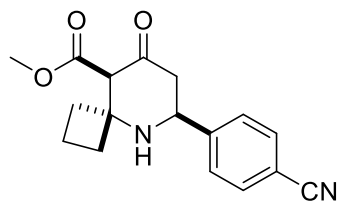

**11r**  
One-pot  
Mixture of  
diastereomers

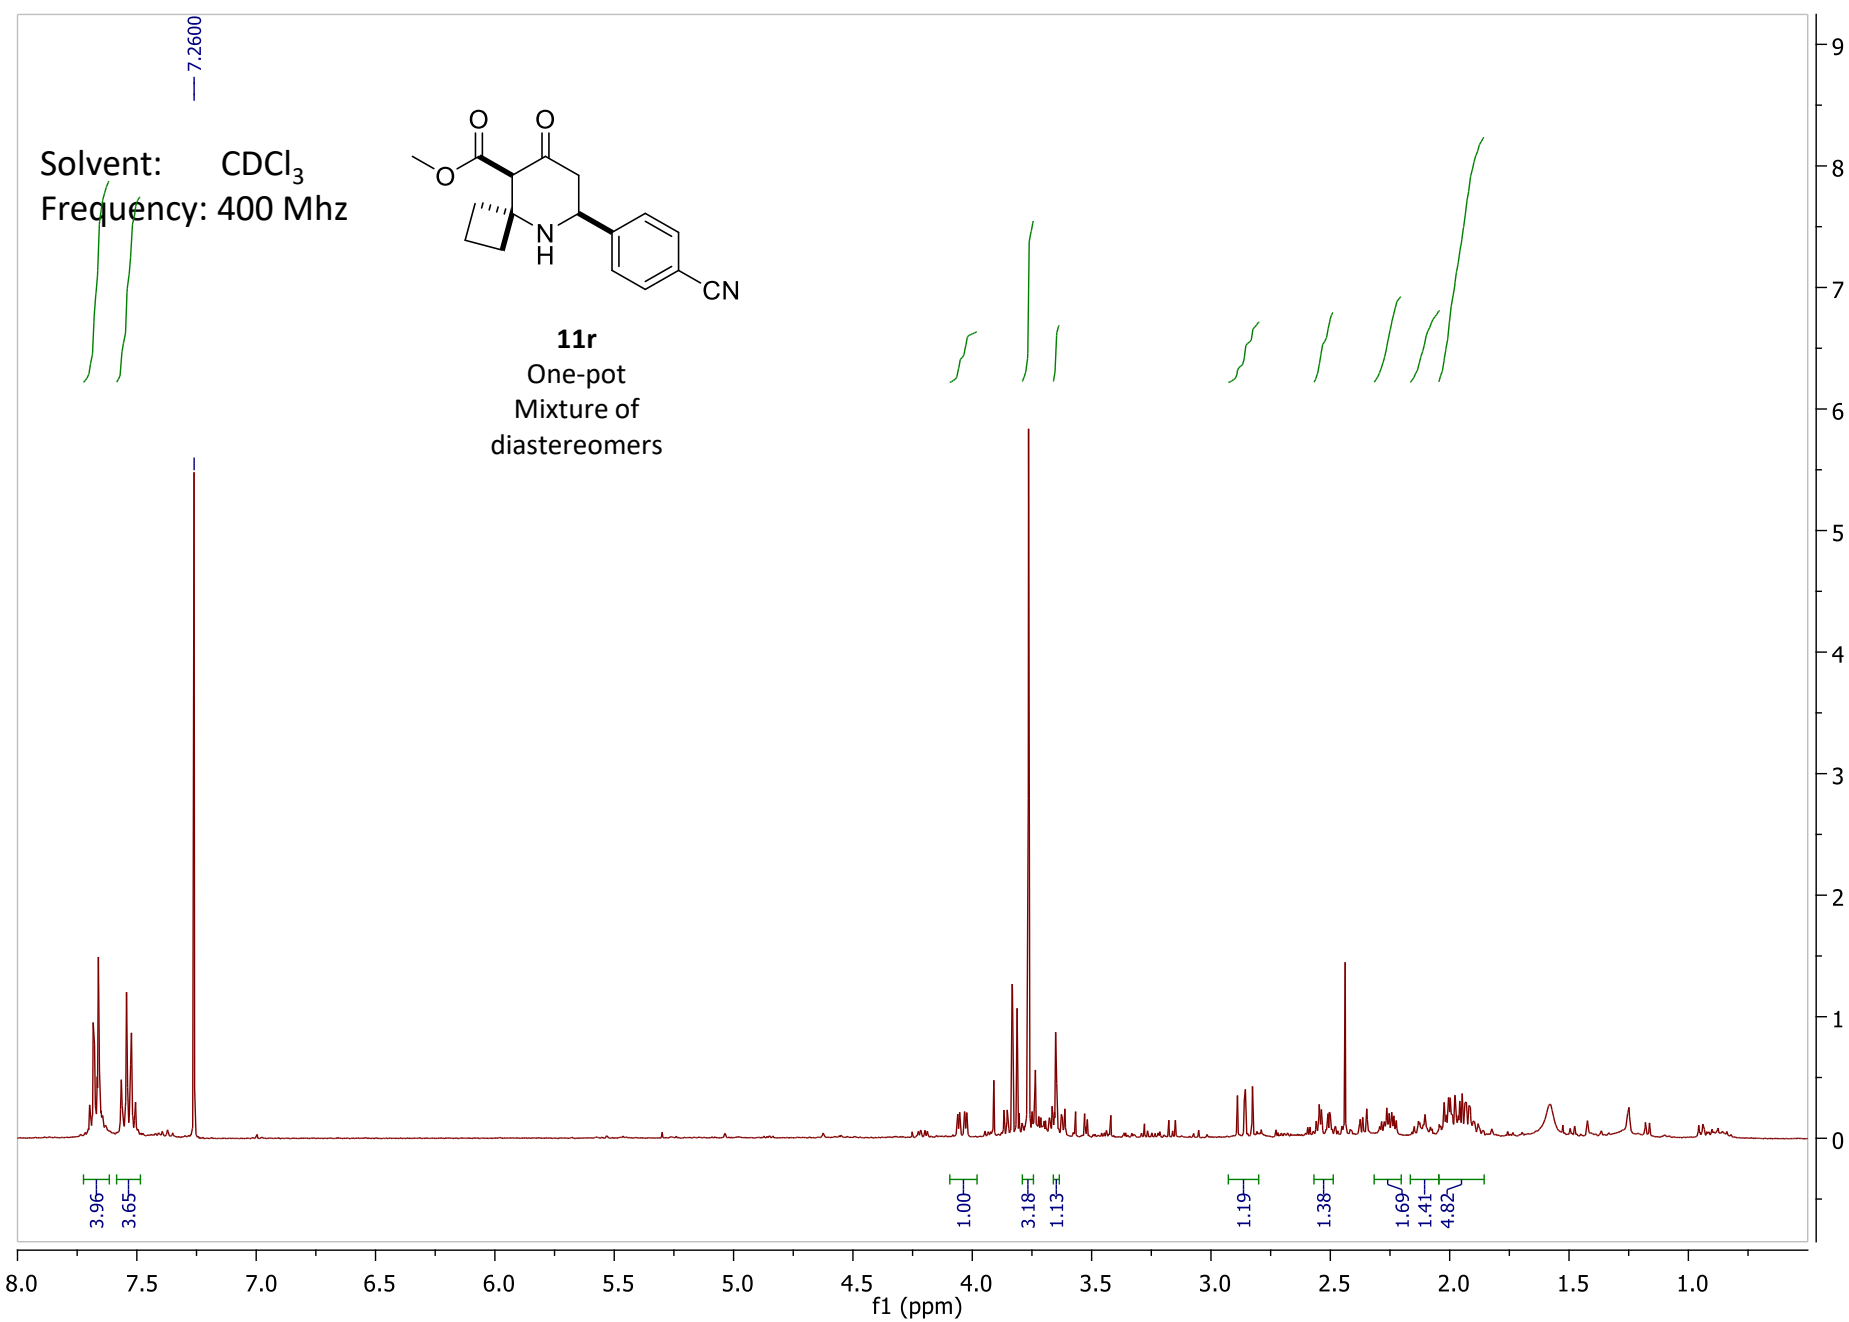



Solvent:  $\text{CDCl}_3$   
Frequency: 101 Mhz

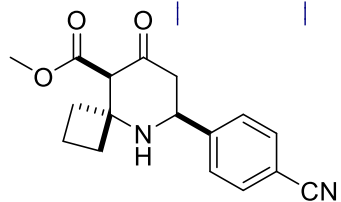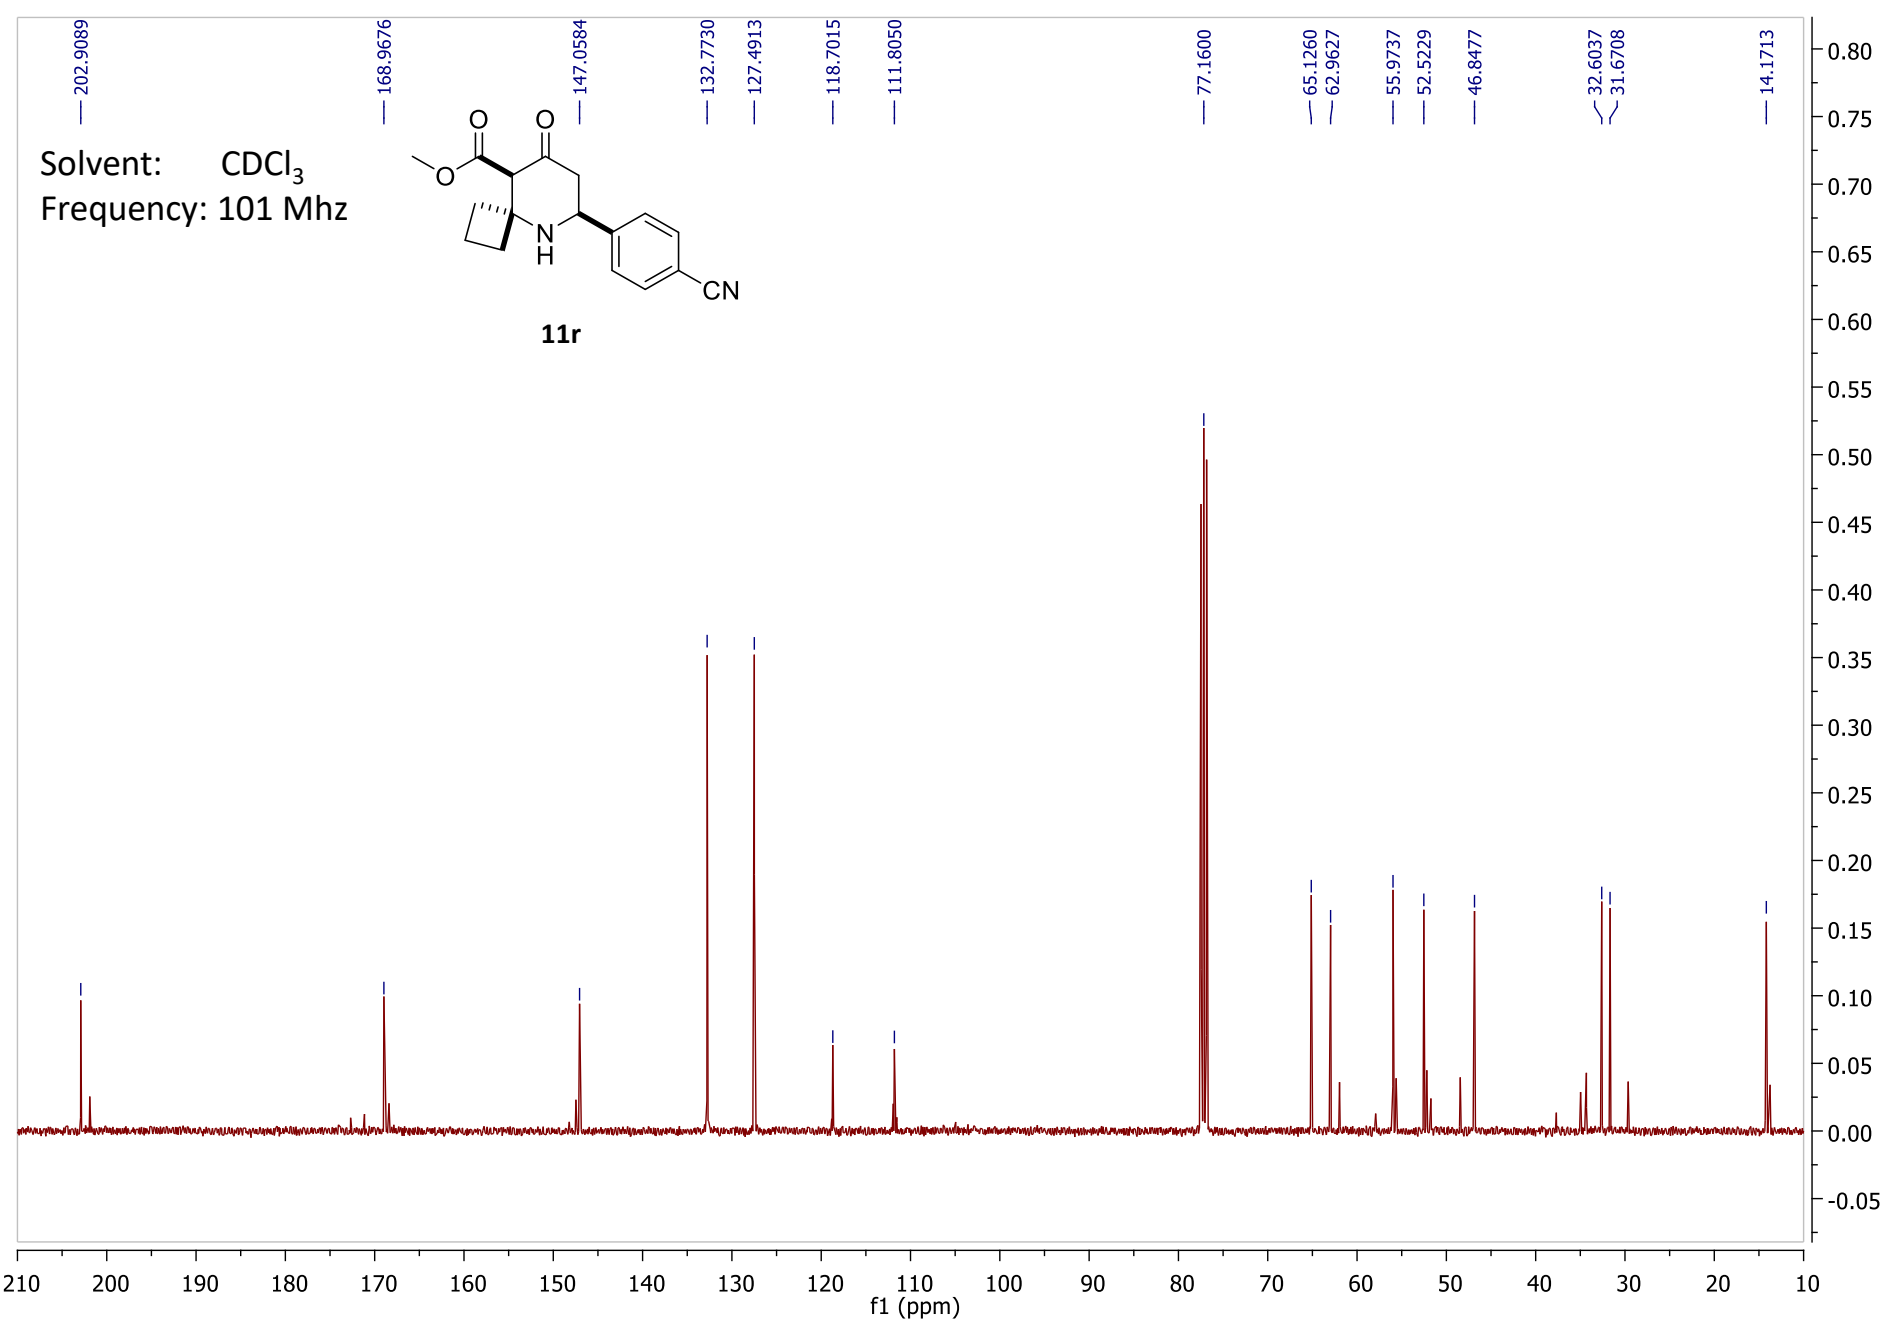

Solvent:  $\text{CDCl}_3$   
Frequency: 400 Mhz

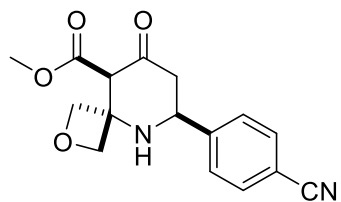

**11s**  
Mixture of  
diastereomers

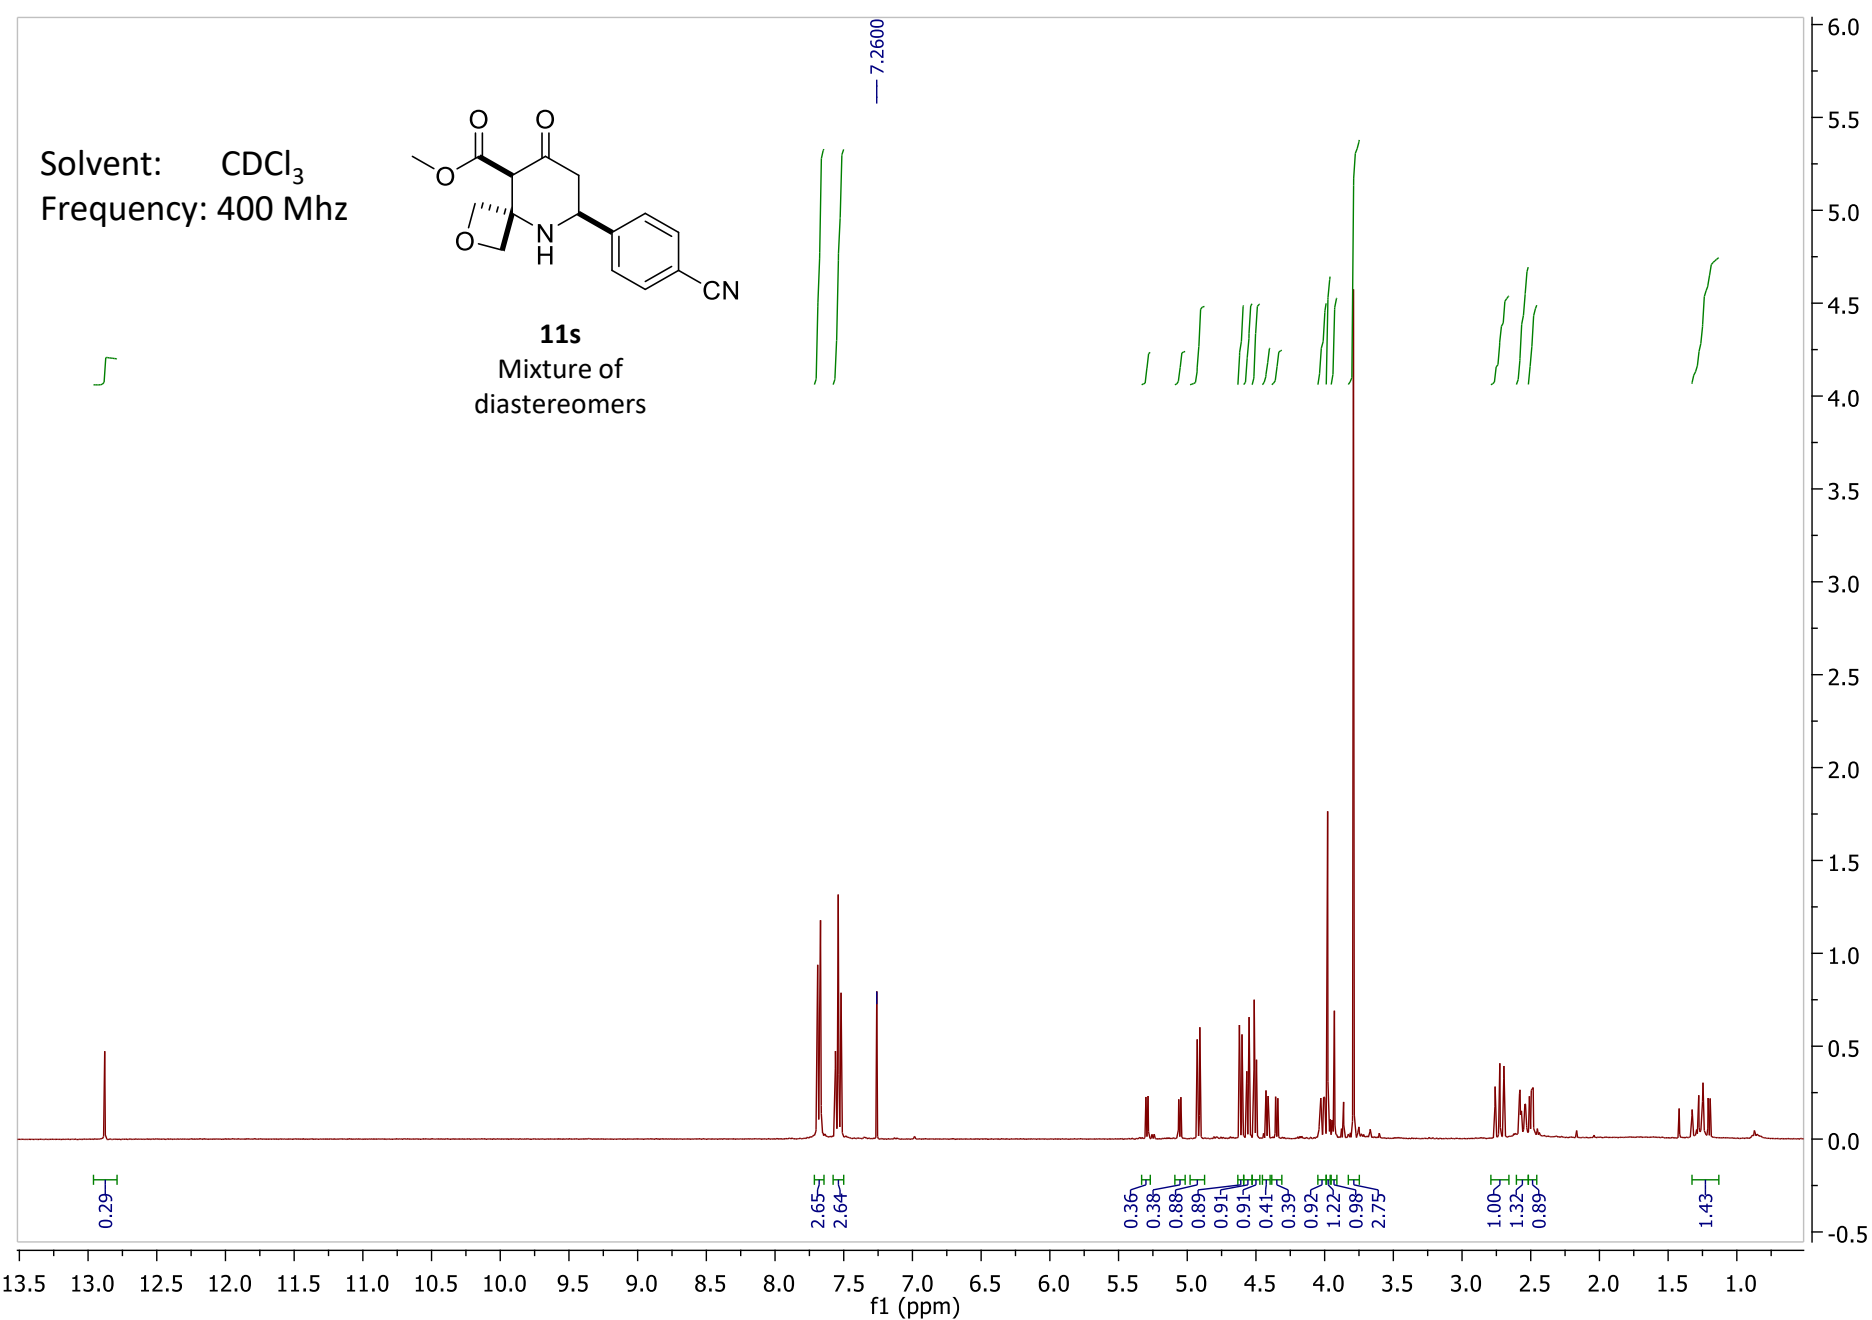

Solvent:  $\text{CDCl}_3$   
Frequency: 101 Mhz

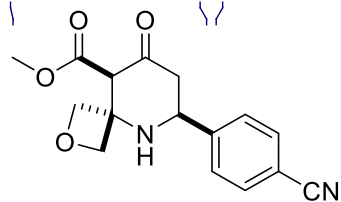

**11s**

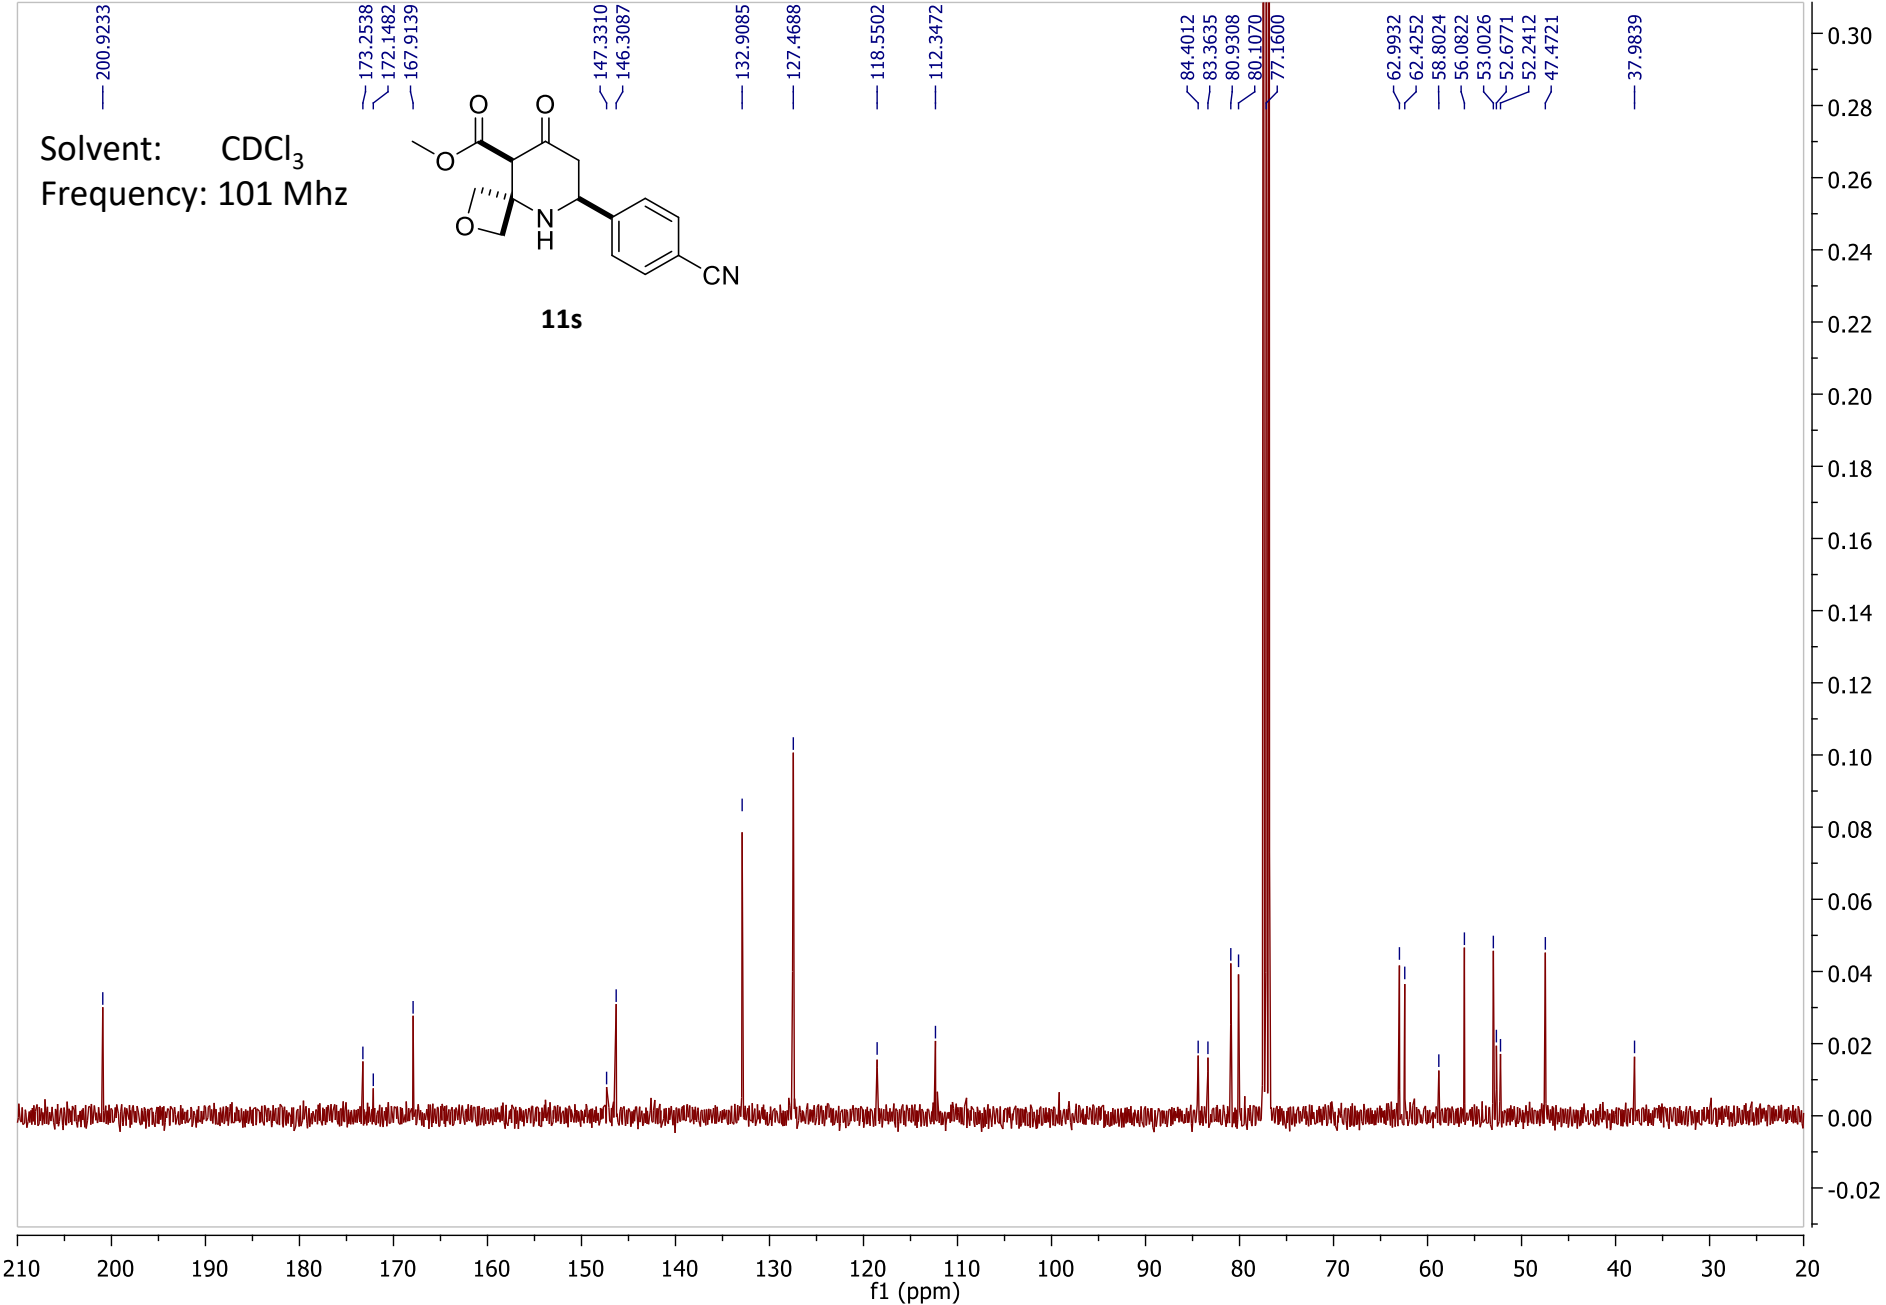

Solvent:  $\text{CDCl}_3$   
Frequency: 400 Mhz

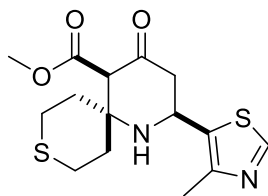

**11t**  
Mixture of  
diastereomers

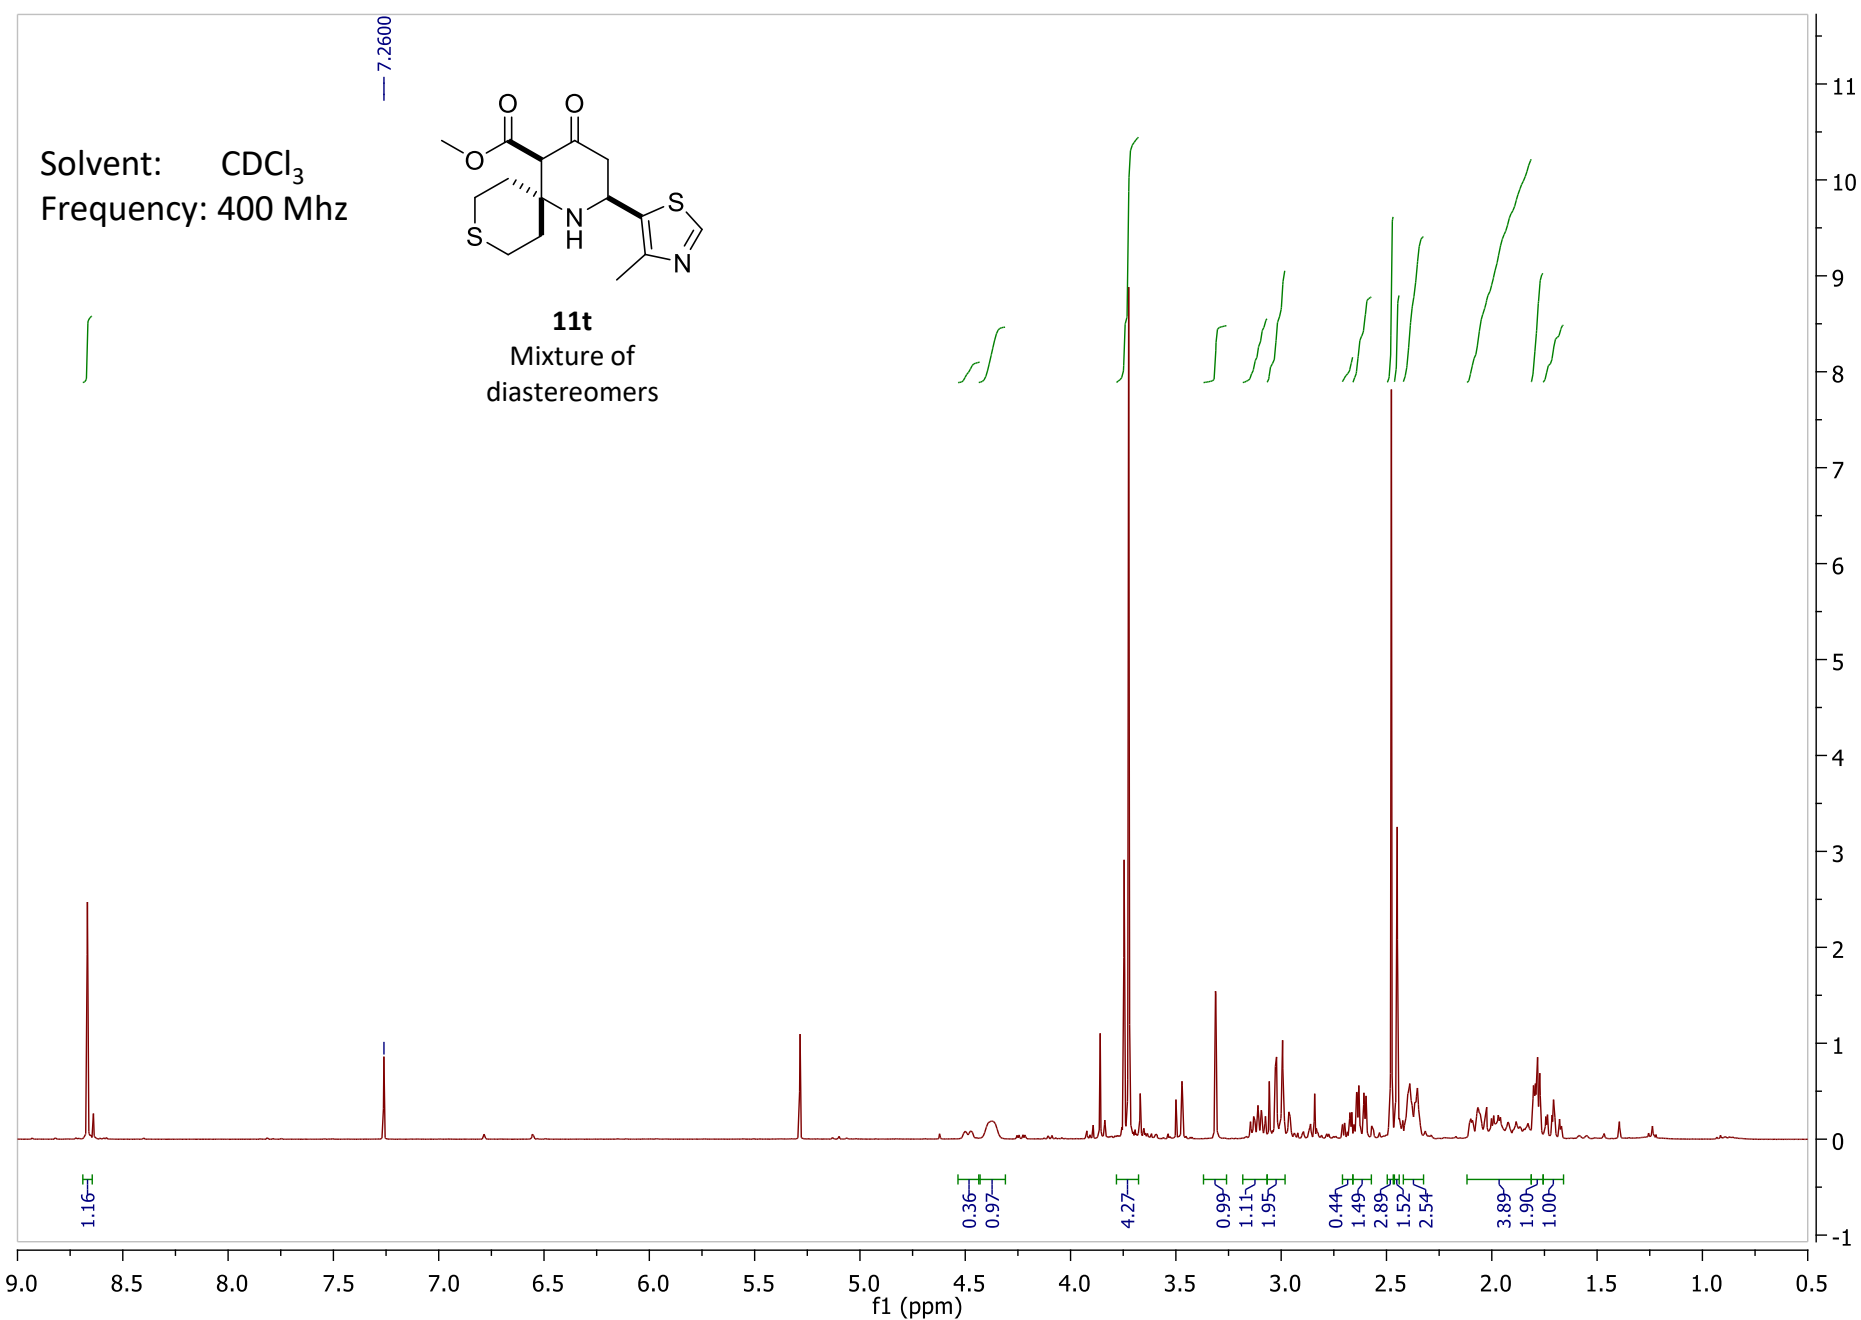

Solvent:  $\text{CDCl}_3$   
Frequency: 101 Mhz

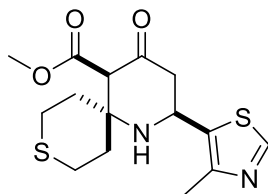

**11t**

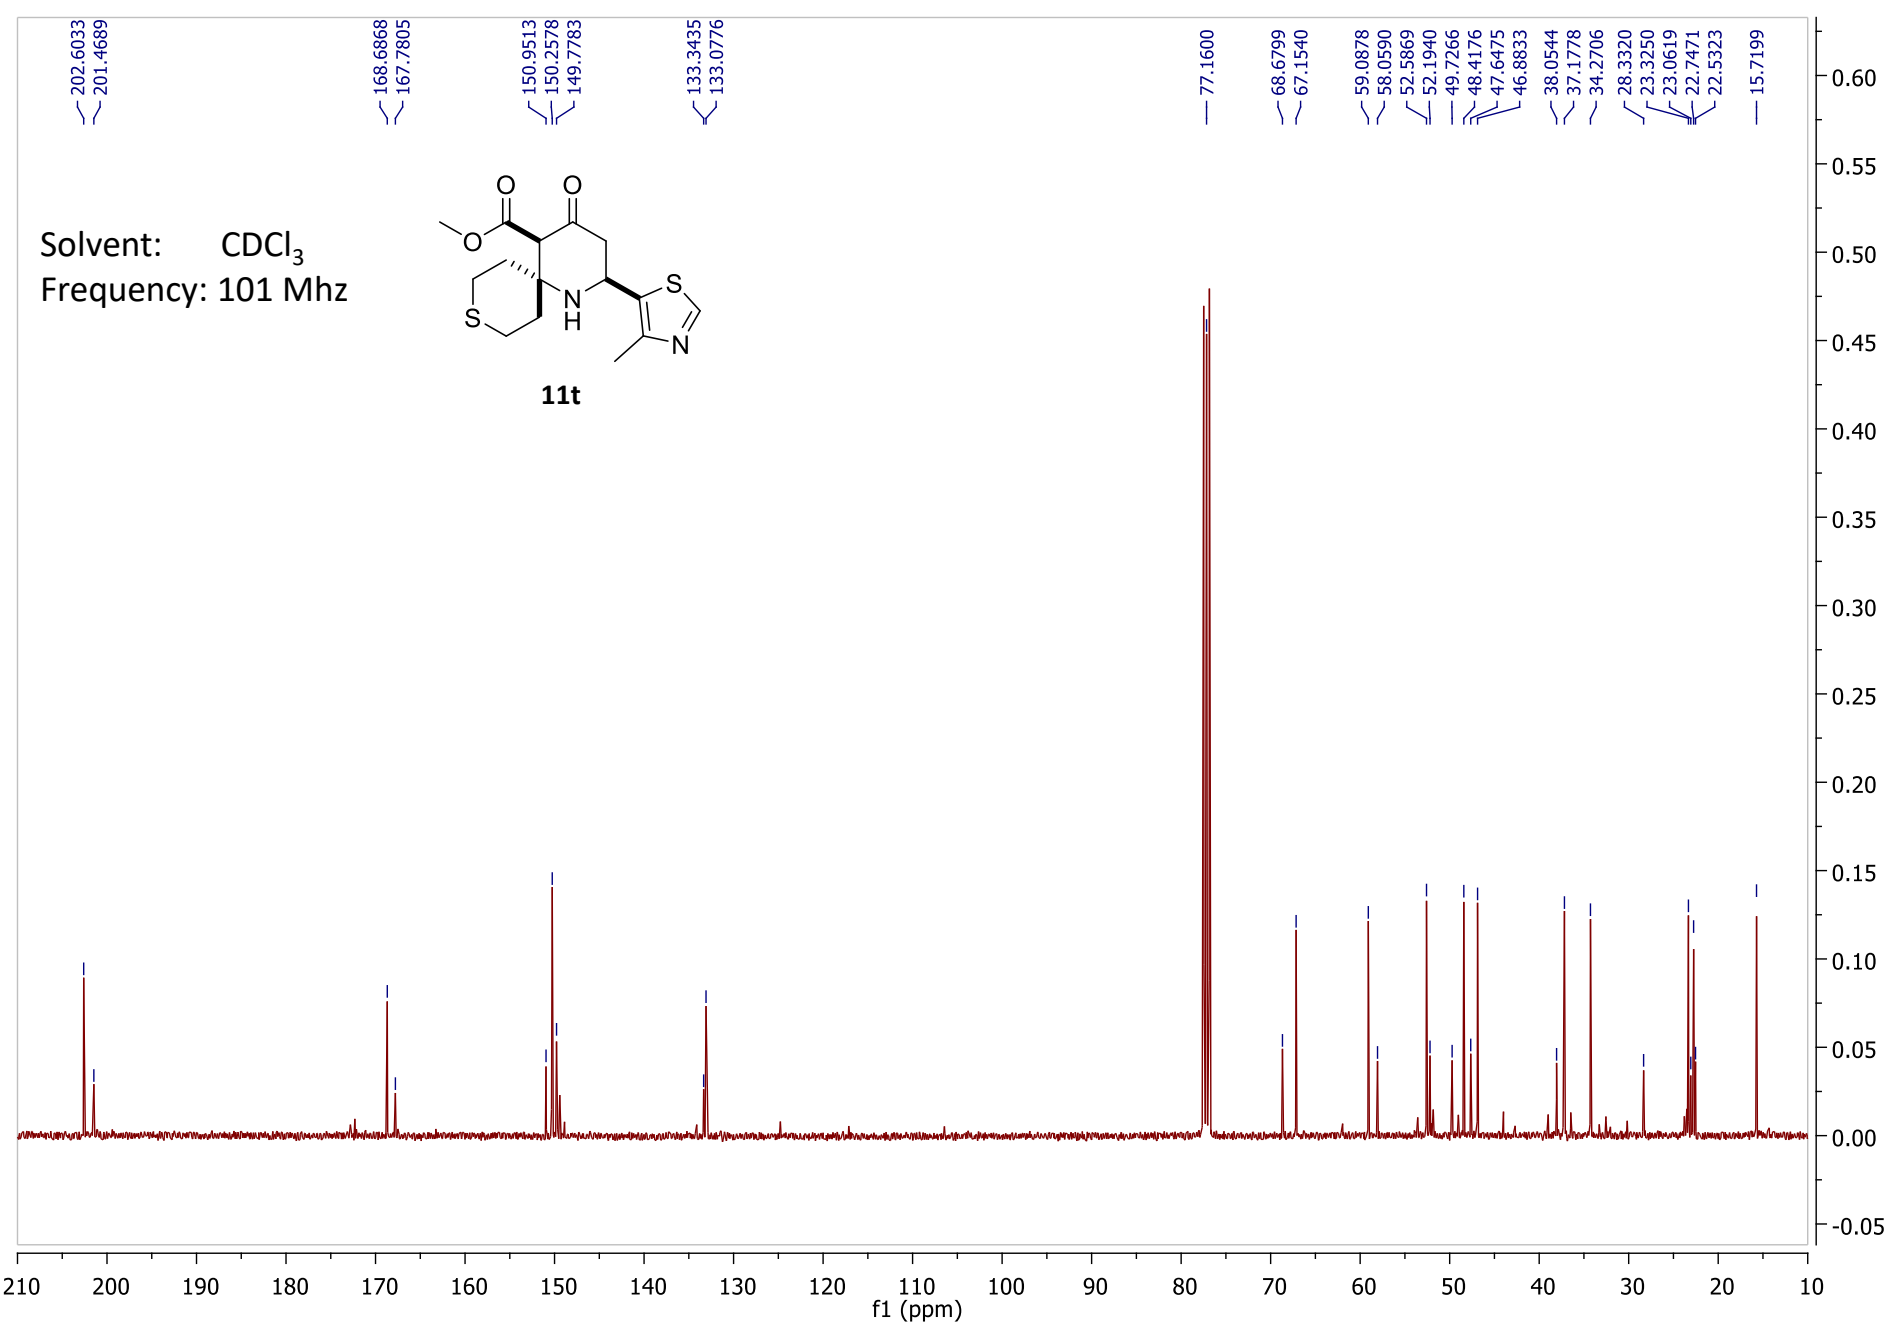

Solvent: CDCl<sub>3</sub>  
Frequency: 400 Mhz

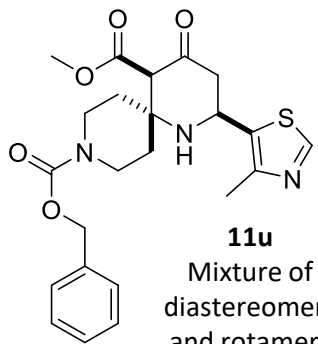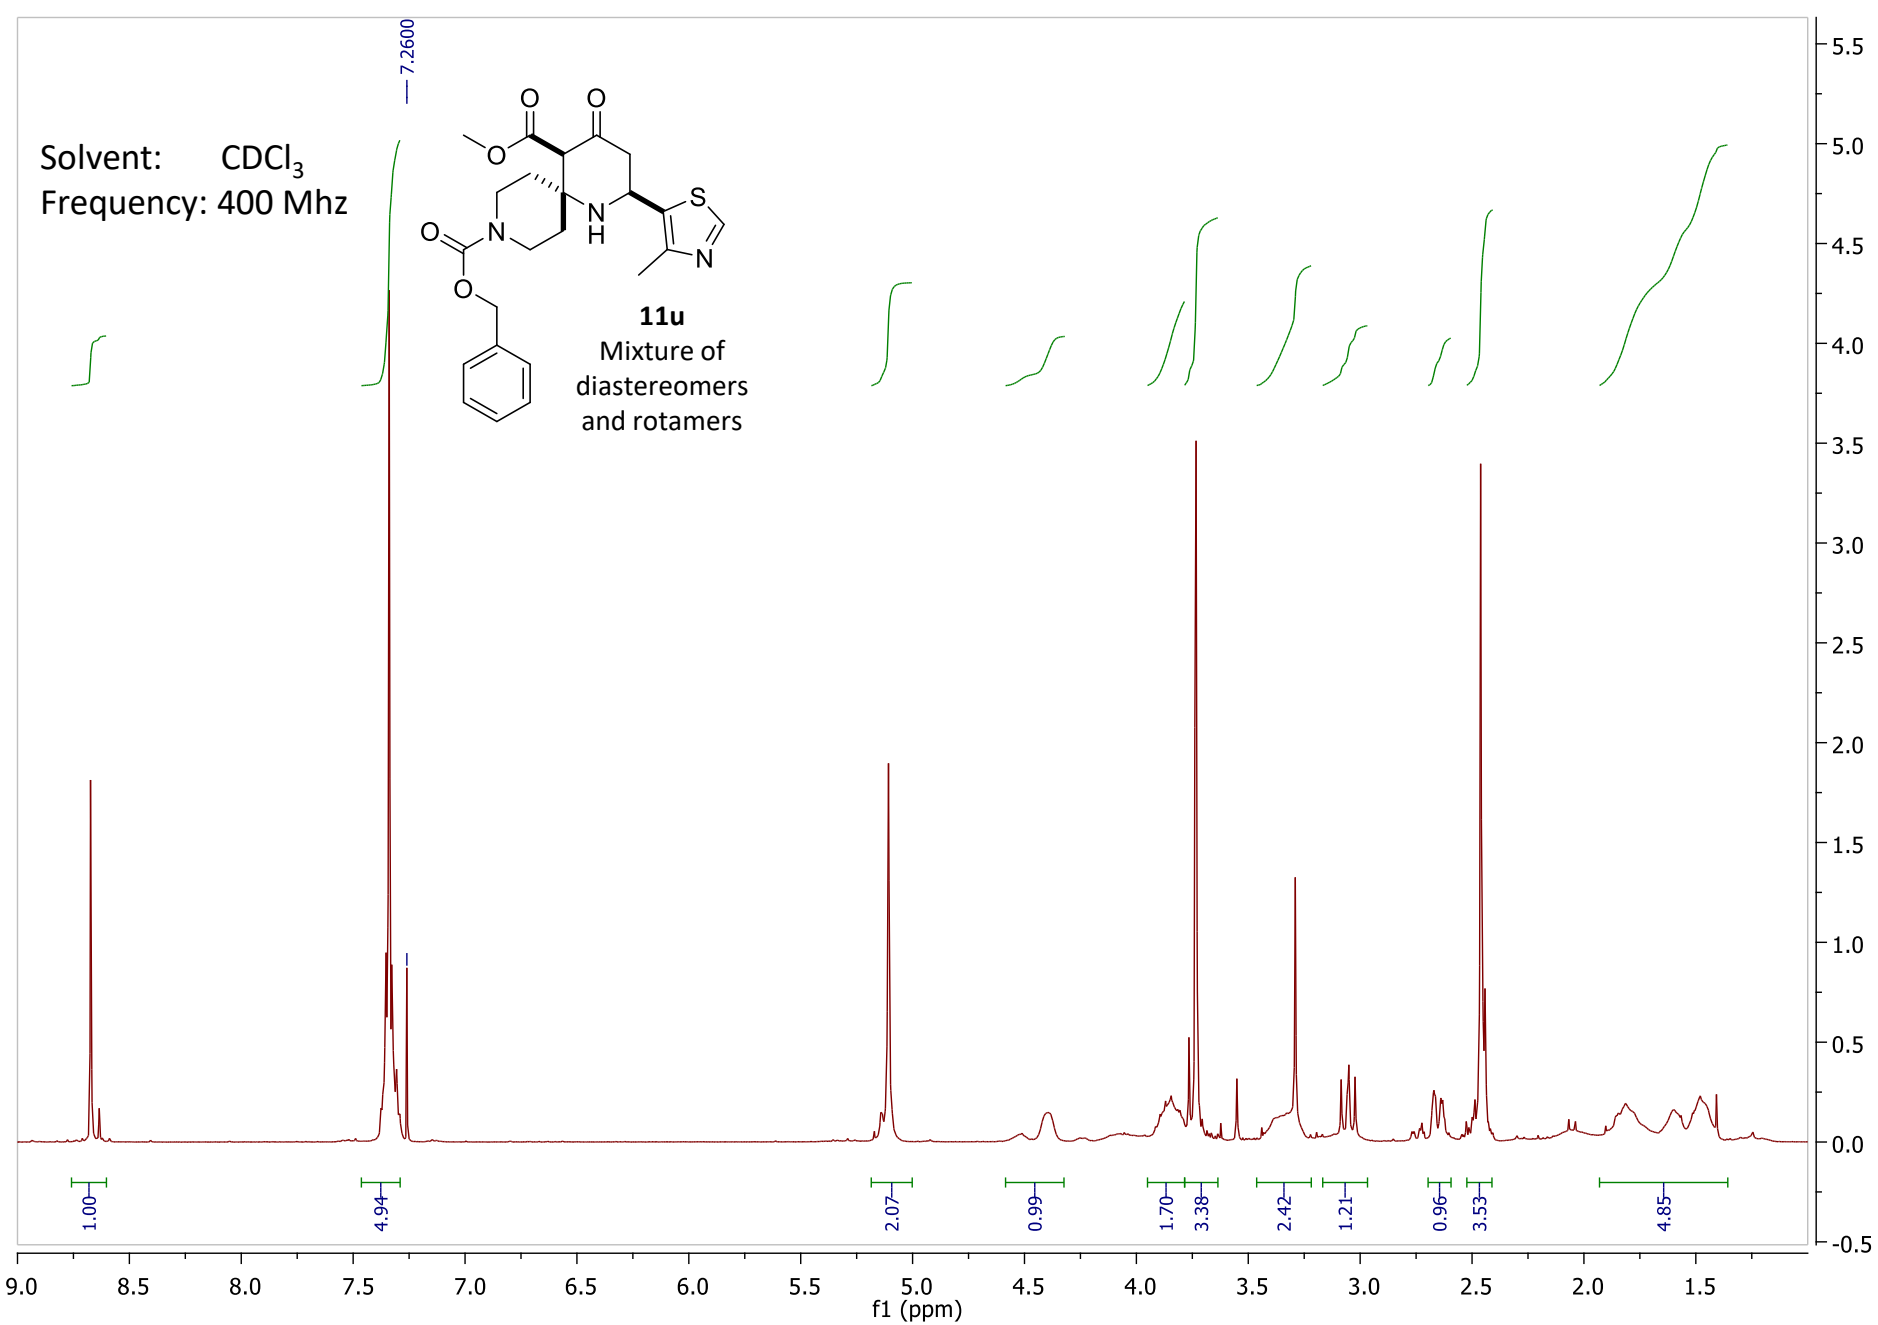

Solvent: CDCl<sub>3</sub>  
Frequency: 101 Mhz

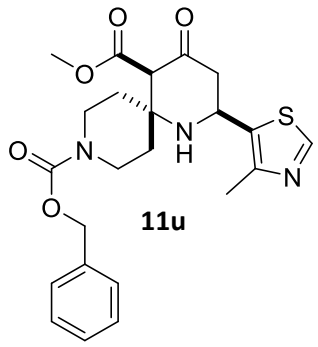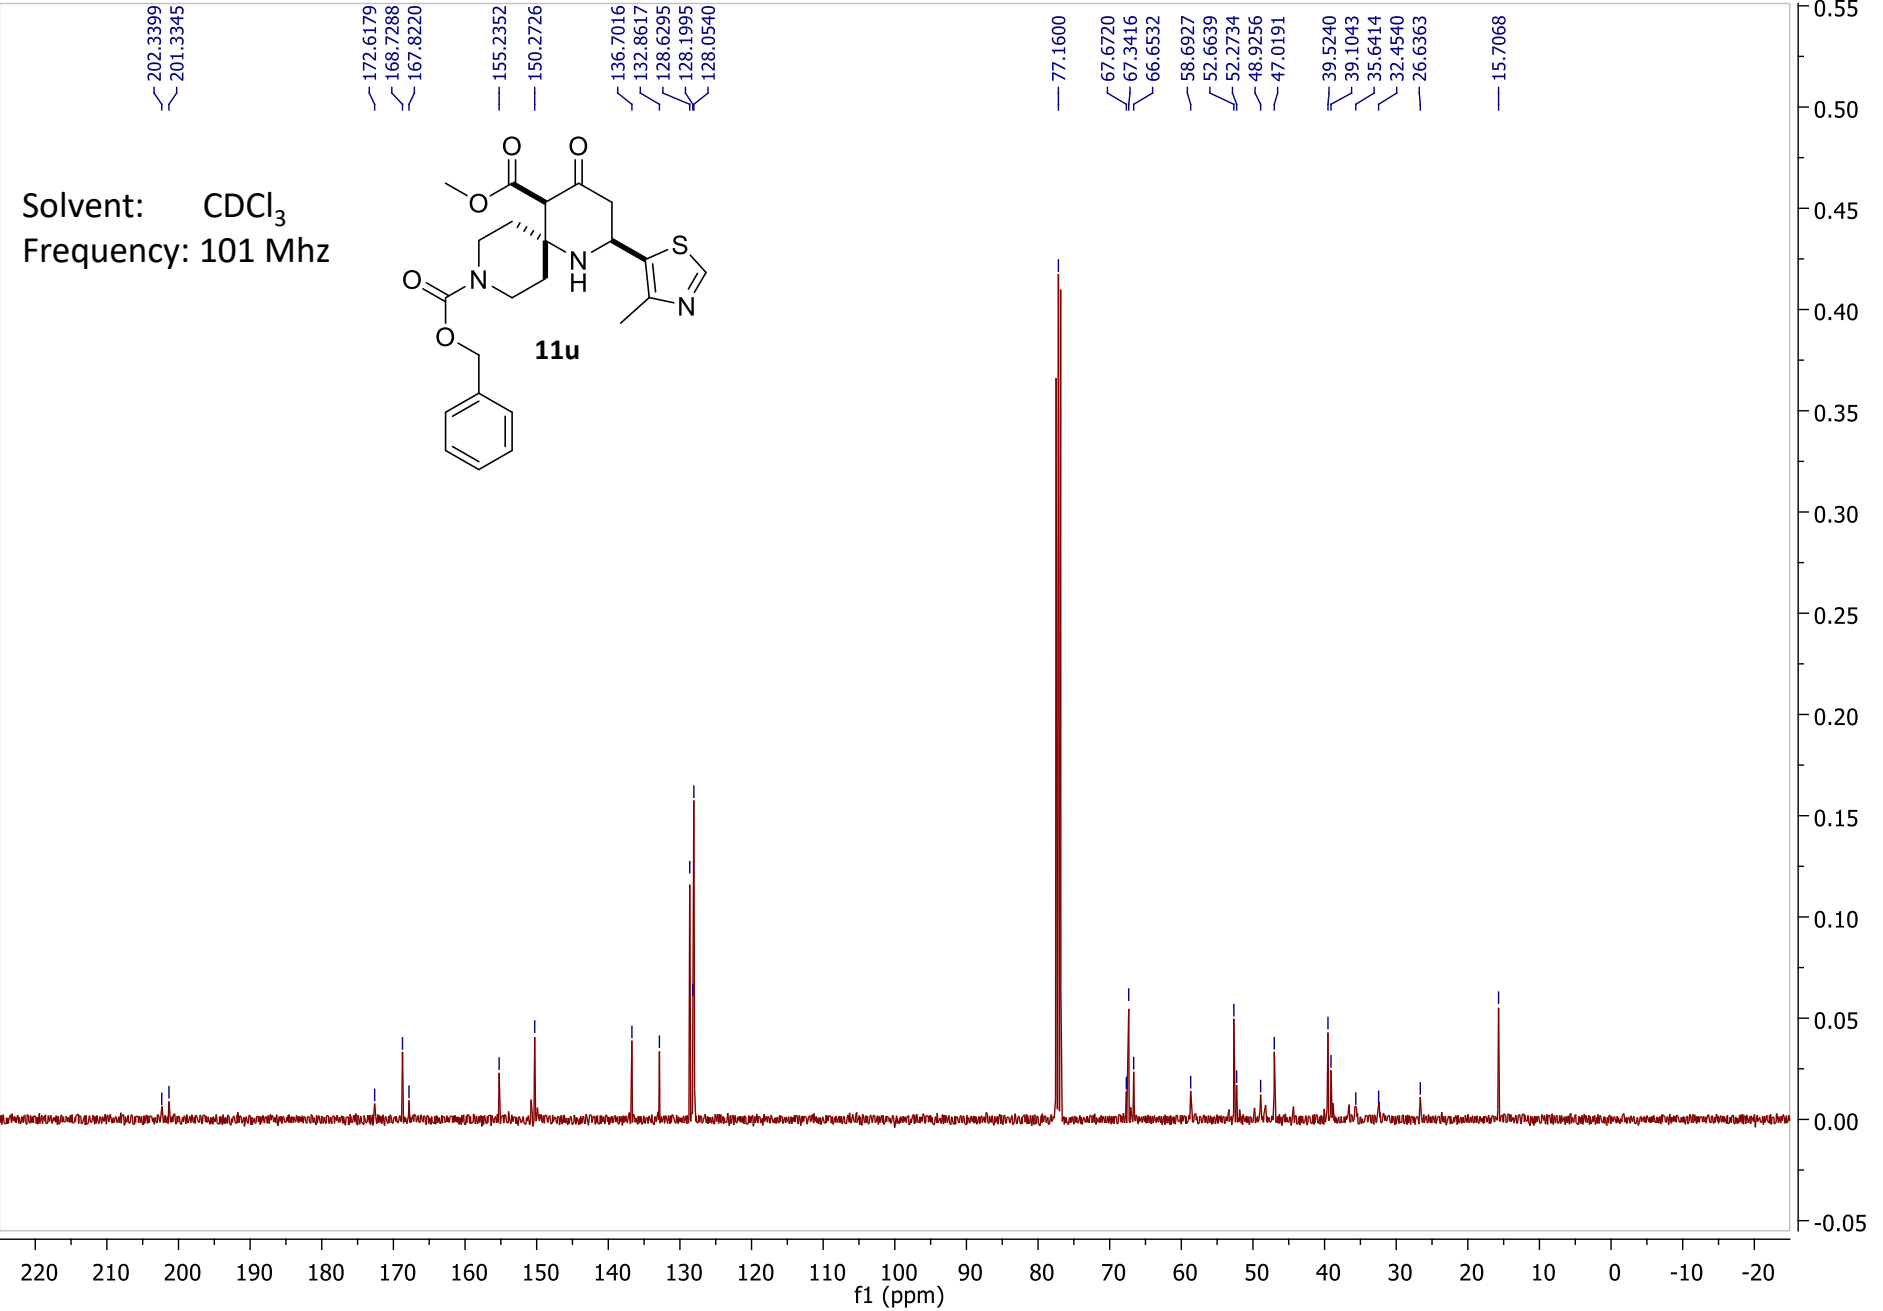

Solvent: CDCl<sub>3</sub>  
Frequency: 400 Mhz

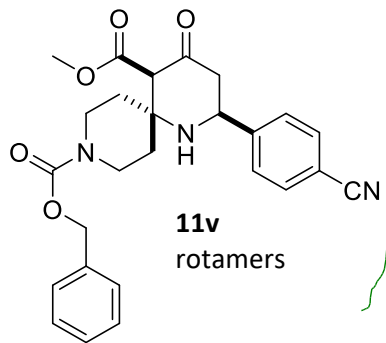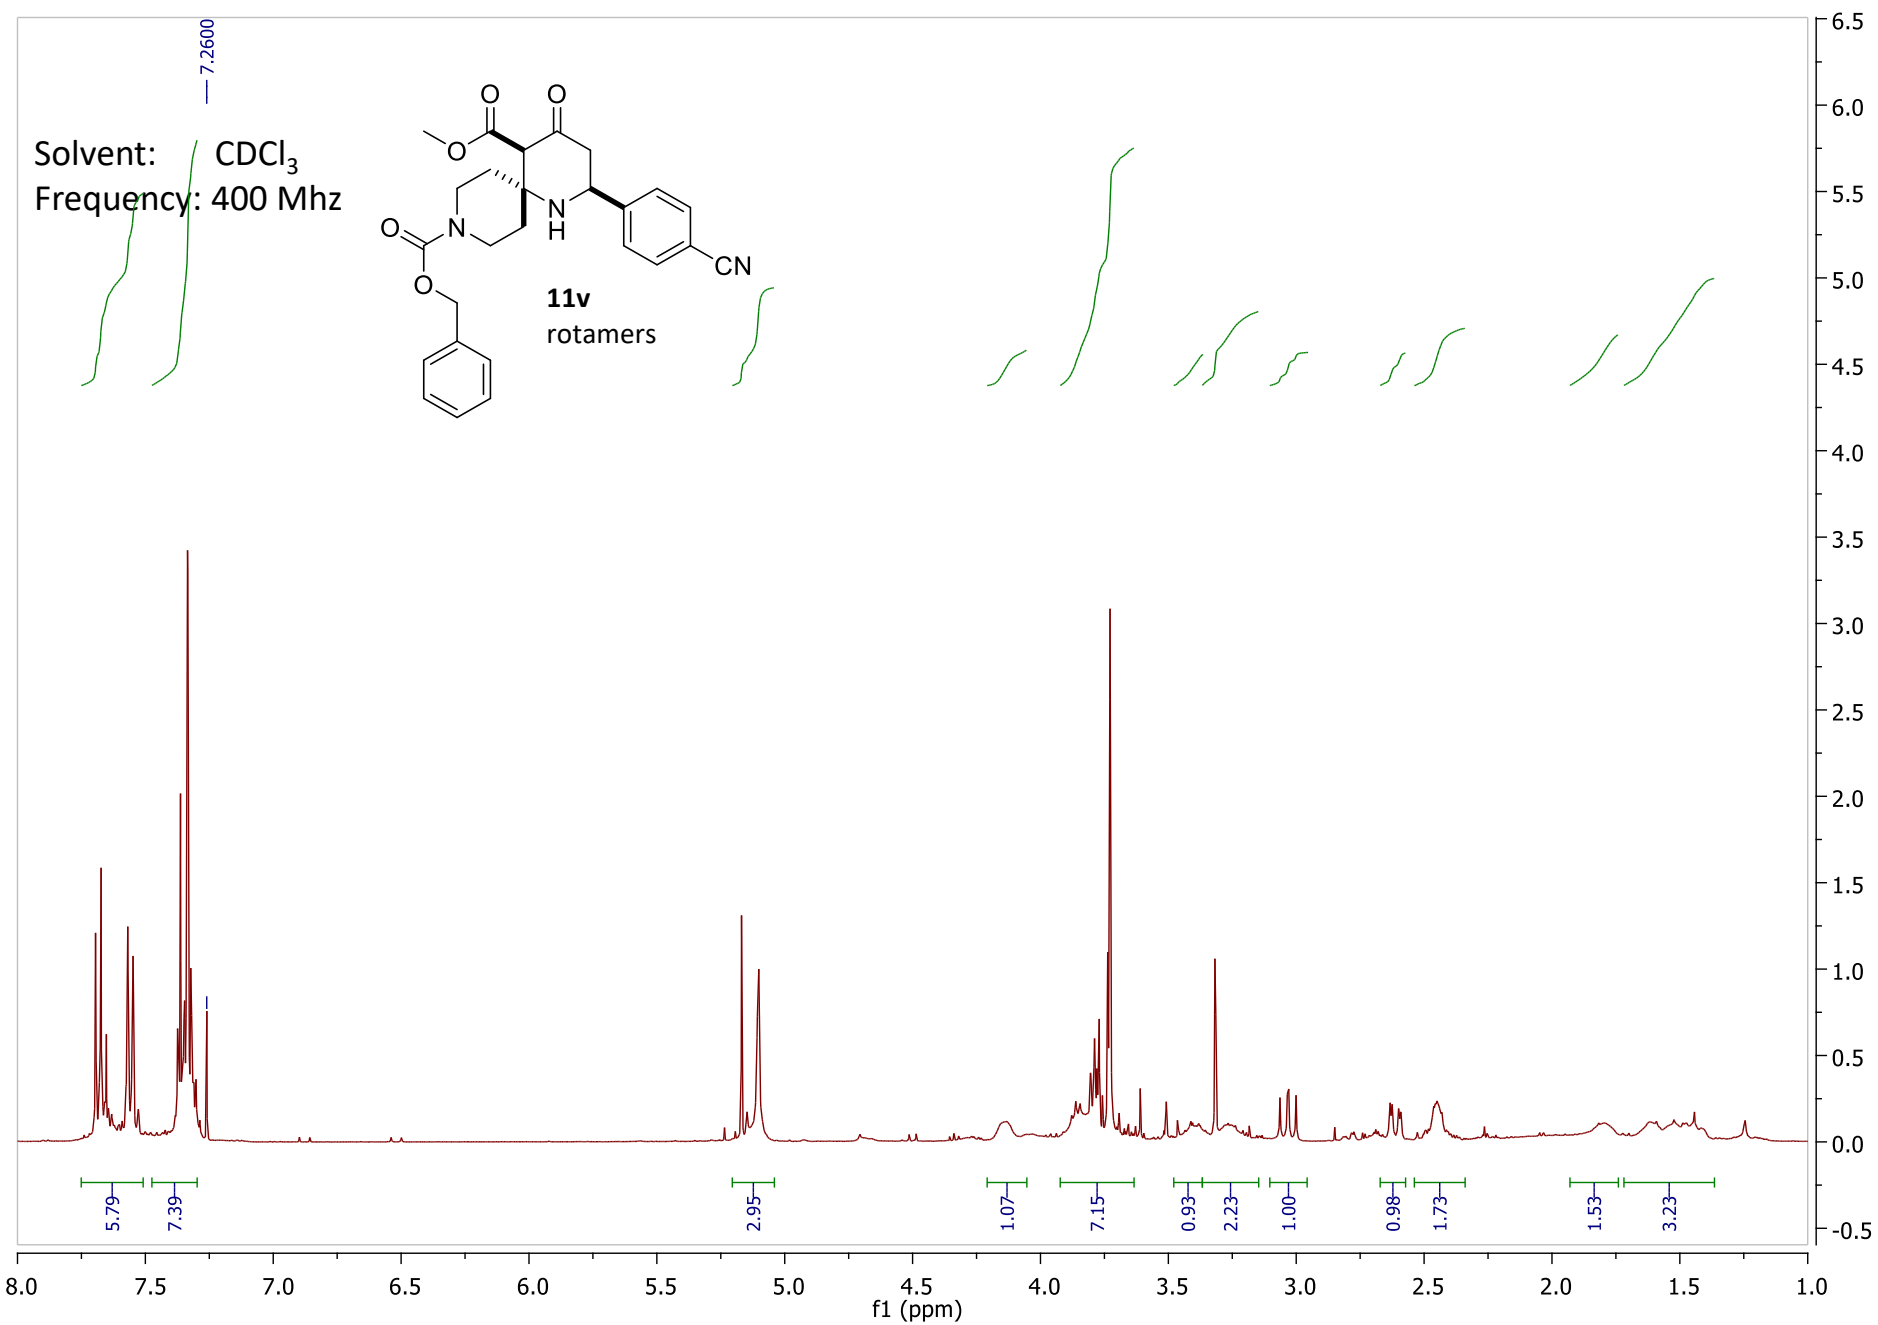



Solvent:  $\text{CDCl}_3$   
Frequency: 101 Mhz

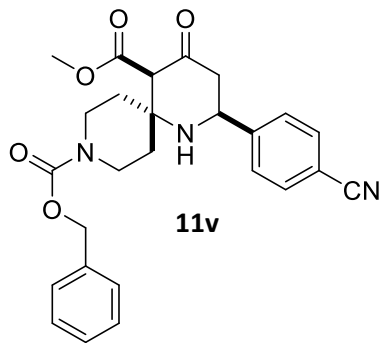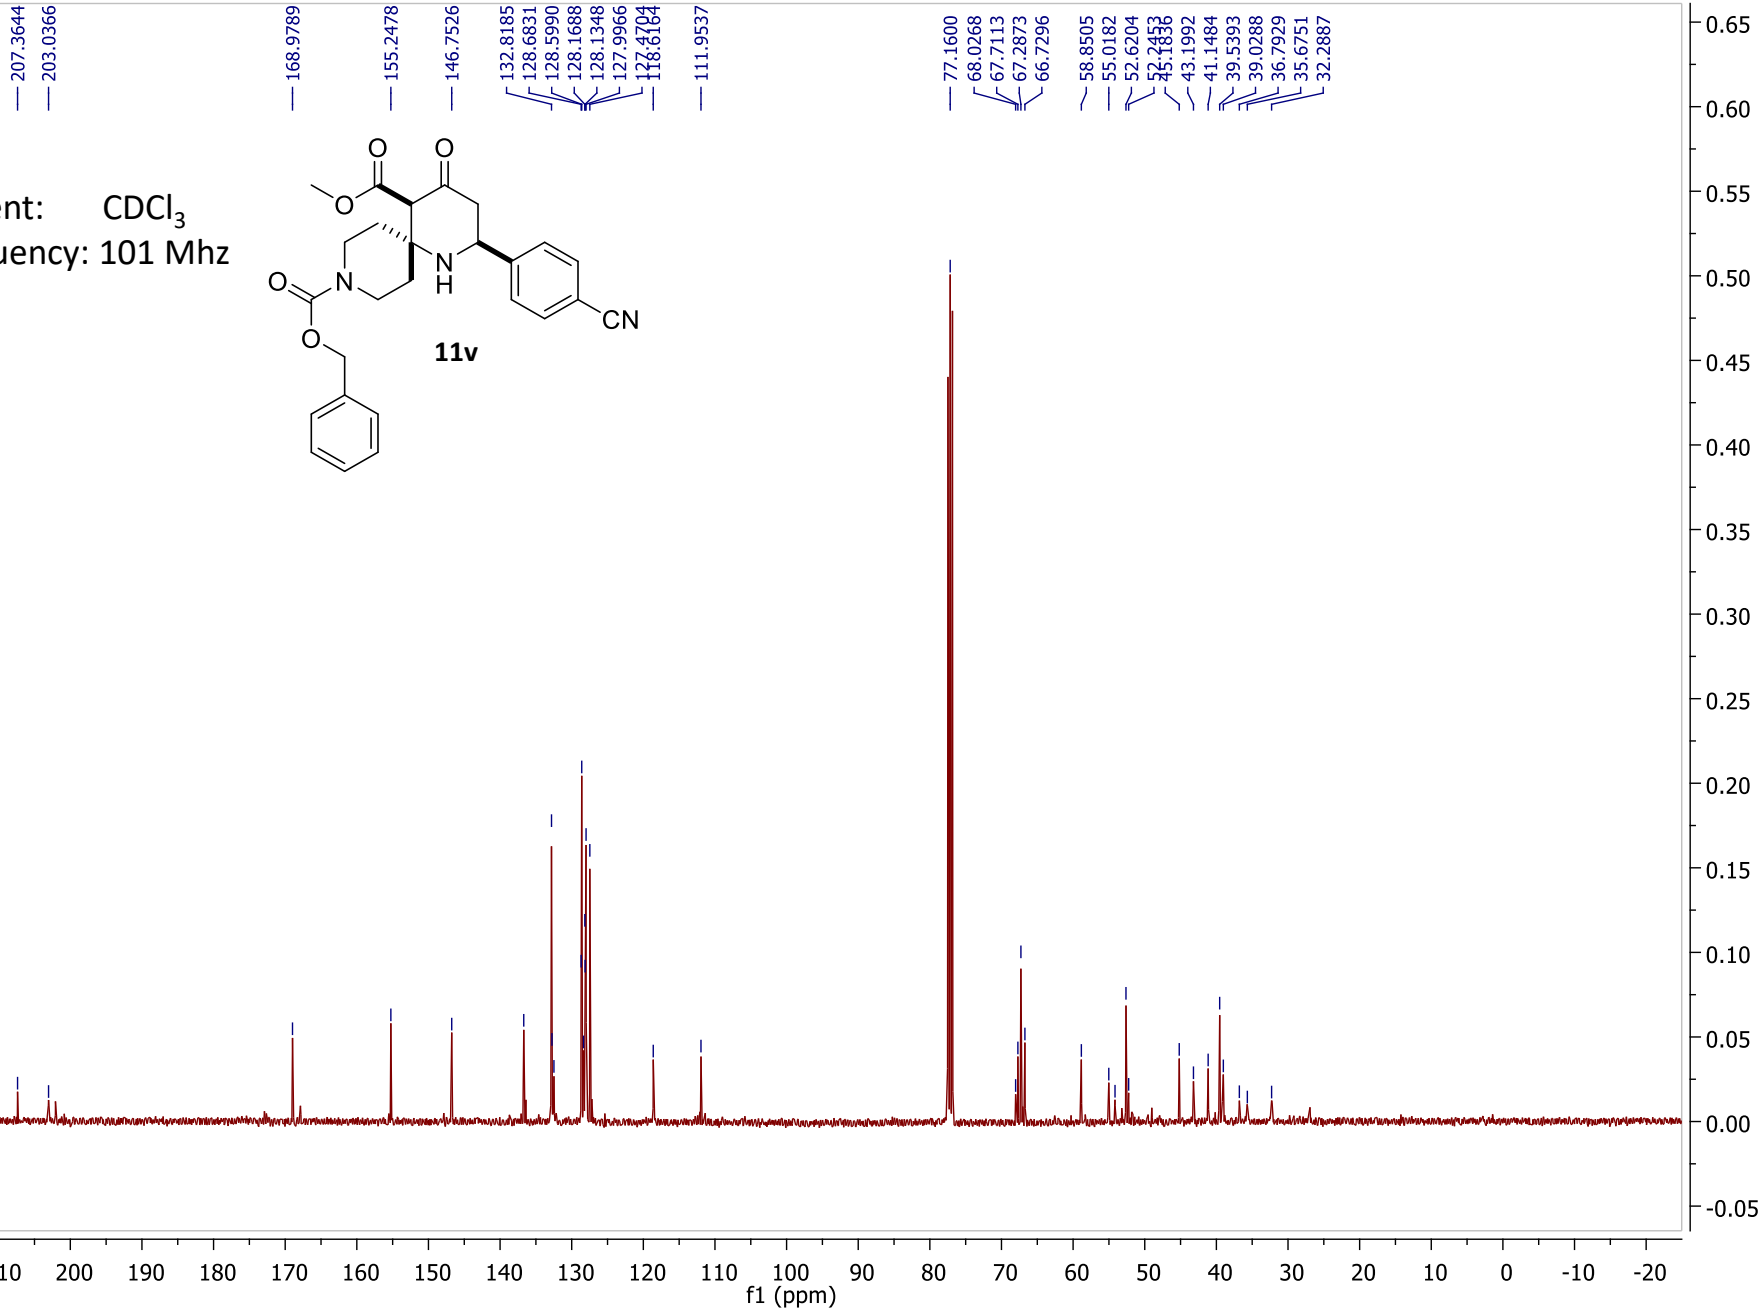

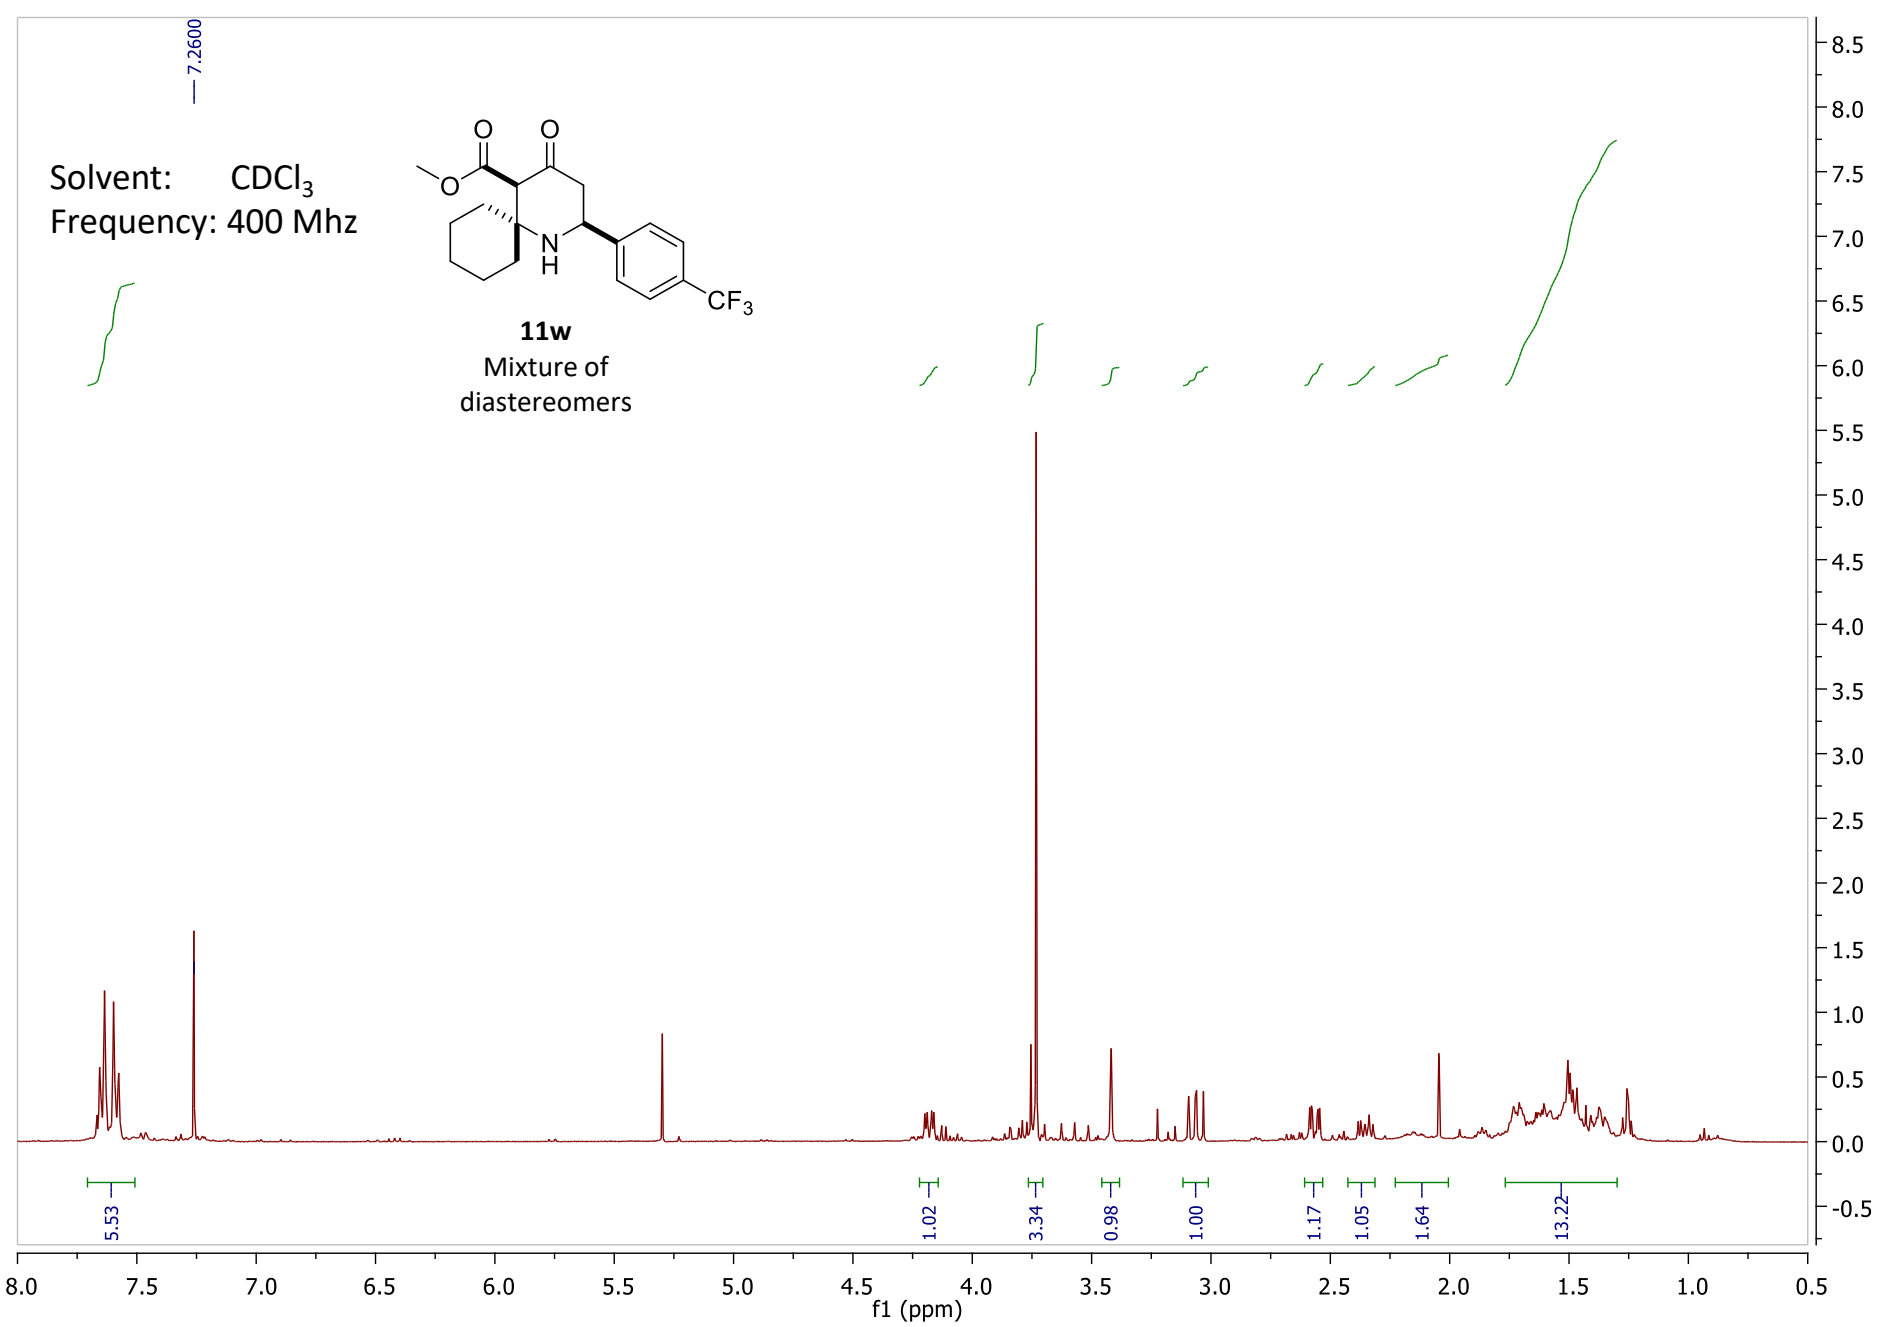

Solvent: CDCl<sub>3</sub>  
Frequency: 101 Mhz

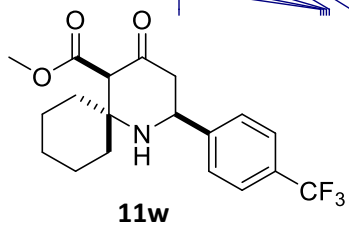

204.6055  
169.4868  
146.3734  
130.5520  
130.2309  
129.9075  
129.5838  
127.1598  
125.9311  
125.8945  
125.8569  
125.8196  
125.5153  
122.8119

77.1600  
68.3891  
68.0666  
66.6250  
60.3250  
59.1906  
54.9383  
54.1220  
52.3015  
48.9419  
45.8382  
42.0863  
36.5659  
33.2959  
29.8050  
27.1247  
25.6572  
21.5345  
21.0206

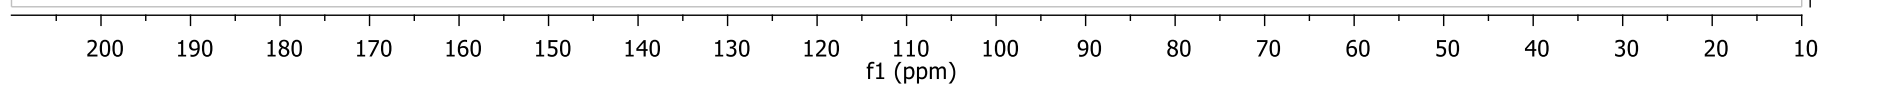

Solvent:  $\text{CDCl}_3$   
Frequency: 376 Mhz

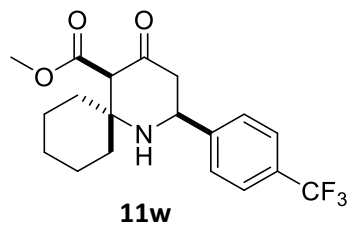

f1 (ppm)

S100

Solvent:  $\text{CDCl}_3$   
Frequency: 400 Mhz

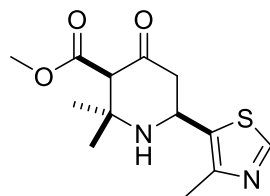

**11x**  
Mixture of  
diastereomers

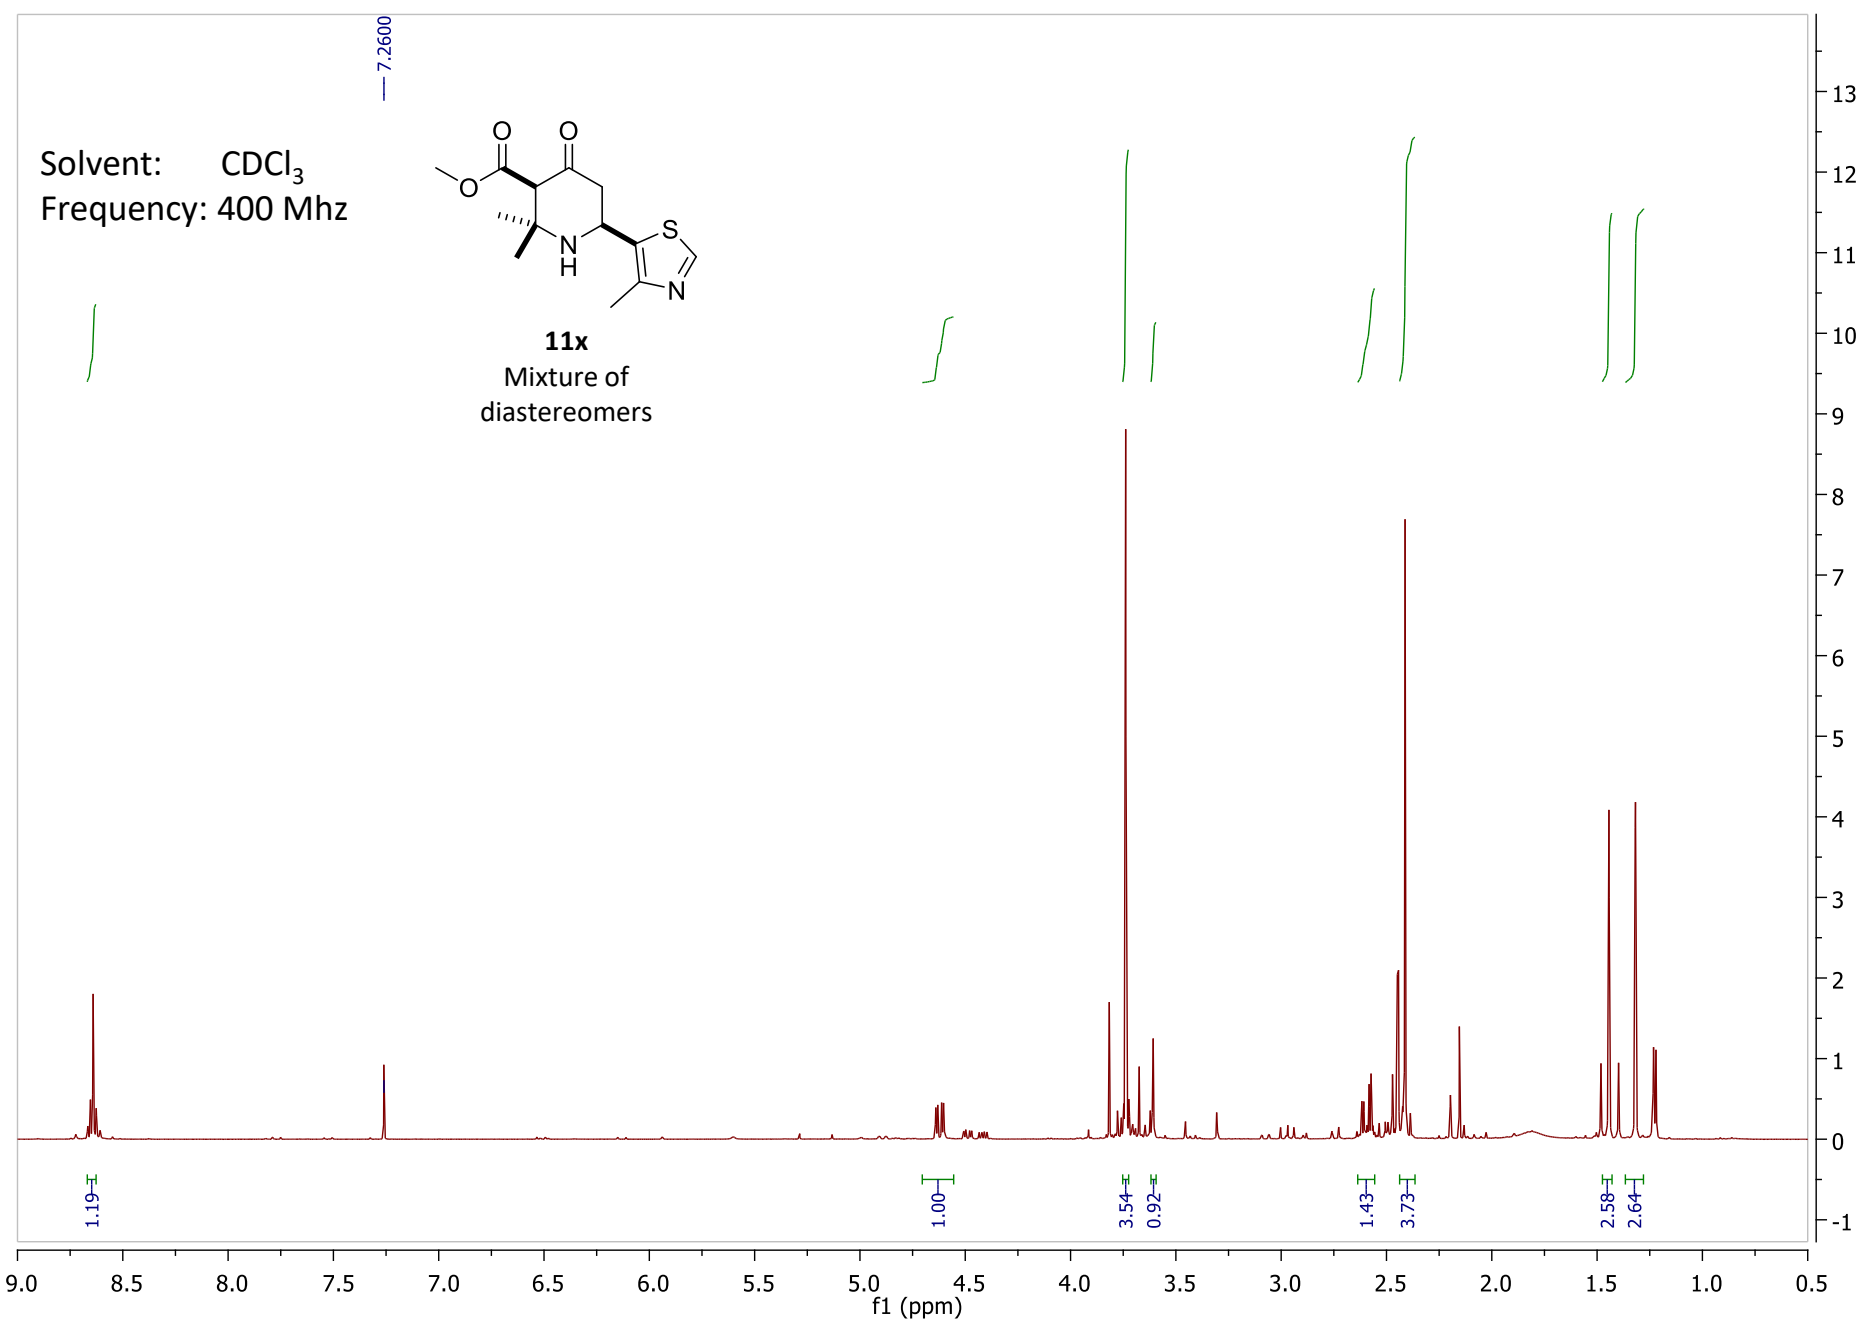

Solvent:  $\text{CDCl}_3$   
Frequency: 101 Mhz

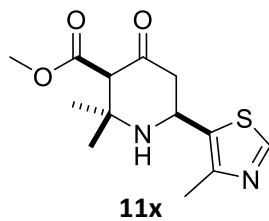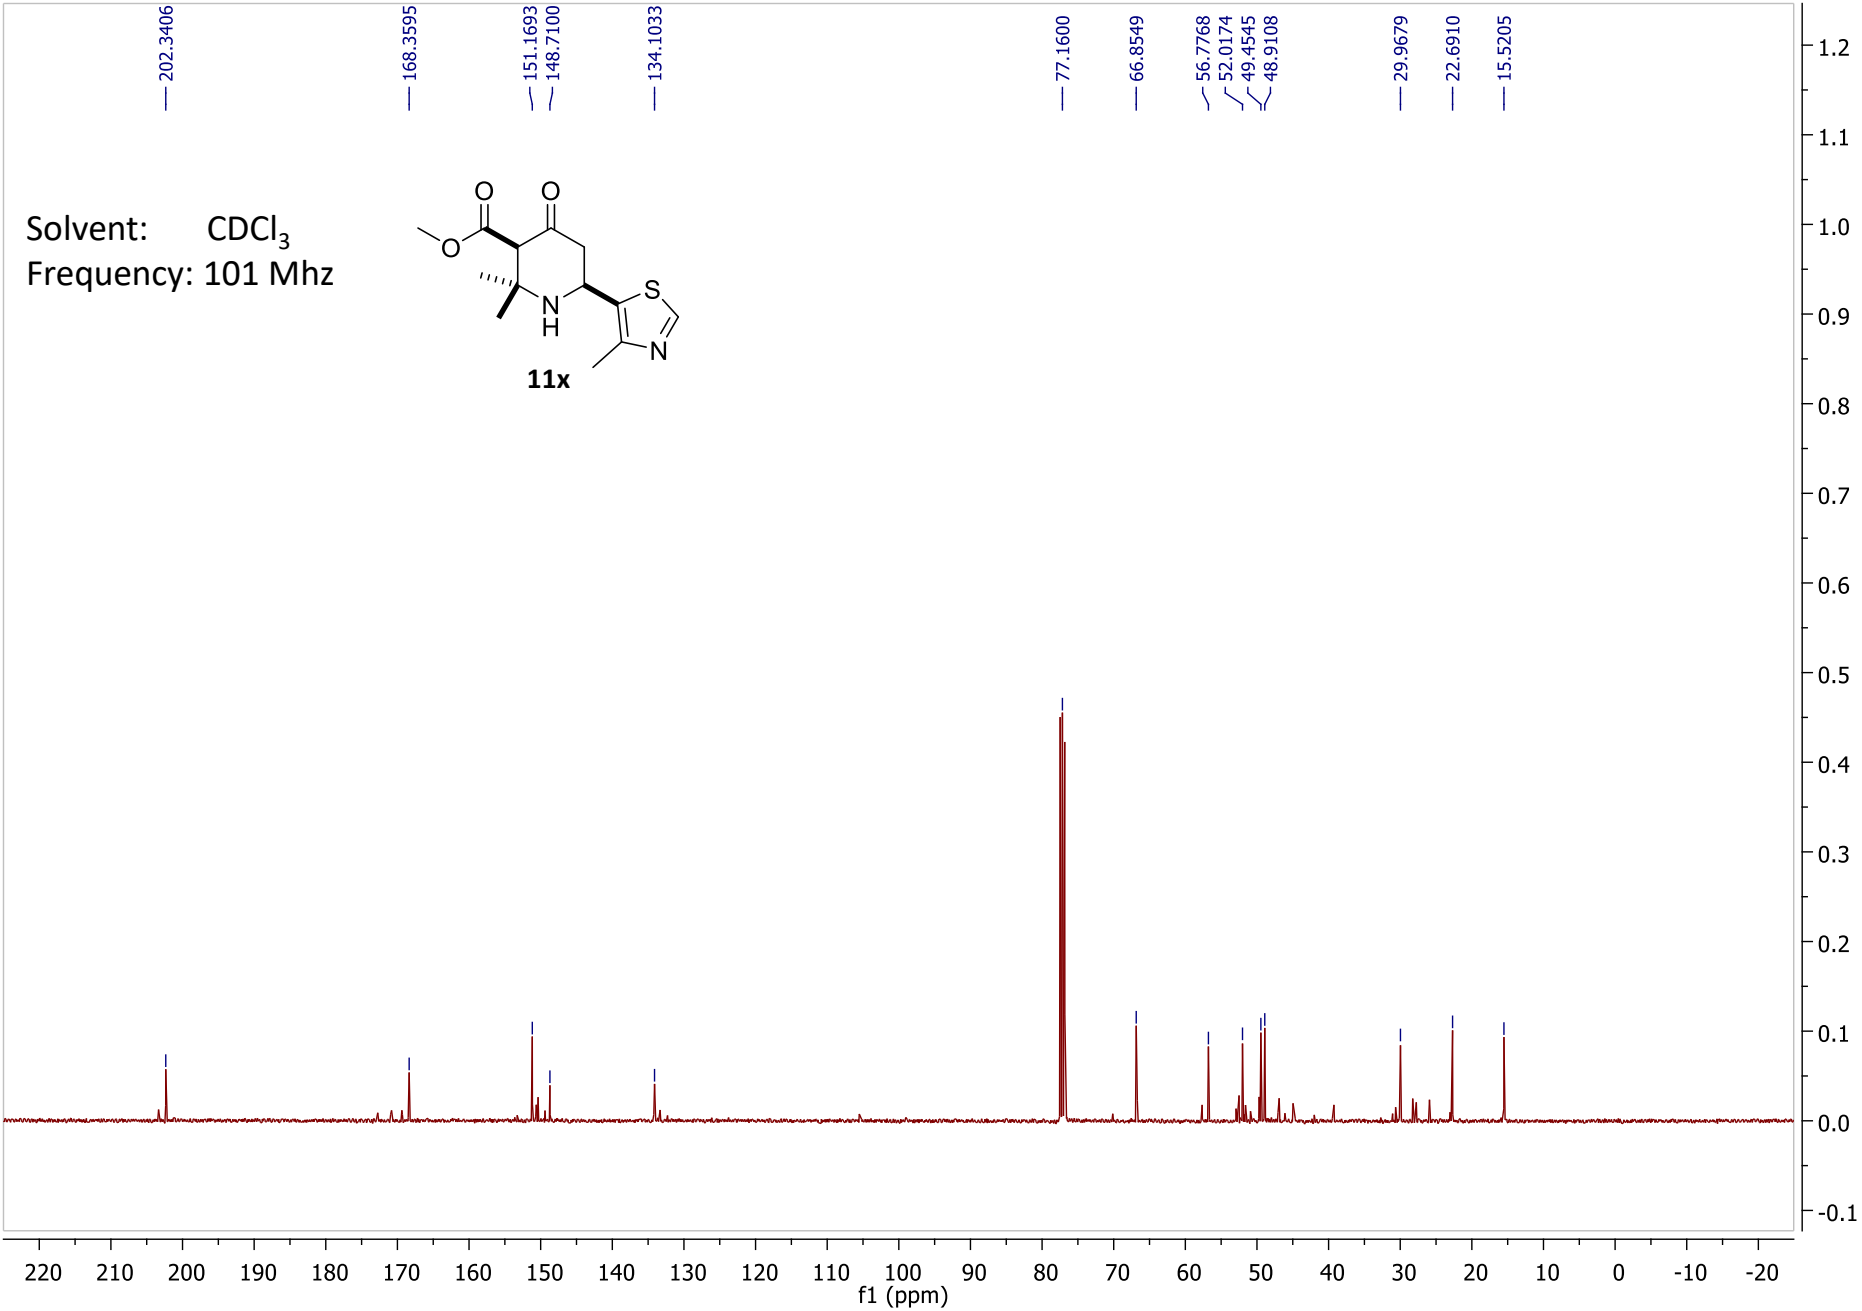

Solvent: CDCl<sub>3</sub>  
Frequency: 400 Mhz

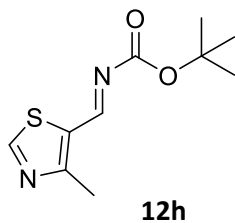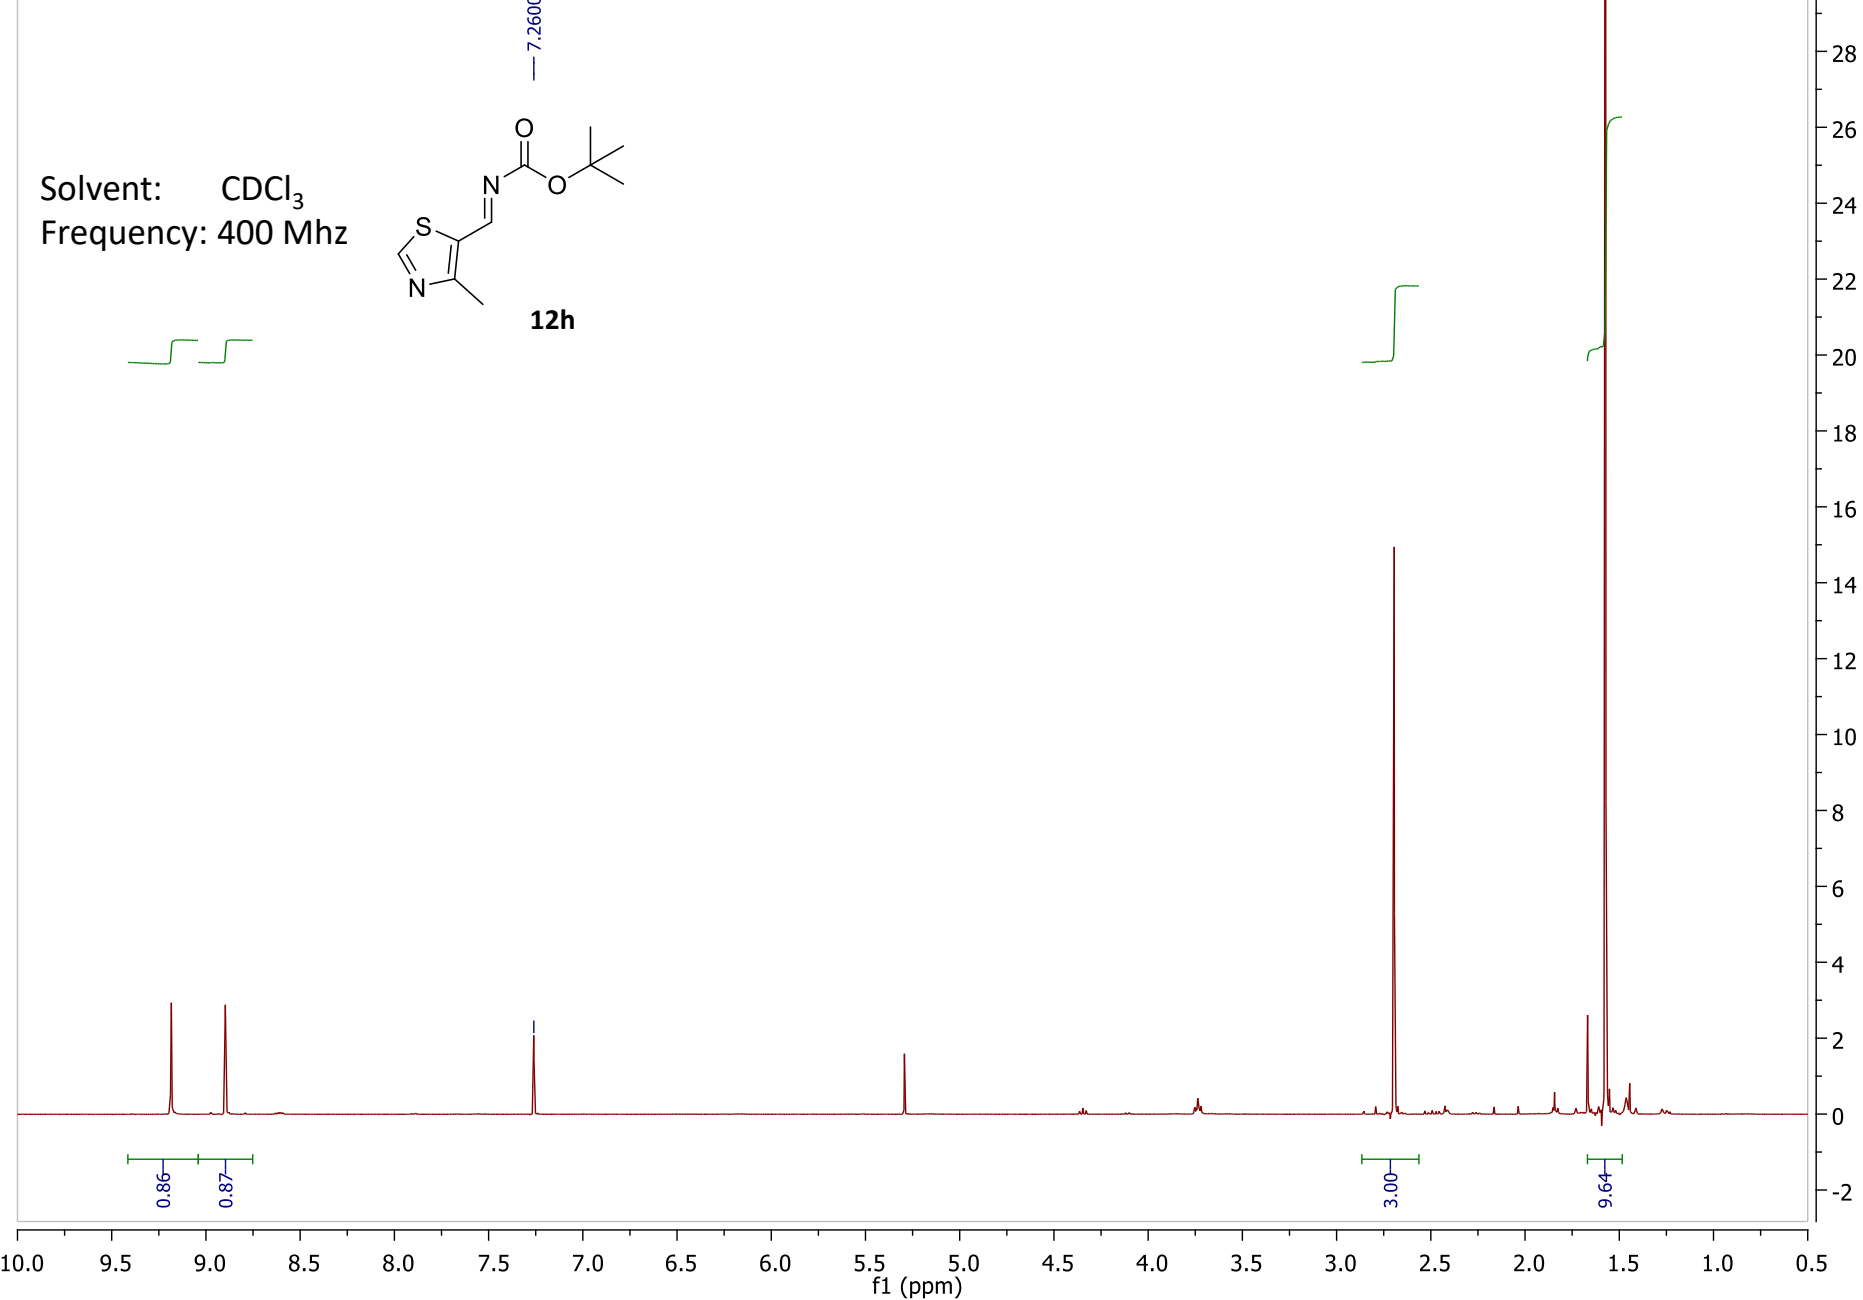

Solvent: CDCl<sub>3</sub>  
Frequency: 101 Mhz

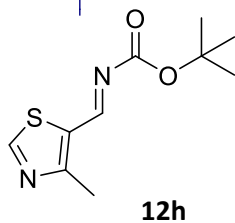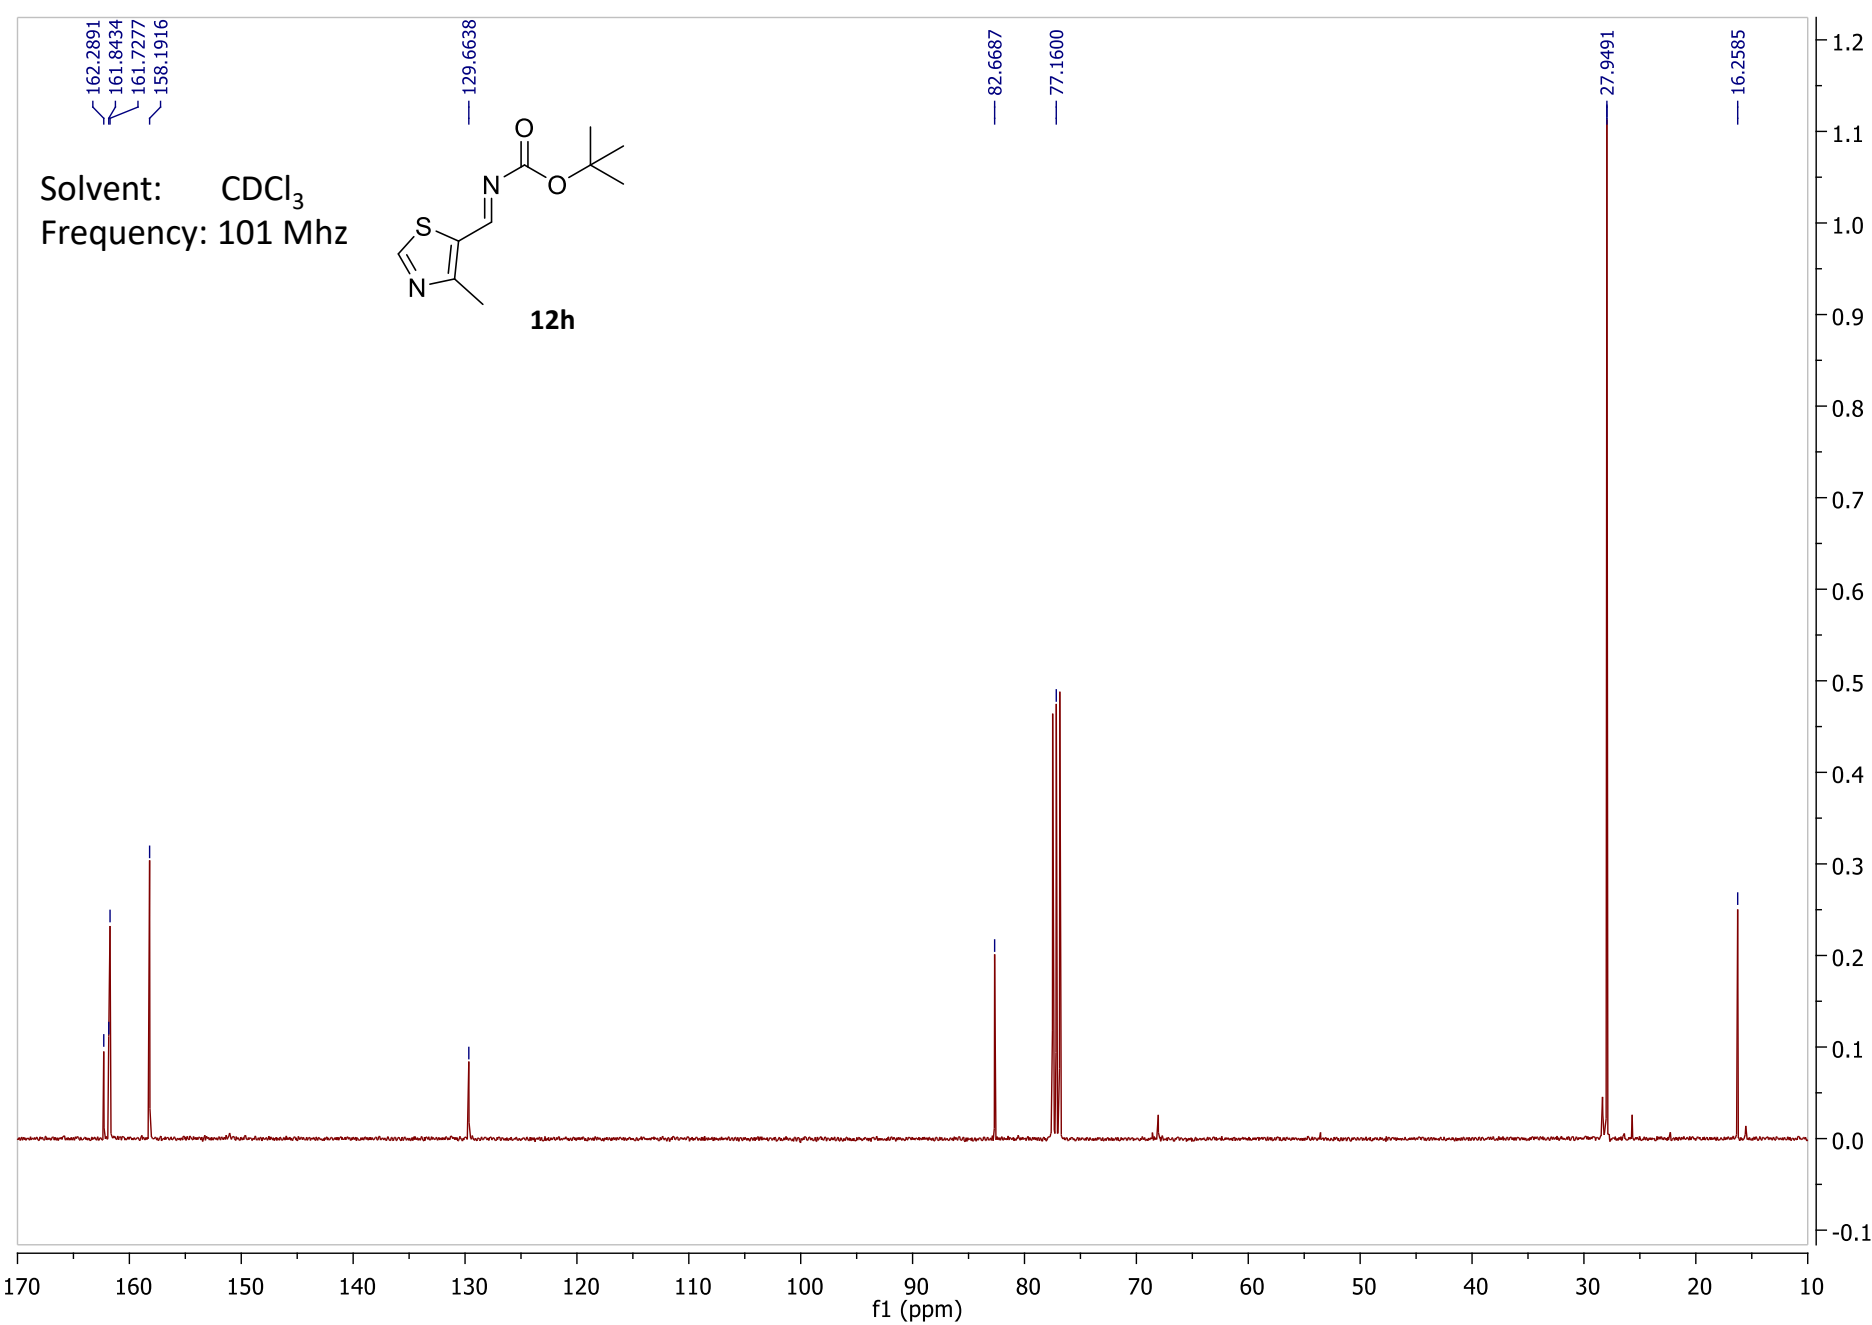

Supplement: c8ob01272e1.pdf [file c8ob01272e1.pdf]
